# Supplementary material for: A δ-cell subpopulation with a pro-β-cell identity contributes to efficient age-independent recovery in a zebrafish model of diabetes
Source: eLife journal article supplement (doi:10.7554/elife.67576), 2022-01-21
Supplement: supp [file elife-67576-supp-v1.zip]

Archive with 29 entries (29 files):
- elife_poa_e67576_Transparent_Reporting_File.docx
- elife_poa_e67576_Figure_1_figure_supplement_1.pdf
- elife_poa_e67576_Figure_1_figure_supplement_2.pdf
- elife_poa_e67576_Figure_1_figure_supplement_3.pdf
- elife_poa_e67576_Figure_2_Figure_supplement_1.pdf
- elife_poa_e67576_Figure_3_Figure_supplement_1.pdf
- elife_poa_e67576_Figure_3_Figure_supplement_2.pdf
- elife_poa_e67576_Figure_5_figure_supplement_1.pdf
- elife_poa_e67576_Figure_6_figure_supplement_1.pdf
- elife_poa_e67576_Figure_6_figure_supplement_2.pdf
- elife_poa_e67576_Figure_7_figure_supplement_1.pdf
- elife_poa_e67576_Figure_1_source_data_1.pdf
- elife_poa_e67576_Figure_1_source_data_2.pdf
- elife_poa_e67576_Figure_3_source_data_1.pdf
- elife_poa_e67576_Figure_3_source_data_2.pdf
- elife_poa_e67576_Figure_3_source_data_3.pdf
- elife_poa_e67576_Figure_3_source_data_4.pdf
- elife_poa_e67576_Figure_4_source_data_1.pdf
- elife_poa_e67576_Figure_4_source_data_2.pdf
- elife_poa_e67576_Figure_5_source_data_1.pdf
- elife_poa_e67576_Figure_5_source_data_2.pdf
- elife_poa_e67576_Figure_5_source_data_3.pdf
- elife_poa_e67576_Figure_5_source_data_4.pdf
- elife_poa_e67576_Figure_5_source_data_5.pdf
- elife_poa_e67576_Figure_6_source_data_1.pdf
- elife_poa_e67576_Figure_6_source_data_2.pdf
- elife_poa_e67576_Figure_6_source_data_3.pdf
- elife_poa_e67576_Figure_6_source_data_4.pdf
- elife_poa_e67576_Figure_7_source_data_1.pdf
