# Supplementary material for: A δ-cell subpopulation with a pro-β-cell identity contributes to efficient age-independent recovery in a zebrafish model of diabetes
Source: eLife journal article supplement (doi:10.7554/elife.67576), 2022-01-21
Supplement: supp [file elife-67576-supp-v1.zip]

**Figure 3-figure supplement 2**

| Transcription factor  | Expression in mouse/human islets (mature/adults) | Zebrafish orthologue | Expression in zebrafish islets (mature/adults)     | Functional orthologue/parologue or equivalent in zebrafish |
|-----------------------|--------------------------------------------------|----------------------|----------------------------------------------------|------------------------------------------------------------|
| <b><i>Neurod1</i></b> | Pan-endocrine                                    | <i>neurod1</i>       | Pan-endocrine                                      |                                                            |
| <b><i>Pax6</i></b>    | Pan-endocrine                                    | <i>pax6b</i>         | Pan-endocrine                                      | <i>pax6b</i>                                               |
| <b><i>Isl1</i></b>    | Pan-endocrine                                    | <i>isl1</i>          | Pan-endocrine                                      |                                                            |
| <b><i>Pdx1</i></b>    | $\beta$ -cells, $\delta$ -cells                  | <i>pdx1</i>          | $\beta$ -cells, sst1.1 $\delta$ -cell (this study) |                                                            |
| <b><i>Nkx6.1</i></b>  | $\beta$ -cells                                   | <i>nkx6.1</i>        | Not expressed in mature islet cells                | <i>nkx6.2</i> in $\beta$ -cells                            |
| <b><i>Nkx6.2</i></b>  | Not detected in mature islet cells               | <i>nkx6.2</i>        | $\beta$ -cells                                     |                                                            |
| <b><i>Mnx1</i></b>    | $\beta$ -cells                                   | <i>mnx1</i>          | $\beta$ -cells and $\alpha$ -cells                 |                                                            |
| <b><i>Hhex</i></b>    | $\delta$ -cells                                  | <i>hhex</i>          | $\delta$ -cells                                    |                                                            |

| Transcription factor                          | Expression in mouse/human pancreatic progenitors           | Zebrafish orthologue | Expression in pancreatic progenitors            | Functional orthologue/parologue or equivalent in zebrafish |
|-----------------------------------------------|------------------------------------------------------------|----------------------|-------------------------------------------------|------------------------------------------------------------|
| <b><i>Ascl1</i> (previously <i>Mash1</i>)</b> | Not expressed in mature islet cells                        | <i>ascl1b</i>        | Not expressed in mature islet cells             | <i>ascl1b</i>                                              |
| <b><i>Neurog3</i></b>                         | Endocrine progenitors. Not expressed in mature islet cells | <i>neurog3</i>       | No expression in zebrafish pancreas             | <i>ascl1b</i> and <i>neurod1</i> in embryonic progenitors  |
| <b><i>Nkx6.1</i></b>                          | Pancreatic embryonic progenitors (ducts)                   | <i>nkx6.1</i>        | Pancreatic embryonic progenitors and duct cells |                                                            |
| <b><i>Sox9</i></b>                            | Pancreatic embryonic progenitors                           | <i>sox9b</i>         | Pancreatic embryonic progenitors                | <i>sox9b</i>                                               |
| <b><i>Pdx1</i></b>                            | Pancreatic embryonic progenitors and duct cells            | <i>Pdx1</i>          | Pancreatic embryonic progenitors and duct cells |                                                            |
