# Supplementary material for: A δ-cell subpopulation with a pro-β-cell identity contributes to efficient age-independent recovery in a zebrafish model of diabetes
Source: eLife journal article supplement (doi:10.7554/elife.67576), 2022-01-21
Supplement: supp [file elife-67576-supp-v1.zip › elife_poa_e67576_Figure_1_figure_supplement_1.pdf]

## Figure 1-figure supplement 1

| Gene_Name | Expression in<br>regenerated $\beta$ -cells |
|-----------|---------------------------------------------|
| ins       | 14801223                                    |
| sst1.1    | 7912534                                     |
| mt-co1    | 435554                                      |
| ppdpfb    | 267739                                      |
| rgs5a     | 256637                                      |
| dkk3b     | 213588                                      |
| mt-co2    | 210445                                      |
| RPL41     | 206138                                      |
| scg3      | 146678                                      |
| calca     | 143619                                      |
| pcsk1     | 137921                                      |
| eef1a1l2  | 133915                                      |
| fosab     | 130543                                      |
| tmsb1     | 130150                                      |
| cst3      | 125586                                      |
| mt-co3    | 107003                                      |
| rpl19     | 95153                                       |
| pcsk2     | 94936                                       |
| rpsa      | 91191                                       |
| mt-cyb    | 89586                                       |
