# Supplementary material for: A δ-cell subpopulation with a pro-β-cell identity contributes to efficient age-independent recovery in a zebrafish model of diabetes
Source: eLife journal article supplement (doi:10.7554/elife.67576), 2022-01-21
Supplement: supp [file elife-67576-supp-v1.zip › elife_poa_e67576_Figure_1_source_data_1.pdf]

Figure 1-Source Data 1

**Blood glucose (mg/dl) in adult fish**

| CTL | 3 dpt | 20 dpt |
|-----|-------|--------|
| 61  | 426   | 149    |
| 53  | 600   | 190    |
| 51  | 283   | 104    |
| 61  | 600   | 88     |
| 62  | 600   | 102    |
| 51  | 600   | 82     |
| 49  | 600   | 177    |
| 55  | 600   | 101    |
| 64  | 493   | 121    |
| 62  | 505   | 111    |
| 60  | 517   | 132    |
| 50  | 568   | 127    |
| 58  | 426   | 123    |
| 61  | 600   | 67     |
| 96  | 283   | 139    |
| 61  | 600   | 127    |
| 62  | 600   | 87     |
| 95  | 600   | 103    |
| 81  | 600   | 103    |
| 50  | 600   | 149    |
| 58  | 493   | 104    |
| 61  | 505   | 88     |
| 96  | 517   | 102    |
| 61  | 568   | 82     |
| 62  | 308   | 177    |
| 51  | 232   | 101    |
| 49  | 232   | 121    |
| 86  | 285   | 111    |
| 64  | 580   | 132    |
| 73  | 600   | 127    |
| 90  | 600   | 123    |
| 81  | 600   | 67     |
| 104 | 600   | 139    |
| 89  |       | 127    |
| 69  |       | 87     |
| 61  |       | 103    |
| 62  |       | 103    |
| 95  |       | 141    |
| 55  |       | 161    |
| 64  |       |        |
| 62  |       |        |
| 60  |       |        |
| 61  |       |        |
| 53  |       |        |
| 51  |       |        |
