# Supplementary material for: A δ-cell subpopulation with a pro-β-cell identity contributes to efficient age-independent recovery in a zebrafish model of diabetes
Source: eLife journal article supplement (doi:10.7554/elife.67576), 2022-01-21
Supplement: supp [file elife-67576-supp-v1.zip › elife_poa_e67576_Figure_1_source_data_2.pdf]

Figure 1-Source Data 2

**Total islet cell number**

| CTL   | 3dpt  | 20dpt |
|-------|-------|-------|
| 13532 | 10740 | 12075 |
| 12419 | 14771 | 9827  |
| 14712 | 6795  | 9149  |
| 10016 | 8941  | 6833  |
| 15137 | 12361 | 10043 |
| 10646 | 12701 | 14604 |
| 18386 | 6317  | 10789 |
| 11648 | 8122  | 10684 |
| 8907  |       |       |
| 16418 |       |       |
| 18033 |       |       |

**ins:mCherry+ (GFP-) cells**

| CTL  | 3dpt | 20dpt |
|------|------|-------|
| 2784 | 64   | 49    |
| 2929 | 203  | 8     |
| 2750 | 218  | 8     |
| 2609 | 122  | 10    |
| 5034 | 62   | 14    |
| 1512 | 88   | 12    |
| 5215 | 47   | 5     |
| 3011 | 38   | 5     |
| 1837 |      |       |
| 4008 |      |       |
| 4354 |      |       |

**sst1.1:GFP+ (mCherry-) cells**

| CTL  | 3dpt | 20dpt |
|------|------|-------|
| 2030 | 2208 | 741   |
| 2558 | 3614 | 2014  |
| 4002 | 1984 | 1373  |
| 2499 | 2561 | 1638  |
| 3299 | 1838 | 2378  |
| 2342 | 2981 | 2018  |
| 3147 | 1954 | 957   |
| 2594 | 1875 | 1432  |
| 2110 |      |       |
| 3181 |      |       |
| 3403 |      |       |
