# Supplementary material for: A δ-cell subpopulation with a pro-β-cell identity contributes to efficient age-independent recovery in a zebrafish model of diabetes
Source: eLife journal article supplement (doi:10.7554/elife.67576), 2022-01-21
Supplement: supp [file elife-67576-supp-v1.zip › elife_poa_e67576_Figure_3_source_data_1.pdf]

**Figure 3-Source Data 1. Significantly differentially expressed genes between  $\beta$ -cells (CTL\_Beta) and bihormonal cells (20dpt\_Bihormonal) from DESeq (Padj<0.05)**

| Ensembl_ID          | Gene_Name        | Mean_<br>CTL_Beta | Mean_<br>20dpt_Bihormonal | Log2FC | Padj     |
|---------------------|------------------|-------------------|---------------------------|--------|----------|
| ENSDARG00000061140  | colec12          | 0                 | 265                       | 8,19   | 4,32E-12 |
| ENSDARG00000039067  | srd5a2b          | 11                | 3602                      | 7,97   | 7,35E-20 |
| ENSDARG00000098231  | HHEX             | 2                 | 491                       | 7,75   | 8,43E-19 |
| ENSDARG00000018817  | bdnf             | 7                 | 2437                      | 7,73   | 2,37E-16 |
| ENSDARG00000040799  | sst1.1           | 12837             | 6638811                   | 7,71   | 1,46E-13 |
| ENSDARG00000044691  | ppp1r3b          | 1                 | 568                       | 7,67   | 2,32E-11 |
| ENSDARG00000102687  | CABZ01085139.1   | 14                | 5046                      | 7,54   | 5,06E-14 |
| ENSDARG00000099732  | gfra1a           | 8                 | 2869                      | 7,37   | 2,39E-13 |
| ENSDARG00000103295  | cyp3a65          | 21                | 5050                      | 7,26   | 2,63E-15 |
| ENSDARG00000101095  | cpne4a           | 15                | 3272                      | 7,16   | 2,56E-15 |
| ENSDARG00000007682  | ppdpfa           | 75                | 16778                     | 7,04   | 1,46E-13 |
| ENSDARG00000017790  | chrnb2b          | 0                 | 110                       | 6,93   | 6,33E-11 |
| ENSDARG00000055154  | slc8a4a          | 1                 | 231                       | 6,86   | 2,31E-11 |
| ENSDARG00000099446  | slit1b           | 0                 | 490                       | 6,81   | 1,02E-07 |
| ENSDARG00000105201  | adcyp1r1a        | 9                 | 1216                      | 6,75   | 2,57E-17 |
| ENSDARG00000101508  | nr6a1a           | 1                 | 294                       | 6,73   | 2,11E-12 |
| ENSDARG00000032639  | cd36             | 2                 | 362                       | 6,72   | 3,60E-14 |
| ENSDARG00000000943  | dzip1            | 1                 | 132                       | 6,71   | 8,86E-13 |
| ENSDARG000000069254 | chrn4a           | 9                 | 1415                      | 6,63   | 1,46E-13 |
| ENSDARG00000052012  | rtn4rl2a         | 3                 | 453                       | 6,61   | 6,29E-13 |
| ENSDARG00000001912  | drd4-rs          | 2                 | 365                       | 6,53   | 7,88E-12 |
| ENSDARG00000045750  | syt10            | 5                 | 591                       | 6,50   | 2,63E-15 |
| ENSDARG00000043589  | ca4a             | 58                | 9131                      | 6,48   | 5,03E-12 |
| ENSDARG00000055565  | cacnb2b          | 2                 | 252                       | 6,46   | 1,71E-14 |
| ENSDARG00000069028  | rxfp3.3a1        | 3                 | 424                       | 6,45   | 2,30E-13 |
| ENSDARG00000069698  | lrguk            | 7                 | 808                       | 6,43   | 1,68E-14 |
| ENSDARG00000076351  | brinp3a.1        | 0                 | 90                        | 6,30   | 8,08E-09 |
| ENSDARG00000093714  | artnb            | 1                 | 102                       | 6,30   | 1,13E-10 |
| ENSDARG00000079907  | ptger4c          | 0                 | 239                       | 6,27   | 1,33E-08 |
| ENSDARG00000111920  | cplx1            | 1                 | 128                       | 6,24   | 1,55E-11 |
| ENSDARG00000038489  | b3gnt7           | 3                 | 302                       | 6,23   | 2,30E-13 |
| ENSDARG00000002533  | adora2b          | 1                 | 136                       | 6,20   | 2,48E-09 |
| ENSDARG00000098289  | vstm2l           | 1                 | 181                       | 6,20   | 1,01E-11 |
| ENSDARG00000020289  | pif1             | 0                 | 121                       | 6,18   | 3,03E-08 |
| ENSDARG00000005780  | npy8br           | 2                 | 255                       | 6,16   | 2,63E-15 |
| ENSDARG00000035198  | gcnt4a           | 0                 | 130                       | 6,16   | 2,58E-08 |
| ENSDARG00000036036  | mdka             | 2                 | 235                       | 6,16   | 1,34E-11 |
| ENSDARG00000104005  | slc4a3           | 6                 | 535                       | 6,15   | 8,43E-19 |
| ENSDARG00000099708  | cacna1hb         | 0                 | 62                        | 6,08   | 7,20E-08 |
| ENSDARG00000055026  | ptch2            | 0                 | 41                        | 5,97   | 2,64E-08 |
| ENSDARG00000054253  | sobpa            | 1                 | 96                        | 5,91   | 2,69E-11 |
| ENSDARG00000069294  | insl5b           | 2                 | 1242                      | 5,86   | 2,48E-09 |
| ENSDARG00000114760  | asip2b           | 5                 | 967                       | 5,81   | 9,78E-08 |
| ENSDARG00000074317  | fam20ca          | 1                 | 80                        | 5,77   | 9,44E-10 |
| ENSDARG00000079978  | samd10a          | 1                 | 68                        | 5,74   | 2,87E-09 |
| ENSDARG00000062165  | tub              | 2                 | 179                       | 5,73   | 8,31E-13 |
| ENSDARG00000016793  | crybb1l2         | 1                 | 174                       | 5,66   | 1,58E-07 |
| ENSDARG00000032743  | si:dkey-11p23.7  | 0                 | 35                        | 5,60   | 1,11E-07 |
| ENSDARG00000114192  | BX548011.5       | 3                 | 400                       | 5,56   | 2,79E-06 |
| ENSDARG00000004378  | yrk              | 7                 | 468                       | 5,53   | 3,23E-12 |
| ENSDARG000000075858 | fam155a          | 1                 | 64                        | 5,50   | 2,94E-10 |
| ENSDARG00000091073  | alkal2a          | 0                 | 57                        | 5,47   | 3,26E-07 |
| ENSDARG00000045880  | gas2l3           | 7                 | 360                       | 5,38   | 1,11E-13 |
| ENSDARG00000087241  | ucn3l            | 69                | 4267                      | 5,37   | 2,29E-10 |
| ENSDARG00000091277  | adra2da          | 12                | 607                       | 5,34   | 2,76E-12 |
| ENSDARG00000011672  | sema3b           | 3                 | 169                       | 5,32   | 7,38E-14 |
| ENSDARG00000018643  | igf2a            | 0                 | 62                        | 5,32   | 2,53E-06 |
| ENSDARG00000096739  | si:dkey-219e21.2 | 0                 | 43                        | 5,31   | 2,07E-08 |
| ENSDARG00000101481  | rbp5             | 1                 | 76                        | 5,29   | 8,57E-11 |

|                    |                   |     |       |      |          |
|--------------------|-------------------|-----|-------|------|----------|
| ENSDARG00000044954 | slit1a            | 7   | 304   | 5,28 | 1,12E-15 |
| ENSDARG00000009418 | mef2cb            | 1   | 81    | 5,27 | 6,33E-11 |
| ENSDARG00000040610 | si:ch73-352p4.8   | 1   | 58    | 5,27 | 8,86E-07 |
| ENSDARG00000068247 | luzp2             | 19  | 798   | 5,24 | 1,02E-16 |
| ENSDARG00000028845 | calcr             | 0   | 31    | 5,21 | 7,25E-05 |
| ENSDARG00000068726 | masp1             | 0   | 47    | 5,21 | 6,49E-07 |
| ENSDARG00000079542 | stard13a          | 5   | 220   | 5,20 | 4,26E-12 |
| ENSDARG00000055539 | epdl2             | 0   | 88    | 5,19 | 4,51E-06 |
| ENSDARG00000101234 | nsmfb             | 1   | 88    | 5,18 | 3,59E-08 |
| ENSDARG00000042816 | mmp9              | 7   | 362   | 5,18 | 3,41E-11 |
| ENSDARG00000073963 | si:ch211-258f14.2 | 3   | 176   | 5,15 | 5,51E-08 |
| ENSDARG00000036965 | rnf24             | 0   | 22    | 5,14 | 2,85E-08 |
| ENSDARG00000031751 | npr1a             | 27  | 1049  | 5,14 | 7,20E-17 |
| ENSDARG00000100739 | CABZ01052573.1    | 0   | 33    | 5,10 | 5,12E-06 |
| ENSDARG00000094132 | igf1              | 1   | 43    | 5,10 | 9,20E-07 |
| ENSDARG00000058460 | cacng3a           | 0   | 63    | 5,09 | 8,04E-06 |
| ENSDARG00000055284 | afap1             | 1   | 72    | 5,09 | 1,75E-08 |
| ENSDARG00000078322 | col12a1a          | 1   | 78    | 5,08 | 1,18E-07 |
| ENSDARG00000073957 | tox3              | 11  | 386   | 5,06 | 3,98E-18 |
| ENSDARG00000113674 | CABZ01058222.1    | 7   | 307   | 4,99 | 1,62E-10 |
| ENSDARG00000011797 | fam46bb           | 2   | 82    | 4,95 | 4,19E-08 |
| ENSDARG00000056888 | dnah5l            | 1   | 67    | 4,95 | 8,11E-10 |
| ENSDARG00000040338 | hvcn1             | 1   | 71    | 4,91 | 4,57E-09 |
| ENSDARG00000102636 | trmt9b            | 17  | 618   | 4,89 | 4,26E-12 |
| ENSDARG00000055843 | cdh10a            | 5   | 288   | 4,89 | 1,11E-07 |
| ENSDARG00000013312 | cadps2            | 0   | 38    | 4,86 | 8,43E-06 |
| ENSDARG00000098295 | efna3b            | 0   | 26    | 4,85 | 1,50E-06 |
| ENSDARG00000007950 | itga11b           | 0   | 35    | 4,81 | 1,07E-06 |
| ENSDARG00000061819 | wscd2             | 4   | 143   | 4,80 | 1,46E-13 |
| ENSDARG00000033161 | sst1.2            | 841 | 37226 | 4,77 | 6,79E-09 |
| ENSDARG00000069134 | vwc2l             | 1   | 52    | 4,77 | 6,88E-08 |
| ENSDARG00000060457 | pmp22b            | 5   | 170   | 4,77 | 7,74E-11 |
| ENSDARG00000055123 | kcnk2a            | 0   | 29    | 4,76 | 6,99E-06 |
| ENSDARG00000067781 | urp2              | 7   | 349   | 4,76 | 1,12E-07 |
| ENSDARG00000088072 | usp43b            | 1   | 34    | 4,76 | 1,35E-08 |
| ENSDARG00000043323 | lnx1              | 4   | 138   | 4,74 | 1,48E-10 |
| ENSDARG00000035899 | lingo1b           | 0   | 57    | 4,73 | 2,24E-05 |
| ENSDARG00000035966 | pgr               | 41  | 1345  | 4,72 | 2,31E-11 |
| ENSDARG00000020031 | cldn11a           | 1   | 41    | 4,70 | 5,38E-07 |
| ENSDARG00000095788 | ghrhl             | 0   | 24    | 4,68 | 6,80E-06 |
| ENSDARG00000003293 | sox9a             | 4   | 157   | 4,67 | 9,54E-09 |
| ENSDARG00000023316 | sim1a             | 36  | 1133  | 4,67 | 3,51E-11 |
| ENSDARG00000037455 | ugt8              | 4   | 145   | 4,66 | 7,74E-11 |
| ENSDARG00000070522 | cacna1i           | 10  | 293   | 4,65 | 2,92E-12 |
| ENSDARG00000019772 | si:ch1073-280e3.1 | 2   | 75    | 4,65 | 4,95E-08 |
| ENSDARG00000024167 | kcnh1a            | 1   | 50    | 4,65 | 2,99E-07 |
| ENSDARG00000090624 | ADGRL3            | 9   | 310   | 4,63 | 7,38E-10 |
| ENSDARG00000003991 | fhl2b             | 0   | 37    | 4,61 | 1,48E-05 |
| ENSDARG00000002336 | dlc               | 70  | 2389  | 4,61 | 1,21E-08 |
| ENSDARG00000073713 | vav3b             | 24  | 773   | 4,60 | 2,48E-09 |
| ENSDARG00000010816 | slc7a14a          | 42  | 1083  | 4,59 | 9,91E-18 |
| ENSDARG00000054055 | ostn              | 2   | 320   | 4,58 | 1,12E-05 |
| ENSDARG00000042646 | zgc:77784         | 2   | 61    | 4,55 | 2,41E-08 |
| ENSDARG00000058348 | scinlb            | 17  | 462   | 4,54 | 2,30E-13 |
| ENSDARG00000073872 | tpst1             | 11  | 316   | 4,53 | 2,32E-11 |
| ENSDARG00000025017 | prdm8             | 0   | 98    | 4,53 | 3,36E-05 |
| ENSDARG00000100267 | FO904977.1        | 2   | 50    | 4,53 | 2,84E-10 |
| ENSDARG00000099979 | tgfbr3            | 1   | 42    | 4,53 | 2,83E-07 |
| ENSDARG00000044541 | ppp1r14ba         | 1   | 31    | 4,52 | 2,44E-08 |
| ENSDARG00000099211 | si:dkey-220o5.5   | 0   | 42    | 4,51 | 3,76E-05 |
| ENSDARG00000062420 | nfia              | 0   | 24    | 4,50 | 6,05E-06 |
| ENSDARG00000027065 | slc38a3a          | 1   | 43    | 4,49 | 3,67E-08 |
| ENSDARG00000077298 | gas1a             | 11  | 293   | 4,48 | 6,05E-13 |
| ENSDARG00000079462 | si:ch211-131k2.3  | 1   | 39    | 4,48 | 9,71E-07 |
| ENSDARG00000100053 | CABZ01044099.1    | 1   | 26    | 4,48 | 2,22E-06 |

|                     |                   |      |        |      |          |
|---------------------|-------------------|------|--------|------|----------|
| ENSDARG00000089221  | si:ch211-195o20.7 | 1    | 40     | 4,47 | 2,43E-07 |
| ENSDARG00000063097  | scube1            | 3    | 93     | 4,45 | 1,92E-09 |
| ENSDARG00000015495  | klf3              | 11   | 303    | 4,45 | 8,03E-10 |
| ENSDARG000000055833 | si:dkey-216e24.3  | 1    | 41     | 4,42 | 5,76E-06 |
| ENSDARG00000102702  | lrrn3b            | 8    | 205    | 4,42 | 6,09E-14 |
| ENSDARG00000078560  | slc9a5            | 12   | 298    | 4,40 | 1,04E-11 |
| ENSDARG00000043664  | si:dkey-63b1.1    | 2    | 78     | 4,39 | 9,14E-06 |
| ENSDARG00000058464  | rasd3             | 5    | 141    | 4,39 | 8,52E-08 |
| ENSDARG00000069160  | fam19a5a          | 3    | 74     | 4,37 | 7,12E-12 |
| ENSDARG00000004074  | bach2b            | 2    | 47     | 4,36 | 4,96E-08 |
| ENSDARG00000105113  | galr2b            | 1    | 66     | 4,36 | 1,90E-04 |
| ENSDARG00000111585  | CABZ01048666.1    | 1    | 26     | 4,36 | 1,27E-05 |
| ENSDARG00000054321  | ngs               | 0    | 27     | 4,36 | 1,24E-05 |
| ENSDARG00000070000  | txnipb            | 0    | 111    | 4,35 | 5,53E-05 |
| ENSDARG00000068892  | sostdc1a          | 4    | 151    | 4,32 | 1,03E-05 |
| ENSDARG00000070683  | dkk3b             | 7150 | 167305 | 4,32 | 4,01E-11 |
| ENSDARG00000040649  | prickle1a         | 3    | 86     | 4,31 | 4,06E-08 |
| ENSDARG00000100128  | CU861477.1        | 4    | 119    | 4,31 | 7,91E-08 |
| ENSDARG00000005894  | slc7a9            | 6    | 154    | 4,30 | 1,02E-07 |
| ENSDARG000000087601 | gpr153            | 7    | 163    | 4,30 | 1,01E-09 |
| ENSDARG00000090190  | bcam              | 2    | 53     | 4,30 | 1,06E-09 |
| ENSDARG00000015515  | mc4r              | 15   | 341    | 4,29 | 6,33E-11 |
| ENSDARG00000056909  | LO018309.1        | 2    | 74     | 4,27 | 3,14E-07 |
| ENSDARG00000058179  | ackr3b            | 0    | 26     | 4,27 | 2,64E-06 |
| ENSDARG00000067848  | nmrk2             | 4    | 119    | 4,26 | 1,33E-07 |
| ENSDARG00000045016  | npffl             | 2    | 52     | 4,25 | 8,60E-07 |
| ENSDARG00000092057  | si:dkey-90l23.1   | 154  | 4570   | 4,24 | 5,03E-06 |
| ENSDARG00000059798  | kcnq1             | 0    | 23     | 4,23 | 5,16E-04 |
| ENSDARG00000098221  | st8sia1           | 1    | 43     | 4,23 | 1,05E-06 |
| ENSDARG00000061940  | htr4              | 0    | 65     | 4,22 | 1,13E-04 |
| ENSDARG00000004576  | plk4              | 5    | 141    | 4,18 | 4,99E-07 |
| ENSDARG00000028899  | tekt4             | 1    | 38     | 4,17 | 7,51E-07 |
| ENSDARG00000012306  | syt13             | 1    | 40     | 4,15 | 2,55E-05 |
| ENSDARG00000090686  | slc35f2l          | 1    | 33     | 4,14 | 2,50E-06 |
| ENSDARG00000019096  | myl7              | 6    | 152    | 4,12 | 3,87E-07 |
| ENSDARG00000007245  | rundc3aa          | 1    | 24     | 4,12 | 4,12E-07 |
| ENSDARG00000062447  | hecw2a            | 10   | 210    | 4,12 | 7,18E-09 |
| ENSDARG00000099903  | si:ch211-193l2.10 | 20   | 401    | 4,11 | 2,01E-11 |
| ENSDARG00000035009  | trim35-27         | 1    | 37     | 4,10 | 2,40E-07 |
| ENSDARG00000063475  | abcg1             | 2    | 55     | 4,08 | 8,51E-09 |
| ENSDARG00000102336  | FQ377903.2        | 1    | 58     | 4,06 | 3,45E-04 |
| ENSDARG00000055226  | slc7a7            | 27   | 521    | 4,06 | 6,32E-11 |
| ENSDARG00000021909  | VSTM2A            | 6    | 114    | 4,03 | 2,94E-10 |
| ENSDARG00000099133  | si:ch73-72b7.1    | 1    | 22     | 4,01 | 2,77E-06 |
| ENSDARG00000060927  | si:ch211-136a13.1 | 2    | 83     | 3,99 | 5,26E-05 |
| ENSDARG00000060025  | nsmfa             | 2    | 55     | 3,99 | 1,43E-06 |
| ENSDARG00000086665  | si:dkey-175g6.2   | 46   | 1012   | 3,99 | 5,97E-07 |
| ENSDARG00000103961  | poln              | 2    | 37     | 3,98 | 7,08E-07 |
| ENSDARG00000034344  | pcdh19            | 13   | 296    | 3,98 | 1,93E-06 |
| ENSDARG00000057671  | epas1b            | 23   | 420    | 3,97 | 2,96E-10 |
| ENSDARG000000058053 | serping1          | 2    | 39     | 3,97 | 1,05E-06 |
| ENSDARG00000087599  | TENM3             | 27   | 458    | 3,94 | 4,16E-13 |
| ENSDARG00000104315  | fhl3b             | 3    | 80     | 3,93 | 2,16E-06 |
| ENSDARG00000079578  | rbpms2b           | 2    | 45     | 3,93 | 8,49E-09 |
| ENSDARG00000055099  | fam184b           | 7    | 118    | 3,91 | 3,97E-11 |
| ENSDARG00000104361  | barhl2            | 3    | 66     | 3,91 | 1,14E-05 |
| ENSDARG00000079738  | znf219            | 2    | 38     | 3,90 | 1,32E-06 |
| ENSDARG00000002131  | celf2             | 11   | 184    | 3,90 | 6,71E-13 |
| ENSDARG00000006849  | asic2             | 1    | 32     | 3,89 | 3,80E-07 |
| ENSDARG00000055232  | fancc             | 4    | 66     | 3,88 | 3,80E-11 |
| ENSDARG00000028824  | slc34a1a          | 11   | 184    | 3,87 | 6,81E-10 |
| ENSDARG00000067545  | adam19b           | 12   | 227    | 3,87 | 1,68E-07 |
| ENSDARG00000037553  | il1rapl2          | 2    | 40     | 3,86 | 4,26E-07 |
| ENSDARG00000009281  | dnm1b             | 8    | 134    | 3,86 | 1,54E-09 |
| ENSDARG00000079414  | sez6b             | 9    | 162    | 3,85 | 2,05E-07 |

|                     |                  |     |      |      |          |
|---------------------|------------------|-----|------|------|----------|
| ENSDARG00000046013  | rasl11a          | 2   | 86   | 3,83 | 5,88E-04 |
| ENSDARG00000024017  | mdga2a           | 5   | 92   | 3,83 | 3,29E-10 |
| ENSDARG00000069765  | syngap1b         | 1   | 30   | 3,83 | 1,88E-06 |
| ENSDARG00000070735  | rnd2             | 1   | 22   | 3,83 | 7,91E-06 |
| ENSDARG00000087633  | si:dkey-11o18.5  | 1   | 28   | 3,83 | 1,86E-05 |
| ENSDARG00000104664  | dclk1b           | 12  | 220  | 3,82 | 2,98E-07 |
| ENSDARG00000061249  | myom1a           | 8   | 164  | 3,82 | 2,33E-06 |
| ENSDARG00000052207  | c3a.3            | 2   | 143  | 3,81 | 6,41E-04 |
| ENSDARG00000029219  | avpr2ab          | 3   | 56   | 3,81 | 1,37E-07 |
| ENSDARG00000068182  | crb3b            | 5   | 90   | 3,80 | 2,69E-06 |
| ENSDARG00000054023  | ttl6             | 4   | 60   | 3,79 | 4,09E-09 |
| ENSDARG00000058471  | plk1             | 2   | 56   | 3,79 | 3,89E-05 |
| ENSDARG00000036670  | aplnrb           | 0   | 351  | 3,75 | 3,80E-06 |
| ENSDARG00000078953  | epn3a            | 25  | 352  | 3,75 | 1,44E-13 |
| ENSDARG00000060238  | uacab            | 18  | 262  | 3,75 | 1,71E-14 |
| ENSDARG00000093874  | si:dkey-196j8.2  | 1   | 30   | 3,74 | 2,33E-05 |
| ENSDARG00000075956  | faxca            | 15  | 233  | 3,72 | 1,55E-09 |
| ENSDARG00000074335  | boc              | 52  | 823  | 3,71 | 5,49E-08 |
| ENSDARG00000061240  | cbln4            | 11  | 304  | 3,71 | 5,25E-04 |
| ENSDARG000000021255 | arhgap22         | 1   | 24   | 3,71 | 8,37E-06 |
| ENSDARG00000024032  | coch             | 4   | 93   | 3,68 | 1,56E-03 |
| ENSDARG00000026926  | rom1b            | 0   | 97   | 3,65 | 6,97E-05 |
| ENSDARG00000019658  | pou2f2a          | 5   | 87   | 3,64 | 2,41E-07 |
| ENSDARG00000078671  | cdk5r2b          | 7   | 105  | 3,62 | 6,70E-09 |
| ENSDARG00000037402  | lim2.3           | 2   | 34   | 3,61 | 3,78E-05 |
| ENSDARG00000102335  | ano1             | 9   | 153  | 3,61 | 2,21E-05 |
| ENSDARG00000035832  | pyyb             | 461 | 6393 | 3,59 | 6,52E-09 |
| ENSDARG00000003411  | foxa2            | 97  | 1192 | 3,58 | 9,91E-18 |
| ENSDARG00000036008  | caly             | 274 | 3688 | 3,58 | 1,55E-09 |
| ENSDARG00000070743  | tmem45a          | 9   | 124  | 3,57 | 1,21E-08 |
| ENSDARG00000011929  | plp1b            | 259 | 3370 | 3,57 | 1,46E-10 |
| ENSDARG00000056080  | si:dkey-191g9.5  | 2   | 42   | 3,56 | 6,11E-05 |
| ENSDARG00000036820  | mgll             | 5   | 72   | 3,56 | 3,12E-10 |
| ENSDARG00000074258  | gramd1bb         | 4   | 56   | 3,55 | 1,11E-08 |
| ENSDARG00000077811  | sox11a           | 13  | 171  | 3,54 | 4,05E-10 |
| ENSDARG00000104501  | FP236812.1       | 1   | 34   | 3,53 | 4,31E-04 |
| ENSDARG00000056922  | ltbp1            | 7   | 98   | 3,53 | 3,40E-07 |
| ENSDARG00000003615  | slc26a3.2        | 50  | 678  | 3,52 | 7,63E-08 |
| ENSDARG00000006151  | pde11a           | 3   | 67   | 3,52 | 2,99E-04 |
| ENSDARG00000062687  | kcnh7            | 17  | 226  | 3,51 | 1,34E-08 |
| ENSDARG00000099101  | gch2             | 153 | 2440 | 3,50 | 2,95E-05 |
| ENSDARG00000102398  | cnn1b            | 2   | 23   | 3,45 | 1,68E-06 |
| ENSDARG00000076052  | sez6l2           | 11  | 145  | 3,44 | 1,27E-07 |
| ENSDARG00000024101  | adra1d           | 9   | 129  | 3,42 | 8,75E-06 |
| ENSDARG00000112049  | cldn15a          | 1   | 23   | 3,41 | 1,62E-04 |
| ENSDARG00000070220  | pou3f2a          | 3   | 34   | 3,40 | 6,56E-07 |
| ENSDARG00000061692  | yjefn3           | 4   | 55   | 3,40 | 2,05E-06 |
| ENSDARG00000107441  | CABZ01063170.1   | 15  | 179  | 3,40 | 4,35E-09 |
| ENSDARG00000114852  | CR974456.1       | 2   | 29   | 3,40 | 2,76E-07 |
| ENSDARG00000030289  | jag1a            | 2   | 33   | 3,39 | 7,55E-07 |
| ENSDARG00000040280  | zgc:110182       | 5   | 80   | 3,39 | 9,09E-05 |
| ENSDARG00000068144  | nmba             | 7   | 127  | 3,38 | 5,48E-05 |
| ENSDARG00000075393  | spock2           | 1   | 26   | 3,38 | 8,76E-05 |
| ENSDARG00000061248  | xylt1            | 13  | 152  | 3,37 | 1,93E-08 |
| ENSDARG00000013343  | kif26ba          | 15  | 187  | 3,37 | 3,57E-07 |
| ENSDARG00000100594  | sez6l            | 11  | 140  | 3,37 | 3,34E-06 |
| ENSDARG00000007436  | avpr2aa          | 102 | 1276 | 3,36 | 1,34E-06 |
| ENSDARG00000062376  | nlgn3b           | 3   | 45   | 3,36 | 3,89E-06 |
| ENSDARG00000087646  | runx1            | 2   | 37   | 3,35 | 3,00E-04 |
| ENSDARG00000043406  | slc8a1b          | 3   | 40   | 3,35 | 5,62E-06 |
| ENSDARG00000025679  | comtb            | 14  | 161  | 3,35 | 1,51E-07 |
| ENSDARG00000095743  | sox11b           | 48  | 568  | 3,34 | 2,08E-07 |
| ENSDARG00000056519  | si:dkey-280e21.3 | 14  | 154  | 3,33 | 3,10E-09 |
| ENSDARG00000032795  | tmem8a           | 1   | 20   | 3,30 | 9,88E-05 |
| ENSDARG00000058371  | krt5             | 1   | 21   | 3,30 | 1,43E-03 |

|                     |                   |     |      |      |          |
|---------------------|-------------------|-----|------|------|----------|
| ENSDARG00000101534  | rab3db            | 38  | 392  | 3,30 | 4,96E-12 |
| ENSDARG00000098802  | map7d1a           | 2   | 20   | 3,29 | 1,70E-06 |
| ENSDARG00000053724  | adcyap1r1b        | 1   | 21   | 3,27 | 6,79E-06 |
| ENSDARG00000062277  | ppp2r2cb          | 2   | 27   | 3,27 | 7,03E-04 |
| ENSDARG00000115070  | si:dkeyp-74b6.2   | 29  | 320  | 3,26 | 2,40E-07 |
| ENSDARG00000079372  | si:ch211-264f5.6  | 27  | 289  | 3,25 | 6,70E-09 |
| ENSDARG00000056427  | auts2a            | 20  | 205  | 3,23 | 3,76E-10 |
| ENSDARG00000022660  | armac2            | 2   | 22   | 3,21 | 2,29E-04 |
| ENSDARG00000116062  | ADAM12 (1 of man  | 5   | 57   | 3,19 | 2,39E-05 |
| ENSDARG00000011821  | plod2             | 282 | 2665 | 3,17 | 6,82E-12 |
| ENSDARG00000074329  | arvcfa            | 25  | 302  | 3,16 | 2,03E-04 |
| ENSDARG00000101777  | pdlim5a           | 33  | 326  | 3,12 | 2,74E-07 |
| ENSDARG00000024654  | pgm3              | 306 | 2866 | 3,12 | 1,54E-09 |
| ENSDARG00000100426  | fam167b           | 9   | 90   | 3,12 | 1,18E-07 |
| ENSDARG00000018846  | dgat2             | 11  | 151  | 3,11 | 8,23E-04 |
| ENSDARG00000016551  | iqsec1b           | 121 | 1073 | 3,08 | 8,31E-13 |
| ENSDARG00000078241  | map7a             | 2   | 26   | 3,08 | 3,35E-05 |
| ENSDARG00000104480  | hcn1              | 15  | 148  | 3,06 | 9,85E-07 |
| ENSDARG00000056745  | necab2            | 35  | 347  | 3,06 | 7,49E-06 |
| ENSDARG00000069402  | lrrc4.1           | 6   | 57   | 3,03 | 2,60E-06 |
| ENSDARG00000102972  | CAB201075125.1    | 10  | 95   | 3,02 | 1,11E-05 |
| ENSDARG00000100900  | si:ch211-183d5.2  | 114 | 1602 | 3,00 | 5,20E-03 |
| ENSDARG00000062579  | kremen1           | 38  | 328  | 3,00 | 3,58E-09 |
| ENSDARG00000076294  | klb               | 138 | 1250 | 2,99 | 1,25E-06 |
| ENSDARG00000070972  | si:ch211-81a5.8   | 5   | 50   | 2,97 | 8,11E-05 |
| ENSDARG00000074183  | si:dkey-172j4.3   | 2   | 19   | 2,97 | 1,20E-03 |
| ENSDARG00000101422  | hdac12            | 4   | 40   | 2,96 | 3,09E-06 |
| ENSDARG00000013615  | pbx3b             | 89  | 724  | 2,96 | 4,32E-12 |
| ENSDARG00000034107  | actl6b            | 21  | 178  | 2,95 | 1,61E-07 |
| ENSDARG00000012694  | c3a.1             | 2   | 32   | 2,95 | 2,87E-03 |
| ENSDARG00000069752  | ckba              | 24  | 234  | 2,94 | 1,35E-04 |
| ENSDARG00000058206  | si:ch211-153b23.5 | 18  | 291  | 2,93 | 2,37E-03 |
| ENSDARG00000043843  | akap7             | 2   | 19   | 2,92 | 3,12E-04 |
| ENSDARG00000062720  | pcdh1a            | 5   | 45   | 2,92 | 1,01E-06 |
| ENSDARG00000095180  | abr               | 6   | 56   | 2,92 | 2,44E-06 |
| ENSDARG00000014420  | elavl3            | 5   | 53   | 2,92 | 3,95E-04 |
| ENSDARG00000016088  | rtn2a             | 2   | 25   | 2,92 | 2,40E-04 |
| ENSDARG00000053091  | si:ch211-204c21.1 | 17  | 147  | 2,91 | 3,68E-06 |
| ENSDARG00000087359  | c3a.2             | 11  | 153  | 2,91 | 4,90E-03 |
| ENSDARG00000003989  | crhr1             | 7   | 55   | 2,91 | 2,44E-08 |
| ENSDARG00000078123  | slitrk3a          | 9   | 113  | 2,91 | 1,26E-03 |
| ENSDARG00000094860  | gpr186            | 5   | 51   | 2,90 | 2,81E-05 |
| ENSDARG00000039828  | zp3b              | 27  | 207  | 2,88 | 4,07E-11 |
| ENSDARG00000075928  | hivp3a            | 28  | 222  | 2,88 | 9,18E-09 |
| ENSDARG00000062864  | gk5               | 13  | 104  | 2,87 | 5,96E-07 |
| ENSDARG00000033201  | zgc:101840        | 11  | 98   | 2,87 | 7,84E-05 |
| ENSDARG00000045834  | si:dkey-14d8.7    | 175 | 1653 | 2,87 | 3,61E-04 |
| ENSDARG00000074866  | ptpn5             | 59  | 443  | 2,87 | 1,21E-13 |
| ENSDARG00000071116  | eepd1             | 13  | 111  | 2,86 | 3,59E-06 |
| ENSDARG00000069928  | prkceb            | 77  | 571  | 2,85 | 1,44E-13 |
| ENSDARG000000027290 | nrp1b             | 58  | 456  | 2,85 | 8,87E-08 |
| ENSDARG000000007398 | lrrk1             | 38  | 304  | 2,85 | 8,60E-07 |
| ENSDARG00000009677  | dlg1              | 252 | 1892 | 2,83 | 8,90E-10 |
| ENSDARG00000075800  | calml4a           | 12  | 104  | 2,81 | 3,95E-04 |
| ENSDARG00000103396  | znf804b           | 3   | 24   | 2,81 | 8,24E-05 |
| ENSDARG00000034105  | mtus1b            | 77  | 582  | 2,78 | 7,29E-07 |
| ENSDARG00000091548  | stard9            | 7   | 53   | 2,77 | 5,44E-05 |
| ENSDARG00000078238  | nacc1b            | 3   | 27   | 2,77 | 3,58E-05 |
| ENSDARG00000059956  | ptk6b             | 10  | 89   | 2,77 | 1,05E-03 |
| ENSDARG00000063407  | ADAMTSL4          | 11  | 85   | 2,76 | 8,73E-07 |
| ENSDARG00000037030  | casz1             | 10  | 78   | 2,76 | 5,37E-06 |
| ENSDARG00000077710  | nlgn1             | 29  | 208  | 2,75 | 2,96E-09 |
| ENSDARG00000089382  | zgc:158463        | 336 | 2919 | 2,75 | 7,10E-04 |
| ENSDARG00000089640  | si:dkey-117n7.5   | 5   | 38   | 2,75 | 7,15E-05 |
| ENSDARG00000105184  | nbeab             | 17  | 133  | 2,75 | 8,37E-06 |

|                     |                   |      |       |      |          |
|---------------------|-------------------|------|-------|------|----------|
| ENSDARG00000006093  | cdk15             | 27   | 194   | 2,74 | 3,26E-07 |
| ENSDARG00000032799  | kcnd2             | 47   | 340   | 2,74 | 8,81E-08 |
| ENSDARG00000098257  | pcdh15a           | 33   | 232   | 2,72 | 3,57E-08 |
| ENSDARG00000011618  | slc26a2           | 7    | 57    | 2,72 | 6,70E-05 |
| ENSDARG00000101629  | CABZ01079192.1    | 2    | 24    | 2,72 | 1,16E-03 |
| ENSDARG00000026098  | si:dkey-13a21.4   | 28   | 195   | 2,71 | 1,93E-08 |
| ENSDARG00000102594  | zgc:194627        | 2    | 28    | 2,71 | 3,05E-02 |
| ENSDARG00000114762  | CABZ01084131.1    | 9    | 65    | 2,71 | 3,67E-08 |
| ENSDARG00000044688  | dusp4             | 18   | 129   | 2,71 | 3,69E-08 |
| ENSDARG00000096327  | cd164l2           | 23   | 174   | 2,71 | 2,04E-05 |
| ENSDARG00000013721  | g6pca.2           | 11   | 86    | 2,70 | 2,67E-05 |
| ENSDARG00000045442  | cpb1              | 18   | 139   | 2,69 | 1,67E-04 |
| ENSDARG00000075793  | prex1             | 34   | 245   | 2,69 | 1,57E-06 |
| ENSDARG00000062693  | nrxn3b            | 13   | 95    | 2,69 | 3,49E-06 |
| ENSDARG00000051923  | ccnb1             | 2    | 24    | 2,69 | 1,44E-02 |
| ENSDARG00000089856  | cita              | 4    | 27    | 2,67 | 6,99E-05 |
| ENSDARG00000074184  | arhgap32b         | 66   | 437   | 2,67 | 1,19E-09 |
| ENSDARG00000035018  | thy1              | 14   | 98    | 2,66 | 1,18E-07 |
| ENSDARG00000063150  | nrxn2b            | 33   | 220   | 2,66 | 3,75E-09 |
| ENSDARG00000004246  | slit2             | 41   | 270   | 2,66 | 1,31E-09 |
| ENSDARG00000023062  | cyr61             | 16   | 114   | 2,66 | 6,63E-06 |
| ENSDARG00000068432  | si:dkey-56m19.5   | 17   | 115   | 2,65 | 2,37E-06 |
| ENSDARG00000003200  | foxm1             | 2    | 20    | 2,64 | 1,61E-02 |
| ENSDARG00000103754  | aspm              | 2    | 26    | 2,64 | 3,95E-02 |
| ENSDARG00000062590  | pleca             | 414  | 2654  | 2,63 | 3,57E-11 |
| ENSDARG00000000606  | dnah6             | 5    | 41    | 2,62 | 1,43E-03 |
| ENSDARG00000071021  | papss2a           | 4    | 30    | 2,62 | 8,37E-06 |
| ENSDARG00000011027  | fgfr1a            | 68   | 436   | 2,60 | 5,75E-08 |
| ENSDARG00000089009  | frmpd1b           | 63   | 404   | 2,60 | 2,54E-08 |
| ENSDARG00000029439  | atp2a2a           | 182  | 1158  | 2,59 | 2,44E-08 |
| ENSDARG00000087804  | tnfrsf11a         | 5    | 43    | 2,58 | 9,19E-03 |
| ENSDARG00000102153  | nrp1a             | 59   | 367   | 2,57 | 7,19E-09 |
| ENSDARG00000061976  | sema6bb           | 26   | 166   | 2,56 | 5,39E-07 |
| ENSDARG00000053431  | si:ch211-257p13.3 | 17   | 124   | 2,56 | 4,85E-04 |
| ENSDARG00000103071  | si:ch211-244c8.4  | 8    | 55    | 2,56 | 3,47E-05 |
| ENSDARG000000071493 | olfm3a            | 28   | 207   | 2,54 | 2,25E-03 |
| ENSDARG00000087753  | CR388166.1        | 3    | 23    | 2,54 | 2,31E-03 |
| ENSDARG00000071042  | cx28.8            | 26   | 163   | 2,54 | 7,95E-06 |
| ENSDARG00000089444  | omgb              | 4    | 31    | 2,54 | 1,15E-03 |
| ENSDARG00000098925  | prdm1b            | 18   | 120   | 2,53 | 2,38E-04 |
| ENSDARG00000075491  | si:ch211-26b3.4   | 11   | 67    | 2,52 | 7,86E-09 |
| ENSDARG00000037062  | dhh               | 2    | 19    | 2,52 | 4,84E-03 |
| ENSDARG00000074863  | si:dkey-112m2.1   | 2    | 25    | 2,50 | 1,60E-02 |
| ENSDARG00000053684  | aldob             | 4741 | 32356 | 2,50 | 8,84E-04 |
| ENSDARG00000040982  | fgf14             | 11   | 66    | 2,49 | 1,41E-07 |
| ENSDARG00000079962  | doc2d             | 86   | 528   | 2,49 | 6,98E-06 |
| ENSDARG00000026165  | col11a1a          | 7    | 56    | 2,49 | 5,53E-03 |
| ENSDARG00000033327  | unc5b             | 12   | 76    | 2,48 | 7,26E-05 |
| ENSDARG00000069692  | col7a1l           | 18   | 111   | 2,48 | 8,98E-05 |
| ENSDARG00000043137  | cdca8             | 3    | 26    | 2,47 | 4,85E-02 |
| ENSDARG00000039453  | dhrr7ca           | 8    | 56    | 2,46 | 2,31E-03 |
| ENSDARG00000097652  | si:dkey-234i14.2  | 26   | 162   | 2,46 | 2,33E-04 |
| ENSDARG00000076174  | trim2b            | 11   | 66    | 2,45 | 1,25E-05 |
| ENSDARG00000019396  | regla             | 2    | 19    | 2,45 | 1,25E-02 |
| ENSDARG00000087094  | foxa              | 21   | 127   | 2,44 | 4,30E-06 |
| ENSDARG00000004169  | stmn1a            | 17   | 165   | 2,44 | 3,99E-02 |
| ENSDARG00000014804  | cacna2d1a         | 3    | 19    | 2,44 | 1,12E-03 |
| ENSDARG00000002403  | nusap1            | 5    | 37    | 2,44 | 1,87E-02 |
| ENSDARG00000078888  | iqgap1            | 32   | 198   | 2,43 | 1,86E-04 |
| ENSDARG00000098191  | si:dkey-16l2.20   | 3    | 21    | 2,43 | 1,70E-02 |
| ENSDARG00000001559  | csmd2             | 11   | 67    | 2,43 | 1,01E-04 |
| ENSDARG00000041006  | st3gal4           | 75   | 429   | 2,43 | 1,29E-07 |
| ENSDARG00000042833  | rffl              | 82   | 458   | 2,43 | 1,75E-09 |
| ENSDARG00000104732  | mlycd             | 7    | 42    | 2,42 | 1,77E-05 |
| ENSDARG00000075718  | rpz5              | 6    | 47    | 2,42 | 6,65E-03 |

|                    |                   |      |      |      |          |
|--------------------|-------------------|------|------|------|----------|
| ENSDARG00000078908 | fbxo41            | 8    | 45   | 2,41 | 1,35E-07 |
| ENSDARG00000071498 | fh1a              | 4    | 34   | 2,41 | 1,72E-02 |
| ENSDARG00000011824 | pbxip1b           | 522  | 2814 | 2,40 | 1,82E-12 |
| ENSDARG00000062325 | shank2            | 17   | 96   | 2,40 | 3,85E-08 |
| ENSDARG00000079771 | pea15             | 13   | 76   | 2,39 | 1,44E-05 |
| ENSDARG00000069946 | itga6b            | 553  | 3195 | 2,39 | 4,06E-05 |
| ENSDARG00000012968 | rhoub             | 15   | 94   | 2,39 | 1,78E-03 |
| ENSDARG00000062045 | il1rapl1a         | 96   | 514  | 2,37 | 3,23E-10 |
| ENSDARG00000102824 | pcdh10b           | 3    | 21   | 2,37 | 9,22E-04 |
| ENSDARG00000079479 | gpr4              | 30   | 167  | 2,37 | 3,45E-05 |
| ENSDARG00000098029 | si:ch211-129o18.4 | 11   | 65   | 2,37 | 1,10E-04 |
| ENSDARG00000116871 | BX284638.1        | 3    | 21   | 2,36 | 1,00E-03 |
| ENSDARG00000061196 | emilin2a          | 2    | 18   | 2,36 | 3,15E-02 |
| ENSDARG00000024488 | top2a             | 7    | 58   | 2,36 | 4,36E-02 |
| ENSDARG00000100498 | CABZ01079251.1    | 34   | 180  | 2,35 | 6,21E-08 |
| ENSDARG00000077073 | tanc1a            | 5    | 35   | 2,35 | 2,60E-03 |
| ENSDARG00000076496 | frmd4bb           | 18   | 95   | 2,34 | 1,03E-06 |
| ENSDARG00000102584 | cpne7             | 22   | 134  | 2,33 | 2,60E-03 |
| ENSDARG00000020929 | fam49ba           | 5    | 26   | 2,32 | 1,68E-04 |
| ENSDARG00000060243 | enox1             | 24   | 128  | 2,32 | 6,39E-07 |
| ENSDARG00000090230 | tmem108           | 5    | 25   | 2,31 | 2,23E-04 |
| ENSDARG00000006456 | pdgfrl            | 189  | 1015 | 2,30 | 2,95E-05 |
| ENSDARG00000024365 | crlf1a            | 14   | 74   | 2,30 | 6,79E-06 |
| ENSDARG00000033683 | tpma              | 3    | 20   | 2,30 | 1,47E-02 |
| ENSDARG00000001634 | kirrel1a          | 8    | 41   | 2,30 | 8,80E-06 |
| ENSDARG00000038066 | kpna2             | 17   | 122  | 2,30 | 3,30E-02 |
| ENSDARG00000039657 | fank1             | 4    | 28   | 2,30 | 1,28E-02 |
| ENSDARG00000103503 | dgat1a            | 18   | 94   | 2,30 | 5,97E-08 |
| ENSDARG00000069111 | IKZF2             | 3    | 19   | 2,30 | 1,43E-03 |
| ENSDARG00000006832 | galnt9            | 5    | 27   | 2,29 | 1,81E-03 |
| ENSDARG00000070656 | si:ch211-69g19.2  | 5    | 34   | 2,29 | 4,06E-02 |
| ENSDARG00000099038 | kcng1             | 8    | 45   | 2,29 | 3,24E-03 |
| ENSDARG00000028507 | itgb4             | 28   | 152  | 2,28 | 1,42E-04 |
| ENSDARG00000091956 | tmem184bb         | 4    | 22   | 2,28 | 1,48E-03 |
| ENSDARG00000104295 | arhgap21a         | 56   | 277  | 2,28 | 3,45E-10 |
| ENSDARG00000069407 | zgc:194990        | 421  | 2162 | 2,27 | 3,50E-06 |
| ENSDARG00000088862 | stxbp6            | 83   | 427  | 2,27 | 1,12E-05 |
| ENSDARG00000033655 | stmn1b            | 163  | 880  | 2,25 | 8,68E-04 |
| ENSDARG00000001803 | kcnh6a            | 158  | 770  | 2,25 | 2,29E-10 |
| ENSDARG00000018653 | acot7             | 3    | 18   | 2,25 | 1,93E-03 |
| ENSDARG00000036107 | txnipa            | 1330 | 6702 | 2,24 | 6,20E-06 |
| ENSDARG00000034168 | serpini1          | 63   | 315  | 2,24 | 5,65E-06 |
| ENSDARG00000100307 | adamts5           | 4    | 23   | 2,24 | 8,45E-05 |
| ENSDARG00000055752 | npas4a            | 159  | 814  | 2,24 | 6,94E-05 |
| ENSDARG00000095458 | si:dkey-240h12.3  | 70   | 363  | 2,24 | 1,36E-04 |
| ENSDARG00000101911 | si:dkeyp-86d6.2   | 8    | 42   | 2,23 | 1,25E-04 |
| ENSDARG00000077367 | ntng2a            | 17   | 96   | 2,23 | 2,25E-03 |
| ENSDARG00000100313 | pip5k1cb          | 33   | 165  | 2,22 | 4,26E-05 |
| ENSDARG00000087704 | gfra3             | 9    | 49   | 2,21 | 7,79E-03 |
| ENSDARG00000059809 | caska             | 16   | 77   | 2,21 | 1,46E-06 |
| ENSDARG00000037640 | aurkb             | 5    | 36   | 2,19 | 4,09E-02 |
| ENSDARG00000016454 | esr2a             | 15   | 75   | 2,19 | 5,62E-04 |
| ENSDARG00000057833 | gulp1b            | 5    | 35   | 2,18 | 1,28E-02 |
| ENSDARG00000103679 | bmp16             | 3    | 23   | 2,17 | 1,84E-02 |
| ENSDARG00000092169 | si:dkey-250k15.4  | 5    | 26   | 2,17 | 2,48E-03 |
| ENSDARG00000026482 | arhgap12b         | 151  | 697  | 2,17 | 6,70E-09 |
| ENSDARG00000071823 | adarb2            | 17   | 88   | 2,16 | 2,98E-03 |
| ENSDARG00000016139 | mkks              | 5    | 24   | 2,16 | 2,34E-04 |
| ENSDARG00000017038 | zgc:152670        | 4    | 22   | 2,16 | 4,32E-03 |
| ENSDARG00000077761 | nlgn4b            | 22   | 115  | 2,16 | 2,56E-03 |
| ENSDARG00000013310 | map3k15           | 7    | 50   | 2,15 | 1,31E-02 |
| ENSDARG00000076534 | si:ch211-14a17.10 | 9    | 42   | 2,15 | 4,83E-05 |
| ENSDARG00000014646 | aoc2              | 285  | 1529 | 2,15 | 7,52E-03 |
| ENSDARG00000043746 | nrxn3a            | 64   | 294  | 2,15 | 1,15E-07 |
| ENSDARG00000079850 | dchs1b            | 4    | 21   | 2,15 | 2,15E-02 |

|                    |                  |     |      |      |          |
|--------------------|------------------|-----|------|------|----------|
| ENSDARG00000058117 | snap25b          | 163 | 763  | 2,14 | 1,59E-05 |
| ENSDARG00000045568 | bcat1            | 65  | 300  | 2,14 | 2,09E-06 |
| ENSDARG00000116442 | FAM46A           | 158 | 753  | 2,14 | 1,10E-04 |
| ENSDARG00000007149 | l1cama           | 46  | 223  | 2,13 | 2,87E-04 |
| ENSDARG00000075562 | si:ch211-119o8.4 | 8   | 38   | 2,12 | 1,01E-03 |
| ENSDARG00000045878 | nudt4b           | 19  | 90   | 2,12 | 1,71E-04 |
| ENSDARG00000007856 | rtn4rl1a         | 7   | 35   | 2,11 | 3,67E-05 |
| ENSDARG00000023578 | lpp              | 87  | 429  | 2,11 | 2,95E-03 |
| ENSDARG00000060113 | znf395a          | 333 | 1517 | 2,11 | 1,10E-05 |
| ENSDARG00000068468 | dnah3            | 4   | 22   | 2,11 | 3,30E-02 |
| ENSDARG00000035895 | fnhc5b           | 175 | 803  | 2,10 | 5,46E-05 |
| ENSDARG00000100019 | arhgap11a        | 4   | 21   | 2,10 | 1,80E-02 |
| ENSDARG00000104326 | si:dkey-183i3.9  | 213 | 979  | 2,10 | 6,73E-05 |
| ENSDARG00000055592 | capn2b           | 4   | 19   | 2,09 | 8,54E-03 |
| ENSDARG00000068461 | zgc:162939       | 128 | 562  | 2,09 | 2,41E-08 |
| ENSDARG00000062056 | elmod1           | 44  | 191  | 2,09 | 5,43E-09 |
| ENSDARG00000101812 | zgc:114120       | 5   | 24   | 2,08 | 4,69E-03 |
| ENSDARG00000075621 | birc5a           | 4   | 21   | 2,08 | 3,36E-02 |
| ENSDARG00000074443 | gas7a            | 29  | 141  | 2,08 | 2,81E-03 |
| ENSDARG00000103746 | mapkbp1          | 11  | 48   | 2,08 | 1,89E-05 |
| ENSDARG00000042151 | skia             | 15  | 66   | 2,08 | 1,46E-05 |
| ENSDARG00000091726 | aebp1            | 2   | 26   | 2,08 | 7,95E-03 |
| ENSDARG00000071375 | celf5a           | 60  | 258  | 2,07 | 9,13E-08 |
| ENSDARG00000061899 | iqub             | 6   | 34   | 2,07 | 4,67E-02 |
| ENSDARG00000063007 | apc2             | 65  | 284  | 2,06 | 8,99E-08 |
| ENSDARG00000087916 | tmem240a         | 23  | 102  | 2,06 | 2,21E-08 |
| ENSDARG00000030411 | crygn2           | 5   | 22   | 2,06 | 7,28E-04 |
| ENSDARG00000058666 | dennd2da         | 28  | 126  | 2,06 | 2,29E-04 |
| ENSDARG00000054177 | adgra1a          | 10  | 44   | 2,04 | 1,08E-03 |
| ENSDARG00000014302 | brinp2           | 34  | 150  | 2,04 | 1,26E-04 |
| ENSDARG00000097691 | pclaf            | 4   | 18   | 2,04 | 1,09E-03 |
| ENSDARG00000102975 | nsg2             | 652 | 2776 | 2,04 | 6,38E-07 |
| ENSDARG00000073952 | slc4a7           | 131 | 562  | 2,03 | 6,55E-06 |
| ENSDARG00000016868 | rhobtb2a         | 132 | 560  | 2,03 | 3,43E-07 |
| ENSDARG00000090035 | rtn4r            | 32  | 140  | 2,03 | 1,69E-04 |
| ENSDARG00000044167 | padi2            | 35  | 148  | 2,03 | 7,53E-08 |
| ENSDARG00000021806 | zfp36l2          | 30  | 134  | 2,02 | 6,45E-04 |
| ENSDARG00000020702 | odf2b            | 6   | 26   | 2,02 | 8,02E-04 |
| ENSDARG00000104296 | zgc:165508       | 69  | 304  | 2,02 | 2,34E-04 |
| ENSDARG00000018149 | slc38a4          | 11  | 50   | 2,02 | 5,00E-03 |
| ENSDARG00000010654 | arhgap42b        | 39  | 165  | 2,02 | 2,95E-05 |
| ENSDARG00000114589 | jam3a            | 158 | 655  | 2,01 | 3,02E-08 |
| ENSDARG00000004451 | tnfrsfa          | 24  | 104  | 2,01 | 5,59E-04 |
| ENSDARG00000045371 | prdm14           | 10  | 46   | 2,01 | 9,18E-03 |
| ENSDARG00000079622 | frmd5            | 5   | 22   | 2,01 | 7,67E-03 |
| ENSDARG00000025034 | syng3b           | 546 | 2234 | 2,00 | 2,36E-09 |
| ENSDARG00000104713 | zgc:165653       | 4   | 19   | 2,00 | 2,42E-02 |
| ENSDARG00000086838 | itga2.3          | 10  | 46   | 2,00 | 2,68E-03 |
| ENSDARG00000068624 | si:dkey-27p18.5  | 5   | 21   | 2,00 | 2,13E-03 |
| ENSDARG00000000906 | skap2            | 6   | 32   | 2,00 | 4,36E-02 |
| ENSDARG00000016404 | ptch1            | 10  | 46   | 1,99 | 4,91E-04 |
| ENSDARG00000058369 | mex3b            | 18  | 78   | 1,99 | 3,58E-05 |
| ENSDARG00000079484 | kcnt1            | 3   | 20   | 1,99 | 2,65E-02 |
| ENSDARG00000006044 | ust              | 7   | 35   | 1,99 | 3,84E-02 |
| ENSDARG00000011407 | col2a1b          | 11  | 52   | 1,98 | 1,04E-02 |
| ENSDARG00000059746 | plod1a           | 8   | 38   | 1,98 | 6,78E-03 |
| ENSDARG00000006983 | celf3b           | 86  | 350  | 1,98 | 4,14E-07 |
| ENSDARG00000036082 | tph1b            | 6   | 28   | 1,98 | 2,44E-04 |
| ENSDARG00000091061 | slc38a3b         | 78  | 332  | 1,97 | 8,46E-04 |
| ENSDARG00000001889 | tuba1a           | 31  | 127  | 1,97 | 2,83E-06 |
| ENSDARG00000037393 | slc43a1a         | 17  | 76   | 1,97 | 3,12E-03 |
| ENSDARG00000060610 | pcdh7b           | 8   | 42   | 1,97 | 4,53E-02 |
| ENSDARG00000035715 | marcks11b        | 62  | 278  | 1,96 | 8,98E-03 |
| ENSDARG00000046140 | zgc:112038       | 7   | 30   | 1,96 | 4,08E-03 |
| ENSDARG00000043241 | arrb1            | 5   | 23   | 1,96 | 2,15E-03 |

|                     |                    |      |       |      |          |
|---------------------|--------------------|------|-------|------|----------|
| ENSDARG00000009493  | MAP3K13            | 39   | 164   | 1,96 | 5,10E-04 |
| ENSDARG00000035338  | tppp2              | 18   | 73    | 1,95 | 1,99E-05 |
| ENSDARG000000088195 | si:ch211-168f7.5   | 10   | 42    | 1,95 | 4,34E-04 |
| ENSDARG00000013441  | hey2               | 7    | 34    | 1,94 | 2,13E-02 |
| ENSDARG00000070012  | sesn2              | 90   | 361   | 1,94 | 3,90E-06 |
| ENSDARG00000054911  | tmsb               | 11   | 47    | 1,94 | 4,70E-03 |
| ENSDARG00000105034  | zdhhc18b           | 4    | 17    | 1,94 | 7,72E-03 |
| ENSDARG00000059815  | oaz2b              | 42   | 171   | 1,93 | 1,98E-04 |
| ENSDARG00000059747  | kcnj19a            | 245  | 985   | 1,93 | 6,70E-05 |
| ENSDARG00000090876  | si:dkey-217f16.5   | 5    | 22    | 1,92 | 6,45E-04 |
| ENSDARG00000030107  | si:ch211-207i1.2   | 76   | 302   | 1,91 | 8,77E-05 |
| ENSDARG00000025024  | pnoca              | 4626 | 18846 | 1,91 | 1,01E-03 |
| ENSDARG00000036968  | si:ch1073-416d2.3  | 217  | 893   | 1,91 | 2,04E-03 |
| ENSDARG00000098511  | ntrk2b             | 5    | 19    | 1,91 | 3,03E-03 |
| ENSDARG00000076386  | epdl1              | 516  | 2098  | 1,90 | 1,42E-03 |
| ENSDARG00000101482  | hk2                | 8    | 33    | 1,90 | 4,78E-03 |
| ENSDARG00000105529  | vgf                | 4    | 17    | 1,90 | 1,38E-02 |
| ENSDARG00000045804  | abhd2b             | 28   | 113   | 1,90 | 1,94E-03 |
| ENSDARG00000114948  | zgc:194551         | 6    | 28    | 1,89 | 3,96E-02 |
| ENSDARG00000090646  | tnk2a              | 73   | 279   | 1,88 | 2,19E-07 |
| ENSDARG00000069430  | tp53i11a           | 8    | 35    | 1,88 | 3,76E-03 |
| ENSDARG00000103156  | gpc6a              | 34   | 132   | 1,88 | 2,95E-05 |
| ENSDARG00000102051  | mtbl               | 384  | 1465  | 1,88 | 8,67E-06 |
| ENSDARG00000103056  | itga4              | 4    | 20    | 1,88 | 3,94E-02 |
| ENSDARG00000034443  | mpped2             | 273  | 1029  | 1,88 | 1,28E-07 |
| ENSDARG00000089172  | si:ch1073-391i24.1 | 31   | 122   | 1,87 | 1,42E-03 |
| ENSDARG00000021086  | znf367             | 11   | 49    | 1,87 | 2,09E-02 |
| ENSDARG00000104841  | CABZ01015475.1     | 8    | 32    | 1,86 | 2,55E-03 |
| ENSDARG00000097855  | C2orf88            | 7    | 30    | 1,86 | 2,52E-02 |
| ENSDARG00000020956  | pck2               | 23   | 86    | 1,85 | 6,18E-06 |
| ENSDARG00000077569  | lrrn3a             | 49   | 183   | 1,85 | 1,24E-05 |
| ENSDARG00000037603  | zgc:162144         | 10   | 42    | 1,85 | 4,02E-02 |
| ENSDARG00000075158  | igdcc3             | 20   | 76    | 1,84 | 1,16E-03 |
| ENSDARG00000079166  | ace                | 365  | 1440  | 1,84 | 5,50E-03 |
| ENSDARG00000090607  | si:dkeyp-117b11.1  | 54   | 216   | 1,83 | 9,01E-03 |
| ENSDARG00000023683  | cacna1fb           | 35   | 138   | 1,83 | 3,76E-03 |
| ENSDARG00000043446  | efhd1              | 18   | 72    | 1,82 | 3,00E-03 |
| ENSDARG00000101178  | sh3rf2             | 31   | 114   | 1,82 | 1,02E-04 |
| ENSDARG00000044056  | ahi1               | 105  | 378   | 1,82 | 5,32E-09 |
| ENSDARG00000087299  | armac9             | 26   | 98    | 1,82 | 2,74E-06 |
| ENSDARG00000029431  | si:ch211-147k10.5  | 5    | 23    | 1,82 | 4,90E-02 |
| ENSDARG00000018270  | olfm1a             | 35   | 129   | 1,82 | 1,29E-04 |
| ENSDARG00000002731  | sdca2              | 646  | 2319  | 1,81 | 3,69E-08 |
| ENSDARG00000037495  | rtn4rl2b           | 1856 | 7174  | 1,81 | 4,59E-03 |
| ENSDARG00000092310  | si:ch211-199g17.2  | 7    | 29    | 1,81 | 8,77E-03 |
| ENSDARG00000100851  | gphnb              | 105  | 376   | 1,81 | 7,93E-08 |
| ENSDARG00000074149  | itpr1b             | 214  | 775   | 1,80 | 1,59E-05 |
| ENSDARG00000061600  | tmem2              | 23   | 83    | 1,80 | 7,08E-06 |
| ENSDARG00000069006  | tle3b              | 76   | 271   | 1,80 | 6,38E-06 |
| ENSDARG00000040907  | gcgb               | 1785 | 7351  | 1,79 | 3,93E-02 |
| ENSDARG00000063417  | erf                | 80   | 282   | 1,79 | 5,48E-07 |
| ENSDARG00000042368  | kif26aa            | 18   | 69    | 1,79 | 1,88E-03 |
| ENSDARG00000035859  | angptl4            | 1126 | 4075  | 1,78 | 2,38E-04 |
| ENSDARG00000073944  | si:ch73-386h18.1   | 232  | 818   | 1,78 | 3,58E-07 |
| ENSDARG00000019417  | gadd45ga           | 1070 | 3960  | 1,78 | 2,26E-03 |
| ENSDARG00000113771  | GRIK2              | 143  | 502   | 1,77 | 2,81E-06 |
| ENSDARG00000054448  | kif1c              | 19   | 68    | 1,77 | 1,20E-03 |
| ENSDARG00000067859  | scospondin         | 6    | 23    | 1,77 | 1,34E-02 |
| ENSDARG00000005464  | dnase1l1           | 38   | 135   | 1,77 | 7,05E-05 |
| ENSDARG00000060103  | cpeb3              | 68   | 241   | 1,77 | 1,42E-04 |
| ENSDARG00000079946  | sqlea              | 8    | 30    | 1,76 | 3,55E-02 |
| ENSDARG00000036446  | PRKAR2B            | 6    | 22    | 1,76 | 1,64E-02 |
| ENSDARG00000088593  | chst1              | 22   | 81    | 1,76 | 2,11E-03 |
| ENSDARG00000008186  | syk                | 43   | 151   | 1,76 | 6,20E-06 |
| ENSDARG00000052468  | GSK3B (1 of many)  | 56   | 197   | 1,76 | 1,02E-04 |

|                     |                  |      |      |      |          |
|---------------------|------------------|------|------|------|----------|
| ENSDARG00000094994  | si:dkey-106c17.2 | 8    | 28   | 1,74 | 7,51E-03 |
| ENSDARG00000007912  | si:ch211-196i2.1 | 9    | 32   | 1,74 | 6,48E-03 |
| ENSDARG00000056530  | cpamd8           | 2    | 21   | 1,73 | 3,05E-02 |
| ENSDARG00000044362  | unc119b          | 27   | 93   | 1,73 | 5,94E-04 |
| ENSDARG00000043131  | BX664625.1       | 13   | 46   | 1,73 | 3,33E-03 |
| ENSDARG00000038822  | mrc1b            | 15   | 55   | 1,73 | 2,53E-02 |
| ENSDARG00000001950  | ak1              | 6    | 22   | 1,73 | 2,75E-02 |
| ENSDARG00000028661  | cntfr            | 31   | 108  | 1,72 | 1,78E-03 |
| ENSDARG00000099096  | gabrb4           | 35   | 123  | 1,72 | 3,98E-04 |
| ENSDARG00000023302  | gpbar1           | 36   | 129  | 1,71 | 1,25E-02 |
| ENSDARG00000045803  | mfge8b           | 1121 | 3813 | 1,71 | 8,71E-05 |
| ENSDARG00000052020  | cmtm4            | 95   | 321  | 1,71 | 1,32E-06 |
| ENSDARG00000044808  | slc4a4b          | 24   | 87   | 1,71 | 1,16E-02 |
| ENSDARG00000006878  | phf21aa          | 58   | 193  | 1,71 | 2,13E-08 |
| ENSDARG00000027063  | arpc1b           | 19   | 67   | 1,71 | 4,68E-03 |
| ENSDARG00000025522  | sgk1             | 74   | 269  | 1,71 | 1,33E-02 |
| ENSDARG00000086490  | si:dkey-92f12.2  | 14   | 48   | 1,70 | 9,90E-04 |
| ENSDARG00000056797  | ppp2r2ca         | 6    | 20   | 1,70 | 4,26E-03 |
| ENSDARG000000078781 | si:ch211-161c3.6 | 8    | 31   | 1,70 | 2,13E-02 |
| ENSDARG000000017710 | ppp1r14ab        | 15   | 53   | 1,70 | 2,31E-02 |
| ENSDARG00000088100  | KCNIP4           | 90   | 306  | 1,69 | 1,30E-03 |
| ENSDARG00000071410  | cks2             | 8    | 28   | 1,69 | 3,14E-02 |
| ENSDARG00000058100  | b3gnt3           | 169  | 555  | 1,68 | 4,47E-06 |
| ENSDARG00000092199  | si:ch211-250c4.4 | 217  | 755  | 1,68 | 6,85E-03 |
| ENSDARG00000021539  | ephb2b           | 111  | 365  | 1,68 | 1,77E-06 |
| ENSDARG00000010823  | memo1            | 188  | 608  | 1,68 | 1,25E-09 |
| ENSDARG000000112961 | LO017848.1       | 15   | 49   | 1,67 | 2,27E-03 |
| ENSDARG00000075222  | amer2            | 11   | 37   | 1,67 | 7,05E-03 |
| ENSDARG00000060678  | ndst2b           | 84   | 278  | 1,67 | 1,14E-04 |
| ENSDARG000000104222 | inpp1a           | 41   | 134  | 1,66 | 1,26E-04 |
| ENSDARG00000098526  | gpr75            | 76   | 250  | 1,66 | 2,39E-05 |
| ENSDARG00000056541  | nr0b1            | 60   | 206  | 1,66 | 6,42E-03 |
| ENSDARG00000006601  | kaznb            | 25   | 83   | 1,66 | 1,02E-04 |
| ENSDARG00000059801  | pdzd2            | 97   | 317  | 1,66 | 4,64E-05 |
| ENSDARG00000095826  | smdt1a           | 8    | 26   | 1,66 | 6,36E-03 |
| ENSDARG000000017929 | ncoa2            | 746  | 2399 | 1,65 | 4,04E-06 |
| ENSDARG00000076943  | lhfp14b          | 32   | 104  | 1,65 | 5,07E-05 |
| ENSDARG00000096637  | si:dkey-11c5.11  | 54   | 178  | 1,65 | 1,30E-03 |
| ENSDARG00000060372  | plxna2           | 17   | 58   | 1,65 | 8,98E-03 |
| ENSDARG00000098880  | pclob            | 697  | 2212 | 1,64 | 1,84E-06 |
| ENSDARG00000035918  | bzw2             | 20   | 64   | 1,64 | 4,77E-04 |
| ENSDARG00000027602  | lrfn1            | 19   | 65   | 1,63 | 7,00E-03 |
| ENSDARG000000100020 | pim1             | 391  | 1238 | 1,63 | 4,09E-06 |
| ENSDARG00000038574  | scg2b            | 2763 | 8742 | 1,63 | 2,83E-06 |
| ENSDARG00000004871  | mst1rb           | 401  | 1273 | 1,63 | 2,55E-05 |
| ENSDARG00000032369  | btbd6b           | 433  | 1364 | 1,62 | 3,42E-06 |
| ENSDARG00000093081  | si:ch73-92i20.1  | 32   | 106  | 1,62 | 1,22E-02 |
| ENSDARG00000087822  | agap3            | 42   | 132  | 1,62 | 1,17E-05 |
| ENSDARG00000099752  | si:dkey-19b23.7  | 50   | 160  | 1,62 | 3,02E-04 |
| ENSDARG00000076025  | dgkzb            | 19   | 64   | 1,61 | 2,75E-02 |
| ENSDARG000000014680 | znf710a          | 6    | 22   | 1,60 | 4,56E-02 |
| ENSDARG000000000161 | itsn2a           | 27   | 83   | 1,60 | 2,82E-05 |
| ENSDARG00000059616  | hs3st2           | 21   | 69   | 1,60 | 1,57E-02 |
| ENSDARG00000070338  | hoxc4a           | 18   | 60   | 1,59 | 2,91E-02 |
| ENSDARG00000053452  | pop5             | 19   | 59   | 1,59 | 2,35E-05 |
| ENSDARG00000061371  | cdh18a           | 42   | 132  | 1,59 | 2,33E-03 |
| ENSDARG00000099079  | aclya            | 733  | 2254 | 1,59 | 9,38E-06 |
| ENSDARG00000071009  | kif20ba          | 86   | 278  | 1,59 | 7,41E-03 |
| ENSDARG00000006522  | otop2            | 19   | 61   | 1,59 | 1,33E-02 |
| ENSDARG00000073866  | tdp1             | 51   | 162  | 1,59 | 4,31E-03 |
| ENSDARG00000022254  | prkcbb           | 170  | 541  | 1,58 | 4,59E-03 |
| ENSDARG00000014939  | KCNN2            | 8    | 26   | 1,57 | 2,35E-02 |
| ENSDARG00000055585  | c1galt1a         | 22   | 70   | 1,57 | 6,82E-03 |
| ENSDARG00000006474  | saxo2            | 13   | 43   | 1,57 | 1,78E-02 |
| ENSDARG00000027724  | dgkb             | 31   | 100  | 1,57 | 8,88E-03 |

|                     |                   |      |      |      |          |
|---------------------|-------------------|------|------|------|----------|
| ENSDARG00000056156  | npdc1b            | 191  | 578  | 1,57 | 1,67E-06 |
| ENSDARG00000091342  | adcy5             | 170  | 512  | 1,57 | 4,02E-06 |
| ENSDARG00000098852  | smdt1b            | 63   | 198  | 1,57 | 6,48E-03 |
| ENSDARG00000088083  | sik3              | 66   | 210  | 1,56 | 1,06E-02 |
| ENSDARG00000069185  | celsr1a           | 130  | 389  | 1,56 | 1,84E-07 |
| ENSDARG00000090965  | ripk3             | 13   | 41   | 1,56 | 4,67E-03 |
| ENSDARG00000076998  | si:ch73-92i20.1   | 28   | 88   | 1,55 | 8,75E-03 |
| ENSDARG00000041616  | b3gnt9            | 10   | 33   | 1,55 | 2,53E-02 |
| ENSDARG00000058032  | si:dkey-6n6.2     | 22   | 69   | 1,54 | 1,25E-02 |
| ENSDARG00000071465  | lrrc39            | 7    | 20   | 1,54 | 1,12E-02 |
| ENSDARG00000077536  | snrnp200          | 458  | 1356 | 1,54 | 9,38E-06 |
| ENSDARG00000009607  | ccnc              | 366  | 1085 | 1,54 | 6,18E-06 |
| ENSDARG000000027183 | namptb            | 51   | 153  | 1,54 | 6,88E-04 |
| ENSDARG000000059202 | tspan2b           | 13   | 40   | 1,53 | 1,61E-02 |
| ENSDARG00000101606  | rims2a            | 2830 | 8484 | 1,53 | 8,16E-04 |
| ENSDARG00000114503  | phtf2             | 28   | 83   | 1,51 | 2,82E-03 |
| ENSDARG00000056572  | si:dkey-261i16.5  | 9    | 30   | 1,51 | 2,65E-02 |
| ENSDARG00000079741  | CSRN3             | 22   | 68   | 1,51 | 3,69E-03 |
| ENSDARG00000018750  | npr1b             | 20   | 61   | 1,50 | 3,34E-02 |
| ENSDARG00000010267  | dpydb             | 47   | 139  | 1,50 | 1,87E-03 |
| ENSDARG00000012914  | arhgef4           | 79   | 229  | 1,50 | 1,34E-04 |
| ENSDARG00000012078  | meis1b            | 693  | 2032 | 1,50 | 7,79E-04 |
| ENSDARG00000090326  | MAPK8IP1 (1 of ma | 55   | 161  | 1,50 | 1,03E-03 |
| ENSDARG00000063646  | lnpa              | 23   | 65   | 1,49 | 7,91E-05 |
| ENSDARG00000102899  | cremb             | 43   | 131  | 1,48 | 4,05E-02 |
| ENSDARG00000105083  | chd5              | 212  | 603  | 1,48 | 6,10E-07 |
| ENSDARG00000075850  | gnal2             | 207  | 602  | 1,48 | 2,55E-03 |
| ENSDARG00000028322  | pex14             | 214  | 605  | 1,48 | 7,79E-08 |
| ENSDARG00000027423  | igf1ra            | 82   | 240  | 1,48 | 3,41E-03 |
| ENSDARG00000034424  | atp1b2b           | 10   | 31   | 1,47 | 3,01E-02 |
| ENSDARG00000008912  | slc8a2a           | 17   | 48   | 1,47 | 6,37E-05 |
| ENSDARG00000027807  | frk               | 7    | 20   | 1,46 | 4,72E-02 |
| ENSDARG00000058646  | ptprna            | 3010 | 8419 | 1,46 | 2,45E-06 |
| ENSDARG00000091211  | adh8a             | 18   | 51   | 1,46 | 1,97E-02 |
| ENSDARG00000014053  | olfm1b            | 1131 | 3258 | 1,46 | 5,87E-03 |
| ENSDARG000000059729 | sec14l8           | 57   | 164  | 1,45 | 4,21E-03 |
| ENSDARG00000011600  | epha4b            | 212  | 596  | 1,45 | 3,76E-04 |
| ENSDARG00000033950  | lamb2l            | 49   | 139  | 1,45 | 3,80E-03 |
| ENSDARG00000023448  | galnt14           | 98   | 276  | 1,45 | 8,16E-04 |
| ENSDARG00000005626  | RHO (1 of many)   | 35   | 98   | 1,45 | 2,13E-06 |
| ENSDARG00000075188  | adamts10          | 10   | 28   | 1,45 | 3,19E-02 |
| ENSDARG00000027822  | tmtops2b          | 10   | 29   | 1,44 | 1,42E-02 |
| ENSDARG00000059587  | CU928117.1        | 28   | 79   | 1,44 | 1,64E-03 |
| ENSDARG00000074828  | si:dkey-263f15.2  | 9    | 26   | 1,44 | 3,94E-02 |
| ENSDARG00000016429  | farf2             | 94   | 263  | 1,44 | 1,75E-03 |
| ENSDARG00000112644  | CU459056.1        | 113  | 309  | 1,43 | 2,92E-05 |
| ENSDARG00000013841  | abl2              | 92   | 255  | 1,43 | 5,84E-04 |
| ENSDARG00000045301  | st8sia3           | 27   | 77   | 1,42 | 2,96E-03 |
| ENSDARG00000020080  | ek1               | 394  | 1120 | 1,42 | 2,29E-02 |
| ENSDARG00000063649  | tead3b            | 33   | 91   | 1,42 | 8,23E-04 |
| ENSDARG00000104574  | pcsk6             | 92   | 261  | 1,41 | 2,89E-02 |
| ENSDARG00000015002  | cdh4              | 106  | 287  | 1,41 | 6,72E-05 |
| ENSDARG00000075156  | tbc1d4            | 53   | 146  | 1,41 | 1,85E-03 |
| ENSDARG00000061255  | dup3a             | 41   | 114  | 1,41 | 3,54E-03 |
| ENSDARG00000104701  | map7d1b           | 62   | 168  | 1,40 | 3,06E-05 |
| ENSDARG00000061096  | dapk2a            | 67   | 187  | 1,40 | 1,17E-02 |
| ENSDARG00000069619  | atf7ip            | 281  | 747  | 1,40 | 3,75E-09 |
| ENSDARG00000102908  | il16              | 6    | 17   | 1,40 | 1,80E-02 |
| ENSDARG00000010610  | sarm1             | 34   | 95   | 1,39 | 2,23E-02 |
| ENSDARG00000095011  | si:ch211-67n3.9   | 25   | 67   | 1,39 | 1,22E-04 |
| ENSDARG00000022858  | wnt7ba            | 8    | 23   | 1,39 | 4,20E-02 |
| ENSDARG00000098368  | aplp1             | 53   | 144  | 1,39 | 6,85E-03 |
| ENSDARG00000095457  | si:ch211-147d7.5  | 28   | 77   | 1,38 | 2,79E-02 |
| ENSDARG00000061121  | adgrl3.1          | 138  | 366  | 1,38 | 3,21E-07 |
| ENSDARG00000018961  | gtpbp4            | 1020 | 2711 | 1,38 | 1,02E-04 |

|                     |                  |      |       |      |          |
|---------------------|------------------|------|-------|------|----------|
| ENSDARG00000018773  | hivep2b          | 9    | 25    | 1,38 | 4,67E-02 |
| ENSDARG00000062915  | polr3b           | 46   | 121   | 1,37 | 1,01E-04 |
| ENSDARG00000100422  | ptpro            | 10   | 27    | 1,37 | 2,69E-02 |
| ENSDARG00000075024  | si:ch73-375g18.1 | 100  | 271   | 1,37 | 9,94E-03 |
| ENSDARG00000075110  | dab2ipb          | 398  | 1047  | 1,37 | 6,11E-05 |
| ENSDARG00000087013  | cubn             | 6    | 16    | 1,37 | 3,64E-02 |
| ENSDARG00000057032  | ppm1nb           | 37   | 97    | 1,37 | 8,03E-04 |
| ENSDARG00000087616  | maptb            | 52   | 140   | 1,37 | 4,69E-03 |
| ENSDARG00000058421  | lgi1b            | 73   | 194   | 1,37 | 1,39E-03 |
| ENSDARG00000074447  | dapk3            | 84   | 219   | 1,36 | 1,68E-05 |
| ENSDARG00000078348  | tcf20            | 361  | 938   | 1,36 | 1,77E-06 |
| ENSDARG00000079468  | rhobtb1          | 28   | 76    | 1,36 | 6,51E-03 |
| ENSDARG00000090185  | si:dkeyp-73b11.8 | 16   | 43    | 1,36 | 2,92E-02 |
| ENSDARG00000076618  | tm2d3            | 107  | 280   | 1,36 | 8,11E-05 |
| ENSDARG00000077134  | gpr158a          | 629  | 1676  | 1,35 | 5,65E-03 |
| ENSDARG00000020387  | nipsnap3a        | 101  | 267   | 1,35 | 4,33E-03 |
| ENSDARG00000005343  | ccdc85a1         | 89   | 236   | 1,35 | 6,96E-03 |
| ENSDARG000000035132 | rgs3b            | 160  | 417   | 1,35 | 3,80E-04 |
| ENSDARG00000008983  | sh3glb2a         | 58   | 149   | 1,34 | 2,60E-04 |
| ENSDARG00000054837  | zgc:136870       | 51   | 134   | 1,33 | 1,37E-02 |
| ENSDARG00000061093  | phldb1a          | 41   | 109   | 1,33 | 1,07E-02 |
| ENSDARG00000022176  | IGLON5           | 77   | 200   | 1,32 | 2,98E-03 |
| ENSDARG00000062080  | shc2             | 11   | 29    | 1,32 | 4,85E-02 |
| ENSDARG00000060309  | srgap3           | 129  | 331   | 1,32 | 8,39E-04 |
| ENSDARG00000062485  | dock11           | 84   | 213   | 1,32 | 1,54E-04 |
| ENSDARG00000076005  | piezo2a.2        | 72   | 183   | 1,32 | 1,04E-04 |
| ENSDARG00000003635  | mogat3b          | 22   | 58    | 1,31 | 9,94E-03 |
| ENSDARG00000013649  | casr             | 322  | 820   | 1,31 | 2,13E-03 |
| ENSDARG00000018534  | slc6a9           | 16   | 43    | 1,31 | 3,68E-02 |
| ENSDARG00000102123  | phtf2            | 14   | 36    | 1,31 | 2,05E-02 |
| ENSDARG00000067626  | ywhag1           | 205  | 532   | 1,30 | 1,70E-02 |
| ENSDARG00000036774  | rgs12b           | 233  | 583   | 1,30 | 1,14E-07 |
| ENSDARG00000021309  | rhoca            | 59   | 148   | 1,30 | 9,12E-05 |
| ENSDARG00000060184  | pkn1a            | 99   | 247   | 1,30 | 9,19E-06 |
| ENSDARG000000088590 | pxna             | 15   | 38    | 1,30 | 1,31E-02 |
| ENSDARG00000036684  | ndufa7           | 170  | 431   | 1,29 | 5,34E-03 |
| ENSDARG00000035056  | fgf13a           | 25   | 65    | 1,29 | 3,90E-02 |
| ENSDARG00000077178  | zgc:152977       | 16   | 41    | 1,29 | 9,36E-03 |
| ENSDARG00000031756  | mef2aa           | 80   | 199   | 1,29 | 1,11E-03 |
| ENSDARG00000037961  | rcn3             | 262  | 657   | 1,29 | 2,13E-03 |
| ENSDARG00000077329  | nlgn2a           | 33   | 82    | 1,29 | 3,66E-03 |
| ENSDARG00000078404  | cdh26.1          | 12   | 30    | 1,28 | 3,31E-02 |
| ENSDARG00000015731  | ano5a            | 22   | 58    | 1,28 | 2,33E-02 |
| ENSDARG00000104387  | slc4a5           | 38   | 95    | 1,27 | 1,44E-02 |
| ENSDARG00000105782  | CABZ01081777.1   | 32   | 78    | 1,27 | 3,74E-04 |
| ENSDARG00000020000  | sh3bp4a          | 89   | 222   | 1,27 | 4,06E-03 |
| ENSDARG00000023916  | phactr1          | 34   | 86    | 1,27 | 3,97E-03 |
| ENSDARG00000058606  | sik1             | 3418 | 8400  | 1,27 | 1,28E-03 |
| ENSDARG00000033599  | zgc:100906       | 85   | 207   | 1,26 | 1,40E-03 |
| ENSDARG00000071026  | mllt11           | 176  | 433   | 1,25 | 5,49E-03 |
| ENSDARG000000004251 | dhfr             | 10   | 26    | 1,25 | 2,76E-02 |
| ENSDARG00000099257  | si:ch73-119p20.1 | 117  | 284   | 1,24 | 8,21E-04 |
| ENSDARG00000104571  | gadd45ab         | 86   | 209   | 1,24 | 5,20E-03 |
| ENSDARG00000006899  | far1             | 109  | 259   | 1,24 | 2,44E-05 |
| ENSDARG00000032868  | pde4ba           | 576  | 1370  | 1,23 | 1,14E-04 |
| ENSDARG00000061732  | raph1b           | 117  | 280   | 1,23 | 4,66E-04 |
| ENSDARG00000092722  | unc5da           | 52   | 126   | 1,23 | 1,35E-02 |
| ENSDARG00000075849  | prrr12b          | 134  | 318   | 1,22 | 2,85E-05 |
| ENSDARG00000055305  | ret              | 2736 | 6512  | 1,22 | 1,10E-03 |
| ENSDARG00000092489  | si:ch73-103b9.2  | 24   | 57    | 1,22 | 7,73E-03 |
| ENSDARG00000037607  | nol4lb           | 44   | 105   | 1,22 | 9,07E-04 |
| ENSDARG00000077545  | si:dkey-16p21.7  | 15   | 38    | 1,22 | 5,11E-03 |
| ENSDARG00000045549  | bik              | 9    | 21    | 1,22 | 3,54E-02 |
| ENSDARG00000036291  | nucb2b           | 4465 | 10444 | 1,21 | 2,04E-06 |
| ENSDARG00000103924  | zgc:154055       | 37   | 90    | 1,21 | 1,26E-02 |

|                     |                |      |       |      |          |
|---------------------|----------------|------|-------|------|----------|
| ENSDARG00000018179  | acvrl1         | 13   | 32    | 1,21 | 3,12E-03 |
| ENSDARG00000100452  | nop53          | 484  | 1146  | 1,21 | 2,20E-03 |
| ENSDARG00000036420  | si:dkey-33c9.6 | 13   | 30    | 1,21 | 3,34E-02 |
| ENSDARG00000014081  | fam184a        | 190  | 448   | 1,21 | 1,46E-03 |
| ENSDARG00000079295  | cacna1bb       | 249  | 585   | 1,20 | 8,24E-04 |
| ENSDARG00000096603  | bmb            | 94   | 228   | 1,20 | 4,05E-02 |
| ENSDARG00000042141  | myo6b          | 62   | 148   | 1,20 | 1,03E-02 |
| ENSDARG00000115902  | lnpa           | 54   | 127   | 1,20 | 6,39E-04 |
| ENSDARG00000101419  | drp2           | 36   | 85    | 1,20 | 2,66E-02 |
| ENSDARG00000029668  | crim1          | 176  | 411   | 1,20 | 1,48E-03 |
| ENSDARG00000031763  | smad6b         | 110  | 260   | 1,20 | 6,50E-03 |
| ENSDARG00000102340  | ptn            | 5252 | 12530 | 1,20 | 2,52E-02 |
| ENSDARG00000098897  | pds5b          | 196  | 454   | 1,19 | 8,25E-05 |
| ENSDARG00000063626  | ddx21          | 250  | 586   | 1,19 | 3,35E-03 |
| ENSDARG00000002988  | tnnt2d         | 29   | 68    | 1,19 | 2,07E-02 |
| ENSDARG00000073883  | clstn3         | 1081 | 2547  | 1,19 | 1,56E-02 |
| ENSDARG00000026871  | uchl1          | 240  | 554   | 1,18 | 4,31E-04 |
| ENSDARG00000099753  | zgc:63863      | 47   | 109   | 1,18 | 1,10E-03 |
| ENSDARG00000079908  | tmem151a       | 11   | 25    | 1,18 | 9,26E-03 |
| ENSDARG00000052748  | capn1b         | 37   | 87    | 1,17 | 1,04E-02 |
| ENSDARG00000005453  | foxp2          | 142  | 327   | 1,17 | 1,68E-03 |
| ENSDARG00000075851  | oafa           | 85   | 201   | 1,17 | 4,50E-02 |
| ENSDARG00000062797  | nell2b         | 46   | 108   | 1,17 | 4,06E-02 |
| ENSDARG00000077410  | myo9b          | 51   | 116   | 1,17 | 4,29E-03 |
| ENSDARG00000020845  | tns1b          | 131  | 303   | 1,17 | 7,48E-03 |
| ENSDARG00000017058  | large2         | 107  | 246   | 1,17 | 3,21E-03 |
| ENSDARG00000091756  | insm1a         | 840  | 1910  | 1,17 | 2,23E-04 |
| ENSDARG00000015053  | grip1          | 28   | 65    | 1,16 | 3,32E-02 |
| ENSDARG00000100524  | abca3b         | 450  | 1019  | 1,16 | 1,79E-05 |
| ENSDARG00000036505  | syt4           | 918  | 2089  | 1,16 | 2,07E-03 |
| ENSDARG00000100708  | jakmip3        | 12   | 28    | 1,16 | 9,77E-03 |
| ENSDARG00000020107  | usp2a          | 305  | 687   | 1,16 | 4,27E-05 |
| ENSDARG00000006892  | myo3b          | 139  | 315   | 1,16 | 5,00E-04 |
| ENSDARG00000029524  | impdh1b        | 624  | 1402  | 1,16 | 1,34E-06 |
| ENSDARG00000104478  | cap2           | 55   | 127   | 1,16 | 1,03E-02 |
| ENSDARG00000062934  | gpr12          | 42   | 97    | 1,15 | 2,46E-02 |
| ENSDARG00000021579  | orc5           | 44   | 100   | 1,15 | 1,84E-02 |
| ENSDARG00000005034  | ispd           | 340  | 759   | 1,15 | 5,65E-06 |
| ENSDARG00000104874  | CABZ01088508.1 | 16   | 37    | 1,15 | 3,41E-03 |
| ENSDARG00000007774  | vash2          | 66   | 148   | 1,15 | 1,09E-03 |
| ENSDARG00000002127  | stam           | 283  | 630   | 1,14 | 1,56E-06 |
| ENSDARG00000078676  | myrf           | 42   | 96    | 1,14 | 3,03E-02 |
| ENSDARG00000028000  | pfkpa          | 172  | 383   | 1,14 | 7,21E-04 |
| ENSDARG00000100947  | mafk           | 82   | 184   | 1,13 | 7,14E-03 |
| ENSDARG00000009693  | llgl1          | 74   | 168   | 1,13 | 1,62E-02 |
| ENSDARG00000009242  | fev            | 343  | 762   | 1,13 | 3,00E-03 |
| ENSDARG00000036329  | ndufa1         | 732  | 1621  | 1,13 | 3,52E-04 |
| ENSDARG00000103390  | cacna2d2a      | 348  | 779   | 1,13 | 7,58E-03 |
| ENSDARG00000021846  | hid1a          | 208  | 460   | 1,13 | 2,51E-04 |
| ENSDARG00000007171  | aig1           | 51   | 114   | 1,12 | 4,95E-03 |
| ENSDARG000000061994 | acacb          | 80   | 179   | 1,12 | 1,01E-02 |
| ENSDARG000000069995 | dpy19l1l       | 61   | 136   | 1,12 | 2,84E-02 |
| ENSDARG00000043661  | cadpsa         | 130  | 288   | 1,12 | 9,55E-04 |
| ENSDARG00000037403  | si:dkey-4p15.3 | 236  | 530   | 1,12 | 2,71E-02 |
| ENSDARG00000060070  | adcy7          | 129  | 283   | 1,12 | 3,01E-04 |
| ENSDARG00000063433  | atp2b2         | 181  | 407   | 1,12 | 2,24E-02 |
| ENSDARG00000104014  | mark1          | 28   | 63    | 1,12 | 8,16E-03 |
| ENSDARG00000057007  | ctbp1          | 1036 | 2272  | 1,12 | 8,16E-05 |
| ENSDARG00000100170  | pam            | 6467 | 14195 | 1,12 | 1,58E-04 |
| ENSDARG00000017798  | bcor           | 208  | 457   | 1,11 | 4,77E-04 |
| ENSDARG00000031768  | rora           | 156  | 346   | 1,11 | 1,30E-02 |
| ENSDARG00000014655  | itpr1a         | 35   | 77    | 1,11 | 8,71E-03 |
| ENSDARG00000090213  | rheb           | 145  | 314   | 1,10 | 1,75E-05 |
| ENSDARG00000063910  | mt-atp8        | 271  | 587   | 1,10 | 2,51E-04 |
| ENSDARG00000061272  | BX294434.1     | 29   | 64    | 1,10 | 1,02E-02 |

|                    |                   |       |       |       |          |
|--------------------|-------------------|-------|-------|-------|----------|
| ENSDARG00000069467 | igsf9bb           | 28    | 61    | 1,10  | 1,68E-02 |
| ENSDARG00000104339 | SMARCA4           | 42    | 92    | 1,09  | 3,00E-02 |
| ENSDARG00000055874 | cpe               | 11521 | 24810 | 1,09  | 3,07E-04 |
| ENSDARG00000101844 | mibp2             | 1644  | 3551  | 1,09  | 1,61E-03 |
| ENSDARG00000075437 | shc1              | 127   | 271   | 1,09  | 2,70E-05 |
| ENSDARG00000102380 | cnnm4a            | 38    | 83    | 1,08  | 3,12E-02 |
| ENSDARG00000039346 | ndufa5            | 357   | 768   | 1,08  | 2,08E-03 |
| ENSDARG00000069940 | ppap2d            | 153   | 327   | 1,08  | 1,88E-03 |
| ENSDARG00000036337 | cers3b            | 27    | 59    | 1,08  | 2,02E-02 |
| ENSDARG00000078078 | lrfn4b            | 38    | 83    | 1,08  | 3,92E-02 |
| ENSDARG00000037593 | prickle2b         | 237   | 508   | 1,08  | 1,12E-03 |
| ENSDARG00000087843 | cntn1a            | 31    | 67    | 1,08  | 3,42E-02 |
| ENSDARG00000078169 | cacna2d2b         | 155   | 335   | 1,08  | 8,16E-03 |
| ENSDARG00000069318 | efr3bb            | 66    | 143   | 1,08  | 7,17E-04 |
| ENSDARG00000071673 | ctdspla           | 101   | 215   | 1,07  | 7,99E-05 |
| ENSDARG0000008026  | fam129bb          | 75    | 162   | 1,07  | 1,35E-02 |
| ENSDARG00000042545 | sema3ga           | 35    | 76    | 1,07  | 1,50E-02 |
| ENSDARG00000043055 | hiat1b            | 318   | 673   | 1,07  | 2,42E-05 |
| ENSDARG00000056262 | slc35g2a          | 505   | 1074  | 1,07  | 1,38E-03 |
| ENSDARG00000110357 | irf1b             | 465   | 992   | 1,07  | 5,11E-03 |
| ENSDARG00000007886 | slc35b2           | 157   | 333   | 1,07  | 9,69E-07 |
| ENSDARG00000104347 | rtn4b             | 40    | 84    | 1,06  | 6,11E-05 |
| ENSDARG00000014017 | rrm1              | 30    | 63    | 1,06  | 1,56E-02 |
| ENSDARG00000021984 | ndufa2            | 252   | 535   | 1,06  | 6,97E-03 |
| ENSDARG00000087018 | FO704748.1        | 25    | 54    | 1,06  | 1,36E-02 |
| ENSDARG00000036903 | irak1bp1          | 23    | 50    | 1,06  | 2,71E-02 |
| ENSDARG00000077145 | adcy3a            | 54    | 115   | 1,05  | 2,67E-02 |
| ENSDARG00000101979 | eps8l3a           | 57    | 121   | 1,05  | 9,17E-03 |
| ENSDARG00000023724 | cdc42se1          | 152   | 321   | 1,05  | 3,89E-02 |
| ENSDARG00000046022 | tmed7             | 1068  | 2228  | 1,04  | 1,67E-03 |
| ENSDARG00000102118 | slf1              | 32    | 68    | 1,04  | 4,75E-03 |
| ENSDARG00000012593 | col5a1            | 57    | 120   | 1,04  | 1,03E-02 |
| ENSDARG00000104538 | tmem184a          | 288   | 600   | 1,04  | 2,08E-03 |
| ENSDARG00000074604 | phc3              | 60    | 127   | 1,04  | 2,73E-02 |
| ENSDARG00000059789 | parp8             | 193   | 398   | 1,03  | 4,79E-05 |
| ENSDARG00000043130 | notch2            | 55    | 114   | 1,03  | 7,55E-03 |
| ENSDARG00000032985 | mrpl27            | 118   | 246   | 1,03  | 2,02E-02 |
| ENSDARG00000007614 | wwox              | 45    | 93    | 1,03  | 7,98E-04 |
| ENSDARG00000005359 | sucla2            | 684   | 1399  | 1,03  | 1,17E-05 |
| ENSDARG00000055502 | cicb              | 238   | 489   | 1,02  | 2,99E-04 |
| ENSDARG00000006923 | cacna1ab          | 167   | 347   | 1,02  | 2,82E-02 |
| ENSDARG00000069970 | lingo2b           | 107   | 219   | 1,02  | 1,78E-03 |
| ENSDARG00000056105 | syt11b            | 60    | 122   | 1,02  | 4,04E-03 |
| ENSDARG00000100371 | eef2b             | 8130  | 16683 | 1,01  | 1,07E-02 |
| ENSDARG00000030756 | dnmt1             | 30    | 61    | 1,01  | 2,11E-02 |
| ENSDARG00000099499 | ndufa4l           | 1066  | 2169  | 1,01  | 5,76E-04 |
| ENSDARG00000079244 | pigw              | 35    | 71    | 1,00  | 4,44E-02 |
| ENSDARG00000042484 | tle2a             | 139   | 282   | 1,00  | 2,49E-04 |
| ENSDARG00000029296 | nexmifb           | 571   | 282   | -1,01 | 1,46E-04 |
| ENSDARG00000016623 | si:ch211-195b13.1 | 2181  | 1070  | -1,01 | 1,08E-02 |
| ENSDARG00000031075 | cadm1a            | 277   | 135   | -1,01 | 4,21E-02 |
| ENSDARG00000115425 | CABZ01038524.1    | 56    | 28    | -1,01 | 1,21E-02 |
| ENSDARG00000063370 | sgk2a             | 1000  | 494   | -1,01 | 2,65E-07 |
| ENSDARG00000018153 | nt5c1ba           | 41    | 19    | -1,01 | 4,85E-02 |
| ENSDARG00000103848 | apba1a            | 81    | 39    | -1,01 | 2,67E-02 |
| ENSDARG00000059857 | blvra             | 190   | 93    | -1,01 | 2,88E-03 |
| ENSDARG00000034222 | hs1bp3            | 98    | 47    | -1,02 | 1,58E-02 |
| ENSDARG00000075564 | fam13a            | 669   | 326   | -1,02 | 2,20E-03 |
| ENSDARG00000056483 | ssbp4             | 527   | 259   | -1,02 | 1,11E-04 |
| ENSDARG00000005049 | rab20             | 134   | 66    | -1,02 | 1,95E-03 |
| ENSDARG00000042005 | elp3              | 381   | 185   | -1,02 | 8,98E-05 |
| ENSDARG00000061021 | fam160a1a         | 118   | 56    | -1,03 | 8,12E-03 |
| ENSDARG00000028957 | maff              | 657   | 320   | -1,03 | 4,21E-04 |
| ENSDARG00000101725 | parietopsin       | 51    | 26    | -1,03 | 4,69E-02 |
| ENSDARG00000103743 | si:dkeyp-72e1.9   | 168   | 80    | -1,03 | 4,11E-02 |

|                     |                   |       |      |       |          |
|---------------------|-------------------|-------|------|-------|----------|
| ENSDARG00000029472  | afdna             | 952   | 459  | -1,04 | 2,51E-03 |
| ENSDARG00000052074  | si:ch211-122f10.4 | 145   | 69   | -1,04 | 1,83E-03 |
| ENSDARG00000043710  | parvaa            | 74    | 36   | -1,04 | 3,87E-02 |
| ENSDARG00000077138  | zgc:195173        | 532   | 254  | -1,04 | 1,15E-02 |
| ENSDARG00000015822  | sesn3             | 1943  | 932  | -1,04 | 2,13E-03 |
| ENSDARG00000103542  | vegfaa            | 1139  | 547  | -1,04 | 2,45E-04 |
| ENSDARG00000102424  | si:ch211-114m9.1  | 258   | 124  | -1,04 | 1,58E-03 |
| ENSDARG00000060366  | slc12a9           | 306   | 147  | -1,04 | 6,93E-04 |
| ENSDARG00000112923  | CABZ01088036.1    | 186   | 89   | -1,05 | 4,74E-03 |
| ENSDARG00000041108  | ctsh              | 543   | 259  | -1,05 | 1,72E-05 |
| ENSDARG00000098108  | duzp2             | 12763 | 6048 | -1,05 | 1,39E-02 |
| ENSDARG00000057378  | selenou1a         | 232   | 111  | -1,05 | 3,19E-05 |
| ENSDARG00000053474  | tdrkh             | 142   | 67   | -1,05 | 7,98E-04 |
| ENSDARG00000062831  | si:ch73-22o12.1   | 891   | 425  | -1,06 | 1,98E-04 |
| ENSDARG00000087048  | si:dkey-165n16.1  | 241   | 113  | -1,06 | 2,76E-02 |
| ENSDARG00000036058  | gnao1b            | 949   | 450  | -1,06 | 2,35E-03 |
| ENSDARG00000037894  | ezh1              | 72    | 33   | -1,06 | 3,94E-02 |
| ENSDARG00000002037  | pfkfb2b           | 349   | 165  | -1,06 | 2,83E-04 |
| ENSDARG00000101175  | mcu               | 512   | 239  | -1,07 | 2,86E-02 |
| ENSDARG00000039422  | fuom              | 90    | 42   | -1,07 | 3,75E-02 |
| ENSDARG00000007818  | palm1b            | 403   | 192  | -1,07 | 1,43E-06 |
| ENSDARG00000061817  | kif1aa            | 188   | 86   | -1,07 | 2,95E-02 |
| ENSDARG00000024828  | tmem134           | 444   | 210  | -1,07 | 1,57E-06 |
| ENSDARG00000042846  | disp2             | 2305  | 1081 | -1,07 | 2,52E-03 |
| ENSDARG00000053119  | smpdl3a           | 240   | 112  | -1,07 | 8,17E-03 |
| ENSDARG00000029751  | wbp1lb            | 431   | 200  | -1,08 | 1,03E-02 |
| ENSDARG00000042620  | gstr              | 1194  | 560  | -1,08 | 1,19E-04 |
| ENSDARG00000016745  | slc35f6           | 660   | 307  | -1,09 | 1,56E-03 |
| ENSDARG00000074071  | mrnip             | 108   | 50   | -1,09 | 4,29E-02 |
| ENSDARG00000006257  | vldlr             | 969   | 452  | -1,09 | 2,60E-03 |
| ENSDARG00000112454  | FO744833.2        | 51    | 24   | -1,09 | 1,39E-02 |
| ENSDARG00000075253  | pik3cb            | 173   | 80   | -1,09 | 1,60E-02 |
| ENSDARG00000026680  | slc25a14          | 914   | 424  | -1,09 | 1,04E-04 |
| ENSDARG00000103522  | si:zfos-943e10.1  | 91    | 41   | -1,10 | 2,79E-02 |
| ENSDARG000000020761 | arrdc2            | 1445  | 661  | -1,10 | 1,10E-02 |
| ENSDARG000000001303 | psmb8a            | 350   | 161  | -1,10 | 6,82E-04 |
| ENSDARG00000102684  | lrrc1             | 105   | 48   | -1,10 | 8,94E-03 |
| ENSDARG00000079530  | si:dkey-17m8.1    | 266   | 123  | -1,10 | 8,30E-05 |
| ENSDARG00000011042  | pgbd5             | 424   | 192  | -1,10 | 1,76E-02 |
| ENSDARG00000010794  | tfeb              | 887   | 409  | -1,11 | 1,02E-04 |
| ENSDARG00000099313  | naga              | 298   | 136  | -1,11 | 7,71E-04 |
| ENSDARG00000011157  | arhgef18a         | 435   | 198  | -1,11 | 4,91E-03 |
| ENSDARG00000055115  | dtncp1a           | 405   | 185  | -1,12 | 4,57E-06 |
| ENSDARG00000042630  | hebp2             | 447   | 203  | -1,12 | 2,52E-03 |
| ENSDARG00000059836  | ddit3             | 1599  | 721  | -1,12 | 1,63E-02 |
| ENSDARG00000043081  | ctsz              | 237   | 108  | -1,12 | 1,09E-04 |
| ENSDARG00000026406  | anxa5a            | 614   | 276  | -1,12 | 1,10E-02 |
| ENSDARG00000035652  | sat1a.1           | 585   | 259  | -1,13 | 4,94E-02 |
| ENSDARG00000007760  | spg21             | 654   | 297  | -1,13 | 2,77E-05 |
| ENSDARG00000063509  | lrrc58b           | 126   | 57   | -1,13 | 2,35E-03 |
| ENSDARG00000031817  | trim2a            | 352   | 158  | -1,13 | 2,71E-03 |
| ENSDARG000000024785 | ctnna2            | 418   | 189  | -1,13 | 9,98E-04 |
| ENSDARG00000061918  | cplx2             | 1361  | 609  | -1,13 | 1,25E-02 |
| ENSDARG00000076010  | twist1b           | 186   | 83   | -1,13 | 3,95E-02 |
| ENSDARG00000059906  | sdca4             | 2173  | 977  | -1,13 | 7,94E-04 |
| ENSDARG00000076779  | fam13b            | 3664  | 1655 | -1,14 | 9,36E-06 |
| ENSDARG00000062054  | cpt1ab            | 788   | 349  | -1,14 | 1,39E-02 |
| ENSDARG00000058538  | alcamb            | 4366  | 1905 | -1,14 | 3,29E-02 |
| ENSDARG00000074414  | sema4ba           | 279   | 125  | -1,14 | 5,74E-04 |
| ENSDARG00000038025  | cbx7a             | 1104  | 488  | -1,14 | 1,52E-02 |
| ENSDARG00000094578  | epsti1            | 64    | 29   | -1,14 | 1,80E-02 |
| ENSDARG00000043899  | psma6l            | 59    | 26   | -1,14 | 7,19E-03 |
| ENSDARG00000044073  | fuca2             | 807   | 363  | -1,14 | 2,09E-06 |
| ENSDARG00000092667  | si:ch211-271e10.2 | 155   | 69   | -1,14 | 7,01E-03 |
| ENSDARG00000087413  | bean1             | 396   | 174  | -1,14 | 9,16E-03 |

|                     |                   |      |      |       |          |
|---------------------|-------------------|------|------|-------|----------|
| ENSDARG00000075264  | FAM124A           | 228  | 101  | -1,15 | 3,18E-04 |
| ENSDARG00000002656  | stxbp5a           | 555  | 243  | -1,15 | 1,85E-02 |
| ENSDARG000000062135 | sytl5             | 186  | 82   | -1,15 | 6,07E-03 |
| ENSDARG000000099646 | pcdh1g3           | 86   | 38   | -1,15 | 2,87E-03 |
| ENSDARG000000058692 | fzd3b             | 127  | 56   | -1,15 | 2,35E-02 |
| ENSDARG00000018921  | fam84a            | 486  | 212  | -1,15 | 1,75E-02 |
| ENSDARG00000019532  | fads2             | 92   | 40   | -1,16 | 2,75E-02 |
| ENSDARG00000014914  | lamp2             | 2394 | 1054 | -1,16 | 3,44E-03 |
| ENSDARG000000069302 | snx9b             | 1083 | 483  | -1,16 | 5,71E-06 |
| ENSDARG000000069951 | eef1a1b           | 540  | 234  | -1,16 | 3,31E-02 |
| ENSDARG000000053298 | nkx2.2a           | 1153 | 511  | -1,16 | 9,06E-06 |
| ENSDARG000000095754 | si:dkey-234h16.7  | 199  | 87   | -1,16 | 3,29E-03 |
| ENSDARG000000052658 | pptc7b            | 151  | 66   | -1,16 | 4,18E-03 |
| ENSDARG00000017105  | vaspb             | 340  | 149  | -1,17 | 1,32E-06 |
| ENSDARG00000100280  | znfx1             | 70   | 29   | -1,17 | 3,22E-02 |
| ENSDARG00000006031  | abat              | 1119 | 496  | -1,17 | 1,00E-06 |
| ENSDARG000000031776 | zgc:92066         | 4090 | 1790 | -1,17 | 1,29E-03 |
| ENSDARG00000011376  | dnase1l4.2        | 334  | 145  | -1,17 | 1,54E-03 |
| ENSDARG000000032856 | ccdc120           | 107  | 46   | -1,18 | 4,53E-03 |
| ENSDARG00000101446  | PCP4L1            | 265  | 115  | -1,18 | 7,07E-04 |
| ENSDARG000000037196 | arid5b            | 342  | 149  | -1,18 | 4,38E-04 |
| ENSDARG000000043211 | ripk4             | 159  | 69   | -1,18 | 2,20E-03 |
| ENSDARG000000068981 | glceb             | 455  | 199  | -1,18 | 1,26E-05 |
| ENSDARG00000110950  | CU929544.1        | 160  | 68   | -1,18 | 4,21E-02 |
| ENSDARG00000026655  | tspo              | 468  | 202  | -1,18 | 4,00E-03 |
| ENSDARG000000009390 | npl               | 513  | 222  | -1,18 | 3,19E-03 |
| ENSDARG00000100822  | mapk15            | 167  | 71   | -1,18 | 7,79E-03 |
| ENSDARG000000055288 | prelid3a          | 49   | 20   | -1,19 | 4,70E-02 |
| ENSDARG000000077101 | zbtb10            | 105  | 46   | -1,19 | 8,18E-04 |
| ENSDARG000000062096 | pm20d1.2          | 513  | 224  | -1,19 | 4,35E-07 |
| ENSDARG000000098578 | pdgfab            | 286  | 121  | -1,19 | 3,14E-02 |
| ENSDARG000000099483 | vdra              | 66   | 28   | -1,19 | 1,72E-02 |
| ENSDARG00000013847  | egfra             | 315  | 136  | -1,19 | 2,40E-04 |
| ENSDARG000000056647 | klhl3             | 594  | 259  | -1,19 | 1,13E-07 |
| ENSDARG000000078011 | NAV1 (1 of many)  | 135  | 58   | -1,20 | 4,56E-03 |
| ENSDARG000000002523 | hsdl2             | 1013 | 438  | -1,20 | 1,78E-06 |
| ENSDARG000000024443 | gnpda2            | 287  | 123  | -1,20 | 6,41E-04 |
| ENSDARG000000031647 | stat2             | 287  | 121  | -1,20 | 1,32E-02 |
| ENSDARG000000025974 | magi3b            | 243  | 103  | -1,20 | 3,90E-03 |
| ENSDARG000000037421 | egr1              | 4925 | 2075 | -1,20 | 1,70E-02 |
| ENSDARG00000117133  | cst14b.1          | 172  | 73   | -1,20 | 1,84E-03 |
| ENSDARG000000021987 | plecb             | 551  | 232  | -1,20 | 1,12E-02 |
| ENSDARG000000040930 | deptr             | 2261 | 970  | -1,20 | 4,04E-05 |
| ENSDARG000000059610 | gpr146            | 696  | 297  | -1,20 | 2,29E-04 |
| ENSDARG000000095453 | si:rp71-17i16.6   | 117  | 48   | -1,21 | 4,22E-02 |
| ENSDARG000000032990 | plxnb3            | 174  | 73   | -1,21 | 3,33E-02 |
| ENSDARG000000000796 | nr4a1             | 4096 | 1725 | -1,21 | 4,48E-03 |
| ENSDARG000000070227 | nhsa              | 69   | 28   | -1,21 | 4,02E-02 |
| ENSDARG000000069264 | si:ch211-196h16.5 | 36   | 14   | -1,21 | 3,19E-02 |
| ENSDARG000000054302 | ehd4              | 518  | 218  | -1,22 | 7,01E-04 |
| ENSDARG000000094210 | zgc:109934        | 96   | 39   | -1,23 | 3,87E-02 |
| ENSDARG00000114963  | BX901962.12       | 22   | 8    | -1,23 | 2,25E-02 |
| ENSDARG000000058358 | krt8              | 2070 | 864  | -1,23 | 1,06E-03 |
| ENSDARG000000075149 | nagpa             | 149  | 62   | -1,23 | 6,50E-04 |
| ENSDARG000000086735 | si:ch1073-111c8.3 | 90   | 38   | -1,23 | 4,47E-03 |
| ENSDARG00000012040  | rnf19a            | 516  | 214  | -1,23 | 1,56E-03 |
| ENSDARG000000076265 | ano8a             | 164  | 68   | -1,24 | 3,73E-03 |
| ENSDARG000000086739 | SLC17A3           | 270  | 110  | -1,24 | 1,90E-02 |
| ENSDARG000000092731 | mhc1uka           | 1532 | 625  | -1,24 | 1,25E-02 |
| ENSDARG000000068421 | ttc9b             | 99   | 42   | -1,24 | 3,55E-03 |
| ENSDARG000000039150 | lgmn              | 2121 | 888  | -1,24 | 7,46E-07 |
| ENSDARG000000054454 | epha4a            | 688  | 280  | -1,25 | 5,86E-03 |
| ENSDARG000000055698 | pcnxi2            | 346  | 139  | -1,26 | 2,42E-02 |
| ENSDARG000000058231 | nt5c2b            | 194  | 81   | -1,26 | 1,04E-04 |
| ENSDARG000000089213 | adam15            | 24   | 10   | -1,26 | 4,88E-02 |

|                     |                   |       |       |       |          |
|---------------------|-------------------|-------|-------|-------|----------|
| ENSDARG00000076014  | ERC1              | 273   | 112   | -1,26 | 4,77E-04 |
| ENSDARG00000037905  | cacna1aa          | 317   | 125   | -1,26 | 3,80E-02 |
| ENSDARG00000056477  | ccdc125           | 241   | 97    | -1,26 | 3,68E-03 |
| ENSDARG000000117163 | znf1114           | 19    | 7     | -1,27 | 2,24E-02 |
| ENSDARG00000099035  | pcdh1g33          | 25    | 10    | -1,27 | 3,97E-02 |
| ENSDARG00000092407  | zmp:0000001316    | 19    | 7     | -1,27 | 4,99E-02 |
| ENSDARG00000039931  | slc25a33          | 671   | 273   | -1,27 | 4,32E-04 |
| ENSDARG00000059048  | mpzl1l            | 152   | 61    | -1,27 | 4,78E-03 |
| ENSDARG00000008548  | arhgap12a         | 1022  | 412   | -1,27 | 4,92E-03 |
| ENSDARG00000052617  | raver1            | 381   | 154   | -1,28 | 4,20E-04 |
| ENSDARG00000009961  | rundc3b           | 190   | 74    | -1,28 | 3,54E-02 |
| ENSDARG00000053130  | pcp4a             | 540   | 213   | -1,28 | 3,43E-02 |
| ENSDARG00000011770  | dhrs12            | 253   | 100   | -1,28 | 1,30E-02 |
| ENSDARG00000103370  | lrrc8da           | 84    | 32    | -1,28 | 3,93E-02 |
| ENSDARG00000015732  | cax2              | 61    | 24    | -1,28 | 1,69E-02 |
| ENSDARG00000004372  | fmnl3             | 138   | 54    | -1,28 | 9,79E-03 |
| ENSDARG00000088342  | tmem145           | 543   | 220   | -1,28 | 2,65E-04 |
| ENSDARG00000079584  | zgc:194930        | 475   | 194   | -1,29 | 3,71E-08 |
| ENSDARG000000087088 | si:ch211-274p24.4 | 27    | 10    | -1,29 | 1,94E-02 |
| ENSDARG000000063075 | soga1             | 485   | 194   | -1,29 | 1,60E-03 |
| ENSDARG00000038398  | FQ311927.1        | 71    | 28    | -1,29 | 4,61E-02 |
| ENSDARG00000053583  | cers6             | 1194  | 480   | -1,29 | 3,47E-05 |
| ENSDARG00000052322  | tlr5b             | 225   | 89    | -1,29 | 8,59E-03 |
| ENSDARG00000009040  | si:ch73-141c7.1   | 90    | 35    | -1,31 | 2,87E-02 |
| ENSDARG00000009689  | daam1b            | 197   | 77    | -1,31 | 2,49E-04 |
| ENSDARG00000059690  | slc29a4           | 341   | 131   | -1,32 | 7,16E-03 |
| ENSDARG00000053636  | cracr2b           | 161   | 62    | -1,32 | 1,25E-02 |
| ENSDARG00000077726  | nocta             | 1518  | 597   | -1,32 | 1,69E-05 |
| ENSDARG00000104172  | diabloa           | 71    | 28    | -1,32 | 1,32E-02 |
| ENSDARG00000031683  | fosab             | 49096 | 19204 | -1,33 | 1,65E-04 |
| ENSDARG00000033978  | nxn               | 77    | 29    | -1,33 | 3,34E-02 |
| ENSDARG00000029795  | fam213b           | 235   | 88    | -1,33 | 2,76E-02 |
| ENSDARG00000029955  | glb1l             | 243   | 95    | -1,33 | 2,19E-04 |
| ENSDARG00000055751  | fosb              | 765   | 284   | -1,34 | 2,90E-02 |
| ENSDARG00000063032  | dok6              | 56    | 21    | -1,34 | 9,26E-03 |
| ENSDARG00000034181  | esr2b             | 197   | 73    | -1,35 | 2,01E-02 |
| ENSDARG00000040492  | mthfd1b           | 121   | 44    | -1,35 | 4,26E-02 |
| ENSDARG00000093799  | setbp1            | 203   | 79    | -1,35 | 1,51E-07 |
| ENSDARG00000053215  | me1               | 257   | 97    | -1,36 | 1,44E-04 |
| ENSDARG00000051853  | galns             | 134   | 51    | -1,37 | 3,52E-04 |
| ENSDARG00000098694  | FQ311908.1        | 43    | 15    | -1,37 | 2,16E-02 |
| ENSDARG00000070498  | phyhiplb          | 681   | 249   | -1,37 | 2,09E-02 |
| ENSDARG00000094268  | si:ch73-337l15.2  | 40    | 15    | -1,37 | 2,81E-02 |
| ENSDARG00000007172  | plxna3            | 205   | 77    | -1,37 | 2,97E-03 |
| ENSDARG00000037091  | asah1a            | 120   | 44    | -1,37 | 1,43E-02 |
| ENSDARG00000100913  | arhgef12b         | 246   | 92    | -1,38 | 4,58E-04 |
| ENSDARG00000028943  | mtss1la           | 266   | 99    | -1,38 | 4,01E-03 |
| ENSDARG00000039373  | epha3             | 89    | 33    | -1,38 | 1,56E-03 |
| ENSDARG00000094984  | si:ch211-197g15.8 | 180   | 66    | -1,38 | 1,77E-03 |
| ENSDARG00000076339  | cln5              | 88    | 33    | -1,38 | 3,04E-04 |
| ENSDARG00000058102  | sardh             | 164   | 61    | -1,38 | 2,18E-03 |
| ENSDARG00000057767  | nudt4a            | 166   | 61    | -1,39 | 9,55E-04 |
| ENSDARG00000018032  | scn8ab            | 100   | 38    | -1,39 | 5,70E-04 |
| ENSDARG00000059826  | crtac1a           | 822   | 301   | -1,39 | 8,43E-03 |
| ENSDARG00000103980  | ets2              | 326   | 123   | -1,39 | 1,45E-04 |
| ENSDARG00000060723  | stim1a            | 416   | 156   | -1,39 | 1,11E-06 |
| ENSDARG00000009881  | ier5              | 1391  | 498   | -1,39 | 2,59E-02 |
| ENSDARG00000090552  | si:dkey-7j14.6    | 2782  | 1025  | -1,40 | 1,01E-03 |
| ENSDARG00000102167  | ppox              | 152   | 56    | -1,40 | 5,76E-03 |
| ENSDARG00000086222  | nat16             | 157   | 57    | -1,40 | 3,66E-03 |
| ENSDARG00000038703  | hkdc1             | 1565  | 583   | -1,40 | 1,02E-06 |
| ENSDARG00000021113  | ptmaa             | 1367  | 503   | -1,41 | 4,17E-04 |
| ENSDARG00000040466  | vil1              | 633   | 230   | -1,41 | 1,21E-02 |
| ENSDARG00000017986  | vps13d            | 875   | 327   | -1,41 | 1,49E-06 |
| ENSDARG00000040717  | macc1             | 476   | 176   | -1,41 | 1,38E-05 |

|                    |                   |       |      |       |          |
|--------------------|-------------------|-------|------|-------|----------|
| ENSDARG00000092077 | si:dkey-147f3.4   | 33    | 11   | -1,41 | 3,95E-02 |
| ENSDARG00000046030 | zgc:110339        | 1670  | 619  | -1,41 | 8,99E-08 |
| ENSDARG00000036848 | slc43a2a          | 1976  | 674  | -1,42 | 3,98E-02 |
| ENSDARG00000020298 | btg2              | 13581 | 4947 | -1,42 | 3,73E-04 |
| ENSDARG00000057262 | si:dkey-91i10.3   | 54    | 19   | -1,42 | 3,29E-03 |
| ENSDARG00000103394 | kif5bb            | 1153  | 426  | -1,42 | 9,30E-09 |
| ENSDARG00000075048 | lonrf1            | 470   | 170  | -1,42 | 2,13E-03 |
| ENSDARG00000079892 | si:dkey-183c2.4   | 50    | 18   | -1,43 | 2,82E-03 |
| ENSDARG00000078645 | si:ch73-62l21.1   | 22    | 8    | -1,43 | 1,87E-02 |
| ENSDARG00000076092 | slc31a2           | 287   | 103  | -1,43 | 4,77E-04 |
| ENSDARG00000079133 | si:dkey-10c21.1   | 151   | 54   | -1,43 | 2,79E-06 |
| ENSDARG00000007807 | cyth3a            | 70    | 25   | -1,43 | 1,95E-02 |
| ENSDARG00000051748 | ccnd2a            | 760   | 277  | -1,43 | 1,20E-06 |
| ENSDARG00000086881 | ier2b             | 2026  | 729  | -1,44 | 2,91E-04 |
| ENSDARG00000070165 | tnfrsf1b          | 344   | 124  | -1,44 | 5,80E-05 |
| ENSDARG00000039218 | gpr101            | 104   | 36   | -1,44 | 2,34E-02 |
| ENSDARG00000015749 | hps3              | 169   | 60   | -1,44 | 2,07E-03 |
| ENSDARG00000079572 | plcd3b            | 36    | 12   | -1,44 | 3,24E-02 |
| ENSDARG00000061551 | rap1gap2a         | 636   | 228  | -1,44 | 3,57E-04 |
| ENSDARG00000001463 | tdh2              | 157   | 55   | -1,45 | 1,38E-03 |
| ENSDARG00000037069 | zdhhc14           | 206   | 74   | -1,45 | 1,42E-04 |
| ENSDARG00000074311 | mast2             | 702   | 254  | -1,45 | 1,40E-05 |
| ENSDARG00000070844 | gamt              | 236   | 82   | -1,46 | 3,49E-03 |
| ENSDARG00000010789 | homer3b           | 395   | 140  | -1,46 | 1,30E-03 |
| ENSDARG00000043249 | irf1b             | 342   | 117  | -1,46 | 3,15E-02 |
| ENSDARG00000098497 | hrasa             | 96    | 33   | -1,46 | 4,61E-03 |
| ENSDARG00000090036 | RHOBTB3           | 160   | 56   | -1,46 | 5,15E-03 |
| ENSDARG00000102056 | si:dkeyp-94b4.1   | 571   | 204  | -1,46 | 1,02E-04 |
| ENSDARG00000043531 | jun               | 3024  | 1038 | -1,46 | 8,56E-03 |
| ENSDARG00000011490 | scube3            | 276   | 95   | -1,47 | 9,72E-03 |
| ENSDARG00000077473 | mych              | 124   | 42   | -1,47 | 3,01E-02 |
| ENSDARG00000097019 | dhrs13b           | 92    | 32   | -1,47 | 1,80E-02 |
| ENSDARG00000008388 | mmp14b            | 56    | 18   | -1,47 | 4,52E-02 |
| ENSDARG00000038359 | enosf1            | 267   | 92   | -1,47 | 2,39E-03 |
| ENSDARG00000009939 | micu2             | 96    | 33   | -1,48 | 1,42E-03 |
| ENSDARG00000006672 | fam49a            | 2128  | 750  | -1,48 | 2,48E-05 |
| ENSDARG00000078882 | slc22a31          | 61    | 21   | -1,48 | 3,10E-03 |
| ENSDARG00000103937 | ndrg4             | 297   | 99   | -1,48 | 1,73E-02 |
| ENSDARG00000102572 | si:ch211-260e23.9 | 1087  | 376  | -1,48 | 1,56E-03 |
| ENSDARG00000009499 | syne1a            | 783   | 274  | -1,49 | 8,71E-05 |
| ENSDARG00000002411 | pde4cb            | 414   | 141  | -1,49 | 6,55E-03 |
| ENSDARG00000055075 | svila             | 517   | 173  | -1,49 | 1,78E-02 |
| ENSDARG00000055120 | ctsba             | 573   | 199  | -1,49 | 4,72E-05 |
| ENSDARG00000062799 | baiap2a           | 259   | 89   | -1,50 | 1,14E-04 |
| ENSDARG00000015907 | dcbl1d1           | 215   | 75   | -1,50 | 5,51E-05 |
| ENSDARG00000062756 | pllp              | 693   | 238  | -1,50 | 1,22E-03 |
| ENSDARG00000058820 | bin1b             | 106   | 36   | -1,50 | 1,50E-03 |
| ENSDARG00000090444 | ponzr1            | 1079  | 365  | -1,50 | 3,37E-03 |
| ENSDARG00000055831 | si:dkey-182g1.6   | 92    | 30   | -1,51 | 1,47E-02 |
| ENSDARG00000090844 | CABZ01054965.1    | 235   | 81   | -1,51 | 7,16E-04 |
| ENSDARG00000062020 | gse1              | 389   | 136  | -1,51 | 7,29E-07 |
| ENSDARG00000058108 | eps8l2            | 600   | 204  | -1,51 | 5,36E-04 |
| ENSDARG00000095019 | lmo2              | 73    | 23   | -1,51 | 1,78E-02 |
| ENSDARG00000079291 | rapgef3           | 375   | 127  | -1,51 | 1,70E-03 |
| ENSDARG00000037496 | gria4a            | 256   | 87   | -1,51 | 4,53E-04 |
| ENSDARG00000071685 | slco5a1a          | 755   | 257  | -1,52 | 8,37E-05 |
| ENSDARG00000000730 | slc6a22.1         | 190   | 62   | -1,52 | 1,63E-02 |
| ENSDARG00000057296 | cbln1             | 36    | 11   | -1,52 | 4,94E-02 |
| ENSDARG00000028173 | slc4a2a           | 164   | 53   | -1,53 | 3,07E-02 |
| ENSDARG00000023287 | hsd17b3           | 40    | 13   | -1,54 | 1,51E-02 |
| ENSDARG00000093403 | si:ch73-376l24.4  | 55    | 18   | -1,54 | 4,71E-03 |
| ENSDARG00000058603 | jph1a             | 168   | 56   | -1,54 | 1,09E-03 |
| ENSDARG00000030630 | mfsd2aa           | 23    | 7    | -1,54 | 3,14E-02 |
| ENSDARG00000040177 | rgs16             | 2476  | 829  | -1,54 | 2,11E-04 |
| ENSDARG00000028017 | tp53inp1          | 801   | 267  | -1,54 | 3,04E-04 |

|                     |                   |      |      |       |          |
|---------------------|-------------------|------|------|-------|----------|
| ENSDARG00000054304  | homeza            | 243  | 81   | -1,55 | 4,47E-05 |
| ENSDARG00000074233  | pde4bb            | 260  | 87   | -1,55 | 1,81E-04 |
| ENSDARG00000079788  | fam171a1          | 211  | 70   | -1,55 | 4,10E-04 |
| ENSDARG00000039500  | LRFN3             | 310  | 102  | -1,56 | 2,50E-03 |
| ENSDARG00000004177  | fam169ab          | 58   | 18   | -1,56 | 1,16E-02 |
| ENSDARG00000019498  | cry5              | 44   | 14   | -1,57 | 1,21E-02 |
| ENSDARG00000102783  | slc25a35          | 54   | 18   | -1,57 | 9,74E-04 |
| ENSDARG00000037140  | pfkfb1            | 24   | 7    | -1,57 | 3,96E-02 |
| ENSDARG00000109715  | sncgb             | 587  | 187  | -1,57 | 1,00E-02 |
| ENSDARG00000016866  | fam102ab          | 260  | 82   | -1,57 | 3,80E-03 |
| ENSDARG00000028164  | cst14a.1          | 25   | 8    | -1,57 | 7,89E-03 |
| ENSDARG00000035610  | zgc:113208        | 235  | 75   | -1,58 | 4,24E-04 |
| ENSDARG00000002587  | dpysl3            | 408  | 135  | -1,58 | 1,89E-07 |
| ENSDARG00000099724  | relt              | 100  | 32   | -1,58 | 8,62E-04 |
| ENSDARG00000032317  | tox               | 1853 | 606  | -1,58 | 5,01E-06 |
| ENSDARG00000014675  | efna3a            | 82   | 26   | -1,58 | 4,20E-03 |
| ENSDARG00000016904  | bckdk             | 3174 | 1037 | -1,58 | 9,94E-06 |
| ENSDARG00000054036  | rnf34b            | 36   | 10   | -1,58 | 3,44E-02 |
| ENSDARG00000008568  | slc25a24          | 315  | 103  | -1,59 | 2,24E-05 |
| ENSDARG00000055129  | pim3              | 473  | 150  | -1,59 | 2,68E-03 |
| ENSDARG00000044345  | cyfip1            | 54   | 16   | -1,59 | 3,34E-02 |
| ENSDARG00000074469  | amigo3            | 945  | 303  | -1,60 | 2,44E-04 |
| ENSDARG00000103900  | sept9b            | 1119 | 367  | -1,60 | 5,05E-10 |
| ENSDARG00000076027  | kif5c             | 135  | 42   | -1,62 | 5,16E-03 |
| ENSDARG00000099106  | afmid             | 91   | 29   | -1,62 | 1,05E-03 |
| ENSDARG00000001712  | si:ch211-247n2.1  | 534  | 166  | -1,62 | 1,28E-03 |
| ENSDARG00000093612  | si:dkey-92i17.2   | 24   | 7    | -1,62 | 9,94E-03 |
| ENSDARG00000099918  | arl4aa            | 87   | 26   | -1,63 | 5,67E-03 |
| ENSDARG00000021735  | cacna1ba          | 566  | 179  | -1,63 | 8,60E-05 |
| ENSDARG00000035879  | fuca1.2           | 218  | 68   | -1,63 | 3,65E-05 |
| ENSDARG00000071029  | si:dkey-147f3.4   | 59   | 17   | -1,64 | 5,73E-03 |
| ENSDARG00000004307  | lypd6             | 275  | 84   | -1,65 | 8,21E-04 |
| ENSDARG00000060534  | sgpp1             | 105  | 33   | -1,65 | 5,76E-04 |
| ENSDARG00000092726  | si:dkey-184p9.7   | 90   | 26   | -1,66 | 1,64E-02 |
| ENSDARG00000101703  | zgc:158260        | 141  | 41   | -1,67 | 2,56E-02 |
| ENSDARG00000051880  | kcnj11            | 2145 | 663  | -1,67 | 3,59E-07 |
| ENSDARG00000090690  | nell2a            | 415  | 122  | -1,67 | 7,98E-03 |
| ENSDARG00000077301  | mlf1              | 56   | 16   | -1,68 | 9,17E-03 |
| ENSDARG00000004363  | lhfp16            | 183  | 54   | -1,68 | 1,77E-04 |
| ENSDARG00000103535  | SORCS3            | 218  | 65   | -1,68 | 4,70E-03 |
| ENSDARG00000074378  | junba             | 3355 | 1015 | -1,68 | 3,08E-05 |
| ENSDARG00000057410  | rxfp3             | 1096 | 329  | -1,68 | 6,36E-04 |
| ENSDARG00000026070  | cd82b             | 210  | 65   | -1,68 | 6,92E-06 |
| ENSDARG00000092998  | si:ch211-202f5.3  | 467  | 143  | -1,69 | 5,87E-09 |
| ENSDARG00000079917  | rassf7a           | 52   | 14   | -1,69 | 6,96E-03 |
| ENSDARG00000070174  | si:ch211-18i17.2  | 570  | 166  | -1,69 | 1,68E-03 |
| ENSDARG00000007788  | atp2b1b           | 208  | 58   | -1,71 | 6,31E-03 |
| ENSDARG00000086645  | hs3st3b1b         | 2529 | 758  | -1,71 | 1,61E-07 |
| ENSDARG00000025428  | socs3a            | 1420 | 388  | -1,72 | 1,17E-02 |
| ENSDARG00000102332  | spint1a           | 366  | 107  | -1,72 | 9,66E-06 |
| ENSDARG000000037921 | gng13b            | 1309 | 388  | -1,72 | 9,42E-07 |
| ENSDARG000000089156 | egr3              | 35   | 10   | -1,73 | 1,27E-02 |
| ENSDARG00000058226  | ak3               | 489  | 143  | -1,73 | 3,32E-05 |
| ENSDARG00000019062  | arpc5b            | 968  | 285  | -1,73 | 1,10E-06 |
| ENSDARG00000016412  | agt               | 173  | 48   | -1,74 | 2,90E-03 |
| ENSDARG00000096902  | si:ch211-180n24.3 | 22   | 6    | -1,74 | 1,58E-02 |
| ENSDARG00000115646  | CR846082.1        | 46   | 13   | -1,74 | 1,56E-03 |
| ENSDARG00000010572  | slc25a25a         | 423  | 122  | -1,74 | 3,36E-05 |
| ENSDARG00000056267  | dixdc1b           | 274  | 79   | -1,75 | 1,20E-08 |
| ENSDARG00000059972  | raly              | 542  | 148  | -1,75 | 1,62E-02 |
| ENSDARG00000102312  | scn12ab           | 101  | 29   | -1,75 | 6,88E-04 |
| ENSDARG00000031336  | hsd20b2           | 111  | 29   | -1,76 | 1,07E-02 |
| ENSDARG00000055159  | cyp27a1.4         | 77   | 21   | -1,77 | 3,81E-03 |
| ENSDARG00000001909  | vill              | 176  | 46   | -1,77 | 2,47E-02 |
| ENSDARG00000077948  | usp54a            | 534  | 154  | -1,78 | 8,15E-09 |

|                     |                   |      |      |       |          |
|---------------------|-------------------|------|------|-------|----------|
| ENSDARG00000110186  | CDCP1             | 102  | 28   | -1,78 | 9,45E-04 |
| ENSDARG00000029072  | klf6a             | 119  | 32   | -1,78 | 1,54E-03 |
| ENSDARG00000076144  | si:ch211-74m13.3  | 36   | 9    | -1,78 | 2,57E-02 |
| ENSDARG00000088251  | si:ch211-24o10.6  | 55   | 12   | -1,79 | 4,02E-02 |
| ENSDARG00000069708  | cdc34a            | 133  | 37   | -1,79 | 1,96E-04 |
| ENSDARG00000103114  | ndufa4l2a         | 6200 | 1677 | -1,79 | 5,26E-03 |
| ENSDARG00000062220  | plekha7b          | 126  | 36   | -1,79 | 4,59E-06 |
| ENSDARG00000039133  | lamb4             | 38   | 10   | -1,80 | 4,68E-02 |
| ENSDARG00000099841  | PRKCA             | 189  | 52   | -1,80 | 2,60E-04 |
| ENSDARG00000023214  | mob2a             | 38   | 10   | -1,80 | 1,13E-02 |
| ENSDARG00000069135  | ppp1r15a          | 1926 | 529  | -1,80 | 1,37E-04 |
| ENSDARG00000037154  | hivp3b            | 91   | 25   | -1,80 | 7,91E-04 |
| ENSDARG00000087196  | fibinb            | 189  | 51   | -1,80 | 1,76E-03 |
| ENSDARG00000024195  | znf395b           | 493  | 138  | -1,80 | 1,97E-07 |
| ENSDARG00000001656  | psmb13a           | 124  | 34   | -1,80 | 1,87E-04 |
| ENSDARG00000015278  | plxnc1            | 55   | 14   | -1,81 | 2,65E-02 |
| ENSDARG00000037852  | zgc:101663        | 68   | 18   | -1,81 | 2,35E-04 |
| ENSDARG00000038655  | ajap1             | 193  | 51   | -1,81 | 1,91E-03 |
| ENSDARG00000043006  | gnav1             | 29   | 8    | -1,81 | 2,67E-02 |
| ENSDARG00000036787  | tap2a             | 20   | 5    | -1,81 | 8,35E-03 |
| ENSDARG00000058939  | b4galnt3b         | 30   | 7    | -1,81 | 1,84E-03 |
| ENSDARG00000057665  | sprn2             | 636  | 174  | -1,81 | 4,43E-05 |
| ENSDARG00000074530  | KCNK12            | 39   | 10   | -1,82 | 4,02E-02 |
| ENSDARG00000013076  | bmi1b             | 211  | 56   | -1,82 | 1,19E-03 |
| ENSDARG00000088258  | CABZ01038494.1    | 172  | 46   | -1,82 | 1,53E-05 |
| ENSDARG00000008790  | actr3b            | 45   | 11   | -1,82 | 3,37E-03 |
| ENSDARG00000032708  | arl4cb            | 79   | 20   | -1,82 | 1,85E-02 |
| ENSDARG00000020594  | txlnba            | 24   | 6    | -1,82 | 3,49E-02 |
| ENSDARG00000051926  | plag1             | 43   | 11   | -1,83 | 3,52E-04 |
| ENSDARG00000013946  | ivns1abpb         | 137  | 36   | -1,84 | 3,06E-05 |
| ENSDARG00000068745  | map4l             | 755  | 210  | -1,84 | 1,37E-09 |
| ENSDARG00000078155  | INAVA             | 186  | 50   | -1,84 | 6,07E-04 |
| ENSDARG00000077341  | ppp1r14c          | 38   | 9    | -1,84 | 3,86E-02 |
| ENSDARG00000013628  | cd164             | 8651 | 2337 | -1,84 | 6,45E-06 |
| ENSDARG00000033614  | rasgef1ba         | 276  | 63   | -1,84 | 1,85E-02 |
| ENSDARG000000062575 | si:ch211-210g13.5 | 20   | 5    | -1,84 | 2,04E-02 |
| ENSDARG00000058260  | cip2a             | 51   | 12   | -1,84 | 3,37E-02 |
| ENSDARG00000056619  | arhgap42a         | 63   | 15   | -1,85 | 2,15E-02 |
| ENSDARG00000026611  | socs3b            | 372  | 93   | -1,86 | 2,35E-03 |
| ENSDARG00000070025  | dchs1a            | 295  | 70   | -1,86 | 1,47E-02 |
| ENSDARG00000039265  | arhgap4a          | 44   | 11   | -1,87 | 1,08E-03 |
| ENSDARG00000012340  | ptpn11b           | 169  | 44   | -1,87 | 2,54E-04 |
| ENSDARG00000112970  | BX571719.1        | 36   | 8    | -1,88 | 4,76E-02 |
| ENSDARG00000078186  | tex2              | 1032 | 277  | -1,89 | 6,49E-11 |
| ENSDARG00000013787  | gucy1a1           | 504  | 123  | -1,89 | 2,31E-02 |
| ENSDARG00000037917  | itga3a            | 79   | 17   | -1,89 | 4,19E-02 |
| ENSDARG00000090946  | si:zfos-364h11.1  | 27   | 6    | -1,89 | 4,29E-02 |
| ENSDARG00000098408  | stbd1             | 60   | 15   | -1,90 | 3,42E-03 |
| ENSDARG00000007179  | sash1a            | 221  | 57   | -1,91 | 1,52E-05 |
| ENSDARG00000060112  | sybu              | 160  | 36   | -1,92 | 1,17E-02 |
| ENSDARG000000044415 | tlr5a             | 197  | 47   | -1,92 | 2,07E-03 |
| ENSDARG000000004724 | tcea3             | 67   | 16   | -1,93 | 1,78E-03 |
| ENSDARG00000075163  | cxcl20            | 296  | 73   | -1,93 | 9,94E-05 |
| ENSDARG00000054842  | hsd17b14          | 128  | 32   | -1,93 | 1,66E-05 |
| ENSDARG00000011473  | calclra           | 558  | 143  | -1,93 | 2,87E-09 |
| ENSDARG00000003655  | tmem59l           | 330  | 79   | -1,93 | 1,05E-03 |
| ENSDARG00000029766  | nr1i2             | 262  | 65   | -1,94 | 5,25E-05 |
| ENSDARG00000076404  | mctp1a            | 224  | 55   | -1,94 | 3,26E-03 |
| ENSDARG00000076135  | mmrn2a            | 24   | 5    | -1,94 | 4,99E-02 |
| ENSDARG00000095152  | si:ch211-255i3.4  | 1229 | 314  | -1,94 | 3,57E-09 |
| ENSDARG00000037191  | ttr               | 58   | 14   | -1,95 | 3,56E-03 |
| ENSDARG00000089862  | si:dkey-16j16.4   | 154  | 39   | -1,96 | 3,86E-08 |
| ENSDARG00000075924  | zgc:171558        | 23   | 5    | -1,96 | 3,21E-02 |
| ENSDARG00000078523  | ddr1              | 364  | 84   | -1,97 | 1,63E-03 |
| ENSDARG00000074425  | si:busm1-57f23.1  | 433  | 96   | -1,97 | 6,11E-03 |

|                     |                  |       |      |       |          |
|---------------------|------------------|-------|------|-------|----------|
| ENSDARG00000032705  | foxg1b           | 30    | 5    | -1,97 | 4,14E-02 |
| ENSDARG00000071772  | si:ch211-253p2.2 | 393   | 97   | -1,97 | 1,20E-05 |
| ENSDARG00000019260  | dhrs9            | 26    | 5    | -1,97 | 4,97E-02 |
| ENSDARG00000057527  | mef2ab           | 96    | 23   | -1,98 | 3,44E-04 |
| ENSDARG00000044254  | anxa3b           | 52    | 11   | -1,98 | 1,76E-02 |
| ENSDARG00000008127  | pcdh15b          | 1133  | 276  | -1,99 | 7,38E-06 |
| ENSDARG00000007836  | ctsla            | 2605  | 632  | -1,99 | 2,34E-06 |
| ENSDARG00000105562  | si:dkey-23i12.7  | 63    | 14   | -1,99 | 4,73E-03 |
| ENSDARG00000071215  | palm3            | 352   | 86   | -1,99 | 1,74E-08 |
| ENSDARG00000034473  | ttyh3a           | 442   | 107  | -2,00 | 9,91E-07 |
| ENSDARG00000105450  | si:ch211-63p21.1 | 50    | 10   | -2,00 | 3,01E-02 |
| ENSDARG00000061120  | slc43a2b         | 4336  | 1068 | -2,00 | 1,48E-09 |
| ENSDARG00000045589  | kcnj8            | 204   | 43   | -2,01 | 2,79E-02 |
| ENSDARG00000062462  | shisa7a          | 21    | 4    | -2,02 | 3,03E-02 |
| ENSDARG00000103903  | LO017650.1       | 52    | 11   | -2,02 | 7,25E-03 |
| ENSDARG00000052336  | ociad2           | 54    | 12   | -2,03 | 1,94E-03 |
| ENSDARG00000039974  | rai14            | 37    | 7    | -2,05 | 9,77E-03 |
| ENSDARG00000038428  | sulf1            | 490   | 104  | -2,05 | 4,21E-03 |
| ENSDARG00000013613  | anxa13l          | 566   | 123  | -2,05 | 1,48E-03 |
| ENSDARG00000045753  | tmtc2a           | 38    | 7    | -2,06 | 2,12E-02 |
| ENSDARG00000074827  | si:ch73-184c24.1 | 182   | 39   | -2,06 | 1,18E-03 |
| ENSDARG00000015985  | abcc9            | 217   | 48   | -2,06 | 1,76E-03 |
| ENSDARG00000063416  | ptprk            | 189   | 43   | -2,06 | 7,96E-05 |
| ENSDARG00000031348  | mc5ra            | 1017  | 227  | -2,06 | 7,53E-05 |
| ENSDARG00000026052  | ccdc3a           | 55    | 10   | -2,06 | 8,35E-03 |
| ENSDARG00000101495  | ugt5b3           | 22    | 4    | -2,08 | 1,35E-02 |
| ENSDARG00000112100  | neto2b           | 17    | 4    | -2,09 | 1,21E-02 |
| ENSDARG00000102724  | zgc:153039       | 47    | 9    | -2,09 | 1,04E-02 |
| ENSDARG00000021352  | gria1a           | 341   | 69   | -2,10 | 1,69E-02 |
| ENSDARG00000098112  | btc              | 1723  | 391  | -2,10 | 2,99E-08 |
| ENSDARG00000069427  | nkain2           | 29    | 5    | -2,10 | 1,79E-02 |
| ENSDARG00000095415  | si:ch211-202f5.2 | 69    | 14   | -2,10 | 1,81E-03 |
| ENSDARG00000052242  | aff2             | 33    | 6    | -2,11 | 2,93E-02 |
| ENSDARG00000042188  | ttc38            | 21    | 4    | -2,12 | 1,27E-02 |
| ENSDARG00000037320  | fam131c          | 593   | 131  | -2,13 | 1,86E-06 |
| ENSDARG000000057107 | si:ch73-383g2.1  | 47    | 8    | -2,13 | 3,54E-02 |
| ENSDARG00000097371  | mcf2b            | 33    | 6    | -2,13 | 2,85E-02 |
| ENSDARG00000030269  | grtp1b           | 47    | 9    | -2,14 | 1,07E-02 |
| ENSDARG00000015355  | fosl1a           | 2740  | 585  | -2,14 | 1,50E-05 |
| ENSDARG00000043180  | gpd1b            | 3597  | 799  | -2,15 | 2,09E-13 |
| ENSDARG00000053190  | galnt16          | 130   | 26   | -2,15 | 4,23E-04 |
| ENSDARG00000009142  | ppp1r13bb        | 740   | 163  | -2,15 | 5,64E-11 |
| ENSDARG00000014910  | panx1b           | 229   | 48   | -2,16 | 9,95E-05 |
| ENSDARG00000068128  | ppp1r15b         | 187   | 40   | -2,16 | 4,47E-05 |
| ENSDARG00000077799  | egr4             | 12308 | 2579 | -2,16 | 2,18E-05 |
| ENSDARG00000086374  | isg15            | 347   | 65   | -2,16 | 5,68E-03 |
| ENSDARG00000100104  | zgc:101785       | 72    | 13   | -2,17 | 1,51E-02 |
| ENSDARG00000106258  | SGCZ             | 26    | 5    | -2,17 | 7,97E-03 |
| ENSDARG00000106873  | LO018188.1       | 531   | 111  | -2,17 | 7,09E-06 |
| ENSDARG00000059523  | rims4            | 129   | 26   | -2,18 | 5,10E-04 |
| ENSDARG00000036840  | krt15            | 585   | 119  | -2,18 | 2,76E-04 |
| ENSDARG00000070903  | met              | 177   | 37   | -2,19 | 1,11E-04 |
| ENSDARG00000056704  | zgc:91818        | 208   | 40   | -2,19 | 5,57E-03 |
| ENSDARG00000089162  | afap1l1a         | 279   | 58   | -2,19 | 1,44E-05 |
| ENSDARG00000060532  | adam22           | 242   | 47   | -2,19 | 6,48E-04 |
| ENSDARG00000007751  | lmnl3            | 184   | 37   | -2,20 | 3,19E-04 |
| ENSDARG00000024540  | tspan36          | 1781  | 366  | -2,20 | 8,04E-06 |
| ENSDARG00000108535  | CABZ01072077.1   | 74    | 13   | -2,21 | 1,32E-02 |
| ENSDARG00000001807  | tnfrsf21         | 646   | 137  | -2,21 | 1,92E-09 |
| ENSDARG00000028213  | ttn.2            | 40    | 4    | -2,21 | 1,56E-02 |
| ENSDARG00000062501  | hhipl1           | 55    | 10   | -2,21 | 3,15E-02 |
| ENSDARG00000078468  | fap              | 51    | 9    | -2,22 | 7,67E-03 |
| ENSDARG00000002196  | bach1b           | 206   | 42   | -2,22 | 4,25E-07 |
| ENSDARG00000097503  | si:ch73-288o11.5 | 241   | 46   | -2,22 | 4,03E-03 |
| ENSDARG00000051915  | pde5ab           | 69    | 13   | -2,23 | 9,93E-04 |

|                    |                   |         |        |       |          |
|--------------------|-------------------|---------|--------|-------|----------|
| ENSDARG00000060253 | si:ch211-216b21.2 | 41      | 7      | -2,24 | 3,61E-03 |
| ENSDARG00000027355 | slc25a4           | 39      | 7      | -2,24 | 3,42E-02 |
| ENSDARG00000007370 | dysf              | 46      | 8      | -2,24 | 5,10E-03 |
| ENSDARG00000010250 | nqo1              | 52      | 9      | -2,26 | 1,27E-02 |
| ENSDARG00000070423 | zgc:153157        | 99      | 18     | -2,26 | 5,88E-04 |
| ENSDARG00000045485 | rassf8b           | 66      | 13     | -2,27 | 1,01E-05 |
| ENSDARG00000101348 | plppr5b           | 576     | 114    | -2,27 | 5,18E-07 |
| ENSDARG00000093458 | si:dkey-76d14.2   | 21      | 4      | -2,30 | 7,55E-03 |
| ENSDARG00000099195 | ier2a             | 14915   | 2870   | -2,31 | 3,23E-07 |
| ENSDARG00000093549 | selenop           | 503     | 78     | -2,31 | 2,08E-02 |
| ENSDARG00000018404 | krt18             | 2850    | 535    | -2,31 | 8,79E-06 |
| ENSDARG00000075017 | myzap             | 344     | 64     | -2,33 | 6,05E-06 |
| ENSDARG00000012555 | ak5               | 437     | 66     | -2,33 | 9,78E-03 |
| ENSDARG00000093193 | chia.6            | 172     | 29     | -2,33 | 3,25E-03 |
| ENSDARG00000038235 | pkdccb            | 45      | 7      | -2,33 | 3,46E-03 |
| ENSDARG00000013317 | pygmb             | 220     | 40     | -2,34 | 2,53E-05 |
| ENSDARG00000055302 | grid2             | 109     | 15     | -2,34 | 1,88E-02 |
| ENSDARG00000031702 | prkg1b            | 38      | 4      | -2,35 | 8,41E-03 |
| ENSDARG00000075706 | si:ch211-106h4.9  | 361     | 63     | -2,36 | 7,67E-04 |
| ENSDARG00000098588 | gchfr             | 1892    | 352    | -2,36 | 2,71E-07 |
| ENSDARG00000089790 | efna5a            | 56      | 8      | -2,36 | 6,34E-03 |
| ENSDARG00000116487 | CABZ01039304.1    | 160     | 28     | -2,37 | 2,38E-04 |
| ENSDARG00000074698 | sdsi              | 81      | 13     | -2,37 | 2,09E-03 |
| ENSDARG00000004218 | rnd1b             | 323     | 53     | -2,38 | 3,85E-03 |
| ENSDARG00000035350 | ins               | 2313357 | 398302 | -2,38 | 5,06E-03 |
| ENSDARG00000057630 | galm              | 45      | 7      | -2,38 | 1,45E-03 |
| ENSDARG00000059923 | slc25a47a         | 22      | 4      | -2,39 | 3,01E-03 |
| ENSDARG00000031600 | rd3               | 64      | 10     | -2,40 | 1,61E-03 |
| ENSDARG00000017780 | rorcb             | 75      | 11     | -2,42 | 7,61E-03 |
| ENSDARG00000087084 | hcar1-4           | 34      | 4      | -2,42 | 5,27E-03 |
| ENSDARG00000057698 | ctsd              | 4067    | 731    | -2,43 | 2,99E-10 |
| ENSDARG00000057062 | si:dkey-157g16.6  | 18      | 3      | -2,43 | 3,75E-03 |
| ENSDARG00000077641 | thbs3a            | 81      | 13     | -2,46 | 1,51E-03 |
| ENSDARG00000054323 | pparab            | 79      | 14     | -2,46 | 1,54E-06 |
| ENSDARG00000014462 | rab3c             | 1477    | 262    | -2,47 | 5,06E-14 |
| ENSDARG00000086851 | si:dkey-264d12.5  | 87      | 11     | -2,47 | 5,49E-03 |
| ENSDARG00000102096 | adra2b            | 114     | 18     | -2,47 | 6,81E-03 |
| ENSDARG00000053381 | plpp1a            | 145     | 24     | -2,48 | 2,81E-06 |
| ENSDARG00000061421 | FQ311928.1        | 92      | 14     | -2,48 | 7,24E-04 |
| ENSDARG00000021948 | tnc               | 333     | 50     | -2,48 | 1,24E-04 |
| ENSDARG00000020693 | sesn1             | 751     | 118    | -2,50 | 4,83E-05 |
| ENSDARG00000077465 | sorcs2            | 55      | 6      | -2,50 | 3,58E-03 |
| ENSDARG00000013838 | sulf2b            | 56      | 8      | -2,50 | 1,12E-03 |
| ENSDARG00000042840 | eml1              | 19      | 1      | -2,50 | 1,10E-02 |
| ENSDARG00000095674 | tmem123           | 23      | 3      | -2,50 | 9,94E-03 |
| ENSDARG00000101457 | cdc42ep4a         | 371     | 58     | -2,51 | 5,25E-05 |
| ENSDARG00000063621 | aadac             | 46      | 7      | -2,52 | 6,94E-03 |
| ENSDARG00000041607 | eif4ebp3l         | 69      | 9      | -2,52 | 2,11E-03 |
| ENSDARG00000104259 | CABZ01072885.1    | 57      | 8      | -2,53 | 1,34E-04 |
| ENSDARG00000089217 | ubap1la           | 22      | 3      | -2,54 | 4,91E-03 |
| ENSDARG00000057017 | slc6a4b           | 39      | 5      | -2,55 | 3,32E-03 |
| ENSDARG00000093019 | si:dkey-83k24.5   | 150     | 18     | -2,56 | 7,77E-03 |
| ENSDARG00000019728 | bmpr1aa           | 1058    | 172    | -2,59 | 1,46E-13 |
| ENSDARG00000071250 | tmem79a           | 21      | 3      | -2,61 | 2,07E-03 |
| ENSDARG00000073684 | quo               | 72      | 9      | -2,61 | 1,46E-02 |
| ENSDARG00000091111 | si:ch211-15b10.6  | 54      | 6      | -2,62 | 1,87E-03 |
| ENSDARG00000034368 | hexb              | 969     | 150    | -2,64 | 4,32E-12 |
| ENSDARG00000086300 | si:ch211-236d3.4  | 54      | 7      | -2,66 | 1,65E-03 |
| ENSDARG00000099728 | zgc:56622         | 55      | 8      | -2,66 | 5,11E-05 |
| ENSDARG00000059001 | pim2              | 402     | 56     | -2,67 | 1,44E-05 |
| ENSDARG00000105088 | tenm4             | 37      | 5      | -2,69 | 8,16E-04 |
| ENSDARG00000005989 | rgl1              | 138     | 18     | -2,69 | 3,63E-05 |
| ENSDARG00000079895 | ehbp1l1b          | 33      | 4      | -2,70 | 1,54E-03 |
| ENSDARG00000100475 | fgf10b            | 69      | 7      | -2,74 | 2,81E-02 |
| ENSDARG00000044098 | egr2a             | 73      | 8      | -2,74 | 4,56E-04 |

|                     |                    |      |     |       |          |
|---------------------|--------------------|------|-----|-------|----------|
| ENSDARG00000098312  | scarb2a            | 493  | 56  | -2,74 | 5,01E-03 |
| ENSDARG00000093931  | rflnb              | 98   | 13  | -2,74 | 2,67E-05 |
| ENSDARG00000068849  | fam83ha            | 293  | 37  | -2,76 | 2,03E-05 |
| ENSDARG00000094935  | si:dkey-58f10.11   | 34   | 4   | -2,78 | 1,21E-03 |
| ENSDARG00000026499  | ppm1e              | 113  | 15  | -2,78 | 1,11E-05 |
| ENSDARG00000078433  | spc25              | 140  | 16  | -2,81 | 8,85E-04 |
| ENSDARG00000027609  | hpn                | 737  | 93  | -2,82 | 4,36E-06 |
| ENSDARG00000020924  | myo1ca             | 36   | 4   | -2,82 | 1,43E-02 |
| ENSDARG00000042826  | egr2b              | 54   | 4   | -2,83 | 1,83E-03 |
| ENSDARG00000098777  | CU693379.1         | 34   | 4   | -2,84 | 1,01E-03 |
| ENSDARG00000077069  | srgn               | 47   | 4   | -2,86 | 1,25E-02 |
| ENSDARG00000094526  | ksr2               | 57   | 6   | -2,86 | 3,51E-03 |
| ENSDARG00000075249  | fam171a2a          | 68   | 7   | -2,91 | 7,73E-05 |
| ENSDARG00000059601  | map1aa             | 182  | 19  | -2,92 | 4,35E-05 |
| ENSDARG00000029036  | rab32a             | 89   | 9   | -2,93 | 3,95E-04 |
| ENSDARG00000043341  | npv4r              | 305  | 33  | -2,96 | 9,30E-05 |
| ENSDARG00000040841  | adra2a             | 322  | 31  | -2,97 | 5,06E-04 |
| ENSDARG00000076246  | prune              | 353  | 42  | -2,98 | 6,70E-09 |
| ENSDARG00000077217  | zgc:162184         | 60   | 6   | -2,98 | 4,18E-04 |
| ENSDARG00000007804  | gas6               | 29   | 2   | -2,98 | 1,61E-02 |
| ENSDARG00000052997  | sema4e             | 42   | 4   | -2,99 | 1,26E-04 |
| ENSDARG00000088143  | sema4gb            | 21   | 2   | -3,00 | 1,87E-03 |
| ENSDARG00000076828  | zgc:194101         | 144  | 1   | -3,02 | 1,00E-02 |
| ENSDARG00000021869  | rcan2              | 1258 | 144 | -3,02 | 5,42E-09 |
| ENSDARG00000069199  | zgc:172120         | 119  | 11  | -3,02 | 4,03E-04 |
| ENSDARG00000094557  | nupr1              | 1899 | 182 | -3,03 | 3,00E-04 |
| ENSDARG00000056656  | tspan18a           | 884  | 74  | -3,06 | 1,48E-03 |
| ENSDARG00000062147  | otc                | 563  | 58  | -3,07 | 2,38E-05 |
| ENSDARG00000002745  | tdh                | 848  | 87  | -3,07 | 4,25E-06 |
| ENSDARG00000102138  | foxa1              | 120  | 11  | -3,08 | 1,96E-04 |
| ENSDARG00000014927  | uts1               | 179  | 8   | -3,08 | 1,12E-03 |
| ENSDARG00000021137  | adgrv1             | 120  | 8   | -3,08 | 5,08E-04 |
| ENSDARG00000012449  | si:ch211-169p10.1  | 31   | 3   | -3,09 | 9,85E-05 |
| ENSDARG00000010318  | srpx               | 500  | 55  | -3,09 | 9,30E-09 |
| ENSDARG00000089529  | desi1b             | 28   | 2   | -3,11 | 1,29E-05 |
| ENSDARG00000052121  | rag2               | 109  | 10  | -3,13 | 1,50E-04 |
| ENSDARG00000017367  | rhbdf1b            | 77   | 7   | -3,16 | 9,80E-04 |
| ENSDARG00000070734  | dyrk4              | 48   | 4   | -3,17 | 2,43E-04 |
| ENSDARG00000054683  | prdm8b             | 34   | 3   | -3,20 | 8,30E-05 |
| ENSDARG00000020541  | ism1               | 40   | 3   | -3,20 | 1,87E-03 |
| ENSDARG00000079105  | mhc2dab            | 140  | 6   | -3,20 | 1,78E-02 |
| ENSDARG00000062672  | kcnj19b            | 995  | 92  | -3,22 | 3,18E-07 |
| ENSDARG00000071331  | ryr3               | 173  | 14  | -3,23 | 8,58E-06 |
| ENSDARG00000077162  | nwd2               | 211  | 21  | -3,24 | 3,50E-10 |
| ENSDARG00000040198  | fstl5              | 50   | 3   | -3,28 | 4,58E-04 |
| ENSDARG00000020953  | dnajb6b            | 238  | 22  | -3,28 | 1,13E-09 |
| ENSDARG00000005716  | olfml2ba           | 96   | 7   | -3,30 | 2,23E-04 |
| ENSDARG00000042277  | efnb3b             | 281  | 25  | -3,34 | 2,98E-07 |
| ENSDARG00000015536  | sox6               | 155  | 13  | -3,34 | 5,51E-07 |
| ENSDARG00000105059  | zgc:172282         | 94   | 7   | -3,34 | 2,51E-05 |
| ENSDARG000000076729 | myo9aa             | 94   | 7   | -3,34 | 5,89E-06 |
| ENSDARG00000093176  | zgc:55413          | 23   | 1   | -3,39 | 1,07E-02 |
| ENSDARG00000069560  | kcnh3              | 26   | 1   | -3,41 | 1,18E-02 |
| ENSDARG00000025667  | adgrb2             | 287  | 22  | -3,42 | 1,36E-05 |
| ENSDARG00000071596  | neto1l             | 225  | 17  | -3,45 | 1,46E-06 |
| ENSDARG00000074671  | npvx1l             | 115  | 6   | -3,46 | 5,81E-03 |
| ENSDARG00000073970  | mctp2b             | 411  | 32  | -3,46 | 5,08E-07 |
| ENSDARG00000058734  | prdx1              | 113  | 7   | -3,47 | 6,99E-05 |
| ENSDARG00000093748  | si:ch211-217k17.11 | 32   | 0   | -3,47 | 1,47E-02 |
| ENSDARG00000089362  | grn1               | 339  | 22  | -3,50 | 5,43E-05 |
| ENSDARG00000037097  | slc7a2             | 3190 | 235 | -3,51 | 1,19E-06 |
| ENSDARG00000042861  | ltk                | 79   | 5   | -3,52 | 8,62E-05 |
| ENSDARG00000017739  | ak5l               | 1380 | 101 | -3,54 | 1,46E-07 |
| ENSDARG00000098113  | CABZ01007222.1     | 111  | 6   | -3,55 | 2,09E-04 |
| ENSDARG00000102050  | LO017850.1         | 99   | 6   | -3,58 | 8,75E-05 |

|                    |                   |      |     |       |          |
|--------------------|-------------------|------|-----|-------|----------|
| ENSDARG00000056603 | mcf2b             | 213  | 10  | -3,59 | 3,52E-04 |
| ENSDARG00000099411 | zgc:158343        | 176  | 10  | -3,59 | 6,60E-05 |
| ENSDARG00000034522 | rab6ba            | 24   | 1   | -3,61 | 1,54E-03 |
| ENSDARG00000040528 | lgals3bpb         | 23   | 1   | -3,63 | 2,13E-03 |
| ENSDARG00000004782 | fgfr3             | 227  | 16  | -3,64 | 5,01E-08 |
| ENSDARG00000097209 | cox8b             | 453  | 26  | -3,66 | 2,20E-06 |
| ENSDARG00000007356 | fgf20a            | 32   | 2   | -3,68 | 2,44E-04 |
| ENSDARG00000061752 | ripor2            | 23   | 1   | -3,68 | 2,06E-03 |
| ENSDARG00000017388 | gstt1b            | 60   | 3   | -3,68 | 8,41E-06 |
| ENSDARG00000041959 | cxcr4b            | 37   | 0   | -3,70 | 1,89E-02 |
| ENSDARG00000034718 | tfpia             | 173  | 6   | -3,71 | 7,31E-05 |
| ENSDARG00000025914 | si:dkey-190g11.3  | 48   | 2   | -3,72 | 8,80E-05 |
| ENSDARG00000002564 | syng1a            | 75   | 4   | -3,73 | 7,76E-06 |
| ENSDARG00000104068 | gstp1             | 4154 | 285 | -3,73 | 1,13E-10 |
| ENSDARG00000036074 | cebpa             | 33   | 1   | -3,75 | 2,16E-03 |
| ENSDARG00000031598 | calb1             | 250  | 13  | -3,76 | 2,94E-04 |
| ENSDARG00000035852 | cart3             | 44   | 1   | -3,76 | 8,89E-04 |
| ENSDARG00000076858 | TCIM (1 of many)  | 131  | 7   | -3,77 | 2,19E-05 |
| ENSDARG00000056230 | ghsra             | 134  | 8   | -3,77 | 7,12E-07 |
| ENSDARG00000088911 | cb1n17            | 135  | 8   | -3,79 | 2,04E-07 |
| ENSDARG00000077826 | efcc1             | 65   | 3   | -3,80 | 5,87E-05 |
| ENSDARG00000045066 | entpd1            | 92   | 4   | -3,83 | 3,73E-04 |
| ENSDARG00000016718 | mmp11b            | 393  | 24  | -3,85 | 8,90E-10 |
| ENSDARG00000101209 | lamb1a            | 241  | 13  | -3,85 | 1,40E-06 |
| ENSDARG00000020771 | tnr               | 51   | 3   | -3,87 | 9,91E-05 |
| ENSDARG00000074781 | ptprt             | 166  | 4   | -3,87 | 8,53E-03 |
| ENSDARG00000063437 | wnt9a             | 226  | 7   | -3,88 | 4,05E-05 |
| ENSDARG00000099129 | phlda1            | 93   | 5   | -3,90 | 7,39E-07 |
| ENSDARG00000092600 | si:dkey-256e7.5   | 37   | 1   | -3,91 | 1,00E-03 |
| ENSDARG00000043662 | cnih2             | 44   | 2   | -3,94 | 1,05E-05 |
| ENSDARG00000106669 | CABZ01068358.1    | 446  | 24  | -3,95 | 1,69E-08 |
| ENSDARG00000076799 | rnd3a             | 26   | 1   | -3,96 | 9,71E-04 |
| ENSDARG00000061665 | hcn2b             | 148  | 8   | -3,97 | 3,66E-07 |
| ENSDARG00000038814 | myrip             | 247  | 12  | -3,99 | 1,10E-06 |
| ENSDARG00000099238 | rasd4             | 2520 | 105 | -4,01 | 8,30E-05 |
| ENSDARG00000103638 | CR936977.2        | 21   | 0   | -4,02 | 6,10E-03 |
| ENSDARG00000010946 | cbsb              | 2089 | 107 | -4,05 | 4,22E-09 |
| ENSDARG00000099387 | jpt1a             | 108  | 4   | -4,05 | 4,41E-06 |
| ENSDARG00000045486 | pawr              | 122  | 7   | -4,06 | 3,76E-10 |
| ENSDARG00000114920 | TTC28             | 138  | 5   | -4,08 | 8,04E-06 |
| ENSDARG00000002576 | cabp5a            | 51   | 1   | -4,10 | 4,09E-04 |
| ENSDARG00000004111 | esr1              | 1145 | 57  | -4,16 | 2,85E-11 |
| ENSDARG00000070110 | opn5              | 40   | 1   | -4,16 | 2,70E-05 |
| ENSDARG00000070228 | cdk6              | 43   | 2   | -4,16 | 4,57E-06 |
| ENSDARG00000090140 | tmem196b          | 385  | 20  | -4,17 | 1,14E-10 |
| ENSDARG00000053301 | insm1b            | 871  | 36  | -4,18 | 6,88E-08 |
| ENSDARG00000001733 | gupa1a            | 24   | 0   | -4,19 | 8,97E-05 |
| ENSDARG00000077709 | iqsec2b           | 446  | 20  | -4,21 | 8,79E-09 |
| ENSDARG00000075905 | si:ch211-266g18.9 | 25   | 0   | -4,26 | 2,09E-02 |
| ENSDARG00000039240 | cacng5b           | 48   | 1   | -4,30 | 6,83E-04 |
| ENSDARG00000006025 | tp53i11b          | 24   | 0   | -4,31 | 3,25E-03 |
| ENSDARG00000056228 | pld1a             | 154  | 6   | -4,31 | 1,76E-09 |
| ENSDARG00000007490 | adrb1             | 37   | 0   | -4,33 | 1,69E-05 |
| ENSDARG00000060626 | dgkaa             | 1135 | 41  | -4,33 | 2,31E-06 |
| ENSDARG00000057479 | hrh2b             | 733  | 24  | -4,34 | 2,20E-06 |
| ENSDARG00000034504 | lmo1              | 809  | 25  | -4,38 | 6,09E-07 |
| ENSDARG00000097055 | si:ch211-284f22.3 | 44   | 1   | -4,39 | 2,04E-05 |
| ENSDARG00000011673 | si:ch211-246m6.5  | 83   | 2   | -4,40 | 1,52E-04 |
| ENSDARG00000036816 | pou2f2a           | 299  | 10  | -4,41 | 3,49E-08 |
| ENSDARG00000012204 | CDK18             | 206  | 8   | -4,44 | 8,08E-09 |
| ENSDARG00000035942 | hrh3              | 424  | 16  | -4,49 | 3,51E-11 |
| ENSDARG00000007461 | srgap1a           | 138  | 4   | -4,50 | 1,11E-08 |
| ENSDARG00000063538 | kalrnb            | 830  | 27  | -4,51 | 4,22E-08 |
| ENSDARG00000010727 | ttyh2l            | 315  | 9   | -4,51 | 4,81E-07 |
| ENSDARG00000030905 | cited2            | 23   | 0   | -4,67 | 5,28E-05 |

|                    |                  |      |     |       |          |
|--------------------|------------------|------|-----|-------|----------|
| ENSDARG00000103498 | epd              | 375  | 2   | -4,69 | 2,58E-02 |
| ENSDARG00000041960 | si:ch211-173a9.6 | 127  | 0   | -4,72 | 1,17E-03 |
| ENSDARG00000116524 | zgc:103700       | 57   | 0   | -4,75 | 6,66E-04 |
| ENSDARG00000014670 | colgalt2         | 119  | 3   | -4,80 | 1,99E-06 |
| ENSDARG00000002847 | fndc1            | 24   | 0   | -4,83 | 7,49E-03 |
| ENSDARG00000076520 | mafb             | 1539 | 38  | -4,84 | 4,53E-08 |
| ENSDARG00000032565 | cacng2a          | 104  | 2   | -4,86 | 1,52E-07 |
| ENSDARG00000010083 | rbfox3a          | 325  | 8   | -4,88 | 9,13E-09 |
| ENSDARG00000021584 | cntn5            | 266  | 6   | -4,91 | 5,08E-07 |
| ENSDARG00000013926 | slc16a9a         | 435  | 10  | -4,95 | 1,30E-08 |
| ENSDARG00000035468 | slc25a25b        | 822  | 19  | -4,97 | 3,97E-10 |
| ENSDARG00000029372 | rasa4            | 623  | 15  | -5,03 | 3,76E-10 |
| ENSDARG00000079876 | CU855878.1       | 1013 | 22  | -5,04 | 7,38E-10 |
| ENSDARG00000062821 | slc6a15          | 116  | 1   | -5,06 | 8,03E-05 |
| ENSDARG00000013082 | uap1l1           | 583  | 12  | -5,17 | 4,70E-11 |
| ENSDARG00000112040 | CR774179.5       | 376  | 4   | -5,19 | 1,81E-07 |
| ENSDARG00000088202 | sh3d19           | 576  | 11  | -5,20 | 7,07E-10 |
| ENSDARG00000051939 | pcxb             | 8566 | 152 | -5,29 | 3,16E-09 |
| ENSDARG00000074372 | elfn1b           | 93   | 1   | -5,37 | 1,22E-05 |
| ENSDARG00000099791 | pdk3b            | 57   | 1   | -5,47 | 5,22E-08 |
| ENSDARG00000104022 | gcgra            | 155  | 3   | -5,52 | 2,11E-06 |
| ENSDARG00000035544 | etnppl           | 1594 | 25  | -5,53 | 3,45E-10 |
| ENSDARG00000077866 | nostrin          | 109  | 2   | -5,56 | 4,33E-09 |
| ENSDARG00000103750 | si:ch211-246m6.5 | 530  | 7   | -5,63 | 1,22E-09 |
| ENSDARG00000032435 | itga9            | 289  | 4   | -5,67 | 3,04E-10 |
| ENSDARG00000027584 | ttpa             | 647  | 4   | -5,81 | 2,95E-05 |
| ENSDARG00000100336 | zgc:158654       | 367  | 1   | -5,85 | 6,04E-04 |
| ENSDARG00000043010 | camk2d1          | 502  | 5   | -6,04 | 5,40E-10 |
| ENSDARG00000060637 | clstn2           | 602  | 4   | -6,44 | 3,50E-10 |
| ENSDARG00000021186 | si:dkeyp-4h4.1   | 63   | 0   | -6,54 | 1,38E-04 |
| ENSDARG00000076401 | cacng3b          | 361  | 2   | -6,60 | 1,68E-09 |
| ENSDARG00000062449 | xpr1a            | 239  | 2   | -6,68 | 1,60E-11 |
| ENSDARG00000069459 | si:dkey-6n21.13  | 247  | 1   | -6,70 | 3,58E-09 |
| ENSDARG00000035984 | mnx1             | 1808 | 10  | -6,92 | 3,83E-13 |
| ENSDARG00000078768 | abhd15a          | 4014 | 15  | -6,94 | 3,66E-09 |
| ENSDARG00000039576 | fstl1b           | 1644 | 6   | -6,99 | 3,50E-10 |
| ENSDARG00000088708 | ngfra            | 963  | 5   | -7,18 | 3,90E-13 |
| ENSDARG00000104735 | nkx6.2           | 1025 | 0   | -9,84 | 1,13E-10 |
