# Supplementary material for: A δ-cell subpopulation with a pro-β-cell identity contributes to efficient age-independent recovery in a zebrafish model of diabetes
Source: eLife journal article supplement (doi:10.7554/elife.67576), 2022-01-21
Supplement: supp [file elife-67576-supp-v1.zip › elife_poa_e67576_Figure_3_source_data_2.pdf]

### Figure 3-Source Data 2. $\beta$ -cell markers from Tarifeño-Saldivia et al (2017)

$\beta$ -cell markers enriched >4-fold versus the other main pancreatic cell types,  $\alpha$ -, sst2  $\delta$ -, acinar and duct, based on RNAseq data from Tarifeño-Saldivia 2017 and mapped on more recent GRCz11 v92

ins  
ppdpfb  
ndufa4l2a  
g6pcb  
tagln3b  
wif1  
pcdh10a  
kcnj2a  
ca7  
fstl1b  
esr1  
nptna  
zgc:154058  
ucn3l  
ca12  
rasd4  
klb  
prkdc  
otc  
dpp6b  
tmtc1  
tmeff2a  
man2c1  
prkcbb  
srpx  
nkx6.2  
ngfra  
fgfr1b  
cntn4  
tmem163a  
rrad  
CABZ01085139.1  
ace  
slc38a11  
grapb  
rnd1b  
stmn4  
nkx3.2  
ppox  
fstl1a  
plxnb3  
npm2a  
cacng3b  
cart3  
gabrb4  
iqsec2b  
nlgn4b  
CSMD3 (1 of many)  
LO017650.1  
snx8b  
chrm5a  
pnocb  
si:dkey-215k6.1  
hcn1  
zgc:91818  
arvcfa  
grin2bb  
bcl2b  
zgc:158260  
runx2a  
si:ch211-242f23.3  
orcb
