# Supplementary material for: A δ-cell subpopulation with a pro-β-cell identity contributes to efficient age-independent recovery in a zebrafish model of diabetes
Source: eLife journal article supplement (doi:10.7554/elife.67576), 2022-01-21
Supplement: supp [file elife-67576-supp-v1.zip › elife_poa_e67576_Figure_3_source_data_3.pdf]

### Figure 3-Source Data 3. Gene Ontology analysis and pathways overrepresented in bihormonal cells

GO from genes overexpressed in 20dpt bihormonal cells versus CTL Beta (DESeq FC>2x, Padj<0.05)  
GO Padj (FDR) <0.25

#### Biological Process (non redundant)

| geneSet    | description                                   | enrichmentRatio | pValue     | FDR        | userId                                                                                                                                                                                                      |
|------------|-----------------------------------------------|-----------------|------------|------------|-------------------------------------------------------------------------------------------------------------------------------------------------------------------------------------------------------------|
| GO:0022610 | biological adhesion                           | 2,544078307     | 1,54E-05   | 0,00438131 | adora2b;dlg1;cdh4;ek1;pcdh19;arrb1;nrxn3a;ret;epdl2;cdh10a;plxna2;emilin2a;nlg3b;nrxn3b;pcdh1a;celsr1a;epdl1;nlg2a;nlg1;runx1;pcdh15a;vstm2l;pcdh10b;itga4;inpp1a                                           |
| GO:0099504 | synaptic vesicle cycle                        | 4,358854167     | 4,15E-04   | 0,0589034  | dnm1b;syt4;syt11b;snap25b;nlg3b;si:ch211-81a5.8;nlg2a;nlg1                                                                                                                                                  |
| GO:0050808 | synapse organization                          | 4,10245098      | 6,34E-04   | 0,05998269 | dlg1;bdnf;npas4a;nlg3b;nlg2a;nlg1;pclob;gphnb                                                                                                                                                               |
| GO:0051336 | regulation of hydrolase activity              | 1,879266467     | 0,00213353 | 0,15148057 | llgl1;fgfr1a;iqsec1b;sh3bp4a;ek1;crim1;serpini1;atp1b2b;ppp1r14ba;ppp1r3b;bik;c3a.3;si:dkey-191g9.5;serping1;srgap3;plxna2;elmod1;ppp2r2cb;syngap1b;arhgap32b;dab2ipb;myo9b;si:dkey-117n7.5;abr             |
| GO:0009887 | animal organ morphogenesis                    | 1,683677575     | 0,00339133 | 0,16502121 | sox9a;ispd;slc35b2;mef2cb;fgfr1a;slc26a2;cdh4;ptch1;bcor;atp2a2a;crim1;dnmt1;pcdh19;atp1b2b;prickle1a;notch2;ostn;ngs;slc8a4a;ret;lgi1b;plxna2;myom1a;syngap1b;hoxc4a;lrrc39;fhl1a;sox11a;insm1a;pim1       |
| GO:0072358 | cardiovascular system development             | 1,838238818     | 0,00421576 | 0,16502121 | dlc;vash2;syk;hey2;iqsec1b;crim1;aplnrb;notch2;nrxn3a;c1galt1a;npas4a;ackr3b;enox1;colec12;yjefn3;nrxn3b;dab2ipb;shc1;nlg1;runx1;mtbl;itga4                                                                 |
| GO:0048585 | negative regulation of response to stimulus   | 1,855458193     | 0,00461044 | 0,16502121 | fgfr1a;sema3b;ptch1;bcor;sh3bp4a;ek1;ephb2b;aplnrb;tle2a;sema3ga;arrb1;ret;serping1;sik1;tle3b;sesn2;dkk3b;dab2ipb;amer2;sox11a;inpp1a                                                                      |
| GO:0010648 | negative regulation of cell communication     | 1,94527376      | 0,00522955 | 0,16502121 | fgfr1a;ptch1;bcor;sh3bp4a;ek1;ephb2b;aplnrb;tle2a;arrb1;ret;sik1;tle3b;sesn2;dkk3b;dab2ipb;amer2;sox11a;inpp1a                                                                                              |
| GO:0007163 | establishment or maintenance of cell polarity | 2,827364865     | 0,00702175 | 0,19941759 | dlg1;llgl1;rhoub;rhoca;aplnrb;prickle1a;rnd2;cap2                                                                                                                                                           |
| GO:0040011 | locomotion                                    | 1,575489458     | 0,00865666 | 0,20511549 | nusap1;slc35b2;syk;sema3b;ek1;rhoca;mdga2a;tekt4;sst1.2;aplnrb;prickle1a;sema3ga;arrb1;tmsb;ret;ackr3b;srgap3;plxna2;rxfp3.3a1;celsr1a;chrm4a;rnd2;rhobtb1;rbpms2b;insm1a;vstm2l;efna3b;nsmfb;nr6a1a;inpp1a |
| GO:0035295 | tube development                              | 1,590022275     | 0,00866685 | 0,20511549 | dlc;sox9a;foxa2;vash2;syk;mef2cb;hey2;iqsec1b;bcor;cdc42se1;atp2a2a;dnmt1;pcdh19;aplnrb;prickle1a;nrxn3a;slc8a4a;c1galt1a;ackr3b;colec12;yjefn3;nrxn3b;polr3b;dab2ipb;shc1;nlg1;nr6a1a;mtbl;cldn15a         |

|            |                              |             |            |            |                                                                                                                   |
|------------|------------------------------|-------------|------------|------------|-------------------------------------------------------------------------------------------------------------------|
| GO:0060537 | muscle tissue development    | 2,196063931 | 0,01149092 | 0,24478239 | mef2cb;fgfr1a;plod2;myl7;npr1a;aplnrb;slc8a4a;ret;myom1a;lrrc39;gfra3                                             |
| GO:0030029 | actin filament-based process | 1,755863516 | 0,01206674 | 0,24478239 | dlg1;llgl1;rhoub;iqsec1b;myl7;ek1;rhoca;arpc1b;tpma;gas2l3;tmsb;myom1a;rnd2;lrrc39;gas7a;rhobtb1;frmd5;cnn1b;cap2 |

KEGG pathways

| geneSet  | description                        | enrichmentRatio | pValue     | FDR        | userId                                                                                               |
|----------|------------------------------------|-----------------|------------|------------|------------------------------------------------------------------------------------------------------|
| dre04270 | Vascular smooth muscle contraction | 2,420892909     | 0,00181354 | 0,22131854 | adora2b;itpr1a;ppp1r14ab;npr1b;prkcbb;cacna1fb;adra1d;npr1a;adcy7;prkceb;itpr1b;calml4a;adcy3a;adcy5 |
| dre04114 | Oocyte meiosis                     | 2,409696591     | 0,00273233 | 0,22131854 | itpr1a;igf1ra;pgr;ccnb1;plk1;adcy7;cpeb3;ywhag1;itpr1b;calml4a;adcy3a;adcy5;igf1                     |
