# Supplementary material for: A δ-cell subpopulation with a pro-β-cell identity contributes to efficient age-independent recovery in a zebrafish model of diabetes
Source: eLife journal article supplement (doi:10.7554/elife.67576), 2022-01-21
Supplement: supp [file elife-67576-supp-v1.zip › elife_poa_e67576_Figure_4_source_data_1.pdf]

Figure 4-Source Data 1

Cell counts in the pancreatic tail (adult zebrafish)

**Bihormonal mCherry+ GFP+ cells**

| <b>CTL</b> | <b>20dpt</b> |
|------------|--------------|
| 185        | 2810         |
| 123        | 691          |
| 288        | 1440         |
| 115        | 2446         |
| 54         | 1598         |

**Monohormonal mCherry+ (GFP-)  $\beta$ -cells**

| <b>CTL</b> | <b>20dpt</b> |
|------------|--------------|
| 3946       | 109          |
| 2190       | 76           |
| 1570       | 72           |
| 989        | 50           |
| 651        | 52           |
