# Supplementary material for: A δ-cell subpopulation with a pro-β-cell identity contributes to efficient age-independent recovery in a zebrafish model of diabetes
Source: eLife journal article supplement (doi:10.7554/elife.67576), 2022-01-21
Supplement: supp [file elife-67576-supp-v1.zip › elife_poa_e67576_Figure_4_source_data_2.pdf]

Figure 4-Source Data 2

Intraperitoneal Glucose Tolerance test (adults)

|            | CTL |     |     |     |     |     |
|------------|-----|-----|-----|-----|-----|-----|
| Time (min) |     |     |     |     |     |     |
| 0          | 55  | 58  | 57  | 87  | 59  | 69  |
| 60         | 394 | 368 | 380 | 371 | 439 | 456 |
| 180        | 119 | 202 | 231 | 81  | 410 | 232 |
| 240        | 92  | 66  | 234 | 63  |     |     |

|            | NFP (regenerated) |     |     |     |     |     |
|------------|-------------------|-----|-----|-----|-----|-----|
| Time (min) |                   |     |     |     |     |     |
| 0          | 65                | 67  | 118 | 111 | 102 | 142 |
| 60         | 364               | 271 | 372 | 459 | 489 | 467 |
| 180        | 82                | 74  | 91  | 100 | 158 | 222 |
| 240        | 103               | 91  | 78  | 119 |     |     |

|     |     |     |
|-----|-----|-----|
| 71  | 49  |     |
| 370 | 420 | 489 |
| 143 |     |     |

|     |     |     |
|-----|-----|-----|
| 71  | 87  |     |
| 409 | 462 |     |
| 384 | 213 | 229 |
