# Supplementary material for: A δ-cell subpopulation with a pro-β-cell identity contributes to efficient age-independent recovery in a zebrafish model of diabetes
Source: eLife journal article supplement (doi:10.7554/elife.67576), 2022-01-21
Supplement: supp [file elife-67576-supp-v1.zip › elife_poa_e67576_Figure_5_source_data_1.pdf]

**Figure 5-Source Data 1. Significant differentially expressed genes between GFPhigh and GFPlow  $\delta$ -cells**  
DESeq Padj<0.05

| Ensembl_ID           | Gene_Name         | Mean_<br>CTL_GFPhigh | Mean_<br>CTL_GFPlow | log2FC | Padj     |
|----------------------|-------------------|----------------------|---------------------|--------|----------|
| ENSDARG00000071209   | opr1l             | 0                    | 88                  | 5,27   | 4,19E-04 |
| ENSDARG00000006865   | glra4a            | 1                    | 180                 | 5,20   | 1,36E-04 |
| ENSDARG00000076280   | ppp1r1b           | 1                    | 355                 | 5,12   | 1,13E-04 |
| ENSDARG000000035120  | glc               | 2                    | 319                 | 5,08   | 5,87E-05 |
| ENSDARG00000005616   | bfb               | 1                    | 218                 | 5,04   | 3,30E-04 |
| ENSDARG00000075757   | gig2e             | 0                    | 341                 | 4,94   | 1,72E-04 |
| ENSDARG000000059438  | galnt18b          | 0                    | 76                  | 4,93   | 3,63E-04 |
| ENSDARG00000075718   | rpz5              | 5                    | 905                 | 4,92   | 6,58E-05 |
| ENSDARG00000028346   | tesca             | 0                    | 83                  | 4,84   | 4,76E-04 |
| ENSDARG000000046054  | CT027815.1        | 3                    | 329                 | 4,83   | 1,07E-04 |
| ENSDARG000000091513  | si:dkey-22o12.2   | 0                    | 153                 | 4,83   | 4,76E-04 |
| ENSDARG000000044501  | viml              | 0                    | 79                  | 4,82   | 1,45E-03 |
| ENSDARG00000112049   | cldn15a           | 2                    | 459                 | 4,82   | 1,07E-04 |
| ENSDARG00000010266   | igf2bp3           | 0                    | 56                  | 4,80   | 3,60E-04 |
| ENSDARG000000022971  | epha6             | 1                    | 108                 | 4,78   | 5,44E-04 |
| ENSDARG000000015869  | slc22a16          | 7                    | 699                 | 4,76   | 1,34E-04 |
| ENSDARG000000052713  | lrrtm1            | 15                   | 782                 | 4,76   | 2,18E-05 |
| ENSDARG000000061365  | hepacam2          | 15                   | 1510                | 4,76   | 1,35E-04 |
| ENSDARG000000089885  | slc16a12b         | 13                   | 1158                | 4,72   | 9,58E-05 |
| ENSDARG000000051876  | ush1c             | 4                    | 286                 | 4,72   | 4,75E-05 |
| ENSDARG000000037159  | opr1b             | 11                   | 1913                | 4,72   | 1,19E-04 |
| ENSDARG000000099111  | zgc:175280        | 0                    | 61                  | 4,72   | 1,10E-03 |
| ENSDARG000000035562  | mpdu1a            | 1                    | 119                 | 4,72   | 4,19E-04 |
| ENSDARG00000103679   | bmp16             | 5                    | 899                 | 4,72   | 1,14E-04 |
| ENSDARG000000057833  | gulp1b            | 26                   | 2415                | 4,71   | 1,29E-04 |
| ENSDARG000000044566  | fabp6             | 5                    | 1448                | 4,64   | 1,35E-04 |
| ENSDARG0000000087798 | pdyn              | 17                   | 2081                | 4,64   | 1,63E-04 |
| ENSDARG000000099850  | iqsec3a           | 0                    | 113                 | 4,63   | 6,53E-04 |
| ENSDARG000000062478  | ackr3a            | 0                    | 75                  | 4,62   | 5,37E-04 |
| ENSDARG00000110069   | pdgfaa            | 0                    | 90                  | 4,62   | 9,65E-04 |
| ENSDARG000000090297  | ldlr2             | 0                    | 60                  | 4,62   | 6,02E-04 |
| ENSDARG000000094511  | ccl20b            | 3                    | 988                 | 4,60   | 1,94E-04 |
| ENSDARG000000034718  | tfpia             | 3                    | 672                 | 4,59   | 1,34E-04 |
| ENSDARG00000007108   | lipia             | 1                    | 191                 | 4,58   | 8,53E-04 |
| ENSDARG000000035521  | sfrp1a            | 1                    | 95                  | 4,58   | 1,20E-03 |
| ENSDARG000000058961  | ngfa              | 0                    | 40                  | 4,58   | 1,17E-03 |
| ENSDARG00000100494   | pbx1a             | 7                    | 408                 | 4,58   | 6,58E-05 |
| ENSDARG000000068288  | lamc2             | 4                    | 870                 | 4,57   | 3,29E-04 |
| ENSDARG000000074723  | myo10l1           | 0                    | 62                  | 4,55   | 4,80E-04 |
| ENSDARG00000019856   | atp1a1b           | 21                   | 2290                | 4,53   | 3,80E-04 |
| ENSDARG00000101637   | ccnd1             | 7                    | 286                 | 4,53   | 3,66E-06 |
| ENSDARG000000017591  | fat1a             | 10                   | 868                 | 4,52   | 1,14E-04 |
| ENSDARG00000016470   | anxa5b            | 1                    | 68                  | 4,51   | 7,54E-04 |
| ENSDARG00000070917   | kitlga            | 1                    | 146                 | 4,51   | 7,54E-04 |
| ENSDARG000000089790  | efna5a            | 0                    | 110                 | 4,51   | 4,31E-04 |
| ENSDARG00000031228   | podxl             | 2                    | 196                 | 4,51   | 1,83E-04 |
| ENSDARG00000027088   | ptgdsb.1          | 0                    | 107                 | 4,49   | 1,42E-03 |
| ENSDARG00000036456   | anxa4             | 51                   | 4267                | 4,49   | 1,29E-04 |
| ENSDARG00000070110   | opn5              | 0                    | 71                  | 4,49   | 8,46E-04 |
| ENSDARG000000105153  | ifitm5            | 3                    | 499                 | 4,48   | 3,40E-04 |
| ENSDARG000000053542  | kctd12.2          | 523                  | 31726               | 4,48   | 2,34E-04 |
| ENSDARG000000092520  | si:dkey-250k15.10 | 0                    | 70                  | 4,48   | 1,20E-03 |
| ENSDARG00000101481   | rbp5              | 1                    | 64                  | 4,46   | 1,32E-04 |
| ENSDARG000000068144  | nmba              | 40                   | 3309                | 4,46   | 1,36E-04 |
| ENSDARG00000075542   | zfhx4             | 5                    | 269                 | 4,46   | 1,14E-04 |
| ENSDARG000000054239  | ghrl              | 276                  | 44119               | 4,46   | 1,68E-04 |
| ENSDARG000000058243  | phactr3a          | 0                    | 36                  | 4,46   | 1,16E-03 |
| ENSDARG000000033614  | rasgef1ba         | 57                   | 2908                | 4,45   | 1,07E-04 |
| ENSDARG00000002235   | mmp14a            | 0                    | 149                 | 4,45   | 1,10E-03 |
| ENSDARG00000020794   | neurod6b          | 0                    | 62                  | 4,45   | 8,00E-04 |
| ENSDARG00000102464   | wnt5b             | 0                    | 80                  | 4,44   | 7,63E-04 |
| ENSDARG000000096971  | si:dkey-206p8.1   | 37                   | 1674                | 4,44   | 9,27E-05 |
| ENSDARG00000022531   | ntn1b             | 0                    | 55                  | 4,44   | 1,34E-03 |
| ENSDARG00000034643   | fhl3a             | 1                    | 86                  | 4,43   | 3,63E-04 |
| ENSDARG000000057209  | plppr5a           | 4                    | 363                 | 4,43   | 1,07E-03 |
| ENSDARG000000051975  | cd99              | 11                   | 471                 | 4,42   | 8,69E-05 |
| ENSDARG000000069250  | uacaa             | 0                    | 98                  | 4,40   | 1,37E-03 |
| ENSDARG000000087349  | reep6             | 1                    | 129                 | 4,40   | 1,24E-03 |

|                     |                   |       |         |      |          |
|---------------------|-------------------|-------|---------|------|----------|
| ENSDARG00000105223  | pmp22a            | 3     | 436     | 4,39 | 6,01E-04 |
| ENSDARG00000116139  | cdx1b             | 23    | 1929    | 4,38 | 4,19E-04 |
| ENSDARG00000039577  | ptk2bb            | 0     | 46      | 4,38 | 1,21E-03 |
| ENSDARG00000054616  | cldni             | 80    | 9670    | 4,38 | 4,79E-04 |
| ENSDARG00000038794  | zgc:113531        | 2     | 117     | 4,37 | 6,39E-04 |
| ENSDARG00000070391  | tspan4b           | 4     | 524     | 4,37 | 4,19E-04 |
| ENSDARG00000077847  | olfm2a            | 34    | 3151    | 4,37 | 5,60E-04 |
| ENSDARG000000099260 | PITPNC1           | 8     | 1015    | 4,36 | 4,76E-04 |
| ENSDARG00000077573  | tmprss13b         | 1     | 127     | 4,35 | 8,95E-04 |
| ENSDARG00000053383  | rprma             | 4     | 514     | 4,34 | 3,63E-04 |
| ENSDARG00000093413  | edil3a            | 5     | 899     | 4,34 | 4,76E-04 |
| ENSDARG00000022727  | epha2b            | 0     | 59      | 4,32 | 2,23E-03 |
| ENSDARG000000061242 | tuft1a            | 6     | 338     | 4,30 | 3,29E-04 |
| ENSDARG00000074763  | mrp2a             | 41    | 2567    | 4,30 | 5,42E-04 |
| ENSDARG00000099184  | map2k6            | 572   | 17482   | 4,30 | 2,08E-05 |
| ENSDARG00000053358  | basp1             | 11    | 778     | 4,30 | 3,59E-04 |
| ENSDARG00000035253  | npr3              | 2     | 263     | 4,29 | 3,58E-04 |
| ENSDARG00000077817  | cxxc4             | 3     | 396     | 4,29 | 7,32E-04 |
| ENSDARG00000038424  | si:dkey-8k3.2     | 2     | 480     | 4,28 | 1,86E-04 |
| ENSDARG00000088157  | smoc2             | 4     | 647     | 4,28 | 7,92E-04 |
| ENSDARG00000021442  | cdh11             | 4     | 830     | 4,27 | 4,76E-04 |
| ENSDARG00000011163  | sema3fa           | 8     | 703     | 4,25 | 8,47E-04 |
| ENSDARG00000019260  | dhrs9             | 0     | 65      | 4,25 | 5,74E-04 |
| ENSDARG00000079484  | kcnt1             | 44    | 2475    | 4,25 | 5,47E-04 |
| ENSDARG000000112990 | BX897729.1        | 1     | 66      | 4,24 | 7,46E-04 |
| ENSDARG00000014190  | sst2              | 26197 | 1625452 | 4,23 | 5,29E-04 |
| ENSDARG00000092987  | zmat4a            | 0     | 92      | 4,23 | 1,87E-03 |
| ENSDARG00000031702  | prkg1b            | 6     | 583     | 4,22 | 6,02E-04 |
| ENSDARG00000043226  | nfixa             | 0     | 34      | 4,21 | 1,80E-03 |
| ENSDARG00000078853  | arhgef19          | 0     | 47      | 4,20 | 1,45E-03 |
| ENSDARG000000020708 | mdkb              | 54    | 3492    | 4,18 | 6,73E-04 |
| ENSDARG00000112993  | efnb3a            | 2     | 106     | 4,18 | 8,95E-04 |
| ENSDARG00000074865  | frmpd3            | 1     | 70      | 4,18 | 1,11E-03 |
| ENSDARG00000062510  | bcl11ba           | 0     | 25      | 4,18 | 1,44E-03 |
| ENSDARG00000039434  | oprml             | 0     | 28      | 4,17 | 1,11E-03 |
| ENSDARG00000077465  | sorcs2            | 11    | 604     | 4,17 | 5,39E-04 |
| ENSDARG00000013310  | map3k15           | 117   | 6810    | 4,17 | 6,86E-04 |
| ENSDARG00000090253  | zgc:113223        | 0     | 40      | 4,16 | 1,78E-03 |
| ENSDARG00000093739  | si:dkey-83m22.7   | 8     | 281     | 4,15 | 1,98E-04 |
| ENSDARG00000062967  | kcng4a            | 0     | 34      | 4,15 | 2,05E-03 |
| ENSDARG00000003706  | ryr2b             | 0     | 24      | 4,14 | 3,92E-03 |
| ENSDARG00000018303  | etv4              | 5     | 441     | 4,14 | 8,48E-04 |
| ENSDARG00000076499  | usp53b            | 0     | 21      | 4,14 | 1,30E-03 |
| ENSDARG00000015404  | arl3l2            | 3     | 276     | 4,14 | 9,26E-04 |
| ENSDARG00000007383  | kcnk6             | 0     | 48      | 4,14 | 1,43E-03 |
| ENSDARG00000079198  | usp13             | 0     | 37      | 4,13 | 1,48E-03 |
| ENSDARG00000060846  | cabp7b            | 3     | 191     | 4,12 | 7,93E-04 |
| ENSDARG00000012449  | si:ch211-169p10.1 | 1     | 56      | 4,12 | 7,46E-04 |
| ENSDARG00000074591  | eda               | 4     | 172     | 4,12 | 6,34E-04 |
| ENSDARG00000008637  | mttp              | 0     | 96      | 4,12 | 6,39E-04 |
| ENSDARG00000099183  | fkbp10a           | 2     | 426     | 4,12 | 6,39E-04 |
| ENSDARG00000076182  | stat1b            | 1     | 162     | 4,11 | 1,27E-03 |
| ENSDARG00000075012  | si:ch211-12n8.3   | 3     | 125     | 4,11 | 5,42E-04 |
| ENSDARG000000059950 | plxdc2            | 0     | 34      | 4,11 | 1,76E-03 |
| ENSDARG00000099129  | phlda1            | 0     | 35      | 4,11 | 1,44E-03 |
| ENSDARG00000039974  | rai14             | 3     | 141     | 4,10 | 3,63E-04 |
| ENSDARG00000013921  | frya              | 32    | 1389    | 4,09 | 6,02E-04 |
| ENSDARG00000060711  | sv2bb             | 13    | 689     | 4,09 | 7,56E-04 |
| ENSDARG00000012397  | eya4              | 6     | 366     | 4,07 | 5,93E-04 |
| ENSDARG000000104370 | esm1              | 1     | 102     | 4,07 | 1,61E-03 |
| ENSDARG00000014792  | lrrc4bb           | 2     | 132     | 4,06 | 7,05E-04 |
| ENSDARG00000091726  | aebp1             | 51    | 4546    | 4,06 | 1,24E-03 |
| ENSDARG00000055349  | pknox2            | 3     | 277     | 4,06 | 8,47E-04 |
| ENSDARG00000009026  | ank2a             | 19    | 801     | 4,06 | 6,67E-04 |
| ENSDARG00000056619  | arhgap42a         | 3     | 148     | 4,06 | 3,73E-04 |
| ENSDARG000000091560 | slc6a19a.2        | 1     | 77      | 4,06 | 9,57E-04 |
| ENSDARG00000098024  | si:dkey-262k9.2   | 10    | 357     | 4,06 | 2,29E-04 |
| ENSDARG00000074695  | mertka            | 11    | 1121    | 4,05 | 1,35E-03 |
| ENSDARG00000016081  | cldn15la          | 0     | 32      | 4,05 | 1,24E-03 |
| ENSDARG00000006120  | tbx2b             | 36    | 1577    | 4,05 | 7,78E-04 |
| ENSDARG00000095184  | si:ch73-52p7.1    | 0     | 34      | 4,05 | 1,76E-03 |
| ENSDARG00000045528  | fgd6              | 5     | 225     | 4,04 | 5,05E-04 |
| ENSDARG0000004415   | tcf7l2            | 1     | 68      | 4,04 | 2,30E-03 |

|                     |                   |     |      |      |          |
|---------------------|-------------------|-----|------|------|----------|
| ENSDARG00000069431  | slc26a4           | 1   | 88   | 4,03 | 1,70E-03 |
| ENSDARG00000063437  | wnt9a             | 6   | 498  | 4,02 | 8,06E-04 |
| ENSDARG00000104665  | kirrel3l          | 1   | 89   | 4,02 | 2,70E-03 |
| ENSDARG00000014215  | cdh13             | 7   | 403  | 4,01 | 1,43E-03 |
| ENSDARG00000009567  | spegb             | 60  | 2911 | 4,01 | 1,44E-03 |
| ENSDARG00000071465  | lrrc39            | 10  | 224  | 4,01 | 2,21E-05 |
| ENSDARG00000099880  | sp6               | 0   | 84   | 4,00 | 1,50E-03 |
| ENSDARG000000101077 | SCTR              | 1   | 68   | 4,00 | 2,47E-03 |
| ENSDARG00000112040  | CR774179.5        | 3   | 255  | 3,99 | 6,82E-04 |
| ENSDARG00000032565  | cacng2a           | 0   | 27   | 3,99 | 9,35E-04 |
| ENSDARG00000079029  | dhx32b            | 0   | 26   | 3,98 | 1,59E-03 |
| ENSDARG00000061963  | vrtn              | 0   | 38   | 3,98 | 2,07E-03 |
| ENSDARG000000053129 | carhsp1           | 73  | 2035 | 3,98 | 1,36E-04 |
| ENSDARG00000074589  | rin2              | 1   | 136  | 3,98 | 1,48E-03 |
| ENSDARG00000070081  | rspo3             | 0   | 40   | 3,98 | 3,43E-03 |
| ENSDARG00000008019  | mxg               | 0   | 29   | 3,97 | 5,07E-03 |
| ENSDARG00000079862  | kl                | 89  | 3627 | 3,97 | 1,11E-03 |
| ENSDARG00000025254  | s100a10b          | 11  | 534  | 3,97 | 8,01E-04 |
| ENSDARG000000062341 | wfs1a             | 0   | 73   | 3,97 | 2,21E-03 |
| ENSDARG00000023963  | tpm4a             | 5   | 277  | 3,96 | 1,06E-03 |
| ENSDARG00000103286  | kcnk4a            | 1   | 47   | 3,96 | 3,11E-03 |
| ENSDARG00000059043  | ntf3              | 9   | 706  | 3,95 | 3,29E-03 |
| ENSDARG00000090064  | TMEM179 (1 of mai | 40  | 863  | 3,93 | 2,44E-05 |
| ENSDARG00000079611  | sema4c            | 13  | 512  | 3,93 | 6,05E-04 |
| ENSDARG00000011066  | glra3             | 0   | 29   | 3,92 | 2,47E-03 |
| ENSDARG00000018263  | pdia2             | 2   | 194  | 3,92 | 1,72E-03 |
| ENSDARG00000051912  | zgc:152945        | 0   | 30   | 3,92 | 5,04E-03 |
| ENSDARG00000069290  | bida              | 0   | 23   | 3,92 | 1,71E-03 |
| ENSDARG00000093686  | si:rp71-36a1.2    | 0   | 40   | 3,91 | 1,71E-03 |
| ENSDARG00000094112  | slc22a21          | 1   | 45   | 3,91 | 1,48E-03 |
| ENSDARG000000096809 | si:ch211-168b3.2  | 0   | 32   | 3,91 | 4,09E-03 |
| ENSDARG00000040944  | ntd5              | 1   | 193  | 3,89 | 1,39E-03 |
| ENSDARG00000087165  | si:dkeyp-69c1.7   | 0   | 28   | 3,89 | 2,93E-03 |
| ENSDARG00000088140  | hsd17b7           | 2   | 76   | 3,88 | 6,80E-04 |
| ENSDARG00000037677  | fgf24             | 2   | 245  | 3,88 | 2,54E-03 |
| ENSDARG00000045638  | slc13a1           | 0   | 38   | 3,87 | 9,84E-03 |
| ENSDARG000000054177 | adgra1a           | 8   | 181  | 3,87 | 8,94E-05 |
| ENSDARG00000005841  | tnni2a.2          | 2   | 98   | 3,87 | 2,42E-03 |
| ENSDARG00000014804  | cacna2d1a         | 2   | 75   | 3,86 | 4,28E-04 |
| ENSDARG00000002197  | pygl              | 2   | 146  | 3,86 | 2,28E-03 |
| ENSDARG00000022165  | mgst1.2           | 0   | 77   | 3,86 | 9,38E-04 |
| ENSDARG00000112767  | LO017951.1        | 0   | 27   | 3,85 | 1,58E-03 |
| ENSDARG000000087394 | tshz3a            | 13  | 761  | 3,84 | 2,78E-03 |
| ENSDARG00000117145  | notum1b           | 0   | 38   | 3,84 | 3,29E-03 |
| ENSDARG00000097209  | cox8b             | 16  | 457  | 3,83 | 3,47E-04 |
| ENSDARG00000012019  | glra1             | 4   | 395  | 3,83 | 2,05E-03 |
| ENSDARG00000008140  | kcnab1a           | 0   | 35   | 3,83 | 1,58E-03 |
| ENSDARG000000037917 | itga3a            | 3   | 133  | 3,83 | 1,08E-03 |
| ENSDARG00000044048  | prnpb             | 4   | 239  | 3,82 | 1,52E-03 |
| ENSDARG00000018757  | klf5l             | 2   | 59   | 3,82 | 9,90E-04 |
| ENSDARG00000101629  | CABZ01079192.1    | 51  | 1671 | 3,82 | 1,11E-03 |
| ENSDARG00000061692  | yjefn3            | 84  | 1855 | 3,82 | 1,34E-04 |
| ENSDARG00000060200  | CU019662.1        | 3   | 269  | 3,82 | 1,96E-03 |
| ENSDARG000000073935 | wnt6b             | 0   | 34   | 3,82 | 4,37E-03 |
| ENSDARG00000074508  | si:dkey-28e7.3    | 1   | 27   | 3,82 | 4,27E-03 |
| ENSDARG00000007941  | hmx4              | 3   | 487  | 3,82 | 1,11E-03 |
| ENSDARG00000076853  | areg              | 1   | 62   | 3,82 | 1,89E-03 |
| ENSDARG00000086623  | vav3a             | 1   | 63   | 3,82 | 3,28E-03 |
| ENSDARG00000008541  | chia.4            | 0   | 25   | 3,81 | 5,38E-03 |
| ENSDARG000000035715 | marcks11b         | 183 | 4679 | 3,81 | 3,63E-04 |
| ENSDARG00000023369  | mxd               | 0   | 24   | 3,81 | 4,14E-03 |
| ENSDARG00000053272  | si:dkey-166d12.2  | 11  | 257  | 3,81 | 3,08E-04 |
| ENSDARG000000059601 | map1aa            | 20  | 506  | 3,81 | 2,61E-04 |
| ENSDARG000000059442 | smtnb             | 0   | 37   | 3,80 | 3,34E-03 |
| ENSDARG00000079393  | tmprrs15          | 0   | 27   | 3,79 | 2,32E-03 |
| ENSDARG000000029497 | tfcp2l1           | 5   | 172  | 3,79 | 1,10E-03 |
| ENSDARG00000011618  | slc26a2           | 42  | 908  | 3,79 | 1,35E-04 |
| ENSDARG00000052948  | zgc:195023        | 85  | 6762 | 3,78 | 1,48E-03 |
| ENSDARG00000100446  | si:ch211-286o17.1 | 1   | 98   | 3,78 | 2,41E-03 |
| ENSDARG00000045685  | cntn1b            | 9   | 240  | 3,78 | 6,37E-04 |
| ENSDARG00000021137  | adgrv1            | 8   | 397  | 3,78 | 1,08E-03 |
| ENSDARG00000104089  | p3h4              | 22  | 1194 | 3,78 | 2,80E-03 |
| ENSDARG00000060941  | ANKFN1            | 1   | 51   | 3,78 | 4,84E-03 |

|                    |                   |    |      |      |          |
|--------------------|-------------------|----|------|------|----------|
| ENSDARG00000105324 | si:dkey-11o1.7    | 0  | 20   | 3,77 | 6,07E-03 |
| ENSDARG00000113737 | GABRA2            | 1  | 109  | 3,77 | 2,09E-03 |
| ENSDARG00000007490 | adrb1             | 2  | 141  | 3,77 | 2,56E-03 |
| ENSDARG00000023712 | mao               | 13 | 391  | 3,77 | 6,39E-04 |
| ENSDARG00000024546 | pla2g4aa          | 0  | 37   | 3,76 | 2,81E-03 |
| ENSDARG00000090499 | tmem121ab         | 0  | 23   | 3,76 | 4,43E-03 |
| ENSDARG00000092810 | stap2a            | 0  | 61   | 3,75 | 3,60E-03 |
| ENSDARG00000015506 | klf5a             | 0  | 37   | 3,74 | 3,76E-03 |
| ENSDARG00000078650 | kcna4             | 1  | 35   | 3,73 | 6,42E-03 |
| ENSDARG00000087084 | hcar1-4           | 10 | 338  | 3,73 | 1,74E-03 |
| ENSDARG00000040048 | GALNTL6           | 9  | 545  | 3,73 | 3,88E-03 |
| ENSDARG00000079293 | gdpd4b            | 2  | 69   | 3,73 | 1,14E-03 |
| ENSDARG00000079756 | peak1             | 1  | 50   | 3,72 | 4,63E-03 |
| ENSDARG00000057035 | stoml3b           | 5  | 373  | 3,72 | 4,81E-03 |
| ENSDARG00000045525 | tmcc3             | 3  | 108  | 3,72 | 1,08E-03 |
| ENSDARG00000052494 | pcdh18b           | 1  | 135  | 3,72 | 5,57E-03 |
| ENSDARG00000059348 | rxfp3.3b          | 2  | 188  | 3,71 | 4,14E-03 |
| ENSDARG00000059948 | si:dkey-121b10.7  | 1  | 73   | 3,71 | 3,93E-03 |
| ENSDARG00000101919 | foxj1a            | 1  | 39   | 3,71 | 3,19E-03 |
| ENSDARG00000059362 | cavin1b           | 8  | 296  | 3,70 | 1,83E-03 |
| ENSDARG00000014246 | jag2a             | 0  | 41   | 3,70 | 2,62E-03 |
| ENSDARG00000019516 | sp7               | 1  | 55   | 3,69 | 9,91E-03 |
| ENSDARG00000029832 | slc26a1           | 9  | 177  | 3,69 | 1,94E-04 |
| ENSDARG00000005595 | adgb              | 1  | 60   | 3,69 | 3,92E-03 |
| ENSDARG00000102138 | foxa1             | 2  | 79   | 3,68 | 1,34E-03 |
| ENSDARG00000078163 | hpse2             | 0  | 45   | 3,68 | 7,66E-03 |
| ENSDARG00000034504 | lmo1              | 22 | 657  | 3,68 | 1,11E-03 |
| ENSDARG00000078624 | arhgef9b          | 0  | 53   | 3,68 | 5,25E-03 |
| ENSDARG00000103607 | wtip              | 1  | 39   | 3,67 | 9,63E-03 |
| ENSDARG00000070735 | rnd2              | 18 | 377  | 3,67 | 4,25E-04 |
| ENSDARG00000075467 | shisa3            | 1  | 113  | 3,66 | 2,27E-03 |
| ENSDARG00000055825 | celsr3            | 28 | 802  | 3,66 | 1,20E-03 |
| ENSDARG0000007369  | tcf7l1b           | 2  | 125  | 3,66 | 2,62E-03 |
| ENSDARG00000020136 | ptges             | 0  | 43   | 3,65 | 5,86E-03 |
| ENSDARG00000020764 | slmapb            | 78 | 1897 | 3,65 | 1,11E-03 |
| ENSDARG00000057479 | hrh2b             | 3  | 144  | 3,65 | 1,19E-03 |
| ENSDARG00000078898 | pcdh7a            | 0  | 31   | 3,65 | 9,52E-03 |
| ENSDARG00000087736 | si:dkey-118k5.3   | 1  | 93   | 3,65 | 4,92E-03 |
| ENSDARG00000011434 | ptger2a           | 31 | 1443 | 3,64 | 4,72E-03 |
| ENSDARG00000101812 | zgc:114120        | 33 | 651  | 3,64 | 4,25E-04 |
| ENSDARG00000044632 | myo7ab            | 8  | 219  | 3,64 | 8,47E-04 |
| ENSDARG00000003750 | pfas              | 35 | 782  | 3,63 | 6,39E-04 |
| ENSDARG00000043864 | nptnb             | 2  | 61   | 3,63 | 3,01E-03 |
| ENSDARG00000018820 | flncb             | 1  | 44   | 3,63 | 2,60E-03 |
| ENSDARG00000069540 | si:dkey-30c15.2   | 1  | 282  | 3,63 | 3,06E-03 |
| ENSDARG00000091503 | FADS6             | 2  | 98   | 3,62 | 2,39E-03 |
| ENSDARG0000007950  | itga11b           | 17 | 381  | 3,62 | 8,47E-04 |
| ENSDARG00000015176 | ror1              | 0  | 33   | 3,62 | 7,84E-03 |
| ENSDARG00000100876 | sez6a             | 0  | 60   | 3,61 | 2,02E-03 |
| ENSDARG00000114444 | CABZ01079081.1    | 2  | 93   | 3,61 | 3,14E-03 |
| ENSDARG00000041107 | cftr              | 1  | 49   | 3,61 | 6,12E-03 |
| ENSDARG00000062672 | kcnj19b           | 69 | 1186 | 3,61 | 1,09E-04 |
| ENSDARG00000059746 | plod1a            | 20 | 416  | 3,59 | 4,52E-04 |
| ENSDARG00000042390 | syndig1l          | 1  | 100  | 3,59 | 5,78E-03 |
| ENSDARG00000056499 | ca6               | 3  | 896  | 3,59 | 1,45E-03 |
| ENSDARG00000006468 | grap2a            | 0  | 28   | 3,59 | 7,16E-03 |
| ENSDARG00000086815 | MYADM             | 3  | 72   | 3,58 | 1,27E-03 |
| ENSDARG00000099535 | si:ch73-379j16.2  | 1  | 32   | 3,58 | 1,59E-03 |
| ENSDARG00000067976 | ar                | 1  | 122  | 3,58 | 3,36E-03 |
| ENSDARG00000104868 | si:dkey-21e5.1    | 0  | 25   | 3,57 | 4,11E-03 |
| ENSDARG00000099411 | zgc:158343        | 0  | 39   | 3,57 | 9,30E-04 |
| ENSDARG00000090081 | si:dkey-1m11.5    | 0  | 29   | 3,56 | 6,08E-03 |
| ENSDARG00000077540 | f2rl1.2           | 11 | 259  | 3,55 | 1,45E-03 |
| ENSDARG00000097372 | si:ch211-139d20.3 | 1  | 49   | 3,55 | 5,16E-03 |
| ENSDARG00000039436 | il13ra2           | 0  | 42   | 3,55 | 3,62E-03 |
| ENSDARG00000035468 | slc25a25b         | 11 | 231  | 3,54 | 4,19E-04 |
| ENSDARG00000051768 | fhod1             | 10 | 164  | 3,54 | 1,35E-04 |
| ENSDARG00000101677 | chrnb4            | 4  | 162  | 3,54 | 7,43E-03 |
| ENSDARG00000039243 | zgc:152791        | 2  | 124  | 3,53 | 5,69E-03 |
| ENSDARG00000017446 | camk1db           | 2  | 71   | 3,53 | 3,89E-03 |
| ENSDARG00000078839 | si:dkey-28o19.1   | 0  | 20   | 3,53 | 9,27E-03 |
| ENSDARG00000057610 | cdkn2c            | 2  | 49   | 3,53 | 1,21E-03 |
| ENSDARG00000037879 | lfng              | 2  | 93   | 3,53 | 1,66E-03 |

|                     |                  |     |      |      |          |
|---------------------|------------------|-----|------|------|----------|
| ENSDARG00000039490  | pitpnaa          | 390 | 6528 | 3,53 | 1,76E-04 |
| ENSDARG00000004618  | stx2a            | 39  | 559  | 3,53 | 2,18E-05 |
| ENSDARG00000011407  | col2a1b          | 25  | 521  | 3,52 | 8,47E-04 |
| ENSDARG00000073824  | RASGRF1          | 1   | 30   | 3,52 | 1,45E-02 |
| ENSDARG00000099898  | si:ch211-27e6.1  | 0   | 20   | 3,51 | 7,33E-03 |
| ENSDARG00000035609  | mtnr1c           | 17  | 352  | 3,50 | 1,22E-03 |
| ENSDARG00000013174  | nkd3             | 0   | 28   | 3,50 | 3,56E-03 |
| ENSDARG000000056530 | cpamd8           | 73  | 3682 | 3,49 | 4,82E-03 |
| ENSDARG00000053380  | fam189a1         | 1   | 128  | 3,49 | 4,80E-03 |
| ENSDARG00000014927  | uts1             | 14  | 925  | 3,49 | 4,26E-03 |
| ENSDARG00000012860  | tmprss4b         | 2   | 37   | 3,49 | 1,45E-03 |
| ENSDARG00000014910  | panx1b           | 3   | 62   | 3,49 | 3,08E-04 |
| ENSDARG000000095048 | si:dkey-250k15.7 | 20  | 483  | 3,48 | 3,70E-03 |
| ENSDARG000000063713 | syngap1a         | 2   | 84   | 3,48 | 4,86E-03 |
| ENSDARG00000025667  | adgrb2           | 1   | 50   | 3,48 | 1,83E-03 |
| ENSDARG00000022895  | mcf2a            | 28  | 738  | 3,48 | 3,29E-03 |
| ENSDARG00000070617  | vhl              | 41  | 625  | 3,48 | 1,13E-04 |
| ENSDARG000000005141 | camkvb           | 24  | 852  | 3,48 | 4,47E-03 |
| ENSDARG000000077643 | lypd6b           | 3   | 108  | 3,48 | 3,92E-03 |
| ENSDARG00000001234  | map4k2           | 1   | 35   | 3,48 | 5,84E-03 |
| ENSDARG00000070618  | tatdn2           | 6   | 140  | 3,47 | 2,76E-03 |
| ENSDARG000000037267 | zgc:158263       | 6   | 141  | 3,47 | 1,42E-03 |
| ENSDARG000000098573 | sgcd             | 11  | 580  | 3,47 | 7,67E-03 |
| ENSDARG00000003615  | slc26a3.2        | 427 | 6565 | 3,46 | 1,94E-04 |
| ENSDARG000000109686 | si:ch211-59p23.1 | 0   | 25   | 3,46 | 7,58E-03 |
| ENSDARG00000116353  | CABZ01071171.1   | 1   | 46   | 3,46 | 1,01E-02 |
| ENSDARG00000074307  | rapgef5b         | 0   | 25   | 3,45 | 6,28E-03 |
| ENSDARG000000101980 | bmp6r            | 3   | 82   | 3,45 | 2,73E-03 |
| ENSDARG00000076500  | chgb             | 18  | 320  | 3,45 | 7,07E-04 |
| ENSDARG00000001968  | dock5            | 2   | 55   | 3,44 | 3,50E-03 |
| ENSDARG000000103736 | gramd2aa         | 1   | 37   | 3,44 | 5,02E-03 |
| ENSDARG00000031712  | grm3             | 4   | 165  | 3,44 | 7,05E-03 |
| ENSDARG00000010862  | amt              | 12  | 213  | 3,44 | 8,82E-04 |
| ENSDARG000000060837 | trpc5b           | 17  | 636  | 3,43 | 1,05E-02 |
| ENSDARG00000090063  | fa2h             | 11  | 259  | 3,42 | 3,29E-03 |
| ENSDARG00000007823  | atf3             | 44  | 722  | 3,42 | 3,49E-04 |
| ENSDARG000000062129 | mxra8b           | 1   | 40   | 3,42 | 9,77E-03 |
| ENSDARG00000007723  | efnb1            | 5   | 97   | 3,41 | 2,00E-03 |
| ENSDARG00000032435  | itga9            | 2   | 45   | 3,41 | 2,16E-03 |
| ENSDARG00000027957  | fgf12a           | 8   | 285  | 3,40 | 7,66E-03 |
| ENSDARG00000010565  | aqp4             | 133 | 4867 | 3,40 | 8,02E-03 |
| ENSDARG00000017354  | epha2a           | 0   | 78   | 3,40 | 3,54E-03 |
| ENSDARG000000020250 | rhoj             | 0   | 25   | 3,40 | 1,06E-02 |
| ENSDARG000000088202 | sh3d19           | 8   | 146  | 3,39 | 1,02E-03 |
| ENSDARG000000101495 | ugt5b3           | 2   | 43   | 3,39 | 3,58E-03 |
| ENSDARG00000014273  | camk2d2          | 2   | 62   | 3,39 | 4,87E-03 |
| ENSDARG00000063230  | bmp7b            | 9   | 480  | 3,39 | 9,07E-03 |
| ENSDARG000000053301 | insm1b           | 19  | 354  | 3,39 | 8,15E-04 |
| ENSDARG00000069143  | map3k7cl         | 3   | 76   | 3,37 | 4,88E-03 |
| ENSDARG00000102995  | rbm24a           | 5   | 397  | 3,37 | 3,11E-03 |
| ENSDARG00000016837  | glipr2l          | 1   | 42   | 3,37 | 3,89E-03 |
| ENSDARG00000103950  | pcdh1gc6         | 16  | 240  | 3,36 | 5,14E-04 |
| ENSDARG00000036292  | cdx4             | 11  | 274  | 3,36 | 5,52E-03 |
| ENSDARG000000069954 | kcnq5a           | 0   | 22   | 3,36 | 1,75E-02 |
| ENSDARG00000075277  | si:dkeyp-14d3.1  | 1   | 60   | 3,36 | 6,82E-03 |
| ENSDARG00000097889  | si:ch73-265h17.2 | 2   | 52   | 3,36 | 5,71E-03 |
| ENSDARG00000071879  | tgfb2l           | 2   | 69   | 3,36 | 1,06E-02 |
| ENSDARG00000044010  | lox12a           | 21  | 793  | 3,36 | 5,81E-03 |
| ENSDARG00000055229  | ncs1a            | 1   | 45   | 3,36 | 1,75E-02 |
| ENSDARG000000090202 | rbm11            | 0   | 59   | 3,35 | 6,63E-03 |
| ENSDARG000000088251 | si:ch211-24o10.6 | 11  | 240  | 3,35 | 3,01E-03 |
| ENSDARG00000020292  | si:ch211-254n4.3 | 2   | 174  | 3,34 | 6,28E-03 |
| ENSDARG00000073802  | cntnap5l         | 3   | 208  | 3,34 | 8,99E-03 |
| ENSDARG00000100731  | CU372926.1       | 1   | 25   | 3,33 | 7,85E-03 |
| ENSDARG00000071107  | wnt7bb           | 19  | 399  | 3,33 | 2,91E-03 |
| ENSDARG00000074760  | ttc7a            | 15  | 284  | 3,33 | 3,76E-03 |
| ENSDARG00000077470  | si:dkey-193b15.8 | 0   | 25   | 3,33 | 1,22E-02 |
| ENSDARG00000037363  | st5              | 28  | 484  | 3,32 | 2,39E-03 |
| ENSDARG00000006308  | ptpn18           | 1   | 28   | 3,32 | 9,89E-03 |
| ENSDARG00000104847  | ptger1b          | 4   | 365  | 3,32 | 1,06E-02 |
| ENSDARG00000060753  | pear1            | 4   | 336  | 3,31 | 7,47E-03 |
| ENSDARG000000042112 | dio1             | 2   | 38   | 3,30 | 4,14E-03 |
| ENSDARG00000015025  | l1camb           | 6   | 139  | 3,30 | 6,75E-03 |

|                     |                   |     |      |      |          |
|---------------------|-------------------|-----|------|------|----------|
| ENSDARG00000006775  | cass4             | 1   | 21   | 3,29 | 1,64E-02 |
| ENSDARG000000060884 | nmur1a            | 1   | 51   | 3,29 | 1,38E-02 |
| ENSDARG00000101577  | si:ch211-172l8.4  | 0   | 25   | 3,28 | 1,37E-02 |
| ENSDARG00000077722  | ppp2r3a           | 1   | 61   | 3,28 | 9,91E-03 |
| ENSDARG00000076981  | zgc:198329        | 1   | 29   | 3,28 | 1,05E-02 |
| ENSDARG00000074908  | col6a1            | 0   | 33   | 3,28 | 1,63E-02 |
| ENSDARG00000089368  | hopx              | 267 | 3164 | 3,28 | 4,72E-05 |
| ENSDARG000000013837 | spo11             | 2   | 54   | 3,27 | 1,15E-02 |
| ENSDARG00000002634  | b4galt1           | 0   | 29   | 3,27 | 7,71E-03 |
| ENSDARG00000076690  | avpr2l            | 4   | 418  | 3,26 | 1,10E-02 |
| ENSDARG000000027419 | gad1b             | 1   | 23   | 3,26 | 1,66E-02 |
| ENSDARG00000014626  | dlx3b             | 2   | 42   | 3,26 | 1,53E-02 |
| ENSDARG000000059707 | ZNF423            | 4   | 72   | 3,26 | 2,02E-03 |
| ENSDARG00000031783  | adcy8             | 4   | 77   | 3,26 | 5,58E-03 |
| ENSDARG00000060152  | fam155b           | 0   | 34   | 3,26 | 5,81E-03 |
| ENSDARG00000099236  | sept-10           | 9   | 161  | 3,25 | 2,81E-03 |
| ENSDARG00000031095  | veph1             | 0   | 26   | 3,25 | 1,86E-02 |
| ENSDARG00000088878  | c1qtnf1           | 3   | 89   | 3,25 | 7,07E-03 |
| ENSDARG000000016981 | bcar3             | 4   | 139  | 3,25 | 8,66E-03 |
| ENSDARG00000042548  | tpd52l1           | 18  | 329  | 3,25 | 4,41E-03 |
| ENSDARG00000078177  | cxcr3.1           | 3   | 54   | 3,25 | 8,16E-03 |
| ENSDARG000000055283 | id2a              | 14  | 194  | 3,24 | 6,58E-04 |
| ENSDARG00000080009  | bahcc1b           | 4   | 192  | 3,24 | 1,03E-02 |
| ENSDARG00000005800  | ampd3a            | 8   | 157  | 3,24 | 8,03E-03 |
| ENSDARG000000063634 | hpse              | 7   | 102  | 3,24 | 1,43E-03 |
| ENSDARG00000004635  | epha7             | 31  | 658  | 3,24 | 8,93E-03 |
| ENSDARG00000043646  | slc6a8            | 0   | 71   | 3,24 | 2,23E-03 |
| ENSDARG000000010083 | rbfox3a           | 3   | 61   | 3,24 | 2,63E-03 |
| ENSDARG00000009544  | cldnb             | 1   | 118  | 3,23 | 3,22E-03 |
| ENSDARG00000039181  | trpm3             | 28  | 566  | 3,23 | 8,57E-03 |
| ENSDARG000000063224 | nxph2a            | 0   | 21   | 3,23 | 3,33E-02 |
| ENSDARG00000075189  | cntnap5b          | 1   | 102  | 3,23 | 5,87E-03 |
| ENSDARG00000045443  | agtr1b            | 26  | 993  | 3,22 | 1,72E-02 |
| ENSDARG000000061047 | abcg4a            | 4   | 159  | 3,22 | 1,94E-02 |
| ENSDARG00000098769  | slitrk6           | 2   | 185  | 3,21 | 8,68E-03 |
| ENSDARG00000053475  | ngb               | 0   | 26   | 3,21 | 2,18E-02 |
| ENSDARG000000052898 | kcnk3b            | 250 | 3370 | 3,21 | 9,79E-04 |
| ENSDARG00000091459  | gabra2a           | 1   | 164  | 3,21 | 3,87E-03 |
| ENSDARG00000045749  | ppfibp1a          | 52  | 731  | 3,21 | 1,21E-03 |
| ENSDARG00000099387  | jpt1a             | 3   | 58   | 3,21 | 5,08E-03 |
| ENSDARG00000053179  | cttnbp2nla        | 1   | 56   | 3,21 | 1,10E-02 |
| ENSDARG00000098420  | SNTA1             | 11  | 382  | 3,21 | 1,48E-02 |
| ENSDARG000000017676 | mmp2              | 3   | 274  | 3,20 | 7,66E-03 |
| ENSDARG00000010420  | ndrg1b            | 2   | 62   | 3,20 | 7,71E-03 |
| ENSDARG00000098899  | zmp:0000001082    | 15  | 587  | 3,20 | 1,44E-02 |
| ENSDARG00000054683  | prdm8b            | 3   | 42   | 3,19 | 3,87E-03 |
| ENSDARG00000030867  | opn7c             | 2   | 118  | 3,19 | 5,08E-03 |
| ENSDARG000000040526 | s1pr5a            | 0   | 85   | 3,19 | 3,06E-03 |
| ENSDARG00000104569  | CABZ01088484.1    | 28  | 791  | 3,19 | 1,31E-02 |
| ENSDARG00000068100  | fam19a5l          | 4   | 73   | 3,18 | 7,75E-03 |
| ENSDARG00000045544  | hgfa              | 0   | 24   | 3,18 | 1,65E-02 |
| ENSDARG00000020031  | cldn11a           | 30  | 439  | 3,18 | 2,07E-03 |
| ENSDARG00000100847  | esrrb             | 2   | 38   | 3,17 | 9,91E-03 |
| ENSDARG000000042840 | eml1              | 3   | 105  | 3,17 | 1,05E-02 |
| ENSDARG00000027360  | si:ch211-106h11.3 | 0   | 22   | 3,16 | 1,94E-02 |
| ENSDARG00000071091  | chrn3a            | 5   | 249  | 3,16 | 1,54E-02 |
| ENSDARG00000077677  | pdgfd             | 4   | 99   | 3,16 | 2,18E-02 |
| ENSDARG00000105190  | rhbdl3            | 1   | 106  | 3,15 | 7,78E-03 |
| ENSDARG00000104213  | si:dkey-283b1.6   | 4   | 61   | 3,15 | 2,64E-03 |
| ENSDARG000000062156 | abi3bpa           | 1   | 37   | 3,15 | 2,53E-02 |
| ENSDARG00000091111  | si:ch211-15b10.6  | 8   | 140  | 3,14 | 5,36E-03 |
| ENSDARG00000089529  | desi1b            | 3   | 38   | 3,14 | 1,27E-03 |
| ENSDARG00000115189  | LO017791.1        | 22  | 840  | 3,14 | 1,91E-02 |
| ENSDARG00000060298  | nin               | 53  | 617  | 3,14 | 3,90E-04 |
| ENSDARG00000044485  | sall4             | 37  | 719  | 3,14 | 5,52E-03 |
| ENSDARG000000034080 | plcd1b            | 3   | 58   | 3,14 | 8,33E-03 |
| ENSDARG00000087616  | maptb             | 66  | 700  | 3,13 | 5,41E-05 |
| ENSDARG00000096567  | si:ch211-155o21.4 | 2   | 72   | 3,13 | 9,14E-03 |
| ENSDARG00000033735  | ncf1              | 14  | 289  | 3,13 | 5,76E-03 |
| ENSDARG00000103591  | dkk3a             | 0   | 54   | 3,13 | 1,12E-02 |
| ENSDARG00000032820  | rxfp2a            | 41  | 482  | 3,13 | 4,19E-04 |
| ENSDARG000000023053 | fam129ab          | 1   | 38   | 3,13 | 1,09E-02 |
| ENSDARG00000097869  | si:dkey-1m11.6    | 0   | 31   | 3,13 | 1,02E-02 |

|                     |                    |     |      |      |          |
|---------------------|--------------------|-----|------|------|----------|
| ENSDARG0000008885   | si:ch1073-340i21.3 | 0   | 22   | 3,12 | 2,33E-02 |
| ENSDARG00000089441  | si:ch211-105c13.3  | 1   | 37   | 3,12 | 2,80E-02 |
| ENSDARG00000036065  | mgat1b             | 9   | 110  | 3,12 | 3,33E-04 |
| ENSDARG00000045747  | cped1              | 1   | 88   | 3,12 | 1,02E-02 |
| ENSDARG00000061051  | brinp3a.2          | 0   | 26   | 3,11 | 1,05E-02 |
| ENSDARG00000077740  | b3glctb            | 1   | 30   | 3,11 | 1,90E-02 |
| ENSDARG00000067958  | sh3gl1a            | 4   | 63   | 3,11 | 3,32E-03 |
| ENSDARG00000052997  | sema4e             | 1   | 25   | 3,11 | 7,31E-03 |
| ENSDARG00000090963  | atp6ap1lb          | 8   | 211  | 3,11 | 1,48E-02 |
| ENSDARG00000103333  | baiap2b            | 4   | 64   | 3,11 | 2,19E-03 |
| ENSDARG00000098057  | dscaml1            | 25  | 452  | 3,10 | 1,45E-02 |
| ENSDARG00000071331  | ryr3               | 60  | 780  | 3,10 | 1,99E-03 |
| ENSDARG00000076856  | frem2a             | 11  | 261  | 3,10 | 8,01E-03 |
| ENSDARG00000097285  | si:ch211-147g22.5  | 1   | 25   | 3,10 | 1,63E-02 |
| ENSDARG00000093279  | si:dkey-11o1.3     | 4   | 59   | 3,09 | 1,16E-02 |
| ENSDARG00000076685  | wisp1b             | 0   | 25   | 3,08 | 1,27E-02 |
| ENSDARG00000079876  | CU855878.1         | 16  | 222  | 3,08 | 1,85E-03 |
| ENSDARG00000004445  | grm5a              | 1   | 79   | 3,08 | 1,44E-02 |
| ENSDARG00000070491  | hpcal4             | 19  | 243  | 3,08 | 1,84E-03 |
| ENSDARG00000100055  | tox2               | 21  | 292  | 3,07 | 2,98E-03 |
| ENSDARG00000018653  | acot7              | 19  | 236  | 3,07 | 1,48E-03 |
| ENSDARG00000021633  | sh3bgr             | 3   | 49   | 3,07 | 5,33E-03 |
| ENSDARG00000059347  | calml4b            | 0   | 25   | 3,07 | 1,32E-02 |
| ENSDARG00000068557  | htr5ab             | 11  | 164  | 3,06 | 8,93E-03 |
| ENSDARG00000100342  | zgc:158464         | 1   | 22   | 3,06 | 9,91E-03 |
| ENSDARG0000004932   | anos1b             | 2   | 64   | 3,06 | 1,00E-02 |
| ENSDARG00000046053  | slc27a6            | 1   | 21   | 3,06 | 2,35E-02 |
| ENSDARG00000090338  | fam20cb            | 13  | 175  | 3,05 | 3,39E-03 |
| ENSDARG00000006604  | nectin3b           | 6   | 105  | 3,05 | 8,99E-03 |
| ENSDARG00000015890  | mafa               | 0   | 27   | 3,05 | 5,47E-03 |
| ENSDARG000000069669 | adra2c             | 0   | 30   | 3,05 | 1,80E-02 |
| ENSDARG00000010183  | si:ch73-265h17.1   | 7   | 94   | 3,04 | 6,30E-03 |
| ENSDARG00000087446  | mmd2a              | 7   | 88   | 3,04 | 3,16E-03 |
| ENSDARG00000116804  | CABZ01037174.1     | 7   | 225  | 3,04 | 2,43E-02 |
| ENSDARG00000052157  | il12rb2            | 4   | 56   | 3,04 | 5,74E-03 |
| ENSDARG00000104125  | ttc6               | 17  | 316  | 3,04 | 1,48E-02 |
| ENSDARG00000038010  | rac2               | 2   | 34   | 3,03 | 6,07E-03 |
| ENSDARG00000015955  | cldnc              | 0   | 89   | 3,03 | 2,60E-03 |
| ENSDARG00000058821  | sema5a             | 6   | 106  | 3,02 | 1,05E-02 |
| ENSDARG00000055238  | kif17              | 1   | 24   | 3,02 | 1,71E-02 |
| ENSDARG00000060008  | hhipl2             | 6   | 71   | 3,01 | 3,66E-03 |
| ENSDARG00000006396  | nrcama             | 196 | 2247 | 3,01 | 1,69E-03 |
| ENSDARG00000016494  | ddc                | 6   | 140  | 3,01 | 2,02E-02 |
| ENSDARG00000010132  | dacha              | 1   | 32   | 3,01 | 1,60E-02 |
| ENSDARG00000056653  | fhl1b              | 24  | 438  | 3,01 | 1,59E-02 |
| ENSDARG00000044441  | si:ch73-194h10.2   | 1   | 26   | 3,01 | 1,41E-02 |
| ENSDARG00000078185  | pacs2              | 2   | 124  | 3,00 | 1,18E-02 |
| ENSDARG00000010727  | ttyh2l             | 4   | 64   | 3,00 | 7,65E-03 |
| ENSDARG00000088842  | KCNB2              | 0   | 53   | 2,99 | 5,92E-03 |
| ENSDARG00000074223  | MDFIC              | 3   | 149  | 2,99 | 2,90E-02 |
| ENSDARG00000061231  | tinagl1            | 0   | 76   | 2,99 | 3,72E-03 |
| ENSDARG00000000857  | mapk14a            | 329 | 3062 | 2,99 | 6,58E-05 |
| ENSDARG00000087709  | FAT3 (1 of many)   | 3   | 288  | 2,99 | 9,00E-03 |
| ENSDARG000000009624 | UTS2R              | 0   | 122  | 2,99 | 5,78E-03 |
| ENSDARG00000044694  | fybb               | 1   | 39   | 2,98 | 1,46E-02 |
| ENSDARG00000034453  | unc119a            | 1   | 32   | 2,98 | 1,81E-02 |
| ENSDARG00000106669  | CABZ01068358.1     | 7   | 85   | 2,98 | 1,60E-03 |
| ENSDARG00000024278  | adh8b              | 25  | 289  | 2,97 | 2,52E-03 |
| ENSDARG00000040430  | nptxra             | 2   | 114  | 2,97 | 2,12E-02 |
| ENSDARG000000074126 | ttc39a             | 10  | 169  | 2,97 | 1,39E-02 |
| ENSDARG00000077590  | arsj               | 0   | 26   | 2,97 | 4,88E-02 |
| ENSDARG00000076564  | hspg2              | 33  | 467  | 2,97 | 5,86E-03 |
| ENSDARG00000039220  | st6galnac5a        | 22  | 467  | 2,96 | 2,83E-02 |
| ENSDARG00000029905  | phyhd1             | 5   | 77   | 2,96 | 1,54E-02 |
| ENSDARG00000106606  | CT027674.1         | 1   | 21   | 2,96 | 3,31E-02 |
| ENSDARG00000102805  | cyp2aa11           | 0   | 20   | 2,96 | 2,52E-02 |
| ENSDARG00000045483  | lrrtm2a            | 5   | 75   | 2,95 | 6,15E-03 |
| ENSDARG00000103712  | plpp7              | 10  | 105  | 2,95 | 4,76E-04 |
| ENSDARG00000073728  | gal3st3            | 5   | 110  | 2,94 | 1,72E-02 |
| ENSDARG00000115359  | CABZ01077555.1     | 6   | 73   | 2,93 | 2,68E-03 |
| ENSDARG00000036848  | slc43a2a           | 734 | 7931 | 2,92 | 1,96E-03 |
| ENSDARG000000025478 | gipr               | 0   | 195  | 2,92 | 9,80E-03 |
| ENSDARG00000113411  | lrrc4c             | 1   | 32   | 2,91 | 2,63E-02 |

|                     |                   |     |      |      |          |
|---------------------|-------------------|-----|------|------|----------|
| ENSDARG00000051899  | exoc3l1           | 2   | 37   | 2,91 | 1,22E-02 |
| ENSDARG00000013749  | slc25a55b         | 1   | 22   | 2,91 | 2,14E-02 |
| ENSDARG00000094747  | si:ch211-197g15.6 | 2   | 60   | 2,91 | 2,56E-02 |
| ENSDARG00000052376  | b3gnt2a           | 0   | 26   | 2,91 | 1,16E-02 |
| ENSDARG00000007412  | slc2a1b           | 1   | 20   | 2,91 | 2,44E-02 |
| ENSDARG00000104139  | atp1a3b           | 3   | 121  | 2,90 | 5,16E-03 |
| ENSDARG00000013926  | slc16a9a          | 2   | 42   | 2,90 | 6,74E-03 |
| ENSDARG000000037455 | ugt8              | 83  | 786  | 2,90 | 5,61E-04 |
| ENSDARG00000044142  | acss1             | 5   | 57   | 2,90 | 6,53E-03 |
| ENSDARG00000043716  | cldn5a            | 1   | 30   | 2,89 | 2,28E-02 |
| ENSDARG00000041609  | adarb1a           | 26  | 265  | 2,89 | 1,55E-03 |
| ENSDARG00000006602  | chrna2a           | 2   | 36   | 2,89 | 2,06E-02 |
| ENSDARG000000094836 | si:ch211-195b15.8 | 292 | 2628 | 2,89 | 2,29E-04 |
| ENSDARG00000091821  | smc6              | 2   | 40   | 2,88 | 2,04E-02 |
| ENSDARG00000070487  | zgc:110783        | 93  | 929  | 2,88 | 1,54E-03 |
| ENSDARG00000069356  | adgrl2a           | 2   | 38   | 2,88 | 3,01E-02 |
| ENSDARG00000114920  | TTC28             | 4   | 71   | 2,88 | 1,11E-02 |
| ENSDARG00000074680  | rims1a            | 13  | 215  | 2,87 | 1,77E-02 |
| ENSDARG00000103026  | p3h2              | 2   | 33   | 2,87 | 1,80E-02 |
| ENSDARG00000076236  | lrrc18b           | 18  | 228  | 2,86 | 1,89E-02 |
| ENSDARG00000021948  | tnc               | 156 | 1579 | 2,86 | 2,05E-03 |
| ENSDARG00000098129  | si:dkeyp-97a10.2  | 8   | 93   | 2,86 | 6,82E-03 |
| ENSDARG00000017329  | cdkl1             | 16  | 199  | 2,86 | 7,18E-03 |
| ENSDARG00000052652  | fermt1            | 1   | 20   | 2,86 | 3,38E-02 |
| ENSDARG000000078671 | cdk5r2b           | 81  | 721  | 2,86 | 4,19E-04 |
| ENSDARG00000016598  | ckmt1             | 8   | 104  | 2,86 | 6,95E-03 |
| ENSDARG00000041998  | zgc:113337        | 1   | 41   | 2,86 | 4,31E-02 |
| ENSDARG00000010407  | ppp4r4            | 13  | 146  | 2,85 | 4,81E-03 |
| ENSDARG00000034268  | slit3             | 11  | 152  | 2,84 | 1,71E-02 |
| ENSDARG00000075557  | apcdd1l           | 19  | 388  | 2,84 | 3,97E-02 |
| ENSDARG000000002084 | lamb2             | 151 | 1665 | 2,84 | 7,65E-03 |
| ENSDARG00000057107  | si:ch73-383g2.1   | 1   | 31   | 2,83 | 1,76E-02 |
| ENSDARG00000016011  | gpcpd1            | 119 | 1105 | 2,83 | 1,42E-03 |
| ENSDARG00000070100  | si:ch211-168d1.3  | 9   | 129  | 2,83 | 1,47E-02 |
| ENSDARG00000101368  | cngb3.2           | 1   | 29   | 2,83 | 3,72E-02 |
| ENSDARG00000103311  | FBLN1             | 4   | 149  | 2,83 | 1,72E-02 |
| ENSDARG000000070857 | si:dkey-32e6.6    | 1   | 35   | 2,82 | 3,33E-02 |
| ENSDARG00000056101  | kcnd3             | 42  | 563  | 2,82 | 1,24E-02 |
| ENSDARG00000061177  | mov10b.1          | 11  | 141  | 2,82 | 1,05E-02 |
| ENSDARG00000059226  | zbtb8a            | 3   | 30   | 2,82 | 3,00E-03 |
| ENSDARG00000042725  | cebpb             | 35  | 509  | 2,81 | 7,48E-03 |
| ENSDARG00000076870  | piezo1            | 5   | 86   | 2,80 | 1,83E-02 |
| ENSDARG000000061682 | bicc1a            | 7   | 91   | 2,80 | 1,18E-02 |
| ENSDARG00000005112  | cdh17             | 5   | 116  | 2,80 | 2,27E-02 |
| ENSDARG00000013072  | mmp15b            | 15  | 322  | 2,80 | 4,11E-02 |
| ENSDARG00000060639  | apba2b            | 34  | 297  | 2,79 | 8,15E-04 |
| ENSDARG00000052336  | ociad2            | 6   | 64   | 2,79 | 3,07E-03 |
| ENSDARG000000062797 | nell2b            | 13  | 122  | 2,79 | 7,46E-04 |
| ENSDARG00000007788  | atp2b1b           | 52  | 486  | 2,79 | 1,78E-03 |
| ENSDARG00000090537  | ifit11            | 8   | 120  | 2,79 | 1,57E-02 |
| ENSDARG00000033466  | tagln2            | 11  | 182  | 2,79 | 2,65E-02 |
| ENSDARG00000025859  | lmf2b             | 18  | 159  | 2,79 | 7,94E-04 |
| ENSDARG00000034307  | chrne             | 4   | 63   | 2,78 | 2,45E-02 |
| ENSDARG000000043531 | jun               | 485 | 4194 | 2,78 | 6,53E-04 |
| ENSDARG00000076030  | cacnb3b           | 3   | 40   | 2,77 | 2,45E-02 |
| ENSDARG00000054619  | fras1             | 2   | 32   | 2,77 | 1,99E-02 |
| ENSDARG00000069262  | erich3            | 9   | 75   | 2,76 | 6,73E-04 |
| ENSDARG00000002787  | tle3a             | 37  | 303  | 2,76 | 3,52E-04 |
| ENSDARG00000031136  | moxd1             | 0   | 22   | 2,76 | 3,33E-02 |
| ENSDARG000000062707 | plat              | 2   | 32   | 2,76 | 1,49E-02 |
| ENSDARG00000008200  | ugp2b             | 448 | 3460 | 2,76 | 9,50E-05 |
| ENSDARG00000074201  | flna              | 76  | 896  | 2,75 | 1,14E-02 |
| ENSDARG00000013784  | zgc:77158         | 320 | 2490 | 2,75 | 1,36E-04 |
| ENSDARG00000110496  | zgc:162989        | 13  | 107  | 2,75 | 8,47E-04 |
| ENSDARG00000088828  | paqr8             | 0   | 22   | 2,75 | 2,06E-02 |
| ENSDARG000000023724 | cdc42se1          | 175 | 1369 | 2,74 | 2,29E-04 |
| ENSDARG00000080018  | kif16bb           | 4   | 40   | 2,74 | 6,40E-03 |
| ENSDARG00000013613  | anxa13l           | 34  | 314  | 2,73 | 2,73E-03 |
| ENSDARG00000044718  | vav2              | 5   | 60   | 2,73 | 1,62E-02 |
| ENSDARG00000100886  | si:dkeyp-97a10.1  | 12  | 132  | 2,73 | 9,17E-03 |
| ENSDARG00000087131  | ifnlr1            | 1   | 24   | 2,73 | 3,70E-02 |
| ENSDARG00000036846  | anks4b            | 2   | 24   | 2,72 | 1,81E-02 |
| ENSDARG00000015557  | zgc:100829        | 1   | 20   | 2,72 | 2,51E-02 |

|                     |                    |       |        |      |          |
|---------------------|--------------------|-------|--------|------|----------|
| ENSDARG00000036427  | slc3a2a            | 958   | 7025   | 2,72 | 3,26E-05 |
| ENSDARG00000036816  | pou2f2a            | 16    | 160    | 2,71 | 6,63E-03 |
| ENSDARG00000056184  | dvl2               | 2     | 25     | 2,71 | 2,44E-02 |
| ENSDARG00000078618  | inpp5kb            | 13    | 224    | 2,71 | 3,24E-02 |
| ENSDARG00000067984  | gas1b              | 9     | 98     | 2,71 | 1,23E-02 |
| ENSDARG00000029689  | tkta               | 5     | 73     | 2,70 | 2,16E-02 |
| ENSDARG00000039900  | si:ch73-168d20.1   | 0     | 25     | 2,70 | 7,37E-03 |
| ENSDARG00000012555  | ak5                | 54    | 700    | 2,70 | 2,02E-02 |
| ENSDARG00000003421  | igf2bp2a           | 5     | 55     | 2,70 | 8,93E-03 |
| ENSDARG00000099758  | igf2bp2b           | 3     | 27     | 2,70 | 6,60E-03 |
| ENSDARG00000075126  | TMEM8B             | 38    | 303    | 2,70 | 7,78E-04 |
| ENSDARG00000078754  | gra                | 1     | 24     | 2,69 | 3,36E-02 |
| ENSDARG00000036942  | gpd1c              | 2     | 38     | 2,69 | 1,83E-02 |
| ENSDARG00000101363  | ano2               | 16    | 215    | 2,68 | 3,66E-02 |
| ENSDARG00000027222  | adgrg1             | 2     | 28     | 2,68 | 1,90E-02 |
| ENSDARG00000039352  | pald1b             | 5     | 61     | 2,68 | 3,44E-02 |
| ENSDARG00000013711  | zgc:77486          | 2     | 26     | 2,68 | 3,57E-02 |
| ENSDARG00000045442  | cpb1               | 35    | 342    | 2,67 | 6,34E-03 |
| ENSDARG00000076001  | pip5k1ca           | 4     | 38     | 2,67 | 9,32E-03 |
| ENSDARG00000017121  | mafba              | 3     | 53     | 2,67 | 2,90E-02 |
| ENSDARG00000062346  | cacna1ea           | 18    | 159    | 2,66 | 1,72E-03 |
| ENSDARG00000056909  | LO018309.1         | 308   | 2848   | 2,66 | 1,44E-02 |
| ENSDARG00000001733  | gulp1a             | 0     | 23     | 2,66 | 2,64E-02 |
| ENSDARG00000036105  | si:dkeyp-92c9.2    | 9     | 97     | 2,65 | 1,37E-02 |
| ENSDARG000000057706 | si:ch211-137i24.10 | 4     | 144    | 2,65 | 9,96E-03 |
| ENSDARG00000009553  | gng3               | 43    | 414    | 2,64 | 1,29E-02 |
| ENSDARG00000078094  | lmf2a              | 50    | 415    | 2,63 | 4,88E-03 |
| ENSDARG00000094557  | nupr1              | 22    | 281    | 2,63 | 1,10E-02 |
| ENSDARG00000100582  | si:ch211-195b11.3  | 1     | 19     | 2,63 | 2,60E-02 |
| ENSDARG00000056438  | her9               | 0     | 23     | 2,63 | 1,28E-02 |
| ENSDARG000000044254 | anxa3b             | 4     | 42     | 2,63 | 1,73E-02 |
| ENSDARG00000104497  | pcdh1g29           | 27    | 241    | 2,63 | 7,08E-03 |
| ENSDARG00000036985  | plxnb2b            | 36    | 298    | 2,63 | 5,57E-03 |
| ENSDARG00000007869  | ehd3               | 49    | 374    | 2,62 | 1,42E-03 |
| ENSDARG00000099003  | cyp2aa1            | 7     | 89     | 2,62 | 2,49E-02 |
| ENSDARG00000087981  | slc6a11b           | 99    | 1249   | 2,62 | 3,97E-02 |
| ENSDARG00000030006  | zgc:158225         | 3     | 33     | 2,62 | 1,94E-02 |
| ENSDARG00000077383  | anxa11a            | 731   | 5148   | 2,62 | 2,29E-04 |
| ENSDARG00000089645  | si:ch1073-406l10.2 | 7     | 59     | 2,61 | 3,70E-03 |
| ENSDARG00000007371  | slc26a3.1          | 4     | 46     | 2,61 | 2,76E-02 |
| ENSDARG00000033161  | sst1.2             | 57613 | 533132 | 2,61 | 1,39E-02 |
| ENSDARG00000062289  | edaradd            | 9     | 78     | 2,61 | 9,64E-03 |
| ENSDARG00000101457  | cdc42ep4a          | 74    | 583    | 2,61 | 3,19E-03 |
| ENSDARG00000087704  | gfra3              | 13    | 141    | 2,60 | 1,57E-02 |
| ENSDARG00000103687  | syncn.2            | 0     | 50     | 2,60 | 1,38E-02 |
| ENSDARG00000055226  | slc7a7             | 922   | 6614   | 2,59 | 7,94E-04 |
| ENSDARG00000010601  | mtmr10             | 1     | 26     | 2,59 | 4,66E-02 |
| ENSDARG000000045549 | bik                | 6     | 46     | 2,59 | 2,02E-03 |
| ENSDARG00000022045  | map1ab             | 476   | 3302   | 2,59 | 3,63E-04 |
| ENSDARG00000062350  | synm               | 5     | 69     | 2,59 | 3,43E-02 |
| ENSDARG00000100722  | si:ch211-160f23.7  | 41    | 354    | 2,58 | 8,39E-03 |
| ENSDARG00000078317  | si:dkey-175m17.7   | 3     | 29     | 2,58 | 2,90E-02 |
| ENSDARG00000005989  | rgl1               | 39    | 310    | 2,58 | 4,57E-03 |
| ENSDARG000000008329 | asic1a             | 1     | 25     | 2,57 | 3,47E-02 |
| ENSDARG00000074056  | kctd1              | 0     | 51     | 2,57 | 1,27E-02 |
| ENSDARG00000101171  | FO704786.1         | 6     | 64     | 2,57 | 2,53E-02 |
| ENSDARG00000099677  | bambib             | 86    | 587    | 2,57 | 3,22E-04 |
| ENSDARG00000040907  | gcgb               | 695   | 8073   | 2,56 | 1,36E-02 |
| ENSDARG00000060253  | si:ch211-216b21.2  | 19    | 165    | 2,56 | 1,42E-02 |
| ENSDARG00000102824  | pcdh10b            | 17    | 133    | 2,55 | 7,18E-03 |
| ENSDARG00000018944  | hoga1              | 9     | 84     | 2,55 | 1,62E-02 |
| ENSDARG00000101135  | si:dkey-85k7.7     | 145   | 1039   | 2,55 | 1,99E-03 |
| ENSDARG00000063264  | pcdh9              | 147   | 1295   | 2,54 | 1,66E-02 |
| ENSDARG00000074827  | si:ch73-184c24.1   | 19    | 150    | 2,54 | 4,98E-03 |
| ENSDARG00000076858  | TCIM (1 of many)   | 1     | 20     | 2,54 | 2,50E-02 |
| ENSDARG000000055518 | pygma              | 23    | 187    | 2,54 | 1,27E-02 |
| ENSDARG00000040282  | zgc:92590          | 1     | 64     | 2,54 | 2,62E-02 |
| ENSDARG00000103762  | rln1               | 8     | 70     | 2,54 | 1,84E-02 |
| ENSDARG00000037555  | atoh8              | 24    | 188    | 2,53 | 6,54E-03 |
| ENSDARG00000098834  | sox4b              | 20    | 153    | 2,53 | 3,32E-03 |
| ENSDARG00000032317  | tox                | 368   | 2278   | 2,53 | 1,67E-05 |
| ENSDARG00000099144  | igfbp3             | 5     | 63     | 2,52 | 3,55E-02 |
| ENSDARG00000086070  | fgf20b             | 4     | 30     | 2,52 | 4,88E-03 |

|                     |                   |      |       |      |          |
|---------------------|-------------------|------|-------|------|----------|
| ENSDARG00000086374  | isg15             | 19   | 186   | 2,52 | 1,31E-02 |
| ENSDARG00000022424  | slc26a5           | 346  | 2279  | 2,51 | 5,42E-04 |
| ENSDARG00000033655  | stmn1b            | 649  | 4986  | 2,51 | 8,14E-03 |
| ENSDARG00000057714  | cmah              | 97   | 700   | 2,51 | 2,42E-03 |
| ENSDARG00000103937  | ndrg4             | 66   | 491   | 2,50 | 3,85E-03 |
| ENSDARG00000069498  | phkg1b            | 7    | 85    | 2,50 | 2,70E-02 |
| ENSDARG00000032765  | net1              | 9    | 81    | 2,50 | 1,12E-02 |
| ENSDARG000000109360 | FO704848.1        | 10   | 68    | 2,50 | 3,62E-03 |
| ENSDARG00000079895  | ehbp1l1b          | 2    | 29    | 2,50 | 2,45E-02 |
| ENSDARG00000060457  | pmp22b            | 286  | 1984  | 2,49 | 3,06E-03 |
| ENSDARG00000004697  | rxrgb             | 2    | 18    | 2,49 | 3,06E-02 |
| ENSDARG00000069186  | cyp27a1.2         | 5    | 36    | 2,48 | 3,75E-03 |
| ENSDARG000000002656 | stxbp5a           | 241  | 1548  | 2,48 | 5,93E-04 |
| ENSDARG00000069139  | grik1a            | 6    | 59    | 2,48 | 4,26E-02 |
| ENSDARG00000073753  | tacc1             | 16   | 120   | 2,48 | 8,57E-03 |
| ENSDARG00000060368  | syn1              | 18   | 130   | 2,47 | 7,33E-03 |
| ENSDARG00000022378  | mtmr1b            | 98   | 651   | 2,46 | 2,36E-03 |
| ENSDARG00000007982  | onecut1           | 2    | 22    | 2,45 | 4,79E-02 |
| ENSDARG000000039034 | marcksl1a         | 2    | 21    | 2,44 | 2,09E-02 |
| ENSDARG00000104367  | zgc:194469        | 21   | 133   | 2,43 | 1,37E-03 |
| ENSDARG00000097639  | si:ch73-265h17.4  | 5    | 49    | 2,43 | 3,89E-02 |
| ENSDARG00000040198  | fstl5             | 2    | 27    | 2,43 | 4,37E-02 |
| ENSDARG00000038788  | dnai1.2           | 12   | 90    | 2,43 | 1,52E-02 |
| ENSDARG00000098113  | CABZ01007222.1    | 5    | 59    | 2,43 | 4,27E-02 |
| ENSDARG000000079064 | CABZ01079080.1    | 4    | 43    | 2,42 | 4,84E-02 |
| ENSDARG00000090292  | ralyl             | 16   | 137   | 2,41 | 3,70E-02 |
| ENSDARG00000068397  | tns2b             | 9    | 72    | 2,40 | 1,75E-02 |
| ENSDARG00000060496  | cacna1ha          | 8    | 79    | 2,40 | 3,72E-02 |
| ENSDARG00000062122  | klhl5             | 15   | 114   | 2,39 | 1,37E-02 |
| ENSDARG00000058179  | ackr3b            | 22   | 221   | 2,39 | 3,75E-02 |
| ENSDARG00000116871  | BX284638.1        | 18   | 128   | 2,39 | 1,12E-02 |
| ENSDARG00000008100  | slc7a10a          | 71   | 418   | 2,38 | 4,43E-04 |
| ENSDARG00000007461  | srgap1a           | 5    | 37    | 2,38 | 1,42E-02 |
| ENSDARG00000058538  | alcamb            | 2480 | 15162 | 2,38 | 1,64E-03 |
| ENSDARG00000089221  | si:ch211-195o20.7 | 29   | 203   | 2,38 | 1,37E-02 |
| ENSDARG00000076135  | mmrn2a            | 3    | 32    | 2,37 | 4,95E-02 |
| ENSDARG000000078468 | fap               | 2    | 19    | 2,36 | 3,69E-02 |
| ENSDARG00000001656  | psmb13a           | 14   | 86    | 2,36 | 1,48E-03 |
| ENSDARG00000074698  | sdsi              | 10   | 78    | 2,35 | 2,51E-02 |
| ENSDARG00000042978  | cyp2p6            | 98   | 698   | 2,35 | 1,77E-02 |
| ENSDARG00000069726  | glis3             | 7    | 47    | 2,35 | 1,90E-02 |
| ENSDARG00000100822  | mapk15            | 75   | 426   | 2,34 | 4,94E-04 |
| ENSDARG00000044039  | stx11a            | 3    | 30    | 2,34 | 2,65E-02 |
| ENSDARG00000092916  | mlnl              | 28   | 177   | 2,34 | 7,48E-03 |
| ENSDARG00000069464  | cox7a1            | 17   | 117   | 2,34 | 1,43E-02 |
| ENSDARG00000031600  | rd3               | 6    | 45    | 2,33 | 2,54E-02 |
| ENSDARG00000098204  | CU984600.2        | 85   | 511   | 2,33 | 2,96E-03 |
| ENSDARG00000045486  | pawr              | 6    | 35    | 2,33 | 4,99E-03 |
| ENSDARG00000075017  | myzap             | 42   | 243   | 2,33 | 1,85E-03 |
| ENSDARG00000013076  | bmi1b             | 53   | 324   | 2,33 | 4,09E-03 |
| ENSDARG00000074265  | dzip1l            | 2    | 22    | 2,32 | 3,57E-02 |
| ENSDARG00000062263  | arhgap17b         | 27   | 158   | 2,31 | 2,02E-03 |
| ENSDARG00000022650  | cyp2ad3           | 10   | 78    | 2,31 | 3,21E-02 |
| ENSDARG000000070423 | zgc:153157        | 10   | 68    | 2,31 | 1,33E-02 |
| ENSDARG00000069708  | cdc34a            | 10   | 59    | 2,31 | 2,29E-03 |
| ENSDARG00000001880  | stx3a             | 59   | 348   | 2,30 | 3,25E-03 |
| ENSDARG000000091531 | carm1l            | 5    | 34    | 2,30 | 1,39E-02 |
| ENSDARG00000103774  | limch1b           | 52   | 315   | 2,29 | 6,75E-03 |
| ENSDARG00000096703  | si:dkey-1h6.8     | 17   | 120   | 2,29 | 3,08E-02 |
| ENSDARG000000070734 | dyrk4             | 7    | 58    | 2,29 | 4,25E-02 |
| ENSDARG00000093549  | selenop           | 4    | 77    | 2,28 | 2,34E-02 |
| ENSDARG00000052400  | gpr6              | 28   | 176   | 2,28 | 1,72E-02 |
| ENSDARG00000024503  | c6ast3            | 0    | 21    | 2,28 | 3,72E-02 |
| ENSDARG00000103602  | pcdh1a3           | 9    | 52    | 2,28 | 6,07E-03 |
| ENSDARG00000018149  | slc38a4           | 24   | 161   | 2,28 | 1,94E-02 |
| ENSDARG000000091006 | cobl              | 122  | 744   | 2,28 | 8,77E-03 |
| ENSDARG00000060637  | clstn2            | 3    | 30    | 2,27 | 4,16E-02 |
| ENSDARG00000045447  | slc35g2b          | 104  | 609   | 2,27 | 7,94E-03 |
| ENSDARG00000103744  | hacd1             | 8    | 54    | 2,27 | 2,64E-02 |
| ENSDARG00000054208  | phkg2             | 214  | 1165  | 2,26 | 1,34E-03 |
| ENSDARG00000074547  | si:ch211-240l19.8 | 2    | 70    | 2,26 | 4,38E-02 |
| ENSDARG000000020693 | sesn1             | 148  | 890   | 2,26 | 9,21E-03 |
| ENSDARG00000079296  | gcga              | 2295 | 18781 | 2,24 | 3,04E-02 |

|                     |                   |      |      |      |          |
|---------------------|-------------------|------|------|------|----------|
| ENSDARG00000074316  | itga1             | 59   | 429  | 2,23 | 4,38E-02 |
| ENSDARG00000069681  | pcgf6             | 7    | 41   | 2,23 | 5,74E-03 |
| ENSDARG00000033285  | gsto2             | 29   | 178  | 2,23 | 1,55E-02 |
| ENSDARG00000079977  | nhsb              | 191  | 1156 | 2,23 | 1,89E-02 |
| ENSDARG00000015805  | cgnl1             | 20   | 117  | 2,23 | 1,63E-02 |
| ENSDARG00000003219  | bin2a             | 7    | 51   | 2,22 | 4,04E-02 |
| ENSDARG00000079738  | znf219            | 19   | 124  | 2,22 | 2,27E-02 |
| ENSDARG000000107280 | FO744833.1        | 2    | 19   | 2,22 | 4,53E-02 |
| ENSDARG00000035544  | etnppl            | 4    | 31   | 2,22 | 3,14E-02 |
| ENSDARG00000011373  | mknk2a            | 12   | 69   | 2,21 | 6,66E-03 |
| ENSDARG00000015016  | kif26ab           | 4    | 29   | 2,21 | 4,38E-02 |
| ENSDARG00000038095  | socs1a            | 6    | 42   | 2,21 | 3,14E-02 |
| ENSDARG00000015374  | st3gal3a          | 73   | 371  | 2,21 | 5,03E-04 |
| ENSDARG00000009610  | rgs12a            | 7    | 52   | 2,21 | 4,99E-02 |
| ENSDARG00000075972  | csnnp2            | 66   | 366  | 2,20 | 8,07E-03 |
| ENSDARG00000068193  | tmem44            | 5    | 29   | 2,19 | 1,37E-02 |
| ENSDARG00000088911  | cbln17            | 4    | 28   | 2,19 | 2,66E-02 |
| ENSDARG00000054649  | rac1l             | 3    | 20   | 2,18 | 1,82E-02 |
| ENSDARG000000002196 | bach1b            | 54   | 269  | 2,17 | 6,29E-04 |
| ENSDARG00000079705  | si:ch211-152p11.4 | 86   | 443  | 2,17 | 3,45E-03 |
| ENSDARG00000003818  | prkag1            | 245  | 1169 | 2,17 | 8,38E-05 |
| ENSDARG00000071662  | si:rp71-36a1.3    | 46   | 241  | 2,17 | 4,13E-03 |
| ENSDARG00000024101  | adra1d            | 312  | 1903 | 2,16 | 4,13E-02 |
| ENSDARG00000075201  | inpp4b            | 103  | 534  | 2,16 | 4,08E-03 |
| ENSDARG00000017494  | tgfbr1a           | 6    | 35   | 2,16 | 1,05E-02 |
| ENSDARG00000058302  | sh3bgrl           | 17   | 95   | 2,16 | 1,44E-02 |
| ENSDARG00000018159  | ano10b            | 18   | 112  | 2,15 | 3,47E-02 |
| ENSDARG00000055158  | prox1a            | 66   | 343  | 2,15 | 5,25E-03 |
| ENSDARG00000070213  | etnk2             | 188  | 951  | 2,15 | 2,93E-03 |
| ENSDARG00000053857  | ccdc187           | 23   | 116  | 2,14 | 1,42E-03 |
| ENSDARG000000020133 | jdp2b             | 12   | 80   | 2,14 | 3,75E-02 |
| ENSDARG00000037852  | zgc:101663        | 15   | 74   | 2,14 | 3,32E-03 |
| ENSDARG00000089463  | dhx58             | 16   | 95   | 2,13 | 2,31E-02 |
| ENSDARG00000030844  | klf11a            | 199  | 1131 | 2,12 | 2,53E-02 |
| ENSDARG00000062152  | chaf1a            | 17   | 94   | 2,12 | 1,21E-02 |
| ENSDARG00000069160  | fam19a5a          | 72   | 335  | 2,11 | 6,82E-04 |
| ENSDARG000000032951 | nrbp2a            | 114  | 648  | 2,10 | 4,05E-02 |
| ENSDARG00000009534  | wls               | 202  | 921  | 2,10 | 1,34E-04 |
| ENSDARG00000042876  | abracl            | 5    | 31   | 2,10 | 1,98E-02 |
| ENSDARG00000025218  | myo5ab            | 29   | 182  | 2,10 | 4,72E-02 |
| ENSDARG00000059247  | tmem54a           | 30   | 146  | 2,10 | 2,37E-03 |
| ENSDARG00000034907  | paqr7b            | 24   | 123  | 2,10 | 8,56E-03 |
| ENSDARG000000101865 | pcdh1g30          | 31   | 160  | 2,09 | 1,30E-02 |
| ENSDARG00000046098  | ebp               | 6    | 35   | 2,09 | 2,03E-02 |
| ENSDARG000000101911 | si:dkeyp-86d6.2   | 27   | 138  | 2,08 | 9,09E-03 |
| ENSDARG00000075314  | zgc:174906        | 31   | 150  | 2,08 | 4,26E-03 |
| ENSDARG00000037655  | pls3              | 65   | 295  | 2,08 | 3,82E-04 |
| ENSDARG000000090062 | rac3a             | 27   | 125  | 2,07 | 2,20E-03 |
| ENSDARG000000101090 | pappaa            | 9    | 133  | 2,07 | 3,98E-02 |
| ENSDARG00000054087  | irs1              | 111  | 545  | 2,06 | 9,24E-03 |
| ENSDARG00000074363  | TTC9              | 53   | 238  | 2,06 | 5,75E-04 |
| ENSDARG00000075249  | fam171a2a         | 26   | 140  | 2,06 | 3,87E-02 |
| ENSDARG00000013649  | casr              | 643  | 2926 | 2,05 | 1,29E-03 |
| ENSDARG000000095830 | serpinb1l1        | 7    | 39   | 2,05 | 2,89E-02 |
| ENSDARG00000069171  | gramd4a           | 35   | 171  | 2,05 | 1,03E-02 |
| ENSDARG00000013628  | cd164             | 1435 | 6435 | 2,04 | 7,84E-04 |
| ENSDARG00000055463  | lrit3a            | 20   | 93   | 2,04 | 1,96E-03 |
| ENSDARG00000043406  | slc8a1b           | 54   | 280  | 2,04 | 3,18E-02 |
| ENSDARG00000019845  | pdlim1            | 19   | 93   | 2,04 | 1,25E-02 |
| ENSDARG000000001463 | tdh2              | 38   | 175  | 2,04 | 2,52E-03 |
| ENSDARG00000079659  | wdr53             | 8    | 40   | 2,03 | 7,47E-03 |
| ENSDARG00000006283  | waslb             | 63   | 279  | 2,02 | 1,43E-03 |
| ENSDARG00000055751  | fosb              | 416  | 2023 | 2,02 | 1,69E-02 |
| ENSDARG00000093714  | artnb             | 70   | 320  | 2,02 | 4,47E-03 |
| ENSDARG00000038222  | tyw3              | 7    | 38   | 2,01 | 3,39E-02 |
| ENSDARG000000035563 | znf703            | 7    | 34   | 2,01 | 1,90E-02 |
| ENSDARG00000095295  | si:rp71-36a1.1    | 38   | 204  | 2,00 | 4,28E-02 |
| ENSDARG00000095719  | si:dkey-222h21.2  | 4    | 18   | 2,00 | 4,20E-02 |
| ENSDARG00000003486  | ppp1caa           | 1601 | 7003 | 2,00 | 1,48E-03 |
| ENSDARG00000086856  | stk35             | 72   | 339  | 2,00 | 1,49E-02 |
| ENSDARG00000094210  | zgc:109934        | 18   | 89   | 1,99 | 1,53E-02 |
| ENSDARG00000071487  | zgc:152948        | 5    | 25   | 1,98 | 3,90E-02 |
| ENSDARG00000074812  | fhdc1             | 31   | 144  | 1,98 | 1,34E-02 |

|                     |                   |      |       |      |          |
|---------------------|-------------------|------|-------|------|----------|
| ENSDARG00000076716  | palb2             | 4    | 20    | 1,98 | 3,02E-02 |
| ENSDARG00000052604  | cpeb2             | 28   | 139   | 1,98 | 3,77E-02 |
| ENSDARG00000069595  | si:ch211-214c7.4  | 35   | 158   | 1,98 | 7,96E-03 |
| ENSDARG00000008494  | myl6              | 159  | 669   | 1,98 | 5,55E-04 |
| ENSDARG00000052690  | arrdc3a           | 521  | 2381  | 1,98 | 1,14E-02 |
| ENSDARG00000044319  | fstl4             | 71   | 323   | 1,98 | 8,75E-03 |
| ENSDARG00000002013  | grb10a            | 77   | 372   | 1,97 | 2,47E-02 |
| ENSDARG000000103551 | rnf213b           | 37   | 176   | 1,97 | 2,25E-02 |
| ENSDARG00000020623  | baxa              | 50   | 204   | 1,95 | 1,86E-04 |
| ENSDARG00000034168  | serpini1          | 332  | 1433  | 1,95 | 5,35E-03 |
| ENSDARG00000013082  | uap1l1            | 16   | 78    | 1,95 | 3,53E-02 |
| ENSDARG00000005897  | dera              | 183  | 738   | 1,95 | 1,07E-04 |
| ENSDARG000000019420 | etnk1             | 490  | 1995  | 1,95 | 3,23E-04 |
| ENSDARG00000016866  | fam102ab          | 85   | 376   | 1,94 | 1,30E-02 |
| ENSDARG00000043710  | parvaa            | 17   | 76    | 1,94 | 6,88E-03 |
| ENSDARG00000054300  | dhrrs1            | 769  | 3075  | 1,93 | 1,94E-04 |
| ENSDARG00000079805  | tagln3a           | 22   | 95    | 1,93 | 1,50E-02 |
| ENSDARG00000031814  | dhrrs13b          | 12   | 58    | 1,93 | 3,80E-02 |
| ENSDARG000000078536 | si:ch211-158d24.2 | 50   | 214   | 1,92 | 9,71E-03 |
| ENSDARG00000005780  | npys8br           | 333  | 1381  | 1,92 | 3,19E-03 |
| ENSDARG00000039852  | ftr93             | 18   | 85    | 1,92 | 3,19E-02 |
| ENSDARG000000095019 | lmo2              | 33   | 152   | 1,92 | 2,98E-02 |
| ENSDARG00000003835  | stom              | 145  | 620   | 1,91 | 9,99E-03 |
| ENSDARG000000089177 | cyp46a1.3         | 10   | 45    | 1,90 | 2,34E-02 |
| ENSDARG000000039422 | fuom              | 15   | 64    | 1,89 | 1,05E-02 |
| ENSDARG00000079397  | cerkl             | 40   | 156   | 1,88 | 1,40E-03 |
| ENSDARG00000068629  | cd151l            | 88   | 346   | 1,87 | 9,26E-04 |
| ENSDARG000000012600 | si:dkey-97a13.6   | 25   | 106   | 1,87 | 2,53E-02 |
| ENSDARG000000099379 | ppp4r1l           | 138  | 546   | 1,87 | 2,73E-03 |
| ENSDARG00000054588  | cox6a2            | 159  | 673   | 1,87 | 1,46E-02 |
| ENSDARG000000031348 | mc5ra             | 355  | 1473  | 1,87 | 1,30E-02 |
| ENSDARG00000069430  | tp53i11a          | 42   | 184   | 1,87 | 3,48E-02 |
| ENSDARG00000075163  | cxcl20            | 92   | 376   | 1,87 | 9,32E-03 |
| ENSDARG00000043856  | amd1              | 3173 | 12174 | 1,87 | 4,28E-04 |
| ENSDARG00000068732  | spry4             | 636  | 2640  | 1,86 | 1,34E-02 |
| ENSDARG000000093760 | si:ch211-197h24.9 | 26   | 114   | 1,85 | 4,74E-02 |
| ENSDARG000000055831 | si:dkey-182g1.6   | 13   | 60    | 1,85 | 3,36E-02 |
| ENSDARG00000101534  | rab3db            | 450  | 1729  | 1,85 | 1,24E-03 |
| ENSDARG00000069150  | rit1              | 33   | 143   | 1,85 | 3,71E-02 |
| ENSDARG00000009881  | ier5              | 455  | 1950  | 1,85 | 3,22E-02 |
| ENSDARG00000021987  | plecb             | 265  | 1054  | 1,85 | 6,95E-03 |
| ENSDARG00000077791  | brsk2b            | 38   | 163   | 1,84 | 3,41E-02 |
| ENSDARG000000075158 | igdcc3            | 103  | 427   | 1,84 | 2,03E-02 |
| ENSDARG00000086490  | si:dkey-92f12.2   | 38   | 151   | 1,84 | 1,10E-02 |
| ENSDARG00000038964  | traf4b            | 5    | 20    | 1,84 | 4,94E-02 |
| ENSDARG00000034181  | esr2b             | 52   | 217   | 1,83 | 2,38E-02 |
| ENSDARG00000074163  | zgc:162879        | 8    | 32    | 1,83 | 2,49E-02 |
| ENSDARG00000054454  | epha4a            | 434  | 1693  | 1,83 | 5,81E-03 |
| ENSDARG00000008310  | ip6k2a            | 359  | 1418  | 1,83 | 9,91E-03 |
| ENSDARG00000030723  | cldn11b           | 5    | 22    | 1,82 | 4,94E-02 |
| ENSDARG00000018524  | midn              | 2470 | 9492  | 1,82 | 4,14E-03 |
| ENSDARG00000021869  | rcan2             | 82   | 321   | 1,82 | 8,19E-03 |
| ENSDARG00000015709  | hsd17b12a         | 139  | 520   | 1,82 | 1,11E-03 |
| ENSDARG000000087413 | bean1             | 151  | 579   | 1,81 | 4,68E-03 |
| ENSDARG00000030803  | zgc:110006        | 19   | 78    | 1,81 | 3,74E-02 |
| ENSDARG00000045465  | lancl2            | 111  | 421   | 1,81 | 3,87E-03 |
| ENSDARG00000040815  | tsku              | 25   | 104   | 1,80 | 4,71E-02 |
| ENSDARG00000034262  | pld2              | 84   | 318   | 1,80 | 3,50E-03 |
| ENSDARG00000061817  | kif1aa            | 109  | 422   | 1,80 | 8,84E-03 |
| ENSDARG000000076752 | tmem67            | 29   | 115   | 1,80 | 1,94E-02 |
| ENSDARG00000039512  | ap1m3             | 13   | 52    | 1,80 | 2,14E-02 |
| ENSDARG00000026178  | ube3d             | 11   | 45    | 1,80 | 2,91E-02 |
| ENSDARG00000079124  | si:dkeyp-94h10.5  | 25   | 99    | 1,80 | 1,33E-02 |
| ENSDARG00000004115  | mgat4b            | 117  | 442   | 1,80 | 5,32E-03 |
| ENSDARG00000038655  | ajap1             | 33   | 135   | 1,80 | 3,22E-02 |
| ENSDARG000000036179 | myo1ea            | 192  | 719   | 1,80 | 3,94E-03 |
| ENSDARG00000012972  | cfll1             | 23   | 97    | 1,79 | 3,52E-02 |
| ENSDARG00000031647  | stat2             | 111  | 427   | 1,79 | 9,49E-03 |
| ENSDARG00000006314  | itgav             | 70   | 257   | 1,79 | 2,00E-03 |
| ENSDARG00000004937  | skp2              | 4    | 18    | 1,79 | 1,55E-02 |
| ENSDARG00000030472  | slc16a5a          | 35   | 138   | 1,78 | 2,37E-02 |
| ENSDARG000000043210 | nfic              | 75   | 295   | 1,78 | 1,94E-02 |
| ENSDARG00000053205  | ppfia4            | 220  | 832   | 1,78 | 1,10E-02 |

|                     |                   |     |      |      |          |
|---------------------|-------------------|-----|------|------|----------|
| ENSDARG00000023958  | rnf181            | 38  | 138  | 1,77 | 1,22E-03 |
| ENSDARG00000008034  | skib              | 90  | 338  | 1,77 | 1,23E-02 |
| ENSDARG00000069101  | napbb             | 648 | 2456 | 1,77 | 1,35E-02 |
| ENSDARG00000062702  | ankmy1            | 25  | 98   | 1,76 | 1,45E-02 |
| ENSDARG00000101928  | gorasp1b          | 9   | 36   | 1,76 | 2,85E-02 |
| ENSDARG00000036493  | si:ch73-174h16.4  | 18  | 69   | 1,76 | 1,10E-02 |
| ENSDARG00000055092  | pora              | 88  | 319  | 1,76 | 2,39E-03 |
| ENSDARG000000091602 | si:dkey-163f14.6  | 48  | 187  | 1,76 | 3,22E-02 |
| ENSDARG00000009336  | aif1l             | 96  | 341  | 1,76 | 6,34E-04 |
| ENSDARG00000037884  | rab30             | 164 | 591  | 1,75 | 3,36E-03 |
| ENSDARG00000017489  | zgc:123068        | 242 | 901  | 1,75 | 1,10E-02 |
| ENSDARG00000056519  | si:dkey-280e21.3  | 160 | 595  | 1,75 | 1,30E-02 |
| ENSDARG000000015199 | cblb              | 669 | 2487 | 1,74 | 1,46E-02 |
| ENSDARG00000055099  | fam184b           | 154 | 562  | 1,74 | 8,33E-03 |
| ENSDARG00000074305  | si:ch73-257c13.2  | 28  | 101  | 1,74 | 6,61E-03 |
| ENSDARG00000032761  | pde4d             | 41  | 153  | 1,74 | 1,77E-02 |
| ENSDARG00000023498  | gmppab            | 53  | 194  | 1,74 | 7,58E-03 |
| ENSDARG00000037030  | casz1             | 45  | 175  | 1,74 | 3,50E-02 |
| ENSDARG000000041925 | cryba2b           | 7   | 29   | 1,73 | 4,94E-02 |
| ENSDARG00000088862  | stxbp6            | 466 | 1721 | 1,73 | 1,84E-02 |
| ENSDARG00000089066  | nhs12             | 293 | 1048 | 1,73 | 6,21E-03 |
| ENSDARG000000094791 | si:dkey-193n17.9  | 10  | 38   | 1,72 | 2,91E-02 |
| ENSDARG00000002826  | cep57l1           | 22  | 87   | 1,72 | 3,90E-02 |
| ENSDARG00000078404  | cdh26.1           | 21  | 79   | 1,72 | 3,26E-02 |
| ENSDARG000000014871 | syng3a            | 28  | 102  | 1,72 | 7,58E-03 |
| ENSDARG00000061579  | myo1cb            | 125 | 450  | 1,72 | 1,05E-02 |
| ENSDARG00000060309  | srgap3            | 196 | 688  | 1,72 | 3,38E-03 |
| ENSDARG00000043131  | BX664625.1        | 10  | 40   | 1,71 | 4,84E-02 |
| ENSDARG00000042122  | acot11b           | 83  | 316  | 1,71 | 4,82E-02 |
| ENSDARG00000051749  | tigara            | 20  | 74   | 1,71 | 2,04E-02 |
| ENSDARG000000063686 | atp23             | 8   | 33   | 1,70 | 4,14E-02 |
| ENSDARG00000087780  | tiam2a            | 80  | 278  | 1,70 | 5,27E-03 |
| ENSDARG00000011027  | fgfr1a            | 554 | 1948 | 1,70 | 8,84E-03 |
| ENSDARG00000021664  | fzd3a             | 57  | 210  | 1,69 | 3,45E-02 |
| ENSDARG00000068586  | CDHR2             | 297 | 1017 | 1,69 | 2,52E-03 |
| ENSDARG00000043416  | tnfaip2a          | 311 | 1061 | 1,69 | 1,85E-03 |
| ENSDARG000000079586 | gabrb2            | 103 | 374  | 1,69 | 2,94E-02 |
| ENSDARG00000028164  | cst14a.1          | 10  | 36   | 1,68 | 4,31E-02 |
| ENSDARG00000079236  | si:dkey-253d23.11 | 5   | 18   | 1,67 | 2,15E-02 |
| ENSDARG00000060338  | trmt12            | 21  | 76   | 1,67 | 1,75E-02 |
| ENSDARG00000021113  | ptmaa             | 222 | 758  | 1,67 | 4,86E-03 |
| ENSDARG00000033599  | zgc:100906        | 143 | 485  | 1,67 | 3,89E-03 |
| ENSDARG000000093687 | si:dkey-193c22.1  | 106 | 359  | 1,67 | 3,43E-03 |
| ENSDARG00000075858  | fam155a           | 79  | 273  | 1,67 | 1,35E-02 |
| ENSDARG00000005590  | mtf2              | 6   | 24   | 1,66 | 3,77E-02 |
| ENSDARG00000004402  | elovl6            | 78  | 257  | 1,66 | 6,63E-04 |
| ENSDARG00000070498  | phyhiplb          | 138 | 510  | 1,66 | 4,42E-02 |
| ENSDARG00000103848  | apba1a            | 48  | 166  | 1,66 | 9,40E-03 |
| ENSDARG00000056888  | dnah5l            | 88  | 318  | 1,66 | 4,25E-02 |
| ENSDARG00000093412  | sertad2a          | 19  | 65   | 1,66 | 1,15E-02 |
| ENSDARG00000086699  | smim15            | 40  | 134  | 1,65 | 2,05E-03 |
| ENSDARG00000016427  | fign1l            | 22  | 76   | 1,65 | 1,42E-02 |
| ENSDARG00000035918  | bzw2              | 86  | 290  | 1,65 | 1,22E-02 |
| ENSDARG000000074030 | myt1a             | 156 | 511  | 1,65 | 1,51E-03 |
| ENSDARG00000045661  | irf7              | 59  | 206  | 1,64 | 3,52E-02 |
| ENSDARG00000012040  | rnf19a            | 348 | 1152 | 1,64 | 4,63E-03 |
| ENSDARG00000007657  | ccnh              | 37  | 126  | 1,64 | 8,76E-03 |
| ENSDARG00000007975  | fth1b             | 26  | 90   | 1,64 | 1,63E-02 |
| ENSDARG00000104409  | tnk2b             | 71  | 246  | 1,63 | 3,08E-02 |
| ENSDARG00000000476  | pms1              | 11  | 38   | 1,63 | 2,53E-02 |
| ENSDARG00000104478  | cap2              | 88  | 295  | 1,63 | 1,14E-02 |
| ENSDARG00000035957  | gmnn              | 27  | 94   | 1,63 | 2,73E-02 |
| ENSDARG00000093864  | wee1              | 26  | 91   | 1,63 | 3,17E-02 |
| ENSDARG00000060215  | cep85             | 37  | 120  | 1,62 | 7,13E-03 |
| ENSDARG00000021239  | apaf1             | 113 | 365  | 1,62 | 2,88E-03 |
| ENSDARG000000093117 | si:dkey-266m15.7  | 16  | 55   | 1,62 | 2,98E-02 |
| ENSDARG00000023858  | ccdc174           | 76  | 242  | 1,61 | 8,20E-04 |
| ENSDARG00000078077  | dph2              | 12  | 43   | 1,61 | 3,55E-02 |
| ENSDARG00000069940  | ppap2d            | 303 | 964  | 1,60 | 2,08E-03 |
| ENSDARG00000076246  | prune             | 27  | 90   | 1,59 | 2,15E-02 |
| ENSDARG00000090882  | si:rp71-36a1.5    | 69  | 240  | 1,59 | 4,95E-02 |
| ENSDARG00000079884  | trim107           | 26  | 86   | 1,59 | 1,60E-02 |
| ENSDARG00000005675  | sec61a1l          | 347 | 1089 | 1,59 | 1,66E-03 |

|                     |                   |      |      |      |          |
|---------------------|-------------------|------|------|------|----------|
| ENSDARG00000070261  | crlf3             | 44   | 146  | 1,59 | 3,48E-02 |
| ENSDARG00000009242  | fev               | 832  | 2637 | 1,58 | 4,86E-03 |
| ENSDARG00000060306  | tfcp2             | 633  | 1978 | 1,58 | 1,52E-03 |
| ENSDARG00000032188  | lrrc8aa           | 76   | 244  | 1,58 | 1,12E-02 |
| ENSDARG00000088967  | wnk4b             | 956  | 3120 | 1,58 | 2,19E-02 |
| ENSDARG00000112454  | FO744833.2        | 19   | 61   | 1,58 | 1,44E-02 |
| ENSDARG00000044001  | lgals3b           | 22   | 73   | 1,57 | 1,94E-02 |
| ENSDARG000000021607 | negr1             | 68   | 216  | 1,57 | 1,11E-02 |
| ENSDARG00000034001  | tango6            | 13   | 43   | 1,57 | 1,77E-02 |
| ENSDARG00000014017  | rrm1              | 23   | 72   | 1,56 | 1,53E-02 |
| ENSDARG00000013000  | ppfia2            | 33   | 108  | 1,56 | 3,70E-02 |
| ENSDARG00000088663  | lman2lb           | 84   | 264  | 1,56 | 6,51E-03 |
| ENSDARG000000034771 | rab13             | 39   | 126  | 1,56 | 3,39E-02 |
| ENSDARG00000003193  | rassf7b           | 28   | 92   | 1,56 | 2,17E-02 |
| ENSDARG00000076221  | zgc:198419        | 148  | 473  | 1,56 | 1,86E-02 |
| ENSDARG00000099106  | afmid             | 12   | 39   | 1,55 | 4,18E-02 |
| ENSDARG00000106873  | LO018188.1        | 163  | 523  | 1,55 | 2,50E-02 |
| ENSDARG00000020212  | slc1a1            | 16   | 53   | 1,55 | 4,91E-02 |
| ENSDARG00000114852  | CR974456.1        | 65   | 212  | 1,55 | 3,98E-02 |
| ENSDARG00000026090  | adprm             | 38   | 121  | 1,54 | 3,09E-02 |
| ENSDARG00000057625  | dusp14            | 46   | 138  | 1,53 | 1,26E-03 |
| ENSDARG00000079578  | rbpms2b           | 31   | 101  | 1,53 | 4,33E-02 |
| ENSDARG00000101348  | plppr5b           | 75   | 233  | 1,53 | 1,64E-02 |
| ENSDARG00000006754  | mlt3              | 42   | 132  | 1,52 | 3,60E-02 |
| ENSDARG000000062083 | dph7              | 16   | 52   | 1,52 | 4,16E-02 |
| ENSDARG00000059646  | nt5dc2            | 298  | 939  | 1,52 | 3,43E-02 |
| ENSDARG00000087402  | TPM1 (1 of many)  | 153  | 475  | 1,52 | 2,39E-02 |
| ENSDARG00000043821  | klf7b             | 323  | 982  | 1,52 | 1,16E-02 |
| ENSDARG00000070539  | arf3a             | 81   | 246  | 1,51 | 9,08E-03 |
| ENSDARG00000094343  | si:dkey-20i20.8   | 13   | 41   | 1,51 | 2,04E-02 |
| ENSDARG000000013950 | pdf               | 10   | 33   | 1,51 | 3,71E-02 |
| ENSDARG00000027887  | zfyve21           | 187  | 547  | 1,50 | 6,39E-04 |
| ENSDARG00000062054  | cpt1ab            | 277  | 849  | 1,50 | 2,37E-02 |
| ENSDARG00000102061  | b3galt2           | 114  | 336  | 1,49 | 6,17E-03 |
| ENSDARG00000089877  | si:dkeyp-75h12.5  | 397  | 1162 | 1,49 | 2,44E-03 |
| ENSDARG00000093003  | acy3.1            | 9    | 27   | 1,49 | 2,41E-02 |
| ENSDARG000000062790 | CU639469.1        | 535  | 1549 | 1,48 | 1,54E-03 |
| ENSDARG00000063646  | lnpa              | 45   | 132  | 1,48 | 6,34E-03 |
| ENSDARG00000090986  | si:dkeyp-115e12.6 | 63   | 187  | 1,48 | 1,65E-02 |
| ENSDARG00000060796  | slc20a2           | 210  | 615  | 1,47 | 1,10E-02 |
| ENSDARG00000058038  | eml3              | 50   | 149  | 1,47 | 2,26E-02 |
| ENSDARG00000090872  | si:dkey-276j7.1   | 181  | 526  | 1,47 | 5,74E-03 |
| ENSDARG000000076362 | tmem260           | 18   | 54   | 1,47 | 3,36E-02 |
| ENSDARG00000004325  | casp9             | 69   | 199  | 1,47 | 5,78E-03 |
| ENSDARG00000004262  | cyp46a1.2         | 25   | 75   | 1,46 | 1,15E-02 |
| ENSDARG00000007654  | nsfa              | 474  | 1347 | 1,46 | 1,74E-03 |
| ENSDARG00000003989  | crhr1             | 58   | 169  | 1,45 | 2,17E-02 |
| ENSDARG000000092228 | si:dkey-27p18.3   | 58   | 168  | 1,45 | 1,28E-02 |
| ENSDARG00000040505  | yif1b             | 21   | 62   | 1,45 | 8,03E-03 |
| ENSDARG00000021143  | rtn1b             | 871  | 2531 | 1,45 | 1,90E-02 |
| ENSDARG00000045087  | cdk5r1b           | 87   | 258  | 1,45 | 4,94E-02 |
| ENSDARG00000086808  | ddhd1a            | 55   | 163  | 1,45 | 4,31E-02 |
| ENSDARG00000101979  | eps8l3a           | 47   | 136  | 1,45 | 1,49E-02 |
| ENSDARG00000009336  | mvda              | 20   | 59   | 1,45 | 2,80E-02 |
| ENSDARG00000045485  | rassf8b           | 20   | 58   | 1,44 | 4,56E-02 |
| ENSDARG00000079438  | pkp3b             | 72   | 206  | 1,44 | 1,24E-02 |
| ENSDARG000000063711 | trim3a            | 93   | 260  | 1,44 | 1,15E-03 |
| ENSDARG00000103542  | vegfaa            | 479  | 1334 | 1,44 | 1,04E-03 |
| ENSDARG00000021209  | kctd9a            | 174  | 497  | 1,43 | 1,57E-02 |
| ENSDARG000000088072 | usp43b            | 59   | 171  | 1,43 | 3,05E-02 |
| ENSDARG00000002949  | ppp6c             | 557  | 1542 | 1,43 | 1,56E-03 |
| ENSDARG00000035578  | hs3st1l2          | 96   | 270  | 1,42 | 7,27E-03 |
| ENSDARG00000008487  | dmd               | 116  | 325  | 1,42 | 1,03E-02 |
| ENSDARG00000056152  | fam3c             | 238  | 662  | 1,42 | 3,64E-03 |
| ENSDARG00000014704  | pgm2l1            | 167  | 462  | 1,42 | 2,23E-03 |
| ENSDARG000000063169 | ubn1              | 12   | 35   | 1,42 | 9,28E-03 |
| ENSDARG00000054442  | cbx1b             | 80   | 222  | 1,42 | 4,24E-03 |
| ENSDARG00000061691  | qpctla            | 65   | 177  | 1,41 | 2,29E-04 |
| ENSDARG00000006567  | dus4l             | 28   | 77   | 1,40 | 7,37E-03 |
| ENSDARG00000061713  | tpd52             | 289  | 792  | 1,40 | 3,29E-03 |
| ENSDARG00000094345  | si:dkey-261l7.2   | 34   | 95   | 1,40 | 3,01E-02 |
| ENSDARG00000103720  | zgc:162730        | 2100 | 5729 | 1,40 | 3,33E-03 |
| ENSDARG00000030716  | ing4              | 42   | 119  | 1,40 | 3,11E-02 |

|                      |                   |      |      |      |          |
|----------------------|-------------------|------|------|------|----------|
| ENSDARG00000033516   | efr3ba            | 843  | 2353 | 1,40 | 2,23E-02 |
| ENSDARG00000019503   | zgc:103759        | 11   | 31   | 1,39 | 3,42E-02 |
| ENSDARG00000004840   | rassf1            | 190  | 511  | 1,39 | 1,11E-03 |
| ENSDARG00000019335   | hes6              | 87   | 235  | 1,38 | 6,81E-03 |
| ENSDARG000000058219  | tubd1             | 50   | 137  | 1,38 | 2,31E-02 |
| ENSDARG000000037932  | lin7b             | 117  | 318  | 1,38 | 7,37E-03 |
| ENSDARG00000101367   | si:ch73-193i22.1  | 121  | 340  | 1,38 | 3,75E-02 |
| ENSDARG000000109820  | NPAS3             | 44   | 122  | 1,38 | 2,50E-02 |
| ENSDARG000000035433  | arpc5lb           | 74   | 203  | 1,38 | 8,03E-03 |
| ENSDARG00000018976   | sptlc2a           | 214  | 575  | 1,37 | 3,96E-03 |
| ENSDARG000000025855  | camk2n1a          | 871  | 2379 | 1,37 | 2,06E-02 |
| ENSDARG000000063446  | iba57             | 84   | 229  | 1,37 | 2,57E-02 |
| ENSDARG000000000837  | snx9a             | 180  | 497  | 1,37 | 3,57E-02 |
| ENSDARG000000091555  | ostf1             | 84   | 229  | 1,37 | 2,61E-02 |
| ENSDARG000000030479  | hmgb1b            | 700  | 1848 | 1,36 | 1,27E-03 |
| ENSDARG000000063075  | soga1             | 203  | 546  | 1,35 | 2,59E-02 |
| ENSDARG000000054864  | aplp2             | 1509 | 3974 | 1,33 | 1,47E-02 |
| ENSDARG00000104015   | fgfr1bl           | 41   | 110  | 1,33 | 4,95E-02 |
| ENSDARG0000000033413 | acot18            | 106  | 276  | 1,33 | 6,67E-03 |
| ENSDARG000000045131  | id4               | 210  | 542  | 1,33 | 3,33E-03 |
| ENSDARG000000036102  | ctdsp2            | 93   | 247  | 1,33 | 2,98E-02 |
| ENSDARG000000035870  | laptm4b           | 562  | 1443 | 1,32 | 2,41E-03 |
| ENSDARG000000005772  | tsr2              | 23   | 62   | 1,32 | 3,40E-02 |
| ENSDARG00000104767   | CR381531.2        | 66   | 174  | 1,32 | 2,83E-02 |
| ENSDARG0000000035329 | capns1a           | 204  | 523  | 1,31 | 3,75E-03 |
| ENSDARG000000055477  | pelo              | 124  | 327  | 1,31 | 3,42E-02 |
| ENSDARG000000020841  | rbm7              | 21   | 54   | 1,30 | 2,08E-02 |
| ENSDARG000000033539  | paics             | 88   | 224  | 1,30 | 5,16E-03 |
| ENSDARG000000053452  | pop5              | 21   | 54   | 1,30 | 2,14E-02 |
| ENSDARG00000018966   | cyb5r1            | 272  | 689  | 1,30 | 2,68E-03 |
| ENSDARG0000000061314 | ngrn              | 38   | 100  | 1,30 | 4,33E-02 |
| ENSDARG000000068787  | slc6a17           | 276  | 705  | 1,30 | 1,14E-02 |
| ENSDARG000000030914  | tmem120a          | 33   | 87   | 1,30 | 4,02E-02 |
| ENSDARG000000061800  | si:dkey-208k22.6  | 87   | 222  | 1,30 | 5,86E-03 |
| ENSDARG000000087369  | cep162            | 33   | 85   | 1,30 | 3,14E-02 |
| ENSDARG000000037260  | toporsa           | 40   | 103  | 1,30 | 1,32E-02 |
| ENSDARG0000000019236 | gsr               | 90   | 229  | 1,30 | 6,90E-03 |
| ENSDARG000000000151  | thraa             | 84   | 213  | 1,29 | 6,27E-03 |
| ENSDARG000000043548  | atg4da            | 31   | 81   | 1,29 | 2,08E-02 |
| ENSDARG000000029865  | rassf2a           | 122  | 311  | 1,29 | 1,30E-02 |
| ENSDARG000000060515  | zdhhc9            | 120  | 307  | 1,29 | 1,76E-02 |
| ENSDARG000000069279  | elovl7a           | 25   | 65   | 1,29 | 1,89E-02 |
| ENSDARG0000000021309 | rhoca             | 132  | 333  | 1,29 | 8,06E-03 |
| ENSDARG00000102846   | trmt13            | 16   | 42   | 1,28 | 2,60E-02 |
| ENSDARG000000099511  | CABZ01034698.2    | 32   | 82   | 1,28 | 3,70E-02 |
| ENSDARG000000071594  | TIMM21            | 42   | 107  | 1,28 | 3,72E-02 |
| ENSDARG000000039270  | vti1b             | 61   | 154  | 1,28 | 2,16E-02 |
| ENSDARG0000000088972 | si:dkey-238d18.4  | 137  | 349  | 1,28 | 3,23E-02 |
| ENSDARG000000092889  | zgc:194246        | 29   | 73   | 1,27 | 7,38E-03 |
| ENSDARG000000074628  | si:dkey-10o6.2    | 61   | 157  | 1,27 | 4,74E-02 |
| ENSDARG000000040971  | zgc:92606         | 404  | 1004 | 1,26 | 8,60E-03 |
| ENSDARG000000099226  | PPP1CC            | 222  | 564  | 1,26 | 4,82E-02 |
| ENSDARG000000021753  | ccdc25            | 222  | 547  | 1,26 | 3,62E-03 |
| ENSDARG0000000092364 | si:ch211-218c6.8  | 40   | 99   | 1,26 | 2,37E-02 |
| ENSDARG000000057114  | hpf1              | 123  | 301  | 1,26 | 2,48E-03 |
| ENSDARG00000114038   | ska2              | 74   | 183  | 1,25 | 7,87E-03 |
| ENSDARG000000060445  | elp6              | 41   | 103  | 1,24 | 4,46E-02 |
| ENSDARG000000042732  | tmem189           | 79   | 194  | 1,24 | 1,49E-02 |
| ENSDARG000000041665  | mkrn1             | 102  | 252  | 1,24 | 3,24E-02 |
| ENSDARG0000000040300 | gtpbp10           | 42   | 105  | 1,24 | 4,31E-02 |
| ENSDARG00000101936   | tmem106ba         | 260  | 626  | 1,24 | 1,45E-03 |
| ENSDARG000000045955  | prlr1b            | 48   | 120  | 1,24 | 4,20E-02 |
| ENSDARG000000070266  | spock3            | 937  | 2332 | 1,24 | 4,99E-02 |
| ENSDARG000000053583  | cers6             | 471  | 1141 | 1,23 | 7,94E-03 |
| ENSDARG000000040123  | zfpm2a            | 98   | 237  | 1,23 | 1,44E-02 |
| ENSDARG0000000011605 | dennd6b           | 88   | 213  | 1,23 | 1,89E-02 |
| ENSDARG000000075491  | si:ch211-26b3.4   | 69   | 166  | 1,22 | 2,19E-02 |
| ENSDARG000000001889  | tuba1a            | 54   | 133  | 1,22 | 4,33E-02 |
| ENSDARG0000000098780 | nsmce1            | 31   | 75   | 1,22 | 3,08E-02 |
| ENSDARG000000011555  | spag7             | 83   | 197  | 1,22 | 2,83E-03 |
| ENSDARG000000046141  | zgc:162025        | 64   | 155  | 1,22 | 2,43E-02 |
| ENSDARG0000000019117 | parvb             | 71   | 170  | 1,22 | 7,94E-03 |
| ENSDARG000000094265  | si:dkey-183n20.15 | 50   | 122  | 1,21 | 2,91E-02 |

|                     |                   |      |      |      |          |
|---------------------|-------------------|------|------|------|----------|
| ENSDARG00000015472  | gpc4              | 560  | 1343 | 1,21 | 2,24E-02 |
| ENSDARG00000005651  | hrasb             | 59   | 141  | 1,21 | 4,03E-03 |
| ENSDARG00000000760  | znf511            | 44   | 105  | 1,20 | 2,11E-02 |
| ENSDARG00000057021  | vps36             | 63   | 147  | 1,20 | 6,52E-04 |
| ENSDARG00000058225  | arpc4l            | 263  | 619  | 1,20 | 4,02E-03 |
| ENSDARG00000020944  | ezra              | 79   | 190  | 1,20 | 2,81E-02 |
| ENSDARG00000090503  | oma1              | 17   | 41   | 1,20 | 2,61E-02 |
| ENSDARG000000101735 | chn1              | 42   | 102  | 1,20 | 4,20E-02 |
| ENSDARG00000033987  | rsrc1             | 30   | 72   | 1,20 | 4,01E-02 |
| ENSDARG00000031261  | sap30bp           | 190  | 453  | 1,20 | 2,33E-02 |
| ENSDARG00000091592  | pel1a             | 223  | 529  | 1,19 | 2,71E-02 |
| ENSDARG00000076532  | si:ch211-222l21.1 | 575  | 1352 | 1,18 | 1,87E-02 |
| ENSDARG00000012222  | nup35             | 54   | 126  | 1,18 | 5,34E-03 |
| ENSDARG00000104709  | sprtn             | 24   | 58   | 1,18 | 4,96E-02 |
| ENSDARG00000075564  | fam13a            | 395  | 924  | 1,18 | 1,73E-02 |
| ENSDARG00000041600  | wdr83             | 47   | 109  | 1,18 | 1,46E-02 |
| ENSDARG00000101996  | cxxc1a            | 88   | 205  | 1,18 | 9,91E-03 |
| ENSDARG00000028327  | gmfb              | 139  | 321  | 1,18 | 1,77E-03 |
| ENSDARG000000024818 | rilp12            | 91   | 211  | 1,17 | 1,40E-02 |
| ENSDARG00000095538  | senp3a            | 22   | 52   | 1,17 | 3,05E-02 |
| ENSDARG00000035398  | enc1              | 345  | 797  | 1,17 | 1,14E-02 |
| ENSDARG00000014085  | atp6v1e1a         | 88   | 203  | 1,17 | 8,69E-03 |
| ENSDARG00000089720  | CABZ01077218.1    | 59   | 136  | 1,17 | 1,87E-02 |
| ENSDARG00000028088  | galk1             | 70   | 161  | 1,17 | 1,38E-02 |
| ENSDARG00000014333  | ormdl1            | 225  | 519  | 1,17 | 1,32E-02 |
| ENSDARG00000017261  | gdpd1             | 193  | 445  | 1,16 | 1,54E-02 |
| ENSDARG00000099439  | serp1             | 690  | 1599 | 1,16 | 2,52E-02 |
| ENSDARG00000059483  | tead1b            | 281  | 647  | 1,16 | 1,56E-02 |
| ENSDARG00000002994  | itpkca            | 36   | 83   | 1,16 | 4,97E-02 |
| ENSDARG00000062056  | elmod1            | 127  | 292  | 1,16 | 1,38E-02 |
| ENSDARG000000075129 | mrps11            | 65   | 151  | 1,16 | 2,84E-02 |
| ENSDARG00000045482  | stk38l            | 108  | 248  | 1,16 | 1,13E-02 |
| ENSDARG00000041237  | med18             | 25   | 59   | 1,16 | 2,06E-02 |
| ENSDARG00000034885  | bet1              | 108  | 252  | 1,16 | 4,56E-02 |
| ENSDARG00000001303  | psmb8a            | 160  | 368  | 1,15 | 1,73E-02 |
| ENSDARG00000041155  | morf4l1           | 296  | 672  | 1,15 | 5,81E-03 |
| ENSDARG000000011661 | twf1b             | 92   | 207  | 1,15 | 2,04E-03 |
| ENSDARG00000036147  | ano5b             | 84   | 193  | 1,14 | 3,89E-02 |
| ENSDARG00000044760  | gnaia             | 232  | 524  | 1,14 | 6,15E-03 |
| ENSDARG00000099510  | cnn3a             | 459  | 1036 | 1,14 | 7,26E-03 |
| ENSDARG00000002339  | sgf29             | 53   | 122  | 1,14 | 4,15E-02 |
| ENSDARG00000099799  | si:dkey-11f4.16   | 69   | 158  | 1,14 | 4,70E-02 |
| ENSDARG00000070061  | gfer              | 63   | 145  | 1,14 | 4,27E-02 |
| ENSDARG00000010052  | ndrg3b            | 1285 | 2910 | 1,13 | 2,73E-02 |
| ENSDARG00000062489  | march8            | 990  | 2211 | 1,13 | 9,87E-03 |
| ENSDARG00000041071  | jagn1a            | 150  | 336  | 1,13 | 1,08E-02 |
| ENSDARG00000070833  | lin52             | 86   | 193  | 1,12 | 2,15E-02 |
| ENSDARG00000079584  | zgc:194930        | 231  | 509  | 1,12 | 8,17E-04 |
| ENSDARG00000045843  | apex1             | 47   | 105  | 1,12 | 1,72E-02 |
| ENSDARG0000004023   | isl1              | 2468 | 5493 | 1,12 | 1,20E-02 |
| ENSDARG0000007025   | ttc9c             | 19   | 44   | 1,12 | 4,16E-02 |
| ENSDARG00000027986  | slc35d1b          | 94   | 209  | 1,11 | 1,90E-02 |
| ENSDARG00000044923  | ube2w             | 249  | 550  | 1,11 | 1,54E-02 |
| ENSDARG00000101446  | PCP4L1            | 102  | 228  | 1,10 | 3,50E-02 |
| ENSDARG00000029252  | ssb               | 58   | 127  | 1,10 | 2,04E-02 |
| ENSDARG00000018529  | lipf              | 111  | 243  | 1,10 | 1,82E-02 |
| ENSDARG00000070986  | sergef            | 42   | 93   | 1,10 | 4,31E-02 |
| ENSDARG00000029107  | ube2d1a           | 62   | 137  | 1,10 | 4,51E-02 |
| ENSDARG00000101063  | CABZ01058650.1    | 78   | 173  | 1,10 | 3,32E-02 |
| ENSDARG00000059906  | sdca4             | 973  | 2144 | 1,10 | 3,02E-02 |
| ENSDARG00000030871  | siah1             | 109  | 239  | 1,09 | 1,75E-02 |
| ENSDARG00000092746  | si:ch211-150o23.2 | 105  | 229  | 1,09 | 1,92E-02 |
| ENSDARG00000020777  | cep85l            | 51   | 111  | 1,09 | 1,90E-02 |
| ENSDARG00000098646  | mthfd2            | 110  | 239  | 1,09 | 1,81E-02 |
| ENSDARG00000017874  | dnajc3b           | 141  | 305  | 1,09 | 7,27E-03 |
| ENSDARG00000054540  | imp4              | 31   | 69   | 1,08 | 4,29E-02 |
| ENSDARG00000011498  | si:ch211-212o1.2  | 152  | 327  | 1,08 | 1,30E-02 |
| ENSDARG00000044642  | sc5d              | 63   | 136  | 1,08 | 1,43E-02 |
| ENSDARG00000035146  | polr2j            | 57   | 125  | 1,08 | 2,91E-02 |
| ENSDARG00000079994  | AKAP13            | 583  | 1258 | 1,08 | 1,62E-02 |
| ENSDARG00000045540  | ppp6r2a           | 580  | 1242 | 1,07 | 7,47E-03 |
| ENSDARG00000021582  | dynlrb1           | 233  | 499  | 1,07 | 6,80E-03 |
| ENSDARG00000010280  | clasp1a           | 183  | 393  | 1,07 | 1,76E-02 |

|                     |                  |       |      |       |          |
|---------------------|------------------|-------|------|-------|----------|
| ENSDARG00000076919  | igdcc4           | 352   | 755  | 1,07  | 1,61E-02 |
| ENSDARG00000062476  | snapp5           | 112   | 242  | 1,07  | 4,25E-02 |
| ENSDARG00000104637  | fam219b          | 155   | 329  | 1,07  | 4,37E-03 |
| ENSDARG00000056396  | dusp22a          | 48    | 105  | 1,06  | 4,82E-02 |
| ENSDARG00000057884  | zgc:114174       | 54    | 117  | 1,06  | 2,74E-02 |
| ENSDARG00000011488  | sirt2            | 240   | 508  | 1,06  | 3,29E-03 |
| ENSDARG00000003531  | tcea1            | 174   | 372  | 1,06  | 1,14E-02 |
| ENSDARG000000002549 | eif3eb           | 77    | 164  | 1,06  | 3,24E-03 |
| ENSDARG00000028295  | mkrn4            | 73    | 155  | 1,05  | 3,37E-02 |
| ENSDARG00000102998  | taf6             | 147   | 310  | 1,05  | 6,56E-03 |
| ENSDARG00000006878  | phf21aa          | 188   | 397  | 1,05  | 1,01E-02 |
| ENSDARG00000104030  | taf12            | 481   | 1017 | 1,05  | 1,23E-02 |
| ENSDARG00000104894  | si:ch73-138e16.2 | 52    | 112  | 1,05  | 3,17E-02 |
| ENSDARG00000077804  | hgsnat           | 53    | 112  | 1,05  | 8,14E-03 |
| ENSDARG00000069085  | ints2            | 159   | 338  | 1,05  | 3,47E-02 |
| ENSDARG00000092467  | si:ch73-46j18.5  | 680   | 1452 | 1,05  | 4,95E-02 |
| ENSDARG00000070600  | DYRK3            | 335   | 709  | 1,05  | 2,08E-02 |
| ENSDARG00000099749  | ube2d2l          | 119   | 254  | 1,05  | 4,99E-02 |
| ENSDARG00000012866  | picalma          | 314   | 669  | 1,05  | 4,83E-02 |
| ENSDARG00000003749  | polb             | 85    | 180  | 1,04  | 2,38E-02 |
| ENSDARG00000033738  | zgc:153867       | 686   | 1432 | 1,04  | 4,84E-03 |
| ENSDARG00000077253  | alkbh6           | 40    | 85   | 1,04  | 4,30E-02 |
| ENSDARG00000053070  | gosr2            | 300   | 632  | 1,04  | 2,80E-02 |
| ENSDARG00000055912  | nipa2            | 151   | 321  | 1,04  | 4,35E-02 |
| ENSDARG000000093240 | GMEB2            | 230   | 485  | 1,04  | 4,60E-02 |
| ENSDARG00000037009  | banf1            | 155   | 326  | 1,03  | 2,12E-02 |
| ENSDARG00000006719  | specc1la         | 159   | 330  | 1,03  | 2,84E-03 |
| ENSDARG00000069910  | gtf2f2a          | 247   | 515  | 1,03  | 1,22E-02 |
| ENSDARG00000069494  | tmem223          | 28    | 59   | 1,03  | 4,33E-02 |
| ENSDARG00000078315  | zgc:110063       | 42    | 88   | 1,03  | 4,65E-02 |
| ENSDARG000000070553 | rnmt             | 117   | 244  | 1,03  | 1,44E-02 |
| ENSDARG00000040584  | eef1akmt1        | 71    | 149  | 1,03  | 4,34E-02 |
| ENSDARG00000019530  | hdgfl2           | 79    | 166  | 1,03  | 2,55E-02 |
| ENSDARG00000014462  | rab3c            | 146   | 302  | 1,03  | 7,16E-03 |
| ENSDARG00000054858  | tp53bp2b         | 105   | 218  | 1,02  | 1,45E-02 |
| ENSDARG00000020834  | si:dkey-230p4.1  | 84    | 175  | 1,02  | 3,08E-02 |
| ENSDARG000000063572 | perp             | 161   | 334  | 1,02  | 1,37E-02 |
| ENSDARG00000095086  | cfdp1            | 46    | 97   | 1,02  | 4,75E-02 |
| ENSDARG00000039136  | cox16            | 129   | 267  | 1,02  | 2,56E-02 |
| ENSDARG00000045025  | ift52            | 57    | 118  | 1,01  | 1,93E-02 |
| ENSDARG00000068246  | plcb3            | 754   | 1554 | 1,01  | 2,12E-02 |
| ENSDARG00000076689  | gramd1a          | 224   | 460  | 1,01  | 1,49E-02 |
| ENSDARG000000033140 | desi1a           | 190   | 395  | 1,01  | 4,78E-02 |
| ENSDARG00000011597  | atxn2l           | 435   | 212  | -1,00 | 3,69E-02 |
| ENSDARG00000045909  | dynlt1           | 370   | 180  | -1,00 | 2,28E-02 |
| ENSDARG00000059925  | usp24            | 493   | 242  | -1,00 | 7,59E-03 |
| ENSDARG00000016875  | gys1             | 395   | 193  | -1,01 | 2,08E-02 |
| ENSDARG00000115547  | CABZ01026681.1   | 207   | 101  | -1,01 | 9,05E-03 |
| ENSDARG00000006094  | igf2r            | 595   | 288  | -1,01 | 4,22E-02 |
| ENSDARG00000055530  | sertad2b         | 346   | 168  | -1,01 | 2,75E-02 |
| ENSDARG00000006019  | tktb             | 456   | 221  | -1,01 | 1,65E-02 |
| ENSDARG00000053136  | b2m              | 10309 | 5025 | -1,02 | 4,70E-03 |
| ENSDARG00000074903  | itcha            | 357   | 172  | -1,02 | 2,98E-02 |
| ENSDARG000000022712 | stat3            | 1051  | 506  | -1,02 | 2,68E-02 |
| ENSDARG00000033537  | p4ha1a           | 235   | 112  | -1,02 | 4,54E-02 |
| ENSDARG00000069013  | prdx4            | 4543  | 2185 | -1,02 | 2,52E-02 |
| ENSDARG00000040965  | zgc:101731       | 1056  | 509  | -1,02 | 1,81E-02 |
| ENSDARG00000068894  | nrip1b           | 873   | 424  | -1,02 | 3,29E-03 |
| ENSDARG00000032369  | btbd6b           | 648   | 309  | -1,02 | 4,76E-02 |
| ENSDARG00000036687  | bcl9             | 347   | 167  | -1,03 | 1,94E-02 |
| ENSDARG00000063457  | wash1            | 87    | 41   | -1,03 | 4,45E-02 |
| ENSDARG00000100717  | socs5a           | 119   | 57   | -1,03 | 4,78E-02 |
| ENSDARG00000100222  | utrn             | 418   | 200  | -1,03 | 3,43E-02 |
| ENSDARG00000018997  | cplx2l           | 1890  | 910  | -1,03 | 1,32E-02 |
| ENSDARG00000074229  | prr12a           | 1272  | 607  | -1,03 | 3,59E-02 |
| ENSDARG000000062744 | scn1lab          | 625   | 300  | -1,03 | 2,09E-02 |
| ENSDARG00000104435  | si:ch73-217b7.1  | 372   | 178  | -1,03 | 2,40E-02 |
| ENSDARG00000075819  | arhgef2          | 225   | 108  | -1,03 | 1,59E-02 |
| ENSDARG00000054930  | tpa1             | 239   | 114  | -1,03 | 1,55E-02 |
| ENSDARG00000007727  | rgl2             | 445   | 211  | -1,03 | 3,91E-02 |
| ENSDARG00000019702  | aldocb           | 9526  | 4515 | -1,03 | 4,45E-02 |
| ENSDARG00000056156  | npdc1b           | 459   | 218  | -1,03 | 3,03E-02 |
| ENSDARG00000068981  | glceb            | 343   | 164  | -1,04 | 1,03E-02 |

|                     |                   |       |      |       |          |
|---------------------|-------------------|-------|------|-------|----------|
| ENSDARG00000086678  | ascc3             | 723   | 345  | -1,04 | 1,05E-02 |
| ENSDARG00000074696  | zgc:194621        | 350   | 167  | -1,04 | 1,19E-02 |
| ENSDARG00000003789  | dennd5b           | 304   | 145  | -1,04 | 9,77E-03 |
| ENSDARG00000056092  | si:dkey-12h9.6    | 213   | 101  | -1,04 | 4,74E-02 |
| ENSDARG00000078222  | aatka             | 932   | 445  | -1,05 | 6,27E-03 |
| ENSDARG00000062055  | rnf38             | 366   | 172  | -1,05 | 3,64E-02 |
| ENSDARG00000076618  | tm2d3             | 240   | 112  | -1,05 | 4,35E-02 |
| ENSDARG000000010437 | fam46c            | 3541  | 1682 | -1,05 | 9,11E-03 |
| ENSDARG00000039319  | vps37b            | 202   | 95   | -1,05 | 1,06E-02 |
| ENSDARG00000035285  | ncor1             | 3094  | 1473 | -1,05 | 3,73E-03 |
| ENSDARG00000005867  | gon4l             | 395   | 187  | -1,05 | 7,57E-03 |
| ENSDARG00000077901  | herc1             | 637   | 301  | -1,05 | 1,18E-02 |
| ENSDARG000000062477 | kiaa1549la        | 1066  | 500  | -1,06 | 2,38E-02 |
| ENSDARG00000075281  | tbc1d30           | 606   | 284  | -1,06 | 1,92E-02 |
| ENSDARG00000062531  | mapk8ip3          | 744   | 353  | -1,06 | 2,95E-03 |
| ENSDARG00000042551  | mboat2b           | 446   | 210  | -1,06 | 4,30E-03 |
| ENSDARG00000055052  | map2              | 1492  | 703  | -1,06 | 3,55E-03 |
| ENSDARG00000076796  | dlg3              | 185   | 87   | -1,06 | 1,15E-02 |
| ENSDARG000000056331 | ahcyl1            | 619   | 292  | -1,07 | 1,10E-03 |
| ENSDARG00000078014  | pacsin2           | 161   | 75   | -1,07 | 3,56E-02 |
| ENSDARG00000069433  | tnk1              | 266   | 123  | -1,07 | 3,66E-02 |
| ENSDARG00000044056  | ahi1              | 299   | 140  | -1,07 | 1,20E-02 |
| ENSDARG00000018967  | gabbr1a           | 426   | 197  | -1,07 | 3,55E-02 |
| ENSDARG00000042627  | nhs1b             | 476   | 221  | -1,07 | 1,71E-02 |
| ENSDARG000000062956 | dagla             | 368   | 172  | -1,07 | 3,94E-03 |
| ENSDARG00000100374  | txnrd3            | 1249  | 581  | -1,08 | 9,88E-03 |
| ENSDARG00000014571  | ctnnb1            | 8682  | 4046 | -1,08 | 5,60E-03 |
| ENSDARG00000077095  | si:ch211-160o17.4 | 1514  | 705  | -1,08 | 5,95E-03 |
| ENSDARG00000004763  | hhla2a.2          | 560   | 261  | -1,08 | 2,68E-03 |
| ENSDARG00000098825  | farsa             | 177   | 81   | -1,08 | 4,38E-02 |
| ENSDARG000000101047 | rtcb              | 144   | 66   | -1,08 | 4,95E-02 |
| ENSDARG00000024694  | myo1b             | 413   | 191  | -1,08 | 2,39E-02 |
| ENSDARG00000055377  | gnb5b             | 216   | 99   | -1,08 | 4,21E-02 |
| ENSDARG000000024874 | dock4b            | 679   | 316  | -1,08 | 4,15E-03 |
| ENSDARG00000005652  | man1a1            | 312   | 143  | -1,09 | 2,09E-02 |
| ENSDARG00000032197  | klf12b            | 317   | 146  | -1,09 | 1,94E-02 |
| ENSDARG000000013704 | cers2a            | 1135  | 518  | -1,09 | 2,10E-02 |
| ENSDARG00000099547  | nbeal1            | 325   | 146  | -1,09 | 4,96E-02 |
| ENSDARG00000011819  | pcnx              | 438   | 199  | -1,10 | 2,44E-02 |
| ENSDARG00000043474  | atp2b3a           | 787   | 360  | -1,10 | 3,77E-03 |
| ENSDARG00000058237  | ssbp3a            | 640   | 292  | -1,10 | 1,29E-02 |
| ENSDARG00000000966  | ncor2             | 4415  | 1993 | -1,11 | 2,58E-02 |
| ENSDARG000000078954 | rxrba             | 169   | 76   | -1,11 | 4,28E-02 |
| ENSDARG00000086183  | vkorc1            | 561   | 254  | -1,11 | 1,06E-02 |
| ENSDARG00000063253  | hecw2b            | 77    | 34   | -1,11 | 2,93E-02 |
| ENSDARG00000036235  | zbtb3             | 186   | 83   | -1,11 | 2,99E-02 |
| ENSDARG00000041572  | zfpml             | 229   | 102  | -1,12 | 3,36E-02 |
| ENSDARG00000018961  | gtpbp4            | 2162  | 961  | -1,12 | 3,52E-02 |
| ENSDARG00000040334  | mat2aa            | 1132  | 504  | -1,12 | 2,97E-02 |
| ENSDARG00000069763  | etv5a             | 670   | 299  | -1,12 | 1,73E-02 |
| ENSDARG00000012788  | foxa3             | 1953  | 861  | -1,12 | 4,88E-02 |
| ENSDARG00000077499  | plekho1b          | 229   | 103  | -1,12 | 1,16E-02 |
| ENSDARG00000035264  | riok2             | 266   | 117  | -1,13 | 3,63E-02 |
| ENSDARG00000076058  | gba               | 551   | 248  | -1,13 | 3,96E-03 |
| ENSDARG00000055543  | appb              | 1854  | 825  | -1,13 | 1,64E-02 |
| ENSDARG00000099256  | pum1              | 785   | 351  | -1,13 | 8,58E-03 |
| ENSDARG00000104450  | CR85596.2         | 1042  | 465  | -1,13 | 1,03E-02 |
| ENSDARG00000078348  | tcf20             | 1290  | 577  | -1,13 | 6,48E-03 |
| ENSDARG00000013847  | egfra             | 228   | 101  | -1,13 | 2,11E-02 |
| ENSDARG000000004246 | slit2             | 405   | 178  | -1,13 | 4,73E-02 |
| ENSDARG00000060494  | eprs              | 1100  | 491  | -1,13 | 5,43E-03 |
| ENSDARG00000099747  | CABZ01111953.1    | 120   | 53   | -1,13 | 2,41E-02 |
| ENSDARG00000053405  | sord              | 149   | 66   | -1,14 | 2,44E-02 |
| ENSDARG00000016132  | keap1a            | 239   | 106  | -1,14 | 2,15E-02 |
| ENSDARG00000023600  | sh3gl2a           | 1079  | 475  | -1,14 | 2,00E-02 |
| ENSDARG00000105503  | fnkc3a            | 1889  | 824  | -1,14 | 3,72E-02 |
| ENSDARG00000035471  | si:dkey-220k22.1  | 511   | 227  | -1,14 | 3,23E-03 |
| ENSDARG00000060123  | ca16b             | 512   | 224  | -1,14 | 3,14E-02 |
| ENSDARG00000079326  | cabin1            | 329   | 143  | -1,15 | 4,11E-02 |
| ENSDARG00000058732  | scgn              | 14591 | 6441 | -1,15 | 8,02E-03 |
| ENSDARG00000076170  | pcsk1nl           | 12228 | 5432 | -1,15 | 1,78E-03 |
| ENSDARG00000005774  | ddx3b             | 702   | 307  | -1,15 | 1,98E-02 |
| ENSDARG00000060484  | selenoi           | 132   | 57   | -1,15 | 4,79E-02 |

|                     |                    |       |       |       |          |
|---------------------|--------------------|-------|-------|-------|----------|
| ENSDARG00000063101  | man2a2             | 1211  | 536   | -1,15 | 2,73E-03 |
| ENSDARG00000000568  | ell                | 417   | 184   | -1,15 | 2,32E-03 |
| ENSDARG00000086288  | scg3               | 46790 | 20777 | -1,15 | 6,01E-04 |
| ENSDARG00000102128  | eps8               | 226   | 98    | -1,15 | 3,78E-02 |
| ENSDARG00000105255  | zbtb4              | 4803  | 2109  | -1,16 | 5,75E-03 |
| ENSDARG00000009031  | tnikb              | 259   | 113   | -1,16 | 9,41E-03 |
| ENSDARG00000030161  | ppp1r14bb          | 383   | 165   | -1,16 | 1,83E-02 |
| ENSDARG000000056050 | kctd17             | 135   | 59    | -1,17 | 4,26E-03 |
| ENSDARG00000059939  | dab1a              | 519   | 223   | -1,17 | 2,75E-02 |
| ENSDARG00000104130  | rbm26              | 224   | 96    | -1,17 | 2,27E-02 |
| ENSDARG00000000019  | ube2h              | 1013  | 439   | -1,17 | 6,28E-03 |
| ENSDARG00000071215  | palm3              | 176   | 75    | -1,18 | 1,66E-02 |
| ENSDARG000000008829 | chga               | 2236  | 945   | -1,18 | 4,33E-02 |
| ENSDARG00000074905  | camk1da            | 2361  | 1006  | -1,18 | 2,53E-02 |
| ENSDARG00000112923  | CABZ01088036.1     | 152   | 65    | -1,18 | 3,48E-02 |
| ENSDARG00000011170  | ndrg2              | 691   | 295   | -1,18 | 2,57E-02 |
| ENSDARG00000013500  | abca2              | 825   | 350   | -1,18 | 3,29E-02 |
| ENSDARG00000037018  | gab1               | 978   | 425   | -1,18 | 5,42E-04 |
| ENSDARG000000003751 | lats1              | 368   | 158   | -1,18 | 7,22E-03 |
| ENSDARG00000063219  | ubap2l             | 1210  | 522   | -1,18 | 2,48E-03 |
| ENSDARG00000075230  | tet1               | 321   | 135   | -1,19 | 3,47E-02 |
| ENSDARG00000060480  | ubr1               | 154   | 64    | -1,19 | 4,67E-02 |
| ENSDARG00000052331  | abcf2b             | 412   | 177   | -1,19 | 1,43E-03 |
| ENSDARG00000069360  | ppp3r1b            | 1136  | 489   | -1,19 | 6,20E-04 |
| ENSDARG000000002037 | pfkfb2b            | 320   | 137   | -1,20 | 6,95E-03 |
| ENSDARG00000068006  | gck                | 7069  | 2990  | -1,20 | 1,19E-02 |
| ENSDARG00000069185  | celsr1a            | 566   | 241   | -1,20 | 4,75E-03 |
| ENSDARG00000025269  | pdcd6ip            | 2062  | 878   | -1,20 | 3,53E-03 |
| ENSDARG00000016830  | rimk1a             | 389   | 164   | -1,20 | 1,62E-02 |
| ENSDARG00000035187  | abl1               | 213   | 89    | -1,20 | 4,18E-02 |
| ENSDARG000000020123 | coq8a              | 550   | 233   | -1,20 | 7,37E-03 |
| ENSDARG00000003169  | magi1b             | 514   | 218   | -1,20 | 4,29E-03 |
| ENSDARG00000054128  | im:7136021         | 163   | 68    | -1,21 | 2,90E-02 |
| ENSDARG00000021647  | gnai1              | 1327  | 563   | -1,21 | 2,32E-03 |
| ENSDARG00000100708  | jakmip3            | 85    | 35    | -1,21 | 4,78E-02 |
| ENSDARG00000055429  | kat6b              | 725   | 305   | -1,21 | 7,51E-03 |
| ENSDARG00000103658  | hivep1             | 646   | 265   | -1,22 | 3,89E-02 |
| ENSDARG00000103288  | PDPR               | 201   | 83    | -1,22 | 1,55E-02 |
| ENSDARG00000077188  | atrnl1a            | 137   | 57    | -1,22 | 2,52E-02 |
| ENSDARG00000004386  | si:dkey-153k10.9   | 2837  | 1179  | -1,22 | 9,36E-03 |
| ENSDARG00000017835  | brf1a              | 98    | 40    | -1,22 | 4,25E-02 |
| ENSDARG00000070961  | lepr               | 2930  | 1200  | -1,23 | 2,79E-02 |
| ENSDARG000000055787 | dzank1             | 65    | 27    | -1,23 | 4,91E-02 |
| ENSDARG00000100524  | abca3b             | 1442  | 603   | -1,23 | 2,56E-03 |
| ENSDARG00000035808  | clcn4              | 304   | 126   | -1,23 | 9,14E-03 |
| ENSDARG00000073944  | si:ch73-386h18.1   | 826   | 340   | -1,23 | 1,33E-02 |
| ENSDARG00000062177  | dcbl2              | 743   | 303   | -1,23 | 2,65E-02 |
| ENSDARG000000077650 | tnksa              | 1008  | 415   | -1,23 | 1,28E-02 |
| ENSDARG00000019588  | chico              | 512   | 207   | -1,23 | 3,97E-02 |
| ENSDARG00000079872  | rapgef4            | 3418  | 1376  | -1,24 | 4,66E-02 |
| ENSDARG00000059809  | caska              | 166   | 67    | -1,24 | 4,99E-02 |
| ENSDARG00000014101  | pyroxd2            | 394   | 163   | -1,24 | 6,15E-03 |
| ENSDARG00000076943  | lhfp14b            | 250   | 101   | -1,24 | 3,47E-02 |
| ENSDARG000000001710 | flot1b             | 1610  | 664   | -1,24 | 6,73E-03 |
| ENSDARG00000069970  | lingo2b            | 478   | 197   | -1,24 | 1,01E-02 |
| ENSDARG00000032083  | dpysl2b            | 564   | 233   | -1,24 | 4,86E-03 |
| ENSDARG00000079891  | dnajc6             | 723   | 297   | -1,25 | 5,10E-03 |
| ENSDARG00000061654  | wwc3               | 87    | 35    | -1,25 | 3,33E-02 |
| ENSDARG00000062220  | plekha7b           | 131   | 53    | -1,25 | 2,54E-02 |
| ENSDARG00000101949  | numbl              | 228   | 93    | -1,25 | 6,27E-03 |
| ENSDARG00000074702  | arfgef2            | 483   | 196   | -1,25 | 8,76E-03 |
| ENSDARG00000100227  | SLC7A1 (1 of many) | 166   | 66    | -1,26 | 2,16E-02 |
| ENSDARG00000101858  | DST                | 391   | 159   | -1,26 | 8,45E-03 |
| ENSDARG00000102730  | mapk10             | 556   | 224   | -1,26 | 8,13E-03 |
| ENSDARG00000017880  | kcnip3b            | 615   | 248   | -1,27 | 1,05E-02 |
| ENSDARG000000004954 | grna               | 2953  | 1181  | -1,27 | 1,35E-02 |
| ENSDARG00000014891  | robo2              | 1701  | 678   | -1,27 | 1,74E-02 |
| ENSDARG00000077536  | snrnp200           | 1547  | 617   | -1,27 | 1,25E-02 |
| ENSDARG00000101986  | irf6               | 328   | 131   | -1,27 | 1,98E-02 |
| ENSDARG00000043643  | ehbp1              | 1049  | 424   | -1,27 | 2,05E-03 |
| ENSDARG00000103792  | CABZ01076737.1     | 143   | 56    | -1,27 | 3,83E-02 |
| ENSDARG00000113609  | TMEM164            | 184   | 72    | -1,27 | 4,78E-02 |
| ENSDARG00000061732  | raph1b             | 424   | 168   | -1,28 | 1,43E-02 |

|                     |                  |      |      |       |          |
|---------------------|------------------|------|------|-------|----------|
| ENSDARG00000008287  | fam114a1         | 416  | 165  | -1,28 | 8,84E-03 |
| ENSDARG00000006892  | myo3b            | 391  | 155  | -1,29 | 9,76E-03 |
| ENSDARG00000058207  | abi2a            | 580  | 232  | -1,29 | 2,02E-03 |
| ENSDARG00000041702  | rfx6             | 2696 | 1064 | -1,29 | 1,05E-02 |
| ENSDARG00000076005  | piezo2a.2        | 185  | 73   | -1,29 | 1,13E-02 |
| ENSDARG00000003008  | prkcea           | 1997 | 792  | -1,29 | 5,40E-03 |
| ENSDARG00000062008  | hs2st1b          | 637  | 252  | -1,29 | 4,98E-03 |
| ENSDARG000000104094 | grk3             | 175  | 68   | -1,30 | 2,82E-02 |
| ENSDARG00000002916  | sec31b           | 308  | 119  | -1,30 | 2,18E-02 |
| ENSDARG00000063007  | apc2             | 666  | 259  | -1,30 | 1,36E-02 |
| ENSDARG00000068217  | stx2b            | 666  | 259  | -1,31 | 1,11E-02 |
| ENSDARG00000087018  | FO704748.1       | 91   | 35   | -1,31 | 3,43E-02 |
| ENSDARG000000062909 | furina           | 7202 | 2777 | -1,31 | 1,83E-02 |
| ENSDARG00000091293  | dmxl2            | 1568 | 608  | -1,31 | 9,40E-03 |
| ENSDARG00000060849  | dlgap4a          | 255  | 98   | -1,32 | 1,24E-02 |
| ENSDARG00000078311  | dcaf6            | 160  | 61   | -1,32 | 4,28E-02 |
| ENSDARG00000021242  | mvp              | 1130 | 430  | -1,32 | 2,02E-02 |
| ENSDARG00000098954  | stard13b         | 185  | 71   | -1,32 | 1,37E-02 |
| ENSDARG000000031587 | flvcr1           | 1353 | 526  | -1,33 | 2,23E-03 |
| ENSDARG00000101813  | nap1l1           | 1723 | 668  | -1,33 | 1,64E-03 |
| ENSDARG00000011855  | aak1a            | 439  | 163  | -1,33 | 4,83E-02 |
| ENSDARG00000104225  | ndel1b           | 474  | 183  | -1,34 | 2,26E-03 |
| ENSDARG00000007918  | ttc27            | 185  | 70   | -1,34 | 1,57E-02 |
| ENSDARG00000060504  | pfkla            | 57   | 21   | -1,34 | 3,34E-02 |
| ENSDARG000000052658 | pptc7b           | 176  | 66   | -1,34 | 2,52E-02 |
| ENSDARG00000034443  | mpped2           | 650  | 247  | -1,34 | 7,80E-03 |
| ENSDARG00000055054  | bcl9l            | 200  | 76   | -1,34 | 1,06E-02 |
| ENSDARG00000068421  | ttc9b            | 77   | 29   | -1,34 | 3,64E-02 |
| ENSDARG00000098822  | tcerg1a          | 98   | 37   | -1,34 | 1,21E-02 |
| ENSDARG00000020845  | tns1b            | 1300 | 482  | -1,35 | 3,35E-02 |
| ENSDARG000000086990 | carmil3          | 731  | 275  | -1,35 | 1,51E-02 |
| ENSDARG00000028793  | nlk2             | 511  | 194  | -1,35 | 7,48E-03 |
| ENSDARG00000036442  | atp11c           | 332  | 128  | -1,35 | 2,39E-03 |
| ENSDARG00000002131  | celf2            | 244  | 91   | -1,35 | 2,25E-02 |
| ENSDARG00000012823  | dlgap4b          | 213  | 78   | -1,35 | 4,88E-02 |
| ENSDARG00000095912  | si:dkey-229b18.3 | 337  | 129  | -1,35 | 7,05E-04 |
| ENSDARG000000029955 | glb1l            | 159  | 60   | -1,35 | 1,30E-02 |
| ENSDARG00000004871  | mst1rb           | 1867 | 696  | -1,35 | 1,69E-02 |
| ENSDARG00000107385  | aars2            | 179  | 67   | -1,35 | 8,07E-03 |
| ENSDARG00000057032  | ppm1nb           | 197  | 72   | -1,36 | 2,17E-02 |
| ENSDARG00000006923  | cacna1ab         | 363  | 132  | -1,36 | 3,90E-02 |
| ENSDARG00000001803  | kcnh6a           | 1251 | 472  | -1,36 | 2,98E-03 |
| ENSDARG00000115805  | GGT7             | 742  | 273  | -1,37 | 2,01E-02 |
| ENSDARG00000053279  | apln             | 731  | 272  | -1,37 | 7,94E-03 |
| ENSDARG00000037320  | fam131c          | 156  | 57   | -1,37 | 3,57E-02 |
| ENSDARG00000098108  | dusp2            | 7513 | 2738 | -1,37 | 2,60E-02 |
| ENSDARG00000103428  | ogdhhb           | 142  | 51   | -1,37 | 4,92E-02 |
| ENSDARG00000101270  | klhl8            | 190  | 70   | -1,37 | 1,64E-02 |
| ENSDARG00000056642  | hdac9b           | 1884 | 703  | -1,37 | 3,88E-03 |
| ENSDARG00000004592  | gpr22a           | 1345 | 486  | -1,38 | 2,79E-02 |
| ENSDARG00000060257  | zranb1a          | 504  | 189  | -1,38 | 6,95E-04 |
| ENSDARG00000100456  | ptk2aa           | 162  | 59   | -1,38 | 2,55E-02 |
| ENSDARG00000034714  | esyt1a           | 713  | 259  | -1,38 | 2,12E-02 |
| ENSDARG000000089009 | frmpd1b          | 175  | 62   | -1,38 | 3,14E-02 |
| ENSDARG00000098375  | polr1a           | 765  | 283  | -1,39 | 2,88E-03 |
| ENSDARG00000062479  | vcam1b           | 333  | 119  | -1,39 | 3,17E-02 |
| ENSDARG00000104306  | LO018474.1       | 430  | 159  | -1,40 | 1,20E-03 |
| ENSDARG00000099425  | CABZ01073265.1   | 3934 | 1400 | -1,40 | 2,64E-02 |
| ENSDARG00000021833  | ahr2             | 2437 | 904  | -1,40 | 6,16E-04 |
| ENSDARG00000104676  | prkd2            | 461  | 170  | -1,40 | 1,76E-03 |
| ENSDARG00000061282  | glg1a            | 1704 | 617  | -1,40 | 1,05E-02 |
| ENSDARG00000075110  | dab2ipb          | 1180 | 430  | -1,40 | 5,94E-03 |
| ENSDARG00000062082  | hipk3b           | 1080 | 396  | -1,40 | 2,60E-03 |
| ENSDARG00000079616  | cramp1           | 309  | 111  | -1,40 | 1,25E-02 |
| ENSDARG00000069440  | dachd            | 295  | 106  | -1,40 | 1,56E-02 |
| ENSDARG00000098526  | gpr75            | 221  | 79   | -1,40 | 1,55E-02 |
| ENSDARG00000042833  | rffl             | 260  | 94   | -1,40 | 9,28E-03 |
| ENSDARG00000104014  | mark1            | 85   | 30   | -1,40 | 2,39E-02 |
| ENSDARG00000013063  | oxct1a           | 186  | 65   | -1,41 | 4,93E-02 |
| ENSDARG00000039486  | bag3             | 466  | 163  | -1,41 | 4,01E-02 |
| ENSDARG00000074481  | ulk1b            | 1244 | 448  | -1,41 | 9,91E-03 |
| ENSDARG00000060070  | adcyl7           | 568  | 207  | -1,41 | 2,44E-03 |
| ENSDARG00000037593  | prickle2b        | 1070 | 388  | -1,41 | 4,28E-03 |

|                     |                 |      |      |       |          |
|---------------------|-----------------|------|------|-------|----------|
| ENSDARG00000063332  | shank3a         | 311  | 109  | -1,41 | 2,70E-02 |
| ENSDARG00000088789  | mast1b          | 1220 | 432  | -1,41 | 1,81E-02 |
| ENSDARG00000074469  | amigo3          | 439  | 154  | -1,41 | 2,85E-02 |
| ENSDARG00000018206  | nck2a           | 76   | 26   | -1,41 | 4,71E-02 |
| ENSDARG00000044436  | rps6ka4         | 83   | 30   | -1,41 | 3,03E-02 |
| ENSDARG00000068143  | slc39a6         | 770  | 278  | -1,41 | 4,26E-03 |
| ENSDARG00000058421  | lgi1b           | 194  | 68   | -1,42 | 2,61E-02 |
| ENSDARG00000062485  | dock11          | 379  | 136  | -1,42 | 6,07E-03 |
| ENSDARG00000021539  | ephb2b          | 545  | 196  | -1,42 | 5,16E-03 |
| ENSDARG00000007774  | vash2           | 213  | 76   | -1,42 | 6,78E-03 |
| ENSDARG00000002968  | a1cf            | 3613 | 1318 | -1,42 | 4,14E-04 |
| ENSDARG00000101478  | plppr2a         | 118  | 41   | -1,42 | 3,80E-02 |
| ENSDARG000000020718 | slc25a22a       | 652  | 230  | -1,43 | 1,26E-02 |
| ENSDARG00000029668  | crim1           | 759  | 268  | -1,43 | 1,02E-02 |
| ENSDARG00000045006  | ptprga          | 1117 | 403  | -1,43 | 1,15E-03 |
| ENSDARG00000101280  | vat1l           | 226  | 80   | -1,43 | 9,71E-03 |
| ENSDARG00000100624  | CABZ01066312.1  | 193  | 67   | -1,43 | 1,55E-02 |
| ENSDARG00000073741  | RAP1GDS1        | 235  | 82   | -1,44 | 1,82E-02 |
| ENSDARG00000077608  | gpr137bb        | 1263 | 442  | -1,44 | 1,22E-02 |
| ENSDARG00000054874  | gpsm1b          | 108  | 37   | -1,44 | 4,50E-02 |
| ENSDARG00000063570  | dyrk1aa         | 480  | 164  | -1,44 | 3,49E-02 |
| ENSDARG00000102380  | cnnm4a          | 103  | 35   | -1,44 | 4,53E-02 |
| ENSDARG00000037121  | mat2ab          | 218  | 76   | -1,44 | 1,99E-02 |
| ENSDARG00000006983  | celf3b          | 339  | 119  | -1,44 | 9,41E-03 |
| ENSDARG000000024827 | rnf150a         | 157  | 53   | -1,45 | 4,30E-02 |
| ENSDARG00000009607  | ccnc            | 1049 | 369  | -1,45 | 3,79E-03 |
| ENSDARG00000044954  | slit1a          | 533  | 184  | -1,45 | 1,64E-02 |
| ENSDARG00000011545  | arrb2b          | 556  | 198  | -1,45 | 4,19E-04 |
| ENSDARG00000067916  | lyn             | 221  | 77   | -1,45 | 8,93E-03 |
| ENSDARG00000020235  | sept9a          | 974  | 346  | -1,45 | 6,63E-04 |
| ENSDARG000000079291 | rapgef3         | 127  | 42   | -1,45 | 4,30E-02 |
| ENSDARG00000038754  | plk3            | 794  | 272  | -1,46 | 1,65E-02 |
| ENSDARG00000078026  | zcchc24         | 104  | 34   | -1,46 | 3,50E-02 |
| ENSDARG00000099555  | foxo1a          | 3833 | 1317 | -1,46 | 1,05E-02 |
| ENSDARG00000028322  | pex14           | 782  | 277  | -1,46 | 3,63E-04 |
| ENSDARG00000114503  | phtf2           | 103  | 34   | -1,46 | 4,95E-02 |
| ENSDARG000000061862 | myo18ab         | 467  | 159  | -1,46 | 1,44E-02 |
| ENSDARG00000099221  | ppp2r2bb        | 273  | 93   | -1,46 | 1,41E-02 |
| ENSDARG00000023448  | galnt14         | 240  | 82   | -1,46 | 2,28E-02 |
| ENSDARG00000060841  | piik3c2a        | 862  | 307  | -1,47 | 9,50E-05 |
| ENSDARG00000077710  | nlgn1           | 261  | 89   | -1,47 | 1,48E-02 |
| ENSDARG00000076974  | pdzd7a          | 114  | 37   | -1,47 | 4,53E-02 |
| ENSDARG00000071377  | hsd11b1la       | 163  | 56   | -1,47 | 7,23E-03 |
| ENSDARG00000031075  | cadm1a          | 210  | 70   | -1,47 | 3,42E-02 |
| ENSDARG00000099483  | vdra            | 78   | 26   | -1,47 | 4,06E-02 |
| ENSDARG00000011533  | sema6dl         | 195  | 67   | -1,48 | 7,38E-03 |
| ENSDARG00000060862  | atxn1b          | 678  | 237  | -1,48 | 5,99E-04 |
| ENSDARG000000013415 | lmna            | 964  | 327  | -1,48 | 9,09E-03 |
| ENSDARG00000035132  | rgs3b           | 348  | 118  | -1,48 | 9,13E-03 |
| ENSDARG00000102975  | nsg2            | 3035 | 1028 | -1,48 | 1,09E-02 |
| ENSDARG00000075733  | zyx             | 136  | 46   | -1,48 | 7,65E-03 |
| ENSDARG00000030933  | ksr1b           | 700  | 232  | -1,48 | 2,15E-02 |
| ENSDARG00000098666  | si:dkey-93h22.8 | 105  | 36   | -1,49 | 7,51E-03 |
| ENSDARG00000079926  | syt15           | 122  | 40   | -1,49 | 2,23E-02 |
| ENSDARG00000086172  | ACVR1C          | 1152 | 393  | -1,49 | 3,56E-03 |
| ENSDARG00000061635  | myo5aa          | 522  | 180  | -1,49 | 1,11E-03 |
| ENSDARG00000004754  | hspace4a        | 415  | 139  | -1,49 | 1,04E-02 |
| ENSDARG00000051989  | tmem187         | 78   | 26   | -1,49 | 3,92E-02 |
| ENSDARG00000036107  | txnipa          | 2767 | 893  | -1,49 | 3,55E-02 |
| ENSDARG000000028000 | pfkpa           | 683  | 232  | -1,49 | 3,06E-03 |
| ENSDARG00000019743  | dctn1a          | 216  | 69   | -1,49 | 4,51E-02 |
| ENSDARG00000040177  | rgs16           | 638  | 212  | -1,49 | 1,50E-02 |
| ENSDARG00000058603  | jph1a           | 141  | 46   | -1,50 | 3,10E-02 |
| ENSDARG00000042010  | pklr            | 1073 | 356  | -1,50 | 1,03E-02 |
| ENSDARG00000005343  | ccdc85al        | 163  | 52   | -1,50 | 4,06E-02 |
| ENSDARG000000031768 | rora            | 465  | 152  | -1,51 | 1,99E-02 |
| ENSDARG00000116751  | BX537263.4      | 239  | 3    | -1,51 | 3,92E-02 |
| ENSDARG00000021059  | alas1           | 815  | 272  | -1,51 | 5,49E-03 |
| ENSDARG00000103962  | add1            | 641  | 215  | -1,51 | 3,50E-03 |
| ENSDARG00000032049  | enah            | 258  | 86   | -1,51 | 4,88E-03 |
| ENSDARG00000055565  | cacnb2b         | 172  | 55   | -1,51 | 3,51E-02 |
| ENSDARG000000063310 | oxr1b           | 638  | 204  | -1,51 | 4,08E-02 |
| ENSDARG00000103158  | ldb1b           | 402  | 128  | -1,52 | 3,59E-02 |

|                      |                   |       |      |       |          |
|----------------------|-------------------|-------|------|-------|----------|
| ENSDARG00000015053   | grip1             | 98    | 31   | -1,52 | 4,82E-02 |
| ENSDARG000000061203  | trpc1             | 415   | 134  | -1,52 | 2,50E-02 |
| ENSDARG000000054323  | pparab            | 68    | 22   | -1,52 | 3,13E-02 |
| ENSDARG000000070230  | aldh1l2           | 113   | 36   | -1,52 | 1,90E-02 |
| ENSDARG000000020853  | galr2a            | 695   | 229  | -1,53 | 6,48E-03 |
| ENSDARG000000063539  | slc25a15a         | 129   | 40   | -1,53 | 3,71E-02 |
| ENSDARG000000018270  | olfm1a            | 128   | 41   | -1,53 | 2,89E-02 |
| ENSDARG0000000059900 | tbc1d9            | 291   | 95   | -1,54 | 7,16E-03 |
| ENSDARG000000010181  | asap2a            | 158   | 49   | -1,54 | 4,28E-02 |
| ENSDARG000000031200  | ppp2r5cb          | 1868  | 621  | -1,54 | 6,53E-04 |
| ENSDARG000000078865  | cxxc5a            | 345   | 113  | -1,54 | 2,42E-03 |
| ENSDARG000000003449  | pde10a            | 474   | 154  | -1,55 | 5,62E-03 |
| ENSDARG0000000058606 | sik1              | 12091 | 3896 | -1,55 | 7,81E-03 |
| ENSDARG000000061335  | galnt1            | 641   | 214  | -1,55 | 2,23E-04 |
| ENSDARG000000029472  | afdna             | 574   | 187  | -1,55 | 2,78E-03 |
| ENSDARG000000079889  | phldb2a           | 119   | 37   | -1,55 | 2,65E-02 |
| ENSDARG000000003142  | dachc             | 499   | 156  | -1,56 | 2,09E-02 |
| ENSDARG000000063594  | hipk1a            | 317   | 101  | -1,56 | 8,39E-03 |
| ENSDARG0000000015824 | lemd3             | 218   | 71   | -1,56 | 2,54E-03 |
| ENSDARG000000010002  | gna11a            | 183   | 58   | -1,56 | 7,58E-03 |
| ENSDARG000000103413  | zgc:109949        | 832   | 256  | -1,56 | 3,08E-02 |
| ENSDARG0000000055999 | BRD8              | 102   | 32   | -1,57 | 2,09E-02 |
| ENSDARG000000015915  | slc25a36b         | 2318  | 752  | -1,57 | 1,17E-03 |
| ENSDARG000000053311  | tespa1            | 254   | 82   | -1,57 | 8,69E-04 |
| ENSDARG0000000058969 | cntnap2a          | 1173  | 359  | -1,57 | 2,49E-02 |
| ENSDARG000000101687  | CU929259.1        | 515   | 162  | -1,58 | 7,96E-03 |
| ENSDARG000000021846  | hid1a             | 476   | 154  | -1,58 | 9,59E-04 |
| ENSDARG0000000093253 | si:dkey-229d2.4   | 45    | 13   | -1,58 | 3,62E-02 |
| ENSDARG000000069795  | zgc:154058        | 918   | 288  | -1,58 | 8,14E-03 |
| ENSDARG000000078676  | myrf              | 100   | 30   | -1,58 | 3,59E-02 |
| ENSDARG0000000039881 | cemip             | 107   | 33   | -1,58 | 1,50E-02 |
| ENSDARG000000086034  | nectin1b          | 196   | 60   | -1,59 | 1,33E-02 |
| ENSDARG000000104358  | FP016005.1        | 28    | 8    | -1,59 | 4,55E-02 |
| ENSDARG000000007220  | ncam1b            | 1485  | 474  | -1,59 | 1,51E-03 |
| ENSDARG000000075904  | rxf1b             | 38    | 11   | -1,60 | 3,05E-02 |
| ENSDARG000000008859  | mylipa            | 1198  | 378  | -1,60 | 2,60E-03 |
| ENSDARG0000000096701 | si:dkey-21e13.3   | 47    | 14   | -1,60 | 4,38E-02 |
| ENSDARG000000052113  | hexa              | 1034  | 325  | -1,60 | 2,57E-03 |
| ENSDARG000000022372  | kng1              | 655   | 199  | -1,60 | 1,85E-02 |
| ENSDARG000000063167  | chkb              | 1035  | 322  | -1,60 | 4,54E-03 |
| ENSDARG000000115428  | CABZ01101813.1    | 434   | 137  | -1,60 | 1,44E-03 |
| ENSDARG000000001154  | rimbp2            | 477   | 143  | -1,60 | 2,04E-02 |
| ENSDARG0000000036548 | s1pr2             | 292   | 87   | -1,60 | 3,05E-02 |
| ENSDARG000000090997  | vegfa             | 534   | 166  | -1,60 | 4,55E-03 |
| ENSDARG000000087843  | cntn1a            | 168   | 51   | -1,60 | 2,26E-02 |
| ENSDARG000000027290  | nrbp1             | 709   | 211  | -1,60 | 2,73E-02 |
| ENSDARG000000086790  | gucy1b1           | 1203  | 381  | -1,61 | 5,75E-04 |
| ENSDARG0000000074149 | itpr1b            | 598   | 183  | -1,61 | 8,57E-03 |
| ENSDARG000000101722  | larp1             | 124   | 36   | -1,61 | 3,83E-02 |
| ENSDARG000000062154  | dip2ca            | 825   | 256  | -1,61 | 3,79E-03 |
| ENSDARG000000088581  | f10               | 556   | 171  | -1,61 | 5,21E-03 |
| ENSDARG000000011065  | camk2b1           | 882   | 274  | -1,61 | 3,06E-03 |
| ENSDARG000000100274  | WDR7              | 421   | 127  | -1,61 | 1,59E-02 |
| ENSDARG0000000010957 | mpp2b             | 372   | 115  | -1,62 | 2,93E-03 |
| ENSDARG000000098405  | map3k1            | 488   | 147  | -1,62 | 1,44E-02 |
| ENSDARG000000040380  | arhgef1a          | 697   | 208  | -1,62 | 1,53E-02 |
| ENSDARG000000059064  | rassf3            | 173   | 52   | -1,62 | 1,41E-02 |
| ENSDARG000000075831  | slc7a8a           | 406   | 116  | -1,62 | 3,95E-02 |
| ENSDARG000000057007  | ctbp1             | 3435  | 1078 | -1,63 | 3,12E-04 |
| ENSDARG0000000090787 | klhdc8b           | 184   | 53   | -1,63 | 3,13E-02 |
| ENSDARG000000079742  | mcf2l2            | 393   | 121  | -1,63 | 2,57E-03 |
| ENSDARG00000004176   | ulk4              | 171   | 53   | -1,63 | 3,07E-03 |
| ENSDARG000000116666  | CABZ01078320.1    | 28    | 8    | -1,63 | 4,22E-02 |
| ENSDARG000000052468  | GSK3B (1 of many) | 340   | 102  | -1,63 | 1,33E-02 |
| ENSDARG000000017294  | gnai2b            | 1158  | 352  | -1,63 | 4,81E-03 |
| ENSDARG0000000040064 | acp6              | 563   | 170  | -1,63 | 5,91E-03 |
| ENSDARG000000073688  | nav2a             | 1089  | 330  | -1,63 | 6,41E-03 |
| ENSDARG000000091326  | cep120            | 92    | 27   | -1,64 | 1,51E-02 |
| ENSDARG000000010385  | sept4a            | 501   | 142  | -1,64 | 3,78E-02 |
| ENSDARG000000074752  | hlfa              | 626   | 188  | -1,64 | 8,02E-03 |
| ENSDARG000000079634  | filip1b           | 51    | 15   | -1,64 | 1,42E-02 |
| ENSDARG0000000053636 | cracr2b           | 117   | 33   | -1,64 | 3,18E-02 |
| ENSDARG000000059747  | kcnj19a           | 526   | 153  | -1,64 | 2,01E-02 |

|                     |                   |      |      |       |          |
|---------------------|-------------------|------|------|-------|----------|
| ENSDARG00000079283  | si:ch211-247j9.1  | 446  | 132  | -1,64 | 1,22E-02 |
| ENSDARG00000010318  | srpx              | 41   | 12   | -1,65 | 3,17E-02 |
| ENSDARG00000038106  | slc37a4a          | 490  | 148  | -1,65 | 2,41E-03 |
| ENSDARG00000012496  | GPR62 (1 of many) | 299  | 89   | -1,65 | 6,48E-03 |
| ENSDARG00000043055  | hiat1b            | 1057 | 328  | -1,65 | 8,55E-05 |
| ENSDARG00000093093  | adam17b           | 458  | 136  | -1,66 | 6,27E-03 |
| ENSDARG00000057419  | slc44a5b          | 1354 | 407  | -1,66 | 2,27E-03 |
| ENSDARG000000035859 | angptl4           | 1562 | 444  | -1,66 | 1,86E-02 |
| ENSDARG00000034093  | dclk2a            | 290  | 86   | -1,67 | 3,79E-03 |
| ENSDARG00000079396  | lrfn5b            | 113  | 33   | -1,67 | 1,43E-02 |
| ENSDARG000000110940 | ptprsa            | 249  | 70   | -1,67 | 3,02E-02 |
| ENSDARG000000102636 | trmt9b            | 1151 | 317  | -1,67 | 4,04E-02 |
| ENSDARG000000056196 | slc2a2            | 2018 | 574  | -1,67 | 1,53E-02 |
| ENSDARG00000077839  | dhx30             | 107  | 30   | -1,68 | 1,87E-02 |
| ENSDARG00000078560  | slc9a5            | 199  | 55   | -1,69 | 2,44E-02 |
| ENSDARG00000079835  | man2c1            | 1756 | 495  | -1,69 | 1,30E-02 |
| ENSDARG00000036826  | ankrd52a          | 157  | 45   | -1,69 | 1,38E-02 |
| ENSDARG00000045803  | mfge8b            | 5393 | 1539 | -1,69 | 8,17E-03 |
| ENSDARG000000102125 | iqsec2a           | 501  | 136  | -1,70 | 3,06E-02 |
| ENSDARG00000021735  | cacna1ba          | 389  | 112  | -1,70 | 5,81E-03 |
| ENSDARG000000104549 | arhgap44          | 264  | 75   | -1,70 | 1,15E-02 |
| ENSDARG000000102610 | R3HDM2            | 181  | 51   | -1,70 | 8,93E-03 |
| ENSDARG00000054749  | lmo4b             | 218  | 58   | -1,70 | 3,11E-02 |
| ENSDARG00000032990  | plxnb3            | 58   | 15   | -1,70 | 3,59E-02 |
| ENSDARG000000113657 | LO018363.2        | 101  | 28   | -1,71 | 1,99E-02 |
| ENSDARG00000028857  | sgsm1a            | 2425 | 685  | -1,71 | 7,47E-03 |
| ENSDARG00000018716  | dgkh              | 647  | 187  | -1,71 | 1,42E-03 |
| ENSDARG00000087299  | armc9             | 166  | 48   | -1,71 | 2,20E-03 |
| ENSDARG000000111110 | CABZ01086611.1    | 797  | 232  | -1,71 | 1,08E-03 |
| ENSDARG00000036058  | gnao1b            | 843  | 244  | -1,71 | 1,21E-03 |
| ENSDARG000000023659 | gabpb1            | 39   | 10   | -1,72 | 3,08E-02 |
| ENSDARG00000056874  | lygl1             | 734  | 209  | -1,72 | 3,56E-03 |
| ENSDARG00000029952  | ampd2b            | 787  | 232  | -1,72 | 1,75E-04 |
| ENSDARG00000075334  | arhgap32a         | 132  | 36   | -1,72 | 1,42E-02 |
| ENSDARG00000098683  | zmiz2             | 581  | 164  | -1,72 | 3,96E-03 |
| ENSDARG000000102056 | si:dkeyp-94b4.1   | 225  | 64   | -1,72 | 2,73E-03 |
| ENSDARG000000073952 | slc4a7            | 618  | 172  | -1,73 | 7,96E-03 |
| ENSDARG00000063149  | tmtc1             | 818  | 224  | -1,73 | 1,15E-02 |
| ENSDARG00000014081  | fam184a           | 533  | 151  | -1,73 | 2,52E-03 |
| ENSDARG000000104101 | si:ch73-287m6.1   | 643  | 184  | -1,73 | 1,97E-03 |
| ENSDARG00000077228  | ntrk3a            | 442  | 117  | -1,73 | 2,42E-02 |
| ENSDARG00000063578  | CABZ01020835.1    | 152  | 42   | -1,73 | 8,77E-03 |
| ENSDARG000000042859 | slc5a6a           | 154  | 43   | -1,73 | 8,50E-03 |
| ENSDARG000000104573 | slc12a2           | 624  | 179  | -1,73 | 7,23E-04 |
| ENSDARG00000006257  | vldlr             | 576  | 163  | -1,73 | 1,58E-03 |
| ENSDARG00000010267  | dpydb             | 130  | 35   | -1,74 | 1,50E-02 |
| ENSDARG00000062812  | glsa              | 1103 | 305  | -1,74 | 5,60E-03 |
| ENSDARG000000002791 | atp1a1a.1         | 1857 | 528  | -1,74 | 7,63E-04 |
| ENSDARG00000018259  | atp1a3a           | 2852 | 802  | -1,74 | 1,67E-03 |
| ENSDARG00000058108  | eps8l2            | 240  | 66   | -1,75 | 7,37E-03 |
| ENSDARG00000099802  | pnp5b             | 134  | 37   | -1,75 | 6,63E-03 |
| ENSDARG00000021938  | smad9             | 147  | 41   | -1,75 | 4,19E-03 |
| ENSDARG00000007494  | st3gal8           | 733  | 200  | -1,75 | 6,73E-03 |
| ENSDARG000000002731 | sdcc2             | 1627 | 463  | -1,75 | 3,29E-04 |
| ENSDARG000000101606 | rims2a            | 3667 | 986  | -1,75 | 8,66E-03 |
| ENSDARG000000102765 | lonp1             | 175  | 48   | -1,75 | 8,01E-03 |
| ENSDARG00000096637  | si:dkey-11c5.11   | 100  | 26   | -1,76 | 2,12E-02 |
| ENSDARG00000017391  | unc13ba           | 138  | 37   | -1,76 | 1,05E-02 |
| ENSDARG00000009677  | dlg1              | 957  | 262  | -1,76 | 3,76E-03 |
| ENSDARG000000044295 | pip5k1ba          | 199  | 54   | -1,76 | 4,61E-03 |
| ENSDARG00000070903  | met               | 64   | 16   | -1,76 | 3,49E-02 |
| ENSDARG00000094696  | si:dkey-201c13.2  | 34   | 9    | -1,76 | 3,38E-02 |
| ENSDARG000000087921 | plce1             | 1181 | 322  | -1,77 | 3,50E-03 |
| ENSDARG000000101210 | glg1b             | 220  | 60   | -1,77 | 3,39E-03 |
| ENSDARG00000057227  | si:dkey-222b8.4   | 17   | 4    | -1,77 | 2,83E-02 |
| ENSDARG000000076386 | epdl1             | 982  | 242  | -1,78 | 3,77E-02 |
| ENSDARG00000012914  | arhgef4           | 446  | 121  | -1,78 | 2,41E-03 |
| ENSDARG00000054448  | kif1c             | 106  | 27   | -1,78 | 2,43E-02 |
| ENSDARG00000055540  | pfkfb4a           | 2144 | 575  | -1,79 | 4,30E-03 |
| ENSDARG00000075083  | prkdc             | 1239 | 326  | -1,79 | 6,63E-03 |
| ENSDARG00000026376  | aco1              | 414  | 112  | -1,79 | 1,76E-03 |
| ENSDARG000000037495 | rtn4rl2b          | 3396 | 794  | -1,80 | 4,64E-02 |
| ENSDARG00000017127  | pdzk1ip1          | 947  | 255  | -1,80 | 2,32E-03 |

|                     |                   |        |       |       |          |
|---------------------|-------------------|--------|-------|-------|----------|
| ENSDARG00000111069  | lgi2a             | 940    | 225   | -1,80 | 4,94E-02 |
| ENSDARG00000061099  | nfasca            | 1744   | 478   | -1,80 | 4,19E-04 |
| ENSDARG00000036008  | caly              | 2096   | 526   | -1,80 | 1,79E-02 |
| ENSDARG00000043342  | gpx3              | 10911  | 2959  | -1,80 | 8,43E-04 |
| ENSDARG00000020387  | nipsnap3a         | 275    | 71    | -1,80 | 9,25E-03 |
| ENSDARG00000030357  | zgc:66313         | 899    | 228   | -1,81 | 1,32E-02 |
| ENSDARG00000029859  | si:ch211-241d21.5 | 65     | 16    | -1,81 | 3,36E-02 |
| ENSDARG000000058232 | fbrsl1            | 433    | 118   | -1,81 | 3,03E-04 |
| ENSDARG00000017929  | ncoa2             | 2490   | 669   | -1,82 | 7,46E-04 |
| ENSDARG00000062190  | PDE3B             | 1188   | 319   | -1,82 | 6,00E-04 |
| ENSDARG00000001634  | kirrel1a          | 58     | 15    | -1,83 | 1,16E-02 |
| ENSDARG00000102583  | il4r.1            | 209    | 48    | -1,83 | 3,37E-02 |
| ENSDARG000000028507 | itgb4             | 76     | 18    | -1,83 | 3,50E-02 |
| ENSDARG00000007753  | cpne2             | 629    | 156   | -1,83 | 1,19E-02 |
| ENSDARG00000076416  | shroom2a          | 584    | 158   | -1,83 | 1,13E-04 |
| ENSDARG00000062352  | sema4ab           | 152    | 37    | -1,83 | 2,44E-02 |
| ENSDARG00000078748  | si:ch211-137a8.4  | 632    | 167   | -1,84 | 7,54E-04 |
| ENSDARG00000009493  | MAP3K13           | 185    | 44    | -1,84 | 2,44E-02 |
| ENSDARG000000054186 | ncs1b             | 158    | 41    | -1,84 | 2,94E-03 |
| ENSDARG00000071005  | ppp1r3ca          | 289    | 65    | -1,84 | 4,74E-02 |
| ENSDARG00000026028  | ankrd44           | 85     | 21    | -1,84 | 1,37E-02 |
| ENSDARG00000036424  | pcdh20            | 1497   | 399   | -1,85 | 1,76E-04 |
| ENSDARG00000079251  | nlgn2b            | 207    | 52    | -1,85 | 1,17E-02 |
| ENSDARG00000102051  | mtbl              | 1495   | 383   | -1,85 | 2,80E-03 |
| ENSDARG000000112870 | CABZ01021599.1    | 20     | 5     | -1,86 | 3,67E-02 |
| ENSDARG00000112961  | LO017848.1        | 39     | 9     | -1,86 | 2,65E-02 |
| ENSDARG00000043154  | ucp2              | 5212   | 1314  | -1,86 | 3,78E-03 |
| ENSDARG00000058646  | ptprna            | 9392   | 2479  | -1,86 | 1,34E-04 |
| ENSDARG00000063307  | sgsm2             | 251    | 64    | -1,86 | 2,41E-03 |
| ENSDARG00000068194  | klf9              | 736    | 176   | -1,87 | 1,37E-02 |
| ENSDARG000000075821 | plxnb1a           | 1246   | 316   | -1,87 | 2,07E-03 |
| ENSDARG00000023694  | spon1b            | 6256   | 1663  | -1,87 | 1,42E-05 |
| ENSDARG00000051861  | pkp3a             | 305    | 74    | -1,87 | 9,27E-03 |
| ENSDARG00000016774  | plekho2           | 355    | 78    | -1,88 | 4,01E-02 |
| ENSDARG00000008026  | fam129bb          | 193    | 48    | -1,88 | 3,33E-03 |
| ENSDARG00000101413  | duzp7             | 1258   | 321   | -1,88 | 6,82E-04 |
| ENSDARG00000070809  | znf516            | 67     | 16    | -1,89 | 9,12E-03 |
| ENSDARG00000104068  | gstp1             | 500    | 119   | -1,89 | 9,00E-03 |
| ENSDARG00000078425  | oat               | 238    | 56    | -1,89 | 1,30E-02 |
| ENSDARG00000040633  | PRMT8             | 77     | 19    | -1,89 | 2,89E-03 |
| ENSDARG00000035660  | si:ch211-193k19.1 | 703    | 176   | -1,90 | 1,43E-03 |
| ENSDARG00000061976  | sema6bb           | 326    | 78    | -1,90 | 7,13E-03 |
| ENSDARG00000014556  | serpinb1l3        | 879    | 213   | -1,90 | 4,26E-03 |
| ENSDARG00000079453  | atp8b4            | 415    | 104   | -1,90 | 7,56E-04 |
| ENSDARG00000010946  | cbsb              | 223    | 48    | -1,91 | 3,05E-02 |
| ENSDARG00000057708  | zgc:175264        | 2586   | 665   | -1,91 | 6,58E-05 |
| ENSDARG00000079962  | doc2d             | 455    | 105   | -1,91 | 1,49E-02 |
| ENSDARG000000062135 | sytl5             | 167    | 41    | -1,91 | 2,44E-03 |
| ENSDARG00000069028  | rxfp3.3a1         | 369    | 81    | -1,91 | 3,29E-02 |
| ENSDARG00000021611  | si:dkey-151g10.3  | 368    | 92    | -1,91 | 7,78E-04 |
| ENSDARG00000090617  | ctif              | 108    | 23    | -1,91 | 3,70E-02 |
| ENSDARG00000111920  | cplx1             | 56     | 12    | -1,91 | 2,12E-02 |
| ENSDARG00000102715  | UST (1 of many)   | 56     | 12    | -1,91 | 2,42E-02 |
| ENSDARG000000080021 | zmat3             | 28     | 6     | -1,91 | 4,47E-02 |
| ENSDARG00000077920  | CSMD3 (1 of many) | 729    | 168   | -1,92 | 1,39E-02 |
| ENSDARG00000009930  | cadm2a            | 4102   | 981   | -1,92 | 4,15E-03 |
| ENSDARG00000002779  | pdx1              | 17171  | 3619  | -1,93 | 3,44E-02 |
| ENSDARG00000096304  | btr31             | 107    | 26    | -1,93 | 2,29E-03 |
| ENSDARG00000107858  | CABZ01073424.1    | 154    | 36    | -1,94 | 8,04E-03 |
| ENSDARG000000089458 | rp1l1a            | 37     | 8     | -1,94 | 2,67E-02 |
| ENSDARG00000101482  | hk2               | 46     | 9     | -1,94 | 4,05E-02 |
| ENSDARG00000006474  | saxo2             | 45     | 9     | -1,95 | 3,80E-02 |
| ENSDARG00000059202  | tspan2b           | 47     | 10    | -1,95 | 3,26E-02 |
| ENSDARG00000079869  | si:ch211-218o21.4 | 91     | 19    | -1,95 | 2,64E-02 |
| ENSDARG00000031317  | ppdpfb            | 28857  | 6643  | -1,95 | 4,16E-03 |
| ENSDARG00000014587  | slc38a5b          | 398    | 91    | -1,95 | 7,71E-03 |
| ENSDARG00000045911  | tulp4a            | 660    | 151   | -1,95 | 7,18E-03 |
| ENSDARG00000078729  | ackr4a            | 95     | 21    | -1,95 | 1,22E-02 |
| ENSDARG00000070683  | dkk3b             | 132721 | 29215 | -1,95 | 1,37E-02 |
| ENSDARG00000060113  | znf395a           | 901    | 207   | -1,96 | 4,81E-03 |
| ENSDARG00000034086  | zgc:65895         | 434    | 101   | -1,96 | 4,54E-03 |
| ENSDARG00000075188  | adamts10          | 32     | 7     | -1,96 | 3,88E-02 |
| ENSDARG00000052765  | gria2b            | 995    | 245   | -1,97 | 3,44E-05 |

|                     |                   |       |       |       |          |
|---------------------|-------------------|-------|-------|-------|----------|
| ENSDARG00000069407  | zgc:194990        | 1426  | 324   | -1,97 | 4,92E-03 |
| ENSDARG00000017365  | slc23a2           | 1761  | 433   | -1,97 | 2,36E-05 |
| ENSDARG00000031422  | igfbp2b           | 2610  | 613   | -1,98 | 9,30E-04 |
| ENSDARG00000061497  | thsd7bb           | 122   | 25    | -1,98 | 2,34E-02 |
| ENSDARG00000002607  | unm_sa1614        | 1123  | 257   | -1,99 | 2,78E-03 |
| ENSDARG00000004634  | osbp              | 512   | 113   | -1,99 | 7,83E-03 |
| ENSDARG00000107441  | CABZ01063170.1    | 251   | 56    | -1,99 | 7,56E-03 |
| ENSDARG000000042677 | cadm1b            | 493   | 112   | -1,99 | 3,25E-03 |
| ENSDARG00000052734  | hmgcra            | 303   | 61    | -1,99 | 2,15E-02 |
| ENSDARG00000014967  | g6pcb             | 8208  | 1085  | -1,99 | 4,16E-02 |
| ENSDARG00000006065  | znf385b           | 79    | 17    | -1,99 | 1,81E-02 |
| ENSDARG00000001912  | drd4-rs           | 333   | 62    | -1,99 | 4,67E-02 |
| ENSDARG000000077709 | iqsec2b           | 78    | 16    | -2,00 | 3,66E-02 |
| ENSDARG00000045644  | ca12              | 3468  | 750   | -2,00 | 8,77E-03 |
| ENSDARG00000114329  | HOOK3             | 41    | 8     | -2,00 | 3,01E-02 |
| ENSDARG00000090914  | si:ch211-117k10.3 | 73    | 16    | -2,01 | 7,71E-03 |
| ENSDARG00000077083  | avpr1aa           | 4343  | 904   | -2,01 | 1,73E-02 |
| ENSDARG00000077523  | tdrd7b            | 114   | 25    | -2,01 | 6,61E-03 |
| ENSDARG000000069765 | syngap1b          | 84    | 17    | -2,02 | 3,64E-02 |
| ENSDARG00000038574  | scg2b             | 13267 | 3094  | -2,02 | 1,90E-04 |
| ENSDARG00000074184  | arhgap32b         | 713   | 163   | -2,02 | 6,52E-04 |
| ENSDARG00000063649  | tead3b            | 131   | 30    | -2,02 | 1,72E-03 |
| ENSDARG00000021924  | hsp70.3           | 3483  | 682   | -2,02 | 3,08E-02 |
| ENSDARG00000112868  | CABZ01073424.2    | 74    | 16    | -2,02 | 6,61E-03 |
| ENSDARG00000102888  | gpr39             | 72    | 15    | -2,02 | 1,02E-02 |
| ENSDARG00000099985  | cyr61l2           | 458   | 98    | -2,02 | 7,03E-03 |
| ENSDARG00000061011  | hlfb              | 233   | 49    | -2,03 | 9,44E-03 |
| ENSDARG00000054318  | stk33             | 327   | 70    | -2,03 | 6,07E-03 |
| ENSDARG00000067859  | scospondin        | 91    | 18    | -2,03 | 3,40E-02 |
| ENSDARG00000000472  | cntn2             | 215   | 46    | -2,03 | 4,87E-03 |
| ENSDARG00000115832  | LO018490.1        | 26    | 6     | -2,05 | 4,98E-03 |
| ENSDARG00000063371  | rasa3             | 44    | 8     | -2,06 | 2,36E-02 |
| ENSDARG00000052000  | cav2              | 1117  | 242   | -2,06 | 2,01E-03 |
| ENSDARG00000104480  | hcn1              | 205   | 41    | -2,06 | 1,53E-02 |
| ENSDARG00000100170  | pam               | 15650 | 3575  | -2,07 | 3,66E-05 |
| ENSDARG00000088168  | ablim3            | 53    | 10    | -2,07 | 1,99E-02 |
| ENSDARG000000009949 | fnkc4b            | 857   | 175   | -2,07 | 7,78E-03 |
| ENSDARG00000077022  | fam131a           | 101   | 22    | -2,07 | 2,60E-03 |
| ENSDARG00000018896  | mmp24             | 39    | 7     | -2,07 | 2,86E-02 |
| ENSDARG00000022668  | grapb             | 712   | 134   | -2,08 | 1,75E-02 |
| ENSDARG00000096739  | si:dkey-219e21.2  | 76    | 15    | -2,08 | 1,08E-02 |
| ENSDARG00000077656  | arfgef3           | 3627  | 780   | -2,08 | 1,11E-03 |
| ENSDARG00000103554  | notch1a           | 118   | 25    | -2,08 | 2,89E-03 |
| ENSDARG00000015495  | klf3              | 337   | 65    | -2,09 | 1,91E-02 |
| ENSDARG00000075851  | oafa              | 159   | 31    | -2,09 | 9,91E-03 |
| ENSDARG00000005541  | wif1              | 3501  | 694   | -2,09 | 8,39E-03 |
| ENSDARG00000060601  | rgs7bpa           | 63    | 11    | -2,09 | 4,27E-02 |
| ENSDARG000000020759 | elf1              | 1747  | 386   | -2,10 | 1,12E-04 |
| ENSDARG00000061549  | foxo1b            | 42    | 7     | -2,10 | 2,67E-02 |
| ENSDARG00000061140  | colec12           | 55    | 9     | -2,11 | 2,97E-02 |
| ENSDARG00000063726  | cdk12             | 892   | 194   | -2,11 | 1,86E-04 |
| ENSDARG00000100606  | BX539336.1        | 484   | 101   | -2,11 | 1,84E-03 |
| ENSDARG00000074319  | sall1a            | 3009  | 600   | -2,11 | 4,81E-03 |
| ENSDARG000000062204 | sigirr            | 1066  | 221   | -2,11 | 1,76E-03 |
| ENSDARG00000092660  | cyp27c1           | 178   | 31    | -2,11 | 2,15E-02 |
| ENSDARG00000077569  | lrrn3a            | 214   | 45    | -2,11 | 9,29E-04 |
| ENSDARG00000024365  | crlf1a            | 105   | 21    | -2,12 | 3,94E-03 |
| ENSDARG00000039500  | LRFN3             | 101   | 20    | -2,12 | 5,96E-03 |
| ENSDARG00000103479  | ptprfa            | 636   | 127   | -2,12 | 3,84E-03 |
| ENSDARG00000088083  | sik3              | 539   | 102   | -2,12 | 1,29E-02 |
| ENSDARG00000070047  | rgs4              | 828   | 172   | -2,12 | 9,64E-04 |
| ENSDARG00000060222  | scn1ba            | 38    | 6     | -2,13 | 4,91E-02 |
| ENSDARG00000035832  | pyyb              | 8838  | 1689  | -2,13 | 8,24E-03 |
| ENSDARG00000056978  | letm1             | 2238  | 475   | -2,13 | 2,29E-04 |
| ENSDARG00000025024  | pnoca             | 20643 | 3844  | -2,14 | 9,79E-03 |
| ENSDARG000000033916 | si:ch211-243j20.2 | 1928  | 391   | -2,14 | 1,53E-03 |
| ENSDARG00000002644  | rgs5a             | 77783 | 14972 | -2,15 | 5,25E-03 |
| ENSDARG00000074182  | prokr1a           | 353   | 70    | -2,15 | 2,39E-03 |
| ENSDARG00000021806  | zfp36l2           | 136   | 25    | -2,15 | 1,15E-02 |
| ENSDARG00000042282  | itga6a            | 496   | 102   | -2,15 | 4,52E-04 |
| ENSDARG00000045139  | ca7               | 1365  | 250   | -2,16 | 1,07E-02 |
| ENSDARG00000063133  | slc4a10a          | 585   | 120   | -2,16 | 5,03E-04 |
| ENSDARG00000063433  | atp2b2            | 174   | 34    | -2,16 | 2,69E-03 |

|                     |                   |       |      |       |          |
|---------------------|-------------------|-------|------|-------|----------|
| ENSDARG00000102687  | CABZ01085139.1    | 535   | 73   | -2,16 | 2,52E-02 |
| ENSDARG00000061096  | dapk2a            | 159   | 30   | -2,16 | 6,75E-03 |
| ENSDARG00000052011  | rrad              | 292   | 48   | -2,16 | 2,02E-02 |
| ENSDARG00000095743  | sox11b            | 636   | 115  | -2,17 | 1,27E-02 |
| ENSDARG00000109663  | LO016987.2        | 51    | 10   | -2,17 | 6,65E-03 |
| ENSDARG00000018393  | kank2             | 143   | 30   | -2,17 | 9,98E-05 |
| ENSDARG00000102972  | CABZ01075125.1    | 95    | 16   | -2,17 | 2,27E-02 |
| ENSDARG00000035009  | trim35-27         | 38    | 7    | -2,18 | 2,23E-02 |
| ENSDARG00000032206  | cthl              | 506   | 73   | -2,18 | 4,31E-02 |
| ENSDARG00000088709  | tnfaip8l3         | 211   | 41   | -2,18 | 1,84E-03 |
| ENSDARG00000101703  | zgc:158260        | 35    | 5    | -2,18 | 3,43E-02 |
| ENSDARG00000060415  | arhgef28          | 1119  | 227  | -2,18 | 3,77E-04 |
| ENSDARG00000071042  | cx28.8            | 319   | 60   | -2,19 | 6,59E-03 |
| ENSDARG00000015003  | arhgap4b          | 31    | 5    | -2,19 | 4,06E-02 |
| ENSDARG00000042529  | gnat2             | 38    | 6    | -2,19 | 3,14E-02 |
| ENSDARG00000016858  | smad7             | 220   | 43   | -2,19 | 1,11E-03 |
| ENSDARG00000033840  | fat3a             | 111   | 17   | -2,20 | 4,08E-02 |
| ENSDARG00000067912  | MAN1C1            | 65    | 11   | -2,20 | 1,30E-02 |
| ENSDARG00000045594  | shisal1a          | 1711  | 345  | -2,20 | 1,75E-04 |
| ENSDARG00000023797  | ryr1b             | 40    | 6    | -2,20 | 3,56E-02 |
| ENSDARG00000091548  | stard9            | 51    | 8    | -2,21 | 2,28E-02 |
| ENSDARG00000059616  | hs3st2            | 93    | 16   | -2,21 | 1,79E-02 |
| ENSDARG00000060678  | ndst2b            | 268   | 52   | -2,21 | 8,47E-04 |
| ENSDARG00000092638  | ptprua            | 1512  | 291  | -2,22 | 1,11E-03 |
| ENSDARG00000033327  | unc5b             | 123   | 21   | -2,22 | 1,15E-02 |
| ENSDARG00000099096  | gabrb4            | 175   | 33   | -2,22 | 2,23E-03 |
| ENSDARG00000044415  | tlr5a             | 151   | 26   | -2,22 | 1,24E-02 |
| ENSDARG00000105657  | si:cabz01080528.1 | 62    | 11   | -2,22 | 9,34E-03 |
| ENSDARG00000008127  | pcdh15b           | 335   | 64   | -2,22 | 8,47E-04 |
| ENSDARG00000057826  | si:ch73-61d6.3    | 112   | 20   | -2,23 | 6,49E-03 |
| ENSDARG000000069014 | nphp4             | 311   | 61   | -2,23 | 5,69E-04 |
| ENSDARG00000100594  | sez6l             | 206   | 32   | -2,23 | 2,07E-02 |
| ENSDARG00000088100  | KCNIP4            | 343   | 62   | -2,24 | 3,88E-03 |
| ENSDARG00000061328  | cdon              | 82    | 14   | -2,24 | 3,60E-03 |
| ENSDARG00000103205  | si:ch211-161f7.2  | 22    | 3    | -2,24 | 3,35E-02 |
| ENSDARG00000074921  | fam117ba          | 87    | 14   | -2,24 | 1,73E-02 |
| ENSDARG00000004576  | plk4              | 84    | 11   | -2,25 | 3,33E-02 |
| ENSDARG00000092362  | hsp70.2           | 1993  | 329  | -2,25 | 1,63E-02 |
| ENSDARG00000014320  | gucy2c            | 782   | 148  | -2,25 | 6,01E-04 |
| ENSDARG00000086214  | ntrk3b            | 438   | 77   | -2,25 | 4,14E-03 |
| ENSDARG00000099079  | acly              | 3419  | 670  | -2,25 | 9,98E-05 |
| ENSDARG00000021909  | VSTM2A            | 145   | 27   | -2,25 | 3,27E-03 |
| ENSDARG00000075817  | mettl24           | 129   | 22   | -2,25 | 9,64E-03 |
| ENSDARG00000079618  | sik2a             | 211   | 39   | -2,26 | 1,08E-03 |
| ENSDARG00000062621  | satb1b            | 23    | 3    | -2,26 | 3,59E-02 |
| ENSDARG00000076998  | si:ch73-92i20.1   | 34    | 5    | -2,26 | 1,18E-02 |
| ENSDARG00000067824  | cntnap3           | 25    | 3    | -2,26 | 4,82E-02 |
| ENSDARG00000030376  | grin2bb           | 295   | 54   | -2,27 | 1,60E-03 |
| ENSDARG00000024654  | pgm3              | 1746  | 317  | -2,28 | 9,59E-04 |
| ENSDARG00000061248  | xylt1             | 424   | 74   | -2,28 | 3,48E-03 |
| ENSDARG00000044161  | grid1b            | 632   | 108  | -2,28 | 4,23E-03 |
| ENSDARG00000100043  | CABZ0111454.1     | 26    | 4    | -2,28 | 3,06E-02 |
| ENSDARG00000079414  | sez6b             | 848   | 136  | -2,29 | 1,94E-02 |
| ENSDARG00000086057  | plxnd1            | 100   | 11   | -2,29 | 3,47E-02 |
| ENSDARG00000098408  | stbd1             | 56    | 9    | -2,29 | 1,40E-02 |
| ENSDARG00000054321  | ngs               | 29    | 3    | -2,29 | 3,72E-02 |
| ENSDARG00000079253  | plch1             | 71    | 10   | -2,30 | 2,12E-02 |
| ENSDARG00000077047  | ptprnb            | 16370 | 3081 | -2,30 | 1,29E-04 |
| ENSDARG00000025902  | plekhg5a          | 466   | 86   | -2,30 | 4,52E-04 |
| ENSDARG00000098578  | pdgfab            | 298   | 51   | -2,30 | 3,10E-03 |
| ENSDARG00000018065  | ntm               | 158   | 26   | -2,31 | 8,14E-03 |
| ENSDARG00000087753  | CR388166.1        | 48    | 6    | -2,32 | 3,88E-02 |
| ENSDARG00000015515  | mc4r              | 444   | 75   | -2,32 | 3,50E-03 |
| ENSDARG00000077596  | phf24             | 145   | 22   | -2,32 | 1,55E-02 |
| ENSDARG00000062415  | ctnnd2a           | 71    | 11   | -2,32 | 9,32E-03 |
| ENSDARG00000100128  | CU861477.1        | 192   | 30   | -2,32 | 2,43E-02 |
| ENSDARG00000035875  | tmem54b           | 523   | 83   | -2,32 | 1,32E-02 |
| ENSDARG00000019945  | ptprdb            | 975   | 181  | -2,33 | 9,31E-05 |
| ENSDARG00000041616  | b3gnt9            | 38    | 5    | -2,33 | 1,62E-02 |
| ENSDARG00000055854  | nr4a3             | 241   | 39   | -2,33 | 6,25E-03 |
| ENSDARG00000071230  | lrfn5a            | 167   | 29   | -2,33 | 1,15E-03 |
| ENSDARG00000042368  | kif26aa           | 155   | 26   | -2,33 | 4,89E-03 |
| ENSDARG00000043317  | kita              | 263   | 40   | -2,34 | 9,13E-03 |

|                     |                    |       |      |       |          |
|---------------------|--------------------|-------|------|-------|----------|
| ENSDARG00000092199  | si:ch211-250c4.4   | 543   | 83   | -2,34 | 7,33E-03 |
| ENSDARG000000103390 | cacna2d2a          | 1930  | 346  | -2,34 | 3,37E-04 |
| ENSDARG00000028824  | slc34a1a           | 428   | 72   | -2,34 | 2,60E-03 |
| ENSDARG00000060372  | plxna2             | 97    | 15   | -2,34 | 8,31E-03 |
| ENSDARG00000071772  | si:ch211-253p2.2   | 110   | 19   | -2,35 | 8,69E-04 |
| ENSDARG00000096327  | cd164l2            | 137   | 20   | -2,35 | 8,19E-03 |
| ENSDARG00000039453  | dhrr7ca            | 181   | 24   | -2,35 | 3,51E-02 |
| ENSDARG00000071493  | olm3a              | 103   | 11   | -2,35 | 3,02E-02 |
| ENSDARG00000019418  | kcnj2a             | 1372  | 244  | -2,35 | 2,29E-04 |
| ENSDARG00000089172  | si:ch1073-391i24.1 | 144   | 23   | -2,35 | 5,88E-03 |
| ENSDARG000000100166 | si:dkeyp-9d4.3     | 2789  | 484  | -2,36 | 4,76E-04 |
| ENSDARG00000061081  | arpp21             | 949   | 155  | -2,36 | 2,18E-03 |
| ENSDARG00000019096  | myl7               | 87    | 11   | -2,36 | 2,31E-02 |
| ENSDARG000000104296 | zgc:165508         | 321   | 52   | -2,36 | 3,22E-03 |
| ENSDARG00000041051  | mid1ip1a           | 28    | 2    | -2,37 | 2,74E-02 |
| ENSDARG00000036541  | rhbdf1a            | 86    | 14   | -2,37 | 1,59E-03 |
| ENSDARG000000104574 | pcsk6              | 680   | 103  | -2,37 | 7,16E-03 |
| ENSDARG00000067545  | adam19b            | 370   | 53   | -2,37 | 1,38E-02 |
| ENSDARG00000079858  | tmem163a           | 189   | 27   | -2,37 | 1,53E-02 |
| ENSDARG00000078169  | cacna2d2b          | 693   | 122  | -2,37 | 1,94E-04 |
| ENSDARG00000074317  | fam20ca            | 92    | 14   | -2,38 | 7,59E-03 |
| ENSDARG00000062199  | si:dkey-217l24.1   | 142   | 23   | -2,38 | 1,89E-03 |
| ENSDARG00000043009  | fam43a             | 87    | 12   | -2,38 | 9,34E-03 |
| ENSDARG00000055539  | epd12              | 38    | 1    | -2,38 | 4,32E-02 |
| ENSDARG00000093081  | si:ch73-92i20.1    | 68    | 10   | -2,38 | 9,97E-03 |
| ENSDARG00000024017  | mdga2a             | 168   | 28   | -2,39 | 1,11E-03 |
| ENSDARG00000023302  | gpbar1             | 219   | 31   | -2,40 | 1,14E-02 |
| ENSDARG00000037142  | zgc:153146         | 22    | 3    | -2,40 | 3,79E-02 |
| ENSDARG00000005754  | ptprfb             | 1424  | 252  | -2,40 | 2,08E-05 |
| ENSDARG000000100313 | pip5k1cb           | 114   | 17   | -2,41 | 2,68E-03 |
| ENSDARG000000034105 | mtus1b             | 823   | 130  | -2,41 | 2,29E-03 |
| ENSDARG00000060010  | iqgap2             | 458   | 76   | -2,42 | 4,76E-04 |
| ENSDARG00000074335  | boc                | 1192  | 173  | -2,42 | 7,47E-03 |
| ENSDARG000000101660 | sntg2              | 870   | 142  | -2,42 | 7,32E-04 |
| ENSDARG00000089858  | cobll1a            | 133   | 19   | -2,42 | 4,80E-03 |
| ENSDARG00000051836  | si:dkeyp-19e1.3    | 33    | 4    | -2,42 | 2,40E-02 |
| ENSDARG000000016868 | rhobtb2a           | 492   | 84   | -2,42 | 1,07E-04 |
| ENSDARG00000029177  | lnx2a              | 2896  | 483  | -2,43 | 2,95E-04 |
| ENSDARG00000098070  | CABZ01085140.1     | 160   | 21   | -2,43 | 8,33E-03 |
| ENSDARG000000114159 | TMEM196 (1 of mai  | 36    | 4    | -2,43 | 1,32E-02 |
| ENSDARG00000076294  | klb                | 1499  | 221  | -2,43 | 4,30E-03 |
| ENSDARG00000069978  | cd28l              | 37    | 4    | -2,43 | 3,62E-02 |
| ENSDARG000000014680 | znf710a            | 65    | 8    | -2,44 | 1,99E-02 |
| ENSDARG000000104100 | bmpr1ba            | 62    | 8    | -2,44 | 1,83E-02 |
| ENSDARG00000027724  | dgkb               | 110   | 16   | -2,44 | 4,98E-03 |
| ENSDARG00000038489  | b3gnt7             | 84    | 12   | -2,44 | 4,52E-03 |
| ENSDARG00000024744  | dpp6b              | 440   | 71   | -2,45 | 4,19E-04 |
| ENSDARG000000016936 | hmcn1              | 597   | 97   | -2,45 | 3,63E-04 |
| ENSDARG00000089444  | omgb               | 93    | 12   | -2,46 | 2,04E-02 |
| ENSDARG000000103396 | znf804b            | 23    | 3    | -2,46 | 1,57E-02 |
| ENSDARG000000116487 | CABZ01039304.1     | 49    | 7    | -2,46 | 1,04E-02 |
| ENSDARG00000029439  | atp2a2a            | 1163  | 189  | -2,46 | 2,49E-04 |
| ENSDARG00000041926  | dlg4a              | 266   | 40   | -2,46 | 2,00E-03 |
| ENSDARG000000025522 | sgk1               | 207   | 26   | -2,47 | 8,39E-03 |
| ENSDARG000000102491 | gpr142             | 692   | 109  | -2,47 | 4,88E-04 |
| ENSDARG00000074212  | SLC5A10            | 21710 | 3251 | -2,47 | 1,71E-03 |
| ENSDARG00000010654  | arhgap42b          | 417   | 66   | -2,47 | 6,34E-04 |
| ENSDARG00000012078  | meis1b             | 1553  | 246  | -2,47 | 3,63E-04 |
| ENSDARG00000022254  | prkcbb             | 554   | 81   | -2,47 | 2,30E-03 |
| ENSDARG00000079985  | nrip2              | 557   | 84   | -2,48 | 1,68E-03 |
| ENSDARG00000059854  | CABZ01041604.1     | 35    | 4    | -2,49 | 2,65E-02 |
| ENSDARG00000030107  | si:ch211-207i1.2   | 414   | 63   | -2,49 | 7,37E-04 |
| ENSDARG00000030411  | crygn2             | 28    | 4    | -2,49 | 7,12E-03 |
| ENSDARG00000061031  | dner               | 38    | 4    | -2,49 | 2,39E-02 |
| ENSDARG00000042128  | pacsin1b           | 76    | 11   | -2,50 | 1,48E-03 |
| ENSDARG00000052648  | hs3st4             | 61    | 7    | -2,50 | 1,43E-02 |
| ENSDARG00000059368  | gria4b             | 542   | 84   | -2,51 | 2,65E-04 |
| ENSDARG00000074219  | map3k20            | 155   | 23   | -2,52 | 8,45E-04 |
| ENSDARG00000031426  | csnnp1a            | 2616  | 392  | -2,52 | 6,73E-04 |
| ENSDARG00000099133  | si:ch73-72b7.1     | 70    | 10   | -2,52 | 8,24E-03 |
| ENSDARG000000104930 | si:dkey-225f23.5   | 357   | 52   | -2,52 | 1,42E-03 |
| ENSDARG00000039959  | gdnfa              | 130   | 15   | -2,52 | 9,63E-03 |
| ENSDARG000000103535 | SORCS3             | 102   | 14   | -2,53 | 3,64E-03 |

|                     |                   |         |        |       |          |
|---------------------|-------------------|---------|--------|-------|----------|
| ENSDARG00000074919  | BFSP1             | 26      | 2      | -2,54 | 3,66E-02 |
| ENSDARG00000076702  | CABZ01068356.1    | 303     | 45     | -2,54 | 4,19E-04 |
| ENSDARG0000006093   | cdk15             | 315     | 46     | -2,54 | 8,48E-04 |
| ENSDARG00000059945  | sv2a              | 958     | 147    | -2,54 | 1,09E-04 |
| ENSDARG00000077864  | rasgrp3           | 246     | 33     | -2,55 | 2,02E-03 |
| ENSDARG00000090844  | CABZ01054965.1    | 211     | 31     | -2,55 | 3,33E-04 |
| ENSDARG00000098312  | scarb2a           | 75      | 4      | -2,55 | 1,85E-02 |
| ENSDARG00000073866  | tdp1              | 135     | 18     | -2,56 | 1,90E-03 |
| ENSDARG00000104326  | si:dkey-183i3.9   | 677     | 95     | -2,56 | 1,03E-03 |
| ENSDARG00000095223  | si:ch211-242f23.3 | 82      | 10     | -2,57 | 8,77E-03 |
| ENSDARG00000101178  | sh3rf2            | 173     | 25     | -2,57 | 4,33E-04 |
| ENSDARG00000113572  | si:dkey-102c8.3   | 80      | 3      | -2,57 | 3,13E-02 |
| ENSDARG00000011190  | fgfr1b            | 1308    | 176    | -2,58 | 2,20E-03 |
| ENSDARG00000058508  | cfap70            | 30      | 4      | -2,58 | 1,27E-02 |
| ENSDARG00000006760  | slc24a3           | 72      | 10     | -2,58 | 2,78E-03 |
| ENSDARG00000041791  | mgat4c            | 105     | 14     | -2,58 | 2,31E-03 |
| ENSDARG00000116937  | BX927333.1        | 2102    | 301    | -2,58 | 4,19E-04 |
| ENSDARG00000070338  | hoxc4a            | 70      | 7      | -2,59 | 8,84E-03 |
| ENSDARG00000115651  | LO017917.1        | 65      | 8      | -2,60 | 4,14E-03 |
| ENSDARG00000037639  | nkx3.2            | 300     | 33     | -2,60 | 6,17E-03 |
| ENSDARG00000060103  | cpeb3             | 245     | 35     | -2,60 | 3,71E-04 |
| ENSDARG00000069995  | dpy19l1l          | 357     | 50     | -2,61 | 5,03E-04 |
| ENSDARG00000032849  | ndrg1a            | 1493    | 207    | -2,62 | 4,34E-04 |
| ENSDARG00000071009  | kif20ba           | 359     | 46     | -2,62 | 2,31E-03 |
| ENSDARG00000103903  | LO017650.1        | 60      | 7      | -2,64 | 1,19E-02 |
| ENSDARG00000045979  | zgc:153704        | 225     | 32     | -2,64 | 2,29E-04 |
| ENSDARG00000100529  | sh3bp5a           | 297     | 40     | -2,64 | 5,57E-04 |
| ENSDARG00000008723  | prkcba            | 42      | 4      | -2,64 | 3,67E-02 |
| ENSDARG00000099732  | gfra1a            | 4513    | 472    | -2,64 | 1,49E-02 |
| ENSDARG00000101471  | fgd4a             | 664     | 82     | -2,64 | 2,29E-03 |
| ENSDARG000000007398 | lrrk1             | 1018    | 133    | -2,65 | 1,20E-03 |
| ENSDARG00000101508  | nr6a1a            | 122     | 14     | -2,66 | 4,66E-03 |
| ENSDARG00000074915  | etaa1             | 249     | 31     | -2,66 | 8,47E-04 |
| ENSDARG00000098641  | nbeal2            | 395     | 53     | -2,66 | 4,89E-04 |
| ENSDARG00000099708  | cacna1hb          | 20      | 0      | -2,66 | 1,90E-02 |
| ENSDARG00000078145  | si:ch211-218g4.2  | 544     | 69     | -2,66 | 1,18E-03 |
| ENSDARG00000115504  | CABZ01080056.1    | 19      | 1      | -2,67 | 2,75E-02 |
| ENSDARG00000099038  | kcng1             | 100     | 10     | -2,67 | 1,31E-02 |
| ENSDARG00000063158  | CABZ01081780.1    | 256     | 31     | -2,68 | 1,42E-03 |
| ENSDARG00000059340  | dlgap2a           | 233     | 32     | -2,69 | 1,36E-04 |
| ENSDARG00000062712  | tmem264           | 39      | 4      | -2,69 | 3,26E-02 |
| ENSDARG00000055305  | ret               | 10653   | 1498   | -2,70 | 2,18E-05 |
| ENSDARG00000021305  | slc30a2           | 1650    | 214    | -2,70 | 3,84E-04 |
| ENSDARG00000091277  | adra2da           | 675     | 81     | -2,70 | 2,02E-03 |
| ENSDARG00000070522  | cacna1i           | 575     | 74     | -2,70 | 5,42E-04 |
| ENSDARG00000009693  | llgl1             | 207     | 27     | -2,71 | 2,49E-04 |
| ENSDARG00000016551  | iqsec1b           | 1087    | 153    | -2,71 | 6,22E-06 |
| ENSDARG00000076697  | zmp:0000001168    | 86      | 9      | -2,71 | 1,40E-02 |
| ENSDARG00000058585  | chst2b            | 55      | 6      | -2,72 | 5,16E-03 |
| ENSDARG00000055075  | svila             | 385     | 44     | -2,72 | 2,00E-03 |
| ENSDARG00000062864  | gk5               | 176     | 22     | -2,72 | 8,47E-04 |
| ENSDARG00000025299  | tspan9a           | 185     | 21     | -2,73 | 3,00E-03 |
| ENSDARG00000069946  | itga6b            | 4400    | 521    | -2,74 | 1,24E-03 |
| ENSDARG00000025108  | magixa            | 138     | 15     | -2,74 | 3,70E-03 |
| ENSDARG00000078733  | cnnm2b            | 140     | 15     | -2,75 | 2,29E-03 |
| ENSDARG00000105040  | fam69c            | 650     | 77     | -2,75 | 8,58E-04 |
| ENSDARG00000040799  | sst1.1            | 5248275 | 438229 | -2,76 | 1,26E-02 |
| ENSDARG00000106473  | CABZ01076968.1    | 174     | 22     | -2,76 | 1,99E-04 |
| ENSDARG00000038981  | zgc:153615        | 402     | 47     | -2,76 | 8,06E-04 |
| ENSDARG00000026979  | krt1-c5           | 23      | 2      | -2,77 | 3,88E-02 |
| ENSDARG00000021494  | hnf4a             | 316     | 40     | -2,77 | 1,07E-04 |
| ENSDARG00000031777  | pparaa            | 139     | 15     | -2,78 | 1,67E-03 |
| ENSDARG00000004377  | ppp1r13ba         | 1658    | 175    | -2,78 | 2,98E-03 |
| ENSDARG00000102279  | zmiz1b            | 499     | 54     | -2,79 | 2,39E-03 |
| ENSDARG00000090164  | si:ch73-362m14.2  | 225     | 21     | -2,79 | 9,13E-03 |
| ENSDARG00000055843  | cdh10a            | 1800    | 169    | -2,79 | 2,36E-02 |
| ENSDARG00000056922  | ltbp1             | 168     | 18     | -2,79 | 2,50E-03 |
| ENSDARG00000043843  | akap7             | 45      | 4      | -2,80 | 1,05E-02 |
| ENSDARG00000018817  | bdnf              | 1758    | 189    | -2,80 | 1,87E-03 |
| ENSDARG00000010712  | npffr1l3          | 1488    | 180    | -2,80 | 3,29E-04 |
| ENSDARG00000006832  | galnt9            | 100     | 10     | -2,80 | 5,86E-03 |
| ENSDARG00000015476  | iqch              | 39      | 2      | -2,80 | 4,16E-02 |
| ENSDARG00000020080  | ek1               | 1744    | 189    | -2,80 | 1,34E-03 |

|                     |                   |       |      |       |          |
|---------------------|-------------------|-------|------|-------|----------|
| ENSDARG00000095458  | si:dkey-240h12.3  | 328   | 36   | -2,81 | 1,16E-03 |
| ENSDARG00000027602  | lrfn1             | 123   | 13   | -2,81 | 1,53E-03 |
| ENSDARG00000111945  | CABZ01069040.1    | 245   | 21   | -2,82 | 4,62E-03 |
| ENSDARG00000102335  | ano1              | 218   | 18   | -2,82 | 1,30E-02 |
| ENSDARG00000075793  | prex1             | 195   | 22   | -2,83 | 6,34E-04 |
| ENSDARG00000075159  | meltf             | 156   | 7    | -2,83 | 1,73E-02 |
| ENSDARG00000101095  | cpne4a            | 3891  | 403  | -2,83 | 1,99E-03 |
| ENSDARG00000073883  | clstn3            | 2585  | 305  | -2,84 | 1,63E-04 |
| ENSDARG00000069692  | col7a1l           | 117   | 12   | -2,84 | 2,08E-03 |
| ENSDARG00000036036  | mdka              | 265   | 26   | -2,84 | 2,93E-03 |
| ENSDARG00000101054  | syn2b             | 40    | 2    | -2,84 | 3,21E-02 |
| ENSDARG00000102336  | FQ377903.2        | 34    | 0    | -2,84 | 8,57E-03 |
| ENSDARG00000111701  | LT631684.2        | 278   | 33   | -2,85 | 1,13E-04 |
| ENSDARG00000062687  | kcnh7             | 275   | 30   | -2,85 | 6,67E-04 |
| ENSDARG00000103295  | cyp3a65           | 4761  | 479  | -2,85 | 2,28E-03 |
| ENSDARG00000096603  | bmb               | 47    | 4    | -2,86 | 1,37E-03 |
| ENSDARG00000115070  | si:dkeyp-74b6.2   | 156   | 15   | -2,87 | 1,17E-03 |
| ENSDARG00000104315  | fhl3b             | 84    | 6    | -2,87 | 7,47E-03 |
| ENSDARG00000074004  | stac              | 37    | 2    | -2,88 | 3,36E-02 |
| ENSDARG00000069698  | lrguk             | 1247  | 133  | -2,88 | 8,67E-04 |
| ENSDARG00000055874  | cpe               | 38713 | 4901 | -2,89 | 1,01E-07 |
| ENSDARG00000103576  | LO016987.1        | 300   | 29   | -2,89 | 2,31E-03 |
| ENSDARG00000054786  | faah2b            | 51    | 5    | -2,89 | 4,11E-03 |
| ENSDARG00000023537  | ahr1b             | 287   | 32   | -2,89 | 2,90E-04 |
| ENSDARG00000100019  | arhgap11a         | 40    | 3    | -2,89 | 1,74E-02 |
| ENSDARG00000073963  | si:ch211-258f14.2 | 78    | 4    | -2,91 | 7,21E-03 |
| ENSDARG00000100739  | CABZ01052573.1    | 23    | 1    | -2,92 | 2,53E-02 |
| ENSDARG00000059680  | fscn1a            | 518   | 58   | -2,92 | 1,07E-04 |
| ENSDARG00000069134  | vwc2l             | 39    | 3    | -2,93 | 5,86E-03 |
| ENSDARG00000036968  | si:ch1073-416d2.3 | 1069  | 103  | -2,93 | 1,12E-03 |
| ENSDARG000000003991 | fhl2b             | 104   | 5    | -2,93 | 2,58E-02 |
| ENSDARG00000002937  | meis1a            | 6382  | 720  | -2,94 | 4,75E-05 |
| ENSDARG00000089292  | adgrl1a           | 206   | 23   | -2,94 | 1,53E-04 |
| ENSDARG00000079166  | ace               | 3673  | 335  | -2,96 | 1,61E-03 |
| ENSDARG00000004451  | tnfrsfa           | 131   | 12   | -2,97 | 7,92E-04 |
| ENSDARG00000027903  | adamtsl3          | 188   | 17   | -3,00 | 8,47E-04 |
| ENSDARG000000042545 | sema3ga           | 147   | 16   | -3,00 | 5,87E-05 |
| ENSDARG00000098810  | zgc:194678        | 756   | 80   | -3,00 | 7,67E-05 |
| ENSDARG00000031763  | smad6b            | 348   | 37   | -3,00 | 4,89E-05 |
| ENSDARG00000104054  | mxipl             | 3048  | 320  | -3,00 | 9,27E-05 |
| ENSDARG00000113674  | CABZ01058222.1    | 457   | 41   | -3,01 | 1,41E-03 |
| ENSDARG00000058115  | fgfr2             | 269   | 25   | -3,01 | 6,14E-04 |
| ENSDARG00000074082  | CU467828.1        | 56    | 4    | -3,02 | 2,14E-02 |
| ENSDARG00000059951  | pld6              | 22    | 1    | -3,03 | 3,25E-02 |
| ENSDARG00000073752  | CACNA2D1          | 55    | 3    | -3,03 | 1,58E-02 |
| ENSDARG00000077134  | gpr158a           | 1351  | 137  | -3,03 | 1,07E-04 |
| ENSDARG00000086665  | si:dkey-175g6.2   | 716   | 46   | -3,04 | 2,78E-03 |
| ENSDARG000000056633 | fgf13b            | 123   | 10   | -3,05 | 7,63E-04 |
| ENSDARG00000017579  | si:ch211-195b15.7 | 23    | 2    | -3,06 | 1,16E-02 |
| ENSDARG00000052405  | pak6b             | 134   | 11   | -3,06 | 2,83E-03 |
| ENSDARG00000099101  | gch2              | 1019  | 49   | -3,07 | 2,78E-03 |
| ENSDARG00000076404  | mctp1a            | 94    | 8    | -3,07 | 1,72E-03 |
| ENSDARG00000078335  | amot              | 154   | 9    | -3,08 | 6,95E-03 |
| ENSDARG000000013522 | pck1              | 217   | 4    | -3,09 | 7,71E-03 |
| ENSDARG00000032630  | neb               | 48    | 2    | -3,09 | 1,78E-02 |
| ENSDARG00000090889  | si:ch211-132p1.3  | 650   | 35   | -3,10 | 5,80E-03 |
| ENSDARG00000102340  | ptn               | 15430 | 1455 | -3,10 | 1,29E-04 |
| ENSDARG00000103359  | slitrk5a          | 49    | 2    | -3,10 | 4,32E-03 |
| ENSDARG00000078322  | col12a1a          | 144   | 9    | -3,11 | 6,37E-03 |
| ENSDARG000000040466 | vil1              | 537   | 49   | -3,13 | 2,29E-04 |
| ENSDARG00000091061  | slc38a3b          | 612   | 51   | -3,13 | 4,19E-04 |
| ENSDARG00000058996  | jam2a             | 29    | 1    | -3,16 | 2,08E-02 |
| ENSDARG00000029431  | si:ch211-147k10.5 | 31    | 1    | -3,16 | 1,11E-02 |
| ENSDARG00000079907  | ptger4c           | 147   | 1    | -3,17 | 2,58E-03 |
| ENSDARG00000089640  | si:dkey-117n7.5   | 39    | 2    | -3,17 | 2,49E-03 |
| ENSDARG000000002533 | adora2b           | 100   | 5    | -3,17 | 2,73E-03 |
| ENSDARG00000086746  | prodha            | 2376  | 213  | -3,17 | 9,63E-05 |
| ENSDARG00000036414  | si:ch73-335l21.1  | 514   | 46   | -3,18 | 1,07E-04 |
| ENSDARG00000116442  | FAM46A            | 987   | 84   | -3,19 | 1,86E-04 |
| ENSDARG00000044808  | slc4a4b           | 214   | 16   | -3,19 | 1,10E-03 |
| ENSDARG00000100772  | si:ch211-154c21.1 | 26    | 1    | -3,19 | 1,01E-02 |
| ENSDARG000000088593 | chst1             | 115   | 9    | -3,20 | 3,80E-04 |
| ENSDARG00000036483  | c1ql3b            | 48    | 1    | -3,20 | 4,58E-03 |

|                      |                  |        |      |       |          |
|----------------------|------------------|--------|------|-------|----------|
| ENSDARG00000019541   | gpt2l            | 9696   | 853  | -3,21 | 5,87E-05 |
| ENSDARG000000087646  | runx1            | 55     | 1    | -3,21 | 6,23E-03 |
| ENSDARG000000045878  | nudt4b           | 277    | 23   | -3,21 | 2,19E-04 |
| ENSDARG000000015110  | slc18a2          | 1857   | 151  | -3,22 | 2,17E-04 |
| ENSDARG000000090624  | ADGRL3           | 789    | 59   | -3,23 | 6,53E-04 |
| ENSDARG000000075956  | faxca            | 348    | 29   | -3,24 | 1,34E-04 |
| ENSDARG000000098925  | prdm1b           | 66     | 4    | -3,24 | 1,48E-03 |
| ENSDARG0000000069254 | chrn4a           | 2516   | 181  | -3,26 | 9,30E-04 |
| ENSDARG000000099729  | pcdh10a          | 10502  | 886  | -3,27 | 5,70E-05 |
| ENSDARG000000115315  | CU633857.1       | 23     | 1    | -3,28 | 1,21E-02 |
| ENSDARG000000007436  | avpr2aa          | 2385   | 165  | -3,29 | 7,67E-04 |
| ENSDARG000000103747  | cav1             | 771    | 60   | -3,29 | 1,34E-04 |
| ENSDARG0000000013721 | g6pca.2          | 90     | 6    | -3,31 | 6,82E-04 |
| ENSDARG000000099979  | tgfbr3           | 125    | 8    | -3,32 | 1,48E-03 |
| ENSDARG000000024865  | dscama           | 4213   | 337  | -3,32 | 6,58E-05 |
| ENSDARG000000114823  | LO018148.1       | 42     | 1    | -3,32 | 4,75E-03 |
| ENSDARG000000067781  | urp2             | 822    | 42   | -3,33 | 3,76E-03 |
| ENSDARG000000053487  | osbp2            | 543    | 45   | -3,34 | 6,76E-06 |
| ENSDARG0000000002600 | pcsk1            | 38882  | 3275 | -3,35 | 4,48E-06 |
| ENSDARG000000091073  | alkal2a          | 83     | 4    | -3,36 | 3,06E-03 |
| ENSDARG000000011171  | si:ch211-12m10.1 | 213    | 14   | -3,37 | 6,63E-04 |
| ENSDARG000000109715  | sncgb            | 393    | 27   | -3,37 | 2,29E-04 |
| ENSDARG000000089107  | mlxipl           | 1604   | 118  | -3,38 | 9,98E-05 |
| ENSDARG000000090883  | gabra3           | 365    | 27   | -3,38 | 1,14E-04 |
| ENSDARG0000000042646 | zgc:77784        | 202    | 13   | -3,39 | 5,99E-04 |
| ENSDARG000000105281  | p2ry1            | 66     | 1    | -3,40 | 1,10E-02 |
| ENSDARG000000112637  | ANOS1            | 122    | 7    | -3,40 | 9,71E-04 |
| ENSDARG0000000029493 | f9b              | 27     | 0    | -3,42 | 1,22E-02 |
| ENSDARG000000021866  | upk1a            | 808    | 52   | -3,44 | 3,28E-04 |
| ENSDARG000000074329  | arvcfa           | 262    | 10   | -3,47 | 2,31E-03 |
| ENSDARG0000000102180 | shroom3          | 500    | 36   | -3,49 | 2,24E-05 |
| ENSDARG000000023316  | sim1a            | 1242   | 77   | -3,52 | 1,14E-04 |
| ENSDARG000000043323  | lnx1             | 111    | 7    | -3,54 | 2,23E-04 |
| ENSDARG000000074443  | gas7a            | 336    | 17   | -3,57 | 4,52E-04 |
| ENSDARG000000062447  | hecw2a           | 119    | 6    | -3,58 | 3,38E-04 |
| ENSDARG000000004227  | pde3a            | 897    | 54   | -3,59 | 9,50E-05 |
| ENSDARG0000000062277 | ppp2r2cb         | 44     | 1    | -3,62 | 6,70E-03 |
| ENSDARG000000079581  | nyap2a           | 105    | 5    | -3,65 | 5,93E-04 |
| ENSDARG000000055123  | kcnk2a           | 72     | 3    | -3,69 | 2,82E-03 |
| ENSDARG000000055373  | sema3fb          | 33     | 0    | -3,74 | 8,16E-03 |
| ENSDARG000000042816  | mmp9             | 502    | 24   | -3,74 | 1,22E-04 |
| ENSDARG000000056080  | si:dkey-191g9.5  | 113    | 3    | -3,74 | 1,84E-03 |
| ENSDARG0000000077367 | ntng2a           | 311    | 13   | -3,78 | 4,73E-04 |
| ENSDARG000000077761  | nlgn4b           | 183    | 7    | -3,79 | 3,59E-04 |
| ENSDARG000000032482  | si:dkey-40c11.2  | 185    | 9    | -3,80 | 1,29E-04 |
| ENSDARG000000109233  | bmp10l           | 32     | 0    | -3,84 | 3,56E-03 |
| ENSDARG000000101641  | trpm2            | 845    | 34   | -3,85 | 2,34E-04 |
| ENSDARG0000000020289 | pif1             | 117    | 2    | -3,87 | 1,00E-03 |
| ENSDARG000000060025  | nsmfa            | 44     | 1    | -3,88 | 2,05E-03 |
| ENSDARG000000093453  | ahdc1            | 43     | 1    | -3,89 | 1,37E-02 |
| ENSDARG000000099446  | slit1b           | 213    | 1    | -3,89 | 3,01E-03 |
| ENSDARG000000077818  | nrg2a            | 24     | 0    | -3,92 | 2,57E-03 |
| ENSDARG000000075352  | brinp3b          | 41     | 0    | -3,97 | 2,00E-02 |
| ENSDARG0000000087241 | ucn3l            | 2686   | 81   | -4,00 | 1,50E-04 |
| ENSDARG000000014420  | elavl3           | 198    | 5    | -4,07 | 4,97E-04 |
| ENSDARG000000018066  | ptchd1           | 116    | 4    | -4,09 | 4,41E-05 |
| ENSDARG000000098161  | cntn4            | 314    | 4    | -4,10 | 4,88E-04 |
| ENSDARG000000055459  | dlgap3           | 91     | 3    | -4,15 | 6,20E-04 |
| ENSDARG000000090686  | slc35f2l         | 59     | 1    | -4,15 | 9,30E-04 |
| ENSDARG0000000019451 | pcsk2            | 132972 | 4229 | -4,31 | 2,36E-05 |
| ENSDARG000000035198  | gcnt4a           | 199    | 2    | -4,34 | 3,42E-04 |
| ENSDARG000000045265  | gsg1l2b          | 565    | 17   | -4,40 | 1,35E-05 |
| ENSDARG000000012968  | rhoub            | 131    | 2    | -4,40 | 2,05E-04 |
| ENSDARG000000098240  | meis2a           | 474    | 2    | -4,42 | 1,86E-04 |
| ENSDARG000000095788  | ghrhl            | 154    | 2    | -4,49 | 6,52E-04 |
| ENSDARG0000000040261 | runx2a           | 79     | 0    | -4,70 | 8,47E-04 |
| ENSDARG000000076351  | brinp3a.1        | 373    | 8    | -4,72 | 4,41E-05 |
| ENSDARG000000011797  | fam46bb          | 317    | 4    | -5,12 | 4,75E-05 |
| ENSDARG000000105113  | galr2b           | 333    | 0    | -5,14 | 4,73E-04 |
| ENSDARG000000009014  | col11a1b         | 529    | 4    | -5,46 | 2,08E-05 |
| ENSDARG000000013607  | sema3gb          | 433    | 2    | -5,85 | 2,08E-05 |
