# Supplementary material for: A δ-cell subpopulation with a pro-β-cell identity contributes to efficient age-independent recovery in a zebrafish model of diabetes
Source: eLife journal article supplement (doi:10.7554/elife.67576), 2022-01-21
Supplement: supp [file elife-67576-supp-v1.zip › elife_poa_e67576_Figure_5_source_data_2.pdf]

**Figure 5-Source Data 2**

**Overlap between genes overexpressed in GFPhigh and beta-cell markers**

**Overlap between genes overexpressed in GFPlow and sst2 delta-cell markers**

**184 "sst2 delta cell markers"  
from Tarifeño-Saldivia 2017**

sst2  
sst1.2  
ghrl  
kctd12.2  
map2k6  
zgc:195023  
aebp1  
amd1  
ppp1caa  
anxa11a  
mapk14a  
pitpnaa  
oaz2a  
ckbb  
ptger1b  
slc7a7  
cldni  
map3k15  
nmba  
carhsp1  
stmn1b  
kcnk3b  
map1ab  
slc26a3.2  
marcksl1b  
si:ch211-195b15.8  
atp1a1b  
kl  
fabp6  
gudp1b  
olfm2a  
serpini1  
LO018309.1  
mdkb  
TMEM179 (1 of many)  
HHEX  
CABZ01079192.1  
lamc2  
stxbp6  
cpamd8  
cdx1b  
slmapb  
mrp2a  
tbx2b  
spegb  
srd5a2b  
si:dkey-206p8.1  
nacc2  
edil3a  
sema3fa  
hopx  
nrcama  
ncf1  
nrp2a  
fgfr1a  
phkg2  
slc7a14a  
si:dkey-85k7.7

**142 common genes between  
"GFPlow" and "sst2 delta markers"**

mapk14a  
lamb2  
ppp1caa  
slc26a3.2  
pfas  
stom  
adgb  
npy8br  
tbx2b  
nrcama  
hmx4  
itga11b  
ank2a  
spegb  
si:ch73-265h17.1  
fgfr1a  
sema3fa  
col2a1b  
ak5  
map3k15  
sst2  
arl3l2  
ddc  
mmp2  
sp7  
atp1a1b  
si:ch211-254n4.3  
mdkb  
slmapb  
adgrv1  
cdh11  
map1ab  
adra1d  
fgf12a  
prkg1b  
rxfp2a  
nrp2a  
sst1.2  
zgc:100906  
stmn1b  
ncf1  
serpini1  
marcksl1b  
si:dkeyp-92c9.2  
anks4b  
plxnb2b  
casz1  
rab30  
pald1b  
pitpnaa  
GALNTL6  
adarb1a  
slc8a1b  
amd1  
lox12a  
sall4  
fabp6  
myo7ab

**36 common genes between "GFPhigh"  
and "beta cell markers"**

wif1  
srpx  
fgfr1b  
g6pcb  
kcnj2a  
prkcbb  
grapb  
dpp6b  
grin2bb  
ppdpfb  
plxnb3  
nkx3.2  
runx2a  
ca7  
ca12  
rrad  
tmtc1  
zgc:154058  
arvcfa  
prkdc  
klb  
iqsec2b  
nlgn4b  
CSMD3 (1 of many)  
ace  
man2c1  
tmem163a  
ucn3l  
si:ch211-242f23.3  
cntn4  
gabbr4  
pcdh10a  
zgc:158260  
CABZ01085139.1  
LO017650.1  
hcn1

cdh11  
maptb  
lamb2  
si:dkey-85k7.7  
zgc:100906  
si:dkey-280e21.3  
lox12a  
adra1d  
prkg1b  
tshz3a  
srpx2  
rxfp2a  
napbb  
pygma  
pfas  
yjefn3  
stom  
npy8br  
DUT  
ddc  
nhsb  
tmcc3  
ak5  
wnk4b  
rab30  
ank2a  
ca6  
kcnt1  
arl3l2  
gpr4  
irs1  
ifitm5  
mertka  
mmp2  
syt10  
sgcd  
chgb  
CABZ01088484.1  
znf1003  
plppr5a  
tub  
si:dkey-166d12.2  
myo7ab  
nr0b1  
adcyap1r1a  
adgrv1  
bmp7b  
CU019662.1  
hmx4  
slc8a1b  
lrrc39  
prss23  
lmf2a  
itga11b  
si:ch211-152p11.4  
hpcal4  
ttc6  
pear1  
GALNTL6  
reep6  
axdnd1  
cavin1b  
bahcc1b  
lrrc7  
col2a1b  
trpc5b  
si:dkey-118k5.3

tmcc3  
cntn1b  
kcnk3b  
zgc:195023  
carhsp1  
si:dkey-166d12.2  
kctd12.2  
irs1  
phkg2  
ghrl  
cldni  
slc7a7  
pknox2  
pygma  
celsr3  
ca6  
si:dkey-280e21.3  
cpamd8  
LO018309.1  
stoml3b  
plppr5a  
gulp1b  
cavin1b  
CU019662.1  
si:ch211-216b21.2  
pear1  
trpc5b  
yjefn3  
bmp7b  
syngap1a  
nmba  
lamc2  
napbb  
slc26a4  
si:ch211-168d1.3  
hpcal4  
lrrc39  
tgfb2l  
cntnap5l  
mertka  
mrap2a  
chgb  
anxa11a  
lypd6b  
pdgfd  
olfm2a  
lmf2a  
pacs2  
kcnt1  
si:ch211-152p11.4  
kl  
nhsb  
bahcc1b  
reep6  
tshz3a  
maptb  
FAT3 (1 of many)  
si:dkey-118k5.3  
stxbp6  
wnk4b  
hopx  
TMEM179 (1 of many)  
fam20cb  
aebp1  
zmat4a  
edil3a  
artnb

si:ch211-286o17.1  
cntnap5l  
col14a1a  
casz1  
FAM135B  
anks4b  
stoml3b  
fgf12a  
adarb1a  
chrbn4  
si:ch211-254n4.3  
syne1b  
celsr3  
artnb  
casp8l1  
evla  
si:ch211-216b21.2  
lrrc4.1  
pkd1l2b  
si:ch211-186e20.7  
pacs2  
bmp4  
plxnb2b  
slc26a4  
ino80e  
lypd6b  
pdgfd  
tox2  
alx3  
ppp4r1l  
si:ch211-168d1.3  
ano2  
fam20cb  
cep152  
arrb1  
cntn1b  
sall4  
capn10  
tgfb2l  
fkbp10a  
pknox2  
adgb  
zgc:158328  
si:ch211-150i13.1  
col4a4  
nadl1.2  
ntn2  
FAT3 (1 of many)  
sp7  
si:dkeyp-106c3.1  
adrb2a  
pald1b  
syngap1a  
zmat4a  
si:dkeyp-92c9.2  
sdk1b  
CABZ01043499.1  
si:ch73-265h17.1  
RASGRP2

si:ch211-195b15.8  
si:dkeyp-206p8.1  
sgcd  
fkbp10a  
map2k6  
ppp4r1l  
tox2  
si:ch211-286o17.1  
si:dkeyp-85k7.7  
ano2  
CABZ01079192.1  
chrbn4  
ttc6  
CABZ01088484.1  
ptger1b  
ifitm5  
cdx1b
