# Supplementary material for: A δ-cell subpopulation with a pro-β-cell identity contributes to efficient age-independent recovery in a zebrafish model of diabetes
Source: eLife journal article supplement (doi:10.7554/elife.67576), 2022-01-21
Supplement: supp [file elife-67576-supp-v1.zip › elife_poa_e67576_Figure_5_source_data_3.pdf]

Figure 5-Source Data 3. sst1.1  $\delta$ -cell (GFPhigh) and updated  $\beta$ -cell markers

Gene expression enrichment >4-fold

**sst1.1 delta cell markers enriched >4x versus alpha, beta and sst2 delta cells (from Tarifeño-Saldivia 2017)**

sst1.1  
FO704772.2  
mfge8b  
cyp3a65  
itga6b  
gfra1a  
cpne4a  
ca4a  
ace  
ucn3l  
c9  
chrm4a  
avpr2aa  
bdnf  
cdh10a  
mst1rb  
ppp1r13ba  
mtbl  
lrguk  
boc  
atp2a2a  
cacna1bb  
iqsec1b  
insl5b  
lrrk1  
urp2  
dlc  
mtus1b  
dnajc6  
upk1a  
nrp1b  
ADGRL3  
sez6b  
pcsk6  
arhgap32b  
adra2da  
slc38a3b  
slc4a7  
xytl1  
l1cama  
ephb2b  
syt7a  
dgat2  
slit1a  
igf1ra  
sik3  
mc4r  
col11a1b  
si:ch211-153b23.5  
slc34a1a  
si:ch211-207i1.2  
rxfp3.3a1  
si:ch211-264f5.6  
arhgap42b  
sema3gb  
vav3b  
gabra3  
cdk15  
KCNIP4  
si:dkey-240h12.3  
comtb  
klf3  
faxca  
kif20ba  
GSK3B (1 of many)  
brinp3a.1  
ntng2a  
asip2b  
nudt4b  
mdka  
galr2b  
shank2

**updated beta cell markers enriched >4x versus alpha, sst1.1 delta and sst2 delta cells**

ins  
nkx6.2  
fstl1a  
esr1  
zgc:158654  
gcgra  
abhd15a  
ngfra  
otc  
srpx  
fstl1b  
rab3c  
cacng3b  
pnocb  
si:ch211-246m6.5  
ndufa4l2a  
si:ch211-236d3.4  
chrm5a  
rasd4  
si:ch211-246m6.5  
ppox  
colgalt2  
clstn2  
raly  
efnb3b  
adra2b  
si:ch211-260e23.9  
aplnra  
iqsec2b  
zgc:91818  
tmem196b  
zgc:162160  
itga9  
rnd1b  
rasa4  
twist1b  
cabp5a  
nostrin  
rhbdf1b  
elf3  
eif4ebp3l  
grip2b  
olfml2ba  
ptprt  
cacng5b  
tagln3b  
thbs3a  
angptl1a  
AL935128.1  
panx1b  
cart3  
sdsi  
CABZ01072077.1  
CABZ01020840.1  
elfn1b  
gypc  
mthfd1l  
gstt1b  
slc6a15  
rorcb

gpbar1  
CABZ01063170.1  
cpeb3  
vstm2l  
cpne7  
gas2l3  
ptprsa  
dhrrs7ca  
zgc:77784  
slc4a4b  
ano1  
elavl3  
cacnb2b  
slit1b  
gk5  
dgkzb  
ptger4c  
ano5a  
VSTM2A  
slc8a4a  
mbd5  
ghrhl  
si:ch1073-391i24.1  
ltbp1  
kif26aa  
phf24  
amot  
col7a1l  
abxn7l1  
sox9a  
lrfn1  
tnfrsfa  
si:dkey-63b1.1  
alkal2a  
nr6a1a  
larp1  
pif1  
myl7  
hecw2a  
lnx1  
adora2b  
adam10b  
st8sia3  
ptch1  
hey2  
crlf1a  
plxna2  
kif1c  
hs3st2  
fam20ca  
si:dkey-191g9.5  
scospondin  
nyap2a  
avpr2ab  
CABZ01075125.1  
b3gnt7  
omgb  
dlgap3  
lrp6  
BACE1  
zmp:0000001168  
col11a1a  
prdm1b  
znf710a  
si:ch73-72b7.1  
si:ch211-129o18.4  
kcnk2a  
p2ry1  
BX548011.1  
runx1  
ptch2  
crybb1l2  
atn1  
cplx1  
fam167b  
stard9  
ntrk1  
CU467828.1  
CR388166.1  
si:ch211-119o8.4
