# Supplementary material for: A δ-cell subpopulation with a pro-β-cell identity contributes to efficient age-independent recovery in a zebrafish model of diabetes
Source: eLife journal article supplement (doi:10.7554/elife.67576), 2022-01-21
Supplement: supp [file elife-67576-supp-v1.zip › elife_poa_e67576_Figure_5_source_data_4.pdf]

**Figure 5-Source Data 4. Biological processes and pathways overrepresented in GFPlow**

GO identified by WebGestalt (FDR<0.25)  
among genes overexpressed in sst1.1:GFPlow (versus sst1.1:GFPhigh delta cells) (DESeq FC>2x, Padj<0.05)

| Biological Process (non redundant) |                                                         |                 |             |             |                                                                                                                                                                                                                                                                                                                                      |
|------------------------------------|---------------------------------------------------------|-----------------|-------------|-------------|--------------------------------------------------------------------------------------------------------------------------------------------------------------------------------------------------------------------------------------------------------------------------------------------------------------------------------------|
| geneSet                            | description                                             | enrichmentRatio | pValue      | FDR         | userId                                                                                                                                                                                                                                                                                                                               |
| GO:0030182                         | neuron differentiation                                  | 1,753845509     | 5,91E-05    | 0,016775464 | mapk14a;isl1;casp9;tbx2b;skib;sema3fa;slc26a2;twf1b;glra1;eya4;arl3l2;mdkb;cdh11;fzd3a;tnc;map1ab;ntn1b;zgc:110006;stmn1b;slit3;rab13;ctdsp2;pls3;lfng;pitpnaa;atg4da;cdk5r1b;id4;hgfa;sema4e;kctd12.2;prox1a;kif17;id2a;alcamb;sema5a;ngfa;wnt9a;wnt7bb;wnt6b;cerkl;rbpms2b;sema4c;dscaml1;slitrk6;wnt5b;vegfaa;ndrg4;efnb3a;lrrc4c |
| GO:0032989                         | cellular component morphogenesis                        | 1,731943829     | 3,08E-04    | 0,043695496 | mapk14a;isl1;casp9;sema3fa;arl3l2;flncb;parvb;rhoj;rhoca;cdh11;fzd3a;tnc;map1ab;ntn1b;cdc42se1;rilpl2;adgrg1;slit3;pls3;pitpnaa;parvaa;sema4e;kctd12.2;prox1a;alcamb;sema5a;ngfa;rnd2;lrrc39;col6a1;rbpms2b;sema4c;rac3a;dscaml1;slitrk6;wnt5b;rbm24a;vegfaa;wtip;cap2;efnb3a;lrrc4c                                                 |
| GO:0051093                         | negative regulation of developmental process            | 2,415295815     | 5,94E-04    | 0,0561947   | skib;fgfr1a;sema3fa;sirt2;tnc;slit3;lfng;loxl2a;id4;irf7;sema4e;id2a;her9;sema5a;yjefn3;rspo3;sema4c                                                                                                                                                                                                                                 |
| GO:0040011                         | locomotion                                              | 1,561697294     | 0,001533786 | 0,07380697  | tbx2b;cass4;srgap1a;sema3fa;sst2;arl3l2;ptges;rhoca;cdh11;fzd3a;tnc;ntn1b;hmgbl1b;podxl;sst1.2;rab13;arpc5lb;znf703;pls3;socs1a;ptk2bb;jagn1a;cftr;loxl2a;anxa3b;hgfa;sema4e;prox1a;ackr3b;alcamb;sema5a;rxfp3.3b;srgap3;elp6;rnd2;cxcl20;cxcr3.1;rbpms2b;sema4c;rac3a;ccl20b;dscaml1;foxj1a;wnt5b;vegfaa;efnb3a                     |
| GO:0045595                         | regulation of cell differentiation                      | 1,734058534     | 0,00155598  | 0,07380697  | mapk14a;casp9;skib;ndrg1b;fgfr1a;sema3fa;sirt2;twf1b;glra1;arl3l2;mdkb;tnc;ntn1b;adgrg1;zgc:110006;slit3;atoh8;lfng;jun;loxl2a;id4;irf7;sema4e;kctd12.2;id2a;her9;sema5a;ngfa;rbpms2b;sema4c;rbm24a;lrrc4c                                                                                                                           |
| GO:0120036                         | plasma membrane bounded cell projection organization    | 1,568697282     | 0,00157548  | 0,07380697  | mapk14a;isl1;casp9;ttc9c;ehd3;aif1;sema3fa;sirt2;twf1b;ak5;arl3l2;flncb;cdh11;fzd3a;tnc;map1ab;ntn1b;rilpl2;zgc:110006;stmn1b;slit3;rab13;znf703;hs3st1l2;pls3;dnai1.2;pitpnaa;sema4e;kctd12.2;alcamb;sema5a;ngfa;dzip1l;tmem67;rbpms2b;sema4c;cep162;dscaml1;slitrk6;foxj1a;eps8l3a;vegfaa;wtip;efnb3a;lrrc4c                       |
| GO:0009719                         | response to endogenous stimulus                         | 1,70101626      | 0,001819186 | 0,07380697  | thraa;crhr1;rxrgb;skib;fgfr1a;glra1;sesn1;dynlrb1;rxfp2a;esr2b;rab13;paqr7b;sfrp1a;znf703;opr1b;socs1a;opr1j;jun;anxa3b;agtr1b;prlr;irs1;dup22a;ngfa;bmp7b;ar;chrn3a;inpp5kb;kl;fgf20b;paqr8;igfbp3;bambib                                                                                                                           |
| GO:0051241                         | negative regulation of multicellular organismal process | 2,217320748     | 0,002139146 | 0,075939694 | fgfr1a;sema3fa;sirt2;tnc;slit3;lfng;loxl2a;id4;irf7;sema4e;id2a;her9;sema5a;yjefn3;rspo3;sema4c                                                                                                                                                                                                                                      |
| GO:0021675                         | nerve development                                       | 3,145501527     | 0,003271022 | 0,100946806 | tuba1a;fgfr1a;tnc;adgrg1;klf7b;alcamb;ngfa;chn1                                                                                                                                                                                                                                                                                      |
| GO:0022603                         | regulation of anatomical structure morphogenesis        | 1,737485527     | 0,004055252 | 0,100946806 | mapk14a;casp9;fgfr1a;sema3fa;sirt2;arl3l2;rhoj;rhoca;tnc;ntn1b;cdc42se1;slit3;ptk2bb;sema4e;kctd12.2;id2a;sema5a;yjefn3;rspo3;rnd2;rbpms2b;sema4c;rbm24a;vegfaa;wtip;lrrc4c                                                                                                                                                          |
| GO:0051674                         | localization of cell                                    | 1,555614254     | 0,004139596 | 0,100946806 | tbx2b;cass4;srgap1a;sema3fa;sst2;ptges;rhoca;tnc;hmgbl1b;podxl;sst1.2;rab13;arpc5lb;znf703;socs1a;ptk2bb;jagn1a;cftr;loxl2a;anxa3b;hgfa;sema4e;prox1a;ackr3b;alcamb;sema5a;rxfp3.3b;srgap3;elp6;rnd2;cxcl20;cxcr3.1;sema4c;rac3a;ccl20b;foxj1a;wnt5b;vegfaa                                                                          |
| GO:0032879                         | regulation of localization                              | 1,523494283     | 0,004265358 | 0,100946806 | stxbp5a;srgap1a;cldnb;sema3fa;sst2;rab3c;panx1b;arl3l2;rhoca;hmgbl1b;cacng2a;sst1.2;unc119a;znf703;socs1a;ptk2bb;cftr;anxa3b;sema4e;prox1a;kcnd3;sema5a;srgap3;elp6;yjefn3;kcj19b;kcng4a;plcb3;rnd2;dzip1l;cxcr3.1;inpp5kb;kcna4;cerkl;rbpms2b;sema4c;wnk4b;rab3db;foxj1a;wnt5b;vegfaa                                               |

|            |                                                    |             |             |             |                                                                                                                                                                                                                                                                                                                 |
|------------|----------------------------------------------------|-------------|-------------|-------------|-----------------------------------------------------------------------------------------------------------------------------------------------------------------------------------------------------------------------------------------------------------------------------------------------------------------|
| GO:0071310 | cellular response to organic substance             | 1,485558514 | 0,005984187 | 0,130731462 | thraa;mapk14a;crhr1;rxrgb;skib;fgfr1a;glra1;sesn1;dynlrb1;rxfp2a;esr2b;rab13;paqr7b;sfrp1a;znf703;opr1b;socs1a;opr1b;jagn1a;cftr;jun;ube2w;agtr1b;prlrb;il12rb2;jrs1;ducp22a;ackr3b;ngfa;rxfp3.3b;bmp7b;ar;chrm3a;cxcl20;cxcr3.1;inpp5kb;kl;fgf20b;ccl20b;igfbp3;bambib;vegfaa                                  |
| GO:0051128 | regulation of cellular component organization      | 1,449177489 | 0,009097203 | 0,184543266 | mapk14a;rassf7b;casp9;rassf1;sema3fa;twf1b;lrrc4bb;arl3l2;rhoj;rhoca;tnc;ntn1b;cdc42se1;si:ch211-106h11.3;gmfb;zgc:110006;stmn1b;slit3;unc119a;arpc5lb;znf703;ptk2bb;sema4e;kctd12.2;sema5a;clstn2;arhgap17b;lmpa;rnd2;tmem67;inpp5kb;cerkl;rbpms2b;sema4c;rac3a;igfbp3;ccnd1;eps8l3a;rbm24a;vegfaa;wtip;lrrc4c |
| GO:2000026 | regulation of multicellular organismal development | 1,478869069 | 0,01029116  | 0,187158236 | mapk14a;casp9;ndrg1b;fgfr1a;sema3fa;sirt2;twf1b;glra1;lrrc4bb;arl3l2;mdkb;tnc;ntn1b;adgrg1;zgc:110006;slit3;atoh8;lfng;ptk2bb;lox12a;id4;irf7;sema4e;kctd12.2;id2a;her9;sema5a;ngfa;clstn2;yjefn3;rspo3;rbpms2b;sema4c;ccnd1;rbm24a;vegfaa;lrrc4c                                                               |
| GO:0009887 | animal organ morphogenesis                         | 1,451250704 | 0,010544126 | 0,187158236 | thraa;tbx2b;ttc9c;skib;wls;fgfr1a;slc26a2;eya4;veph1;sfrp1a;znf703;toporsa;atoh8;pls3;socs1a;adarb1a;cdk5r1b;fras1;ncs1a;kif17;id2a;edaradd;wnt9a;plcb3;rit1;lrrc39;col6a1;cerkl;fgf20b;reep6;fam20cb;igfbp3;pbx1a;ccnd1;foxj1a;wnt5b;rbm24a;vegfaa;wtip;ndrg4                                                  |
| GO:1902531 | regulation of intracellular signal transduction    | 1,493091959 | 0,011884115 | 0,198534626 | map4k2;epha7;fgfr1a;ror1;pdia2;sesn1;rcan2;epha2b;mcf2a;epha6;cdc42se1;hmgbl1b;paqr7b;socs1a;traf4b;vav2;fgd6;si:dkey-166d12.2;tp53bp2b;ducp22a;bmp7b;mertka;mrp2a;f2rl1.2;inpp5kb;arhgef19;cerkl;tiam2a;ccl20b;si:ch211-195b15.8;map2k6;chn1;eps8l3a;wtip                                                      |
| GO:0007267 | cell-cell signaling                                | 1,453924999 | 0,015763888 | 0,215806131 | stx3a;stx2a;chrna2a;wls;glra1;panx1b;fzd3a;grm3;cacng2a;chrne;sfrp1a;znf703;jun;id4;zgc:162025;ngfa;syn1;clstn2;apba2b;sv2bb;wnt9a;htr5ab;grik1a;rspo3;chrm3a;wnt7bb;wnt6b;mertka;pdyn;gabra2a;bambib;chrnb4;wnt5b;apba1a;notum1b                                                                               |
| GO:0008283 | cell proliferation                                 | 1,591253714 | 0,015899646 | 0,215806131 | tbx2b;wls;ndrg1b;fgfr1a;sirt2;pdf;tnc;s100a10b;adgrg1;ing4;npr3;ptk2bb;lox12a;id2a;ducp22a;tacc1;areg;usp13;lmo2;ccnd1;vegfaa;ndrg4;tnk2b;cdx1b                                                                                                                                                                 |
| GO:0042391 | regulation of membrane potential                   | 2,167573168 | 0,016083647 | 0,215806131 | slc26a3.2;chrna2a;slc26a3.1;slc26a2;glra1;slc26a5;slc26a1;chrne;gabra2a;chrnb4                                                                                                                                                                                                                                  |
| GO:0040007 | growth                                             | 1,600257721 | 0,016950816 | 0,215806131 | mapk14a;isl1;casp9;fgfr1a;sema3fa;arl3l2;cldnc;tnc;ntn1b;si:ch211-106h11.3;slit3;npr3;lfng;sema4e;sema5a;mrp2a;col6a1;tmem67;sema4c;lmo2;igfbp3;wnt5b;ndrg4                                                                                                                                                     |
| GO:0048568 | embryonic organ development                        | 1,484756918 | 0,017076757 | 0,215806131 | tbx2b;ttc9c;skib;wls;slc26a2;eya4;veph1;sfrp1a;etnpp1;znf703;atoh8;pls3;lfng;socs1a;adarb1a;fras1;ncs1a;cavin1b;edaradd;wnt9a;plcb3;rit1;znf219;fgf20b;lmo2;igfbp3;foxj1a;wnt5b;rbm24a;wtip;ndrg4                                                                                                               |
| GO:0035270 | endocrine system development                       | 2,140135533 | 0,017477257 | 0,215806131 | thraa;isl1;tbx2b;cdx4;insm1b;fh11b;glis3;gcga;wnt5b;vegfaa                                                                                                                                                                                                                                                      |

#### KEGG pathways

| geneSet  | description                    | enrichmentRatio | pValue      | FDR         | userId                                                                                                                                           |
|----------|--------------------------------|-----------------|-------------|-------------|--------------------------------------------------------------------------------------------------------------------------------------------------|
| dre04514 | Cell adhesion molecules (CAMs) | 2,507829031     | 2,56E-04    | 0,041440345 | itgav;nrcama;nectin3b;cldnb;lrrc4bb;cldnc;cldn15la;cldn11a;negr1;cldn11b;itga9;cldn5a;cd99;sdc4;zmp:0000001082;si:ch211-286o17.1;cldn15a;lrrc4c  |
| dre04310 | Wnt signaling pathway          | 2,213258637     | 6,30E-04    | 0,050998498 | tle3a;tcf7l2;camk2d2;gpc4;fzd3a;siah1;sfrp1a;rac2;jun;rac1l;dv12;wnt9a;plcb3;wnt7bb;wnt6b;cxsc4;rac3a;bambib;ccnd1;wnt5b                         |
| dre04510 | Focal adhesion                 | 1,912692649     | 0,001539694 | 0,08314346  | lamb2;ppp1caa;hrasb;itgav;col2a1b;flncb;parvb;tnc;itga9;itga3a;rac2;jun;parvaa;vav2;hgfa;rac1l;flna;itga1;col6a1;pdgfd;rac3a;ccnd1;vegfaa;pdgfaa |
| dre04512 | ECM-receptor interaction       | 2,566580046     | 0,003351413 | 0,135732231 | lamb2;itgav;col2a1b;tnc;itga9;itga3a;sdc4;sv2bb;itga1;col6a1;hspg2                                                                               |
| dre04115 | p53 signaling pathway          | 2,45139406      | 0,007036602 | 0,227985895 | casp9;baxa;sesn1;apaf1;siah1;rprma;perp;bida;igfbp3;ccnd1                                                                                        |
