# Supplementary material for: A δ-cell subpopulation with a pro-β-cell identity contributes to efficient age-independent recovery in a zebrafish model of diabetes
Source: eLife journal article supplement (doi:10.7554/elife.67576), 2022-01-21
Supplement: supp [file elife-67576-supp-v1.zip › elife_poa_e67576_Figure_5_source_data_5.pdf]

**Figure 5-Source Data 5. Biological processes and pathways overrepresented in GFPhigh**

GO identified by WebGestalt (FDR<0.25)

GO from genes overexpressed in sst1.1:GFPhigh (sst1.1 delta cells) versus sst1.1:GFPlow (DESeq FC>2x, Padj<0.05)

| Biological Process (non redudant) |                                             |                 |             |             |                                                                                                                                                                                                                                                                                           |
|-----------------------------------|---------------------------------------------|-----------------|-------------|-------------|-------------------------------------------------------------------------------------------------------------------------------------------------------------------------------------------------------------------------------------------------------------------------------------------|
| geneSet                           | description                                 | enrichmentRatio | pValue      | FDR         | userId                                                                                                                                                                                                                                                                                    |
| GO:0048585                        | negative regulation of response to stimulus | 2,238675993     | 6,89E-05    | 0,009197199 | pde3a;wif1;mylipa;sema6dl;sema3gb;lemd3;chico;ek1;ephb2b;sema3ga;kita;ret;sema3fb;sik1;rgs7bpa;cdon;sigirr;sema4ab;rasa3;dkk3b;met;dab2ipb;sik2a;ntrk3b;duosp2;duosp7;numbl                                                                                                               |
| GO:0051336                        | regulation of hydrolase activity            | 2,130937538     | 9,03E-05    | 0,009197199 | llgl1;asap2a;serpinb1l3;arhgap4b;iqsec1b;si:ch211-195b15.7;ek1;crim1;ppp1r14bb;ppp2r5cb;plxnb3;si:dkeyp-19e1.3;si:dkey-191g9.5;tbc1d9;iqgap2;plxna2;ppp2r2cb;rasa3;syngap1b;ppp1r3ca;arhgap32b;dab2ipb;arhgap32a;pcsk1nl;si:ch211-218g4.2;si:dkey-117n7.5;si:dkey-21e13.3;ppp2r2bb;ndel1b |
| GO:0010648                        | negative regulation of cell communication   | 2,332553743     | 1,30E-04    | 0,009197199 | pde3a;wif1;chga;mylipa;lemd3;chico;ek1;ephb2b;kita;ret;sik1;pfkla;rgs7bpa;cdon;rasa3;dkk3b;met;dab2ipb;sik2a;ntrk3b;duosp2;duosp7;numbl                                                                                                                                                   |
| GO:0023057                        | negative regulation of signaling            | 2,332553743     | 1,30E-04    | 0,009197199 | pde3a;wif1;chga;mylipa;lemd3;chico;ek1;ephb2b;kita;ret;sik1;pfkla;rgs7bpa;cdon;rasa3;dkk3b;met;dab2ipb;sik2a;ntrk3b;duosp2;duosp7;numbl                                                                                                                                                   |
| GO:0071526                        | semaphorin-plexin signaling pathway         | 5,368676686     | 2,44E-04    | 0,013876777 | sema6dl;sema3gb;plxnb3;sema3ga;sema3fb;plxna2;sema4ab                                                                                                                                                                                                                                     |
| GO:0022610                        | biological adhesion                         | 2,10091628      | 7,77E-04    | 0,036758344 | adora2b;ptprfb;dlg1;ctnnb1;ek1;plxnb3;fat3a;itga6a;pkp3a;ret;epdl2;cdh10a;plxna2;ctnnd2a;vcam1b;celsr1a;epdl1;nlg1;nlg2b;runx1;cntn4;pcdh10a                                                                                                                                              |
| GO:0048568                        | embryonic organ development                 | 1,877190068     | 0,00116332  | 0,047197574 | atp1a1a.1;gpr22a;gon4l;ncoa2;prkcbb;atp2a2a;crim1;csn1p1a;s1pr2;nkx3.2;pacsin1b;ngs;hdac9b;plxna2;furina;etv5a;hoxc4a;cxxc5a;runx1;scarb2a;polr1a;vdra;numbl;irf6;notch1a;cav1;grk3                                                                                                       |
| GO:0016311                        | dephosphorylation                           | 2,148884414     | 0,001343289 | 0,047686777 | pfkfb2b;ptprfb;g6pca.2;g6pcb;ptprdb;ppp1r14bb;ppp2r5cb;ptprga;ppm1nb;ptprna;ca16b;ppp2r2cb;ppp1r3ca;ptprnb;ptprua;duosp2;ppp2r2bb;duosp7;plppr2a                                                                                                                                          |
| GO:0032879                        | regulation of localization                  | 1,726067481     | 0,001693151 | 0,053428331 | chga;sema6dl;arrb2b;sema3gb;arhgap4b;cplx2l;kcnj2a;slc30a2;cacna1ba;mdga2a;pparaa;plxnb3;rhbdf1a;s1pr2;sema3ga;rrad;pparab;sema3fb;letm1;jph1a;kcnj19a;scn1ba;plxna2;pfkla;sema4ab;scn1lab;gck;amot;vegfb;kcng1;notch1a;rsm26                                                             |
| GO:0005975                        | carbohydrate metabolic process              | 2,103644742     | 0,002260426 | 0,064196101 | pfkfb2b;g6pca.2;g6pcb;gys1;slc23a2;aldocb;pfkpa;chst2b;pfkla;ndst2b;hs2st1b;scn1lab;man2a2;gck;ppp1r3ca;klb;man2c1;chst1                                                                                                                                                                  |
| GO:0007267                        | cell-cell signaling                         | 1,688429032     | 0,004441315 | 0,114666672 | wif1;chga;mylipa;dlg1;ndrg2;bdfn;cplx2l;chico;cacna1ba;nk2;grin2bb;bcl9;zgc.101731;grid1b;bcl9l;scgn;sv2a;pfkla;scn1lab;gck;chrm4a;dkk3b;met;nlg1;nlg2b;gucy1b1;gabrb4;syn2b                                                                                                              |

|            |                                                   |             |             |             |                                                                                                                                                                                                                           |
|------------|---------------------------------------------------|-------------|-------------|-------------|---------------------------------------------------------------------------------------------------------------------------------------------------------------------------------------------------------------------------|
| GO:0051674 | localization of cell                              | 1,663899796 | 0,005423833 | 0,12836405  | atp1a1a.1;sema6dl;arrrb2b;sema3gb;arhgap4b;ek1;stat3;mdga2a;plekhg5a;plxnb3;rhbdf1a;s1pr2;sema3ga;nhs1b;kita;apln;ret;sema3fb;plxna2;sema4ab;rxfp3.3a1;celsr1a;met;amot;vegfb;nr6a1a;ndel1b;zbtb4                         |
| GO:0040011 | locomotion                                        | 1,577029526 | 0,006725155 | 0,146918761 | atp1a1a.1;ptprfb;sema6dl;arrrb2b;sema3gb;arhgap4b;ek1;stat3;mdga2a;plekhg5a;plxnb3;rhbdf1a;s1pr2;sema3ga;nhs1b;kita;apln;ret;sema3fb;plxna2;sema4ab;rxfp3.3a1;celsr1a;chrn4a;met;gba;amot;vegfb;cntn4;nr6a1a;ndel1b;zbtb4 |
| GO:0072358 | cardiovascular system development                 | 1,725033495 | 0,008771799 | 0,17611069  | vash2;lemd3;iqsec1b;plekhg5a;crim1;s1pr2;mat2aa;apln;hdac9b;colec12;foxo1b;vcam1b;rasa3;dab2ipb;nlg1;amot;cxc5a;runx1;vegfb;foxo1a;mtbl;notch1a                                                                           |
| GO:0048598 | embryonic morphogenesis                           | 1,594409782 | 0,009521346 | 0,17611069  | atp1a1a.1;lats1;gpr22a;gon4l;mylipa;stat3;plekhg5a;atp2a2a;crim1;s1pr2;nkx3.2;pacsin1b;apln;ngs;plxna2;cdon;furina;celsr1a;etv5a;hoxc4a;sall1a;cxc5a;polr1a;vdra;irf6;notch1a;grk3;zbtb4                                  |
| GO:0060485 | mesenchyme development                            | 2,149709956 | 0,009921729 | 0,17611069  | gpr22a;sema6dl;sema3gb;ek1;stat3;sema3ga;bcl9l;ret;sema3fb;sema4ab;furina;polr1a                                                                                                                                          |
| GO:0071310 | cellular response to organic substance            | 1,540325648 | 0,011744623 | 0,196204287 | lemd3;keap1a;ncoa2;bdnf;hsp70.3;smad9;crf1a;smad6b;pparaa;si:ch73-335l21.1;kita;pparab;nr4a3;foxo1b;rxfp3.3a1;chrn4a;sall1a;dab2ipb;tet1;brinp3b;avpr1aa;rxrba;ntrk3b;vegfb;vdra;foxo1a;nr6a1a;mapk10;cav1;bmpr1ba        |
| GO:1902531 | regulation of intracellular signal transduction   | 1,593670259 | 0,013989696 | 0,220710669 | pde3a;arhgef4;lemd3;iqsec1b;kank2;ek1;ephb2b;prkcbb;plekhg5a;arhgef1a;kita;pak6b;ret;eps8l2;sik1;rasa3;met;arfgef2;prex1;iqsec2b;sik2a;ntrk3b;dusp2;sh3rf2;dusp7                                                          |
| GO:0007498 | mesoderm development                              | 2,684338343 | 0,01482677  | 0,220710669 | gpr22a;apln;bcl9l;furina;etv5a;zmiz2;notch1a                                                                                                                                                                              |
| GO:0045595 | regulation of cell differentiation                | 1,651900519 | 0,016229692 | 0,220710669 | adora2b;pde3a;sema6dl;sema3gb;elavl3;bdnf;ek1;stat3;mdga2a;plxnb3;pacsin1b;sema3ga;sema3fb;plxna2;cdon;sema4ab;brinp3b;plekho1b;runx1;notch1a;add1                                                                        |
| GO:0051240 | positive regulation of multicellular organismal p | 1,945443817 | 0,016320155 | 0,220710669 | pde3a;olfm1a;myl7;stat3;plxnb3;pacsin1b;apln;plxna2;brinp3b;avpr1aa;runx1;vegfb;notch1a                                                                                                                                   |
| GO:0051094 | positive regulation of developmental process      | 1,976578953 | 0,018387923 | 0,237371372 | pde3a;olfm1a;stat3;plxnb3;pacsin1b;plxna2;cdon;brinp3b;runx1;vegfb;notch1a;add1                                                                                                                                           |
| GO:0033993 | response to lipid                                 | 2,029832646 | 0,019640816 | 0,242521376 | igf2r;keap1a;pparaa;slc37a4a;pparab;nr4a3;tet1;brinp3b;rxrba;vdra;nr6a1a                                                                                                                                                  |

#### KEGG pathways

| geneSet  | description                     | enrichmentRatio | pValue      | FDR         |                                                                                                                                                       |
|----------|---------------------------------|-----------------|-------------|-------------|-------------------------------------------------------------------------------------------------------------------------------------------------------|
| dre04514 | Cell adhesion molecules (CAMs)  | 3,404163361     | 6,33E-07    | 1,03E-04    | cntn2;sdc2;ptprfb;ncam1b;cadm1a;itga6a;cadm1b;si:ch73-61d6.3;cntnap2a;jam2a;nfasca;glg1a;vcam1b;itga6b;cd28l;ntng2a;nlg1;nlg2b;nectin1b;cntn1a;ptprfa |
| dre00051 | Fructose and mannose metabolism | 3,668051994     | 0,002556591 | 0,156903699 | pfkfb2b;aldocb;pfkpa;sord;pfkfb4a;pfkla;hk2                                                                                                           |
| dre00052 | Galactose metabolism            | 4,096785344     | 0,002905624 | 0,156903699 | g6pca.2;g6pcb;pfkpa;pfkla;gck;hk2                                                                                                                     |
| dre00500 | Starch and sucrose metabolism   | 3,755386565     | 0,004571532 | 0,171692908 | g6pca.2;g6pcb;gys1;zgc:66313;gck;hk2                                                                                                                  |
| dre01230 | Biosynthesis of amino acids     | 2,56049084      | 0,005299164 | 0,171692908 | tktb;cbsb;gpt2l;aldocb;aco1;pfkpa;mat2ab;mat2aa;pklr;pfkla                                                                                            |
| dre00010 | Glycolysis / Gluconeogenesis    | 2,633647721     | 0,006670297 | 0,180098029 | pck1;g6pca.2;g6pcb;aldocb;pfkpa;pklr;pfkla;gck;hk2                                                                                                    |
| dre00534 | Glycosaminoglycan biosynthesis  | 3,755386565     | 0,009490054 | 0,219626956 | hs3st2;ndst2b;xylt1;hs2st1b;glceb                                                                                                                     |
