# Supplementary material for: A δ-cell subpopulation with a pro-β-cell identity contributes to efficient age-independent recovery in a zebrafish model of diabetes
Source: eLife journal article supplement (doi:10.7554/elife.67576), 2022-01-21
Supplement: supp [file elife-67576-supp-v1.zip › elife_poa_e67576_Figure_6_source_data_1.pdf]

Figure 6-Source Data 1

**sst1.1GFP<sup>high</sup> cell number**  
Adult pancreas (FACS)

| CTL  | 3dpt | 20dpt |
|------|------|-------|
| 708  | 115  | 56    |
| 1014 | 565  | 719   |
| 1628 | 373  | 123   |
| 804  | 399  | 472   |
| 1383 | 242  | 708   |
| 792  | 532  | 337   |
| 1078 | 639  | 54    |
| 938  | 697  | 50    |
| 933  |      |       |
| 704  |      |       |
| 788  |      |       |
