# Supplementary material for: A δ-cell subpopulation with a pro-β-cell identity contributes to efficient age-independent recovery in a zebrafish model of diabetes
Source: eLife journal article supplement (doi:10.7554/elife.67576), 2022-01-21
Supplement: supp [file elife-67576-supp-v1.zip › elife_poa_e67576_Figure_6_source_data_2.pdf]

**Figure 6-Source Data 2. Significant DE genes between sst1.1  $\delta$ -cells and 20 dpt bihormonal cells.**  
DESeq comparison (Padj<0.05)

| Ensembl_ID          | Gene_Name          | Mean_<br>CTL_sst1.1_delta | Mean_<br>20dpt_bihormonal | log2FC | Padj     |
|---------------------|--------------------|---------------------------|---------------------------|--------|----------|
| ENSDARG00000035350  | ins                | 2769                      | 398302                    | 5,76   | 3,20E-07 |
| ENSDARG00000114192  | BX548011.5         | 4                         | 400                       | 5,10   | 7,20E-03 |
| ENSDARG00000022569  | nkx6.1             | 0                         | 62                        | 5,07   | 6,82E-04 |
| ENSDARG00000101481  | rbp5               | 1                         | 76                        | 4,74   | 2,13E-04 |
| ENSDARG00000094132  | igf1               | 0                         | 43                        | 4,57   | 9,02E-03 |
| ENSDARG00000015559  | fstl1a             | 11                        | 479                       | 4,53   | 4,70E-05 |
| ENSDARG00000061240  | cbln4              | 0                         | 304                       | 4,32   | 1,69E-03 |
| ENSDARG00000024032  | coch               | 1                         | 93                        | 4,24   | 2,36E-02 |
| ENSDARG00000062538  | si:dkey-215k6.1    | 0                         | 23                        | 4,03   | 5,64E-03 |
| ENSDARG00000101637  | ccnd1              | 7                         | 181                       | 3,95   | 6,74E-06 |
| ENSDARG00000007682  | pdpfa              | 802                       | 16778                     | 3,85   | 1,06E-03 |
| ENSDARG00000068892  | sostdc1a           | 6                         | 151                       | 3,78   | 1,99E-02 |
| ENSDARG00000038066  | kpna2              | 2                         | 122                       | 3,69   | 1,27E-02 |
| ENSDARG00000056590  | calca              | 0                         | 67                        | 3,64   | 2,35E-02 |
| ENSDARG00000044691  | ppp1r3b            | 28                        | 568                       | 3,63   | 7,94E-03 |
| ENSDARG00000102483  | wu:fb44b02         | 0                         | 24                        | 3,56   | 1,51E-02 |
| ENSDARG00000059798  | kcnq1              | 0                         | 23                        | 3,49   | 4,69E-02 |
| ENSDARG00000039657  | fank1              | 1                         | 28                        | 3,43   | 2,85E-02 |
| ENSDARG00000087804  | tnfrsf11a          | 1                         | 43                        | 3,35   | 2,83E-02 |
| ENSDARG00000002172  | aplnra             | 1                         | 41                        | 3,33   | 2,56E-02 |
| ENSDARG00000035899  | lingo1b            | 1                         | 57                        | 3,33   | 2,83E-02 |
| ENSDARG00000092057  | si:dkey-90l23.1    | 387                       | 4570                      | 3,21   | 3,64E-02 |
| ENSDARG00000014910  | panx1b             | 3                         | 48                        | 3,21   | 2,37E-03 |
| ENSDARG00000043137  | cdca8              | 0                         | 26                        | 3,18   | 3,06E-02 |
| ENSDARG00000060259  | zgc:162160         | 7                         | 80                        | 3,18   | 4,29E-04 |
| ENSDARG00000051923  | ccnb1              | 0                         | 24                        | 3,14   | 4,12E-02 |
| ENSDARG00000034344  | pcdh19             | 22                        | 296                       | 3,10   | 1,60E-02 |
| ENSDARG00000070000  | txnipb             | 1                         | 111                       | 3,10   | 4,40E-02 |
| ENSDARG00000099211  | si:dkey-220o5.5    | 0                         | 42                        | 3,04   | 3,75E-02 |
| ENSDARG00000004713  | mad2l1             | 1                         | 32                        | 2,99   | 4,89E-02 |
| ENSDARG00000059956  | ptk6b              | 6                         | 89                        | 2,97   | 2,46E-02 |
| ENSDARG00000006044  | ust                | 1                         | 35                        | 2,93   | 2,92E-02 |
| ENSDARG00000057714  | cmah               | 97                        | 920                       | 2,93   | 1,25E-03 |
| ENSDARG00000102687  | CABZ01085139.1     | 535                       | 5046                      | 2,88   | 2,21E-02 |
| ENSDARG00000104501  | FP236812.1         | 1                         | 34                        | 2,87   | 3,88E-02 |
| ENSDARG000000071410 | cks2               | 2                         | 28                        | 2,82   | 2,78E-02 |
| ENSDARG000000012071 | angptl1a           | 26                        | 489                       | 2,78   | 4,25E-02 |
| ENSDARG000000074310 | rbfox3b            | 18                        | 192                       | 2,73   | 2,36E-02 |
| ENSDARG00000014646  | aoc2               | 151                       | 1529                      | 2,73   | 2,52E-02 |
| ENSDARG000000088140 | hsd17b7            | 2                         | 28                        | 2,72   | 2,51E-02 |
| ENSDARG00000062797  | nell2b             | 13                        | 108                       | 2,66   | 3,42E-03 |
| ENSDARG00000007971  | cks1b              | 3                         | 37                        | 2,65   | 4,23E-02 |
| ENSDARG00000057610  | cdkn2c             | 2                         | 23                        | 2,64   | 2,69E-02 |
| ENSDARG00000091234  | si:ch73-335l21.4   | 0                         | 40                        | 2,63   | 8,17E-11 |
| ENSDARG00000057706  | si:ch211-137i24.10 | 4                         | 124                       | 2,61   | 2,56E-02 |
| ENSDARG00000061249  | myom1a             | 19                        | 164                       | 2,59   | 3,13E-02 |
| ENSDARG00000078828  | npb                | 29                        | 292                       | 2,55   | 2,36E-02 |
| ENSDARG00000062346  | cacna1ea           | 18                        | 145                       | 2,54   | 6,91E-03 |
| ENSDARG00000024967  | fancg              | 4                         | 36                        | 2,51   | 1,77E-02 |
| ENSDARG00000040907  | gcgb               | 695                       | 7351                      | 2,51   | 2,81E-02 |
| ENSDARG00000090401  | CABZ01020840.1     | 11                        | 86                        | 2,50   | 4,40E-02 |
| ENSDARG00000045834  | si:dkey-14d8.7     | 221                       | 1653                      | 2,49   | 4,40E-02 |
| ENSDARG000000069752 | ckba               | 28                        | 234                       | 2,47   | 3,16E-02 |
| ENSDARG00000025667  | adgrb2             | 1                         | 22                        | 2,47   | 3,41E-02 |
| ENSDARG00000014967  | g6pcb              | 8208                      | 61158                     | 2,45   | 4,68E-02 |
| ENSDARG00000069681  | pcgf6              | 7                         | 45                        | 2,42   | 1,05E-02 |

|                    |                   |       |        |      |          |
|--------------------|-------------------|-------|--------|------|----------|
| ENSDARG00000039034 | marcksl1a         | 2     | 20     | 2,39 | 4,12E-02 |
| ENSDARG00000079296 | gcga              | 2295  | 20588  | 2,39 | 3,38E-02 |
| ENSDARG00000096908 | si:ch73-185c24.2  | 5     | 48     | 2,37 | 4,69E-02 |
| ENSDARG00000074597 | lzt52a            | 4     | 25     | 2,37 | 4,43E-02 |
| ENSDARG00000038222 | tyw3              | 7     | 48     | 2,35 | 2,76E-02 |
| ENSDARG00000093549 | selenop           | 4     | 78     | 2,32 | 3,47E-02 |
| ENSDARG00000075027 | fgfr1bl           | 6     | 37     | 2,26 | 3,30E-02 |
| ENSDARG00000117089 | CKS2              | 3     | 20     | 2,25 | 4,32E-02 |
| ENSDARG00000014499 | nutf2l            | 14    | 73     | 2,23 | 3,68E-03 |
| ENSDARG00000038812 | e2f5              | 18    | 107    | 2,22 | 3,69E-02 |
| ENSDARG00000037097 | slc7a2            | 37    | 235    | 2,20 | 3,15E-02 |
| ENSDARG00000094557 | nupr1             | 22    | 182    | 2,14 | 4,40E-02 |
| ENSDARG00000067848 | nmrk2             | 20    | 119    | 2,13 | 4,72E-02 |
| ENSDARG00000096603 | bmb               | 47    | 228    | 2,12 | 2,36E-02 |
| ENSDARG00000014804 | cacna2d1a         | 2     | 19     | 2,11 | 4,32E-02 |
| ENSDARG00000019302 | mid1ip1b          | 312   | 1468   | 2,08 | 8,19E-03 |
| ENSDARG00000032799 | kcnd2             | 76    | 340    | 2,08 | 1,13E-02 |
| ENSDARG00000075706 | si:ch211-106h4.9  | 11    | 63     | 2,07 | 4,59E-02 |
| ENSDARG00000031317 | ppdpfb            | 28857 | 126990 | 2,04 | 9,38E-03 |
| ENSDARG00000100513 | CABZ01079011.1    | 555   | 2441   | 2,04 | 1,69E-03 |
| ENSDARG00000054177 | adgra1a           | 8     | 44     | 2,02 | 3,19E-02 |
| ENSDARG00000033971 | prrx1a            | 18    | 89     | 1,99 | 4,79E-02 |
| ENSDARG00000032765 | net1              | 9     | 52     | 1,97 | 4,98E-02 |
| ENSDARG00000002988 | tnnt2d            | 16    | 68     | 1,95 | 2,35E-02 |
| ENSDARG00000076010 | twist1b           | 19    | 83     | 1,94 | 2,69E-02 |
| ENSDARG00000043131 | BX664625.1        | 10    | 46     | 1,94 | 4,12E-02 |
| ENSDARG00000058117 | snap25b           | 181   | 763    | 1,94 | 1,63E-02 |
| ENSDARG00000014053 | olfm1b            | 760   | 3258   | 1,93 | 2,35E-02 |
| ENSDARG00000041411 | rad51             | 7     | 31     | 1,93 | 4,38E-02 |
| ENSDARG00000003635 | mogat3b           | 14    | 58     | 1,91 | 2,52E-02 |
| ENSDARG00000079236 | si:dkey-253d23.11 | 5     | 21     | 1,91 | 2,44E-02 |
| ENSDARG00000093008 | adgrf3b           | 6     | 28     | 1,90 | 4,69E-02 |
| ENSDARG00000042876 | abracl            | 5     | 26     | 1,88 | 4,64E-02 |
| ENSDARG00000019417 | gadd45ga          | 967   | 3960   | 1,86 | 4,12E-02 |
| ENSDARG00000061994 | acacb             | 46    | 179    | 1,83 | 1,24E-02 |
| ENSDARG00000076419 | si:dkeyp-117b11.2 | 7     | 29     | 1,83 | 2,65E-02 |
| ENSDARG00000105112 | ntn1a             | 4     | 18     | 1,79 | 4,32E-02 |
| ENSDARG00000099186 | slc1a5            | 22    | 87     | 1,79 | 2,57E-02 |
| ENSDARG00000100686 | si:ch211-241b2.4  | 7     | 29     | 1,78 | 4,23E-02 |
| ENSDARG00000079659 | wdr53             | 8     | 33     | 1,78 | 3,30E-02 |
| ENSDARG00000062152 | chaf1a            | 17    | 72     | 1,77 | 4,41E-02 |
| ENSDARG00000103712 | plpp7             | 10    | 43     | 1,74 | 4,23E-02 |
| ENSDARG00000013950 | pdf               | 10    | 39     | 1,74 | 2,84E-02 |
| ENSDARG00000079783 | isg20             | 59    | 212    | 1,72 | 2,01E-02 |
| ENSDARG00000006782 | rb1               | 6     | 23     | 1,72 | 4,32E-02 |
| ENSDARG00000042977 | nfil3             | 11    | 41     | 1,72 | 4,64E-02 |
| ENSDARG00000036775 | dtd2              | 32    | 118    | 1,71 | 2,72E-02 |
| ENSDARG00000078077 | dph2              | 12    | 45     | 1,69 | 4,06E-02 |
| ENSDARG00000069708 | cdc34a            | 10    | 37     | 1,69 | 3,84E-02 |
| ENSDARG00000079815 | lyrm7             | 42    | 144    | 1,66 | 2,69E-02 |
| ENSDARG00000004274 | zgc:112496        | 13    | 47     | 1,63 | 4,40E-02 |
| ENSDARG00000012044 | polr3gla          | 10    | 37     | 1,63 | 4,59E-02 |
| ENSDARG00000092780 | si:ch1073-170o4.1 | 14    | 48     | 1,63 | 4,79E-02 |
| ENSDARG00000060126 | acyp1             | 62    | 210    | 1,63 | 4,12E-02 |
| ENSDARG00000062702 | ankmy1            | 25    | 88     | 1,61 | 3,76E-02 |
| ENSDARG00000042659 | thyn1             | 33    | 109    | 1,61 | 4,32E-02 |
| ENSDARG00000114589 | jam3a             | 210   | 655    | 1,60 | 4,44E-03 |
| ENSDARG00000104181 | tmsb1             | 5059  | 16286  | 1,60 | 4,12E-02 |
| ENSDARG00000060445 | elp6              | 41    | 132    | 1,59 | 2,17E-02 |
| ENSDARG00000101367 | si:ch73-193i22.1  | 121   | 393    | 1,59 | 2,76E-02 |
| ENSDARG00000078683 | RNF14 (1 of many) | 39    | 128    | 1,59 | 2,81E-02 |
| ENSDARG00000015050 | calm3a            | 3052  | 9638   | 1,58 | 2,21E-02 |
| ENSDARG00000036878 | sh3bgrl2          | 156   | 516    | 1,58 | 4,64E-02 |

|                     |                   |      |      |      |          |
|---------------------|-------------------|------|------|------|----------|
| ENSDARG00000088178  | tp53inp2          | 13   | 42   | 1,57 | 4,99E-02 |
| ENSDARG00000070012  | sesn2             | 116  | 361  | 1,57 | 2,22E-02 |
| ENSDARG00000024311  | nsmce4a           | 9    | 30   | 1,57 | 4,64E-02 |
| ENSDARG00000030805  | znhit2            | 14   | 45   | 1,56 | 1,94E-02 |
| ENSDARG00000054540  | imp4              | 31   | 95   | 1,54 | 1,06E-02 |
| ENSDARG00000035427  | surf6             | 11   | 35   | 1,52 | 3,63E-02 |
| ENSDARG00000051749  | tigara            | 20   | 63   | 1,52 | 4,79E-02 |
| ENSDARG00000054696  | psmb4             | 182  | 549  | 1,52 | 1,83E-02 |
| ENSDARG00000061314  | ngrn              | 38   | 115  | 1,51 | 3,00E-02 |
| ENSDARG00000037188  | rpa2              | 39   | 117  | 1,50 | 2,68E-02 |
| ENSDARG00000101110  | LYRM4             | 34   | 100  | 1,50 | 1,31E-02 |
| ENSDARG00000068629  | cd151l            | 88   | 261  | 1,49 | 1,60E-02 |
| ENSDARG00000076667  | ccng1             | 2624 | 7540 | 1,49 | 1,25E-03 |
| ENSDARG00000102822  | pam16             | 47   | 141  | 1,49 | 3,30E-02 |
| ENSDARG00000060338  | trmt12            | 21   | 65   | 1,48 | 4,59E-02 |
| ENSDARG00000045155  | phf5a             | 36   | 107  | 1,48 | 2,72E-02 |
| ENSDARG00000026577  | cdk2              | 22   | 66   | 1,47 | 3,88E-02 |
| ENSDARG00000043728  | srek1ip1          | 27   | 78   | 1,45 | 1,98E-02 |
| ENSDARG00000063474  | arfgef1           | 274  | 771  | 1,44 | 1,97E-02 |
| ENSDARG00000075616  | polr2k            | 50   | 148  | 1,44 | 4,41E-02 |
| ENSDARG00000053452  | pop5              | 21   | 59   | 1,43 | 2,44E-02 |
| ENSDARG00000003941  | rrs1              | 57   | 160  | 1,42 | 2,76E-02 |
| ENSDARG00000103484  | si:ch211-215k15.5 | 39   | 110  | 1,41 | 3,16E-02 |
| ENSDARG00000058394  | tagln3b           | 280  | 789  | 1,41 | 3,79E-02 |
| ENSDARG00000006434  | polr1e            | 40   | 112  | 1,41 | 2,12E-02 |
| ENSDARG00000099439  | serp1             | 690  | 1905 | 1,41 | 1,51E-02 |
| ENSDARG00000011360  | nfatc2ip          | 26   | 73   | 1,41 | 4,41E-02 |
| ENSDARG00000112476  | CABZ01048143.1    | 55   | 153  | 1,41 | 2,22E-02 |
| ENSDARG00000014017  | rrm1              | 23   | 63   | 1,40 | 4,32E-02 |
| ENSDARG00000076568  | sec61b            | 1064 | 2942 | 1,40 | 2,78E-02 |
| ENSDARG00000074305  | si:ch73-257c13.2  | 28   | 78   | 1,39 | 4,24E-02 |
| ENSDARG00000017728  | phb2b             | 119  | 326  | 1,39 | 2,46E-02 |
| ENSDARG00000018953  | gclm              | 41   | 111  | 1,39 | 1,47E-02 |
| ENSDARG00000071594  | TIMM21            | 42   | 116  | 1,38 | 3,58E-02 |
| ENSDARG00000071403  | oaz1a             | 1089 | 2995 | 1,38 | 3,88E-02 |
| ENSDARG00000097630  | si:ch211-282b22.1 | 45   | 122  | 1,38 | 2,68E-02 |
| ENSDARG00000002613  | rpa3              | 26   | 71   | 1,37 | 3,69E-02 |
| ENSDARG000000039347 | rps24             | 1025 | 2721 | 1,36 | 1,51E-02 |
| ENSDARG000000060041 | lig1              | 35   | 94   | 1,35 | 4,38E-02 |
| ENSDARG00000036924  | tatdn1            | 30   | 80   | 1,35 | 4,98E-02 |
| ENSDARG00000094300  | si:ch211-160e1.5  | 243  | 641  | 1,33 | 3,30E-02 |
| ENSDARG00000037108  | pfdn6             | 135  | 351  | 1,33 | 2,18E-02 |
| ENSDARG00000020623  | baxa              | 50   | 131  | 1,33 | 1,60E-02 |
| ENSDARG00000090872  | si:dkey-276j7.1   | 181  | 473  | 1,32 | 2,36E-02 |
| ENSDARG00000020895  | bag1              | 141  | 367  | 1,32 | 2,44E-02 |
| ENSDARG00000069082  | mrm3b             | 21   | 55   | 1,32 | 4,12E-02 |
| ENSDARG00000005772  | tsr2              | 23   | 62   | 1,32 | 4,32E-02 |
| ENSDARG00000013938  | psmb3             | 544  | 1425 | 1,32 | 3,70E-02 |
| ENSDARG00000023852  | lsm4              | 114  | 293  | 1,30 | 2,61E-02 |
| ENSDARG00000111785  | trappc2l          | 162  | 425  | 1,30 | 4,79E-02 |
| ENSDARG00000057805  | mrpl28            | 96   | 243  | 1,30 | 1,55E-02 |
| ENSDARG00000038288  | cd151             | 70   | 180  | 1,30 | 3,15E-02 |
| ENSDARG00000086699  | smim15            | 40   | 103  | 1,30 | 2,65E-02 |
| ENSDARG00000039719  | mrps26            | 29   | 76   | 1,30 | 2,81E-02 |
| ENSDARG00000101979  | eps8l3a           | 47   | 121  | 1,29 | 4,20E-02 |
| ENSDARG00000037835  | polr3k            | 86   | 222  | 1,29 | 3,69E-02 |
| ENSDARG00000113969  | supt4h1           | 137  | 356  | 1,29 | 4,79E-02 |
| ENSDARG00000090386  | cd3eap            | 66   | 170  | 1,28 | 4,38E-02 |
| ENSDARG00000099997  | cox20             | 70   | 177  | 1,28 | 2,34E-02 |
| ENSDARG00000104709  | sptrn             | 24   | 62   | 1,28 | 4,32E-02 |
| ENSDARG00000042660  | fam32a            | 241  | 605  | 1,28 | 2,81E-02 |
| ENSDARG00000076518  | mettl1            | 60   | 154  | 1,28 | 4,64E-02 |
| ENSDARG00000063665  | mat2al            | 389  | 956  | 1,27 | 2,22E-02 |

|                     |                   |       |       |      |          |
|---------------------|-------------------|-------|-------|------|----------|
| ENSDARG00000017093  | emc8              | 307   | 757   | 1,27 | 1,15E-02 |
| ENSDARG00000042708  | tuba8l            | 224   | 567   | 1,26 | 4,54E-02 |
| ENSDARG00000039400  | polr1c            | 110   | 273   | 1,26 | 4,23E-02 |
| ENSDARG00000071733  | si:ch211-207i20.3 | 36    | 89    | 1,25 | 4,41E-02 |
| ENSDARG00000003846  | mrpl21            | 35    | 89    | 1,25 | 4,69E-02 |
| ENSDARG000000045159 | zdhhc4            | 43    | 108   | 1,25 | 4,88E-02 |
| ENSDARG00000104227  | nop10             | 67    | 165   | 1,24 | 4,47E-02 |
| ENSDARG00000071500  | fam207a           | 36    | 89    | 1,24 | 4,98E-02 |
| ENSDARG00000094833  | coa5              | 91    | 226   | 1,24 | 4,69E-02 |
| ENSDARG00000071306  | gip               | 1     | 483   | 1,23 | 1,51E-02 |
| ENSDARG00000092677  | coa6              | 70    | 171   | 1,23 | 3,15E-02 |
| ENSDARG00000013966  | psma6b            | 112   | 277   | 1,23 | 4,98E-02 |
| ENSDARG00000021753  | ccdc25            | 222   | 533   | 1,23 | 1,12E-02 |
| ENSDARG00000013478  | rrp15             | 43    | 105   | 1,22 | 3,58E-02 |
| ENSDARG00000009640  | psmb1             | 707   | 1714  | 1,22 | 3,47E-02 |
| ENSDARG00000028198  | ube2v2            | 723   | 1752  | 1,22 | 3,96E-02 |
| ENSDARG00000102846  | trmt13            | 16    | 40    | 1,21 | 4,64E-02 |
| ENSDARG00000104058  | si:dkey-31c13.1   | 26    | 62    | 1,20 | 3,15E-02 |
| ENSDARG00000099667  | snrpg             | 106   | 256   | 1,20 | 4,32E-02 |
| ENSDARG00000012222  | nup35             | 54    | 127   | 1,19 | 1,30E-02 |
| ENSDARG00000045797  | si:ch211-68a17.7  | 115   | 273   | 1,19 | 4,62E-02 |
| ENSDARG00000006567  | dus4l             | 28    | 66    | 1,19 | 3,61E-02 |
| ENSDARG00000000760  | znf511            | 44    | 104   | 1,19 | 3,58E-02 |
| ENSDARG00000067777  | zgc:158640        | 37    | 89    | 1,19 | 4,40E-02 |
| ENSDARG00000011272  | uqcc2             | 131   | 311   | 1,18 | 4,32E-02 |
| ENSDARG00000025326  | myl12.2           | 762   | 1784  | 1,18 | 4,32E-02 |
| ENSDARG00000070985  | mrps21            | 82    | 194   | 1,18 | 4,24E-02 |
| ENSDARG00000059725  | hypk              | 185   | 433   | 1,18 | 3,69E-02 |
| ENSDARG00000042825  | rnf169            | 78    | 182   | 1,17 | 2,48E-02 |
| ENSDARG00000068305  | mrps14            | 238   | 555   | 1,17 | 3,58E-02 |
| ENSDARG00000030537  | psmc1a            | 319   | 740   | 1,17 | 2,83E-02 |
| ENSDARG00000033171  | trappc6bl         | 62    | 142   | 1,17 | 2,91E-02 |
| ENSDARG00000100585  | coa3a             | 143   | 336   | 1,17 | 4,97E-02 |
| ENSDARG00000042345  | si:dkeyp-55f12.3  | 88    | 208   | 1,17 | 4,98E-02 |
| ENSDARG00000024920  | tmem136a          | 42    | 99    | 1,17 | 2,81E-02 |
| ENSDARG00000103101  | NDUFC1            | 251   | 581   | 1,17 | 3,30E-02 |
| ENSDARG00000071013  | arl6ip6           | 120   | 275   | 1,17 | 2,36E-02 |
| ENSDARG00000020841  | rbm7              | 21    | 48    | 1,16 | 4,88E-02 |
| ENSDARG000000070824 | ndufb5            | 224   | 519   | 1,16 | 4,50E-02 |
| ENSDARG00000075129  | mrps11            | 65    | 150   | 1,15 | 4,01E-02 |
| ENSDARG00000031981  | pcbd1             | 439   | 996   | 1,15 | 2,76E-02 |
| ENSDARG00000006074  | uck2a             | 120   | 274   | 1,15 | 2,81E-02 |
| ENSDARG00000027899  | sem1              | 485   | 1105  | 1,15 | 2,81E-02 |
| ENSDARG00000008020  | med31             | 100   | 226   | 1,15 | 1,12E-02 |
| ENSDARG00000052020  | cmtm4             | 141   | 321   | 1,15 | 3,88E-02 |
| ENSDARG00000070037  | rgs8              | 365   | 826   | 1,15 | 4,64E-02 |
| ENSDARG00000002967  | pdap1b            | 137   | 312   | 1,15 | 3,38E-02 |
| ENSDARG00000003757  | cnpy1             | 884   | 2016  | 1,14 | 4,32E-02 |
| ENSDARG00000039958  | utp11l            | 64    | 147   | 1,14 | 3,93E-02 |
| ENSDARG00000071468  | mrpl54            | 76    | 172   | 1,14 | 3,45E-02 |
| ENSDARG00000014165  | ssr3              | 811   | 1838  | 1,13 | 4,23E-02 |
| ENSDARG00000111714  | zgc:112271        | 91    | 206   | 1,13 | 4,59E-02 |
| ENSDARG00000045843  | apex1             | 47    | 106   | 1,13 | 2,81E-02 |
| ENSDARG00000069671  | maip1             | 71    | 159   | 1,13 | 3,69E-02 |
| ENSDARG00000012603  | elf3ja            | 92    | 206   | 1,11 | 4,64E-02 |
| ENSDARG00000037932  | lin7b             | 117   | 259   | 1,11 | 4,24E-02 |
| ENSDARG00000024465  | mrps18a           | 144   | 319   | 1,11 | 3,64E-02 |
| ENSDARG00000035678  | zgc:91910         | 341   | 751   | 1,11 | 2,81E-02 |
| ENSDARG00000014536  | pfdn1             | 190   | 422   | 1,11 | 4,32E-02 |
| ENSDARG00000063924  | mt-cyb            | 14766 | 32251 | 1,10 | 2,44E-02 |
| ENSDARG00000043857  | ufm1              | 629   | 1398  | 1,10 | 4,69E-02 |
| ENSDARG00000099309  | si:zfoss-169g10.3 | 153   | 336   | 1,10 | 4,11E-02 |
| ENSDARG00000091001  | mycbp             | 179   | 392   | 1,10 | 3,30E-02 |

|                    |                  |      |      |       |          |
|--------------------|------------------|------|------|-------|----------|
| ENSDARG00000043865 | timmm9           | 44   | 99   | 1,10  | 4,98E-02 |
| ENSDARG00000104901 | ostc             | 572  | 1257 | 1,10  | 3,41E-02 |
| ENSDARG00000011841 | atp5l            | 730  | 1619 | 1,10  | 4,97E-02 |
| ENSDARG00000026482 | arhgap12b        | 320  | 697  | 1,09  | 4,29E-02 |
| ENSDARG00000012450 | vmp1             | 280  | 605  | 1,09  | 2,05E-03 |
| ENSDARG00000068436 | h3f3b.1          | 305  | 671  | 1,09  | 4,64E-02 |
| ENSDARG00000037962 | psmb7            | 603  | 1318 | 1,09  | 4,12E-02 |
| ENSDARG00000028379 | trub2            | 62   | 136  | 1,09  | 4,99E-02 |
| ENSDARG00000004527 | pin4             | 106  | 230  | 1,09  | 3,69E-02 |
| ENSDARG00000070916 | dnajc27          | 27   | 59   | 1,08  | 4,99E-02 |
| ENSDARG00000018562 | cope             | 1308 | 2846 | 1,08  | 3,83E-02 |
| ENSDARG00000037260 | toporsa          | 40   | 89   | 1,08  | 4,71E-02 |
| ENSDARG00000069241 | ttc32            | 56   | 122  | 1,07  | 4,96E-02 |
| ENSDARG00000005251 | rpe              | 219  | 469  | 1,07  | 4,23E-02 |
| ENSDARG00000036704 | tmem18           | 154  | 328  | 1,07  | 1,12E-02 |
| ENSDARG00000094191 | nup37            | 48   | 103  | 1,07  | 4,59E-02 |
| ENSDARG00000035146 | polr2j           | 57   | 124  | 1,07  | 4,22E-02 |
| ENSDARG00000071426 | lrrc59           | 122  | 265  | 1,07  | 4,97E-02 |
| ENSDARG00000067593 | sco1             | 94   | 200  | 1,06  | 4,29E-02 |
| ENSDARG00000063341 | si:ch211-284b7.3 | 209  | 447  | 1,05  | 4,69E-02 |
| ENSDARG00000097696 | si:ch73-71c20.5  | 151  | 323  | 1,05  | 4,68E-02 |
| ENSDARG00000053070 | gosr2            | 300  | 636  | 1,05  | 3,69E-02 |
| ENSDARG00000095086 | cfdp1            | 46   | 100  | 1,05  | 4,64E-02 |
| ENSDARG00000095273 | cox8a            | 437  | 932  | 1,05  | 4,32E-02 |
| ENSDARG00000032369 | btbd6b           | 648  | 1364 | 1,05  | 4,74E-02 |
| ENSDARG00000098355 | atp5pd           | 976  | 2069 | 1,05  | 4,40E-02 |
| ENSDARG00000002690 | rabif            | 107  | 226  | 1,05  | 4,40E-02 |
| ENSDARG00000098942 | rp9              | 85   | 180  | 1,04  | 2,85E-02 |
| ENSDARG00000039872 | lamtor2          | 246  | 519  | 1,04  | 4,12E-02 |
| ENSDARG00000035985 | fam210aa         | 235  | 490  | 1,04  | 8,02E-03 |
| ENSDARG00000040966 | zgc:113149       | 47   | 99   | 1,04  | 4,99E-02 |
| ENSDARG00000035663 | zgc:103438       | 125  | 261  | 1,03  | 4,32E-02 |
| ENSDARG00000022795 | golt1ba          | 77   | 162  | 1,03  | 4,69E-02 |
| ENSDARG00000035860 | rps28            | 747  | 1563 | 1,03  | 4,64E-02 |
| ENSDARG00000092873 | zgc:193541       | 545  | 1137 | 1,03  | 4,68E-02 |
| ENSDARG00000116835 | park7            | 544  | 1131 | 1,03  | 4,41E-02 |
| ENSDARG00000011555 | spag7            | 83   | 171  | 1,02  | 2,36E-02 |
| ENSDARG00000003573 | dctn5            | 197  | 407  | 1,02  | 2,81E-02 |
| ENSDARG00000038030 | rbx1             | 377  | 781  | 1,02  | 3,30E-02 |
| ENSDARG00000087456 | NDUFB1           | 345  | 709  | 1,01  | 2,72E-02 |
| ENSDARG00000005738 | rpf1             | 118  | 245  | 1,01  | 4,38E-02 |
| ENSDARG00000115557 | cox7b            | 1002 | 2068 | 1,01  | 4,62E-02 |
| ENSDARG00000029252 | ssb              | 58   | 119  | 1,01  | 4,32E-02 |
| ENSDARG00000015236 | pycr3            | 32   | 67   | 1,01  | 4,25E-02 |
| ENSDARG00000018334 | rpl35            | 1003 | 2068 | 1,01  | 4,69E-02 |
| ENSDARG00000113503 | CU459094.2       | 58   | 119  | 1,01  | 2,57E-02 |
| ENSDARG00000105036 | arl6ip4          | 77   | 157  | 1,00  | 4,24E-02 |
| ENSDARG00000013075 | mrpl11           | 133  | 273  | 1,00  | 4,88E-02 |
| ENSDARG00000078822 | ccdc18           | 124  | 60   | -1,01 | 4,51E-02 |
| ENSDARG00000087573 | hdac11           | 252  | 124  | -1,01 | 5,64E-03 |
| ENSDARG00000020759 | elf1             | 1747 | 842  | -1,01 | 4,64E-02 |
| ENSDARG00000098304 | taok1b           | 290  | 142  | -1,01 | 3,30E-02 |
| ENSDARG00000061504 | kdm4c            | 836  | 404  | -1,01 | 4,40E-02 |
| ENSDARG00000010281 | xpo4             | 145  | 69   | -1,02 | 4,41E-02 |
| ENSDARG00000107385 | aars2            | 179  | 85   | -1,02 | 4,71E-02 |
| ENSDARG00000030824 | esyt2a           | 304  | 147  | -1,03 | 4,23E-02 |
| ENSDARG00000098783 | polr2b           | 329  | 157  | -1,03 | 3,62E-02 |
| ENSDARG00000023694 | spon1b           | 6256 | 3012 | -1,03 | 1,27E-02 |
| ENSDARG00000023920 | llgl2            | 374  | 181  | -1,03 | 1,47E-02 |
| ENSDARG00000037593 | prickle2b        | 1070 | 508  | -1,03 | 4,32E-02 |
| ENSDARG00000006094 | igf2r            | 595  | 284  | -1,04 | 4,40E-02 |
| ENSDARG00000062055 | rnf38            | 366  | 175  | -1,04 | 4,41E-02 |
| ENSDARG00000102252 | USP34            | 850  | 402  | -1,04 | 4,71E-02 |

|                     |                   |      |      |       |          |
|---------------------|-------------------|------|------|-------|----------|
| ENSDARG00000060835  | tecpr2            | 272  | 128  | -1,04 | 3,69E-02 |
| ENSDARG00000062020  | gse1              | 282  | 136  | -1,05 | 2,81E-02 |
| ENSDARG00000000966  | ncor2             | 4415 | 2082 | -1,05 | 4,32E-02 |
| ENSDARG00000070371  | kat7a             | 435  | 205  | -1,05 | 4,89E-02 |
| ENSDARG00000026548  | cyp2u1            | 210  | 98   | -1,05 | 4,69E-02 |
| ENSDARG00000063352  | inpp4aa           | 280  | 132  | -1,05 | 4,29E-02 |
| ENSDARG00000104435  | si:ch73-217b7.1   | 372  | 175  | -1,06 | 2,91E-02 |
| ENSDARG00000075670  | rereb             | 549  | 256  | -1,07 | 4,59E-02 |
| ENSDARG00000113393  | CABZ01080601.1    | 192  | 89   | -1,07 | 4,38E-02 |
| ENSDARG00000074702  | arfgef2           | 483  | 224  | -1,07 | 3,54E-02 |
| ENSDARG00000053200  | dis3l             | 88   | 40   | -1,08 | 4,06E-02 |
| ENSDARG00000013224  | phc2b             | 85   | 39   | -1,08 | 4,56E-02 |
| ENSDARG00000069970  | lingo2b           | 478  | 219  | -1,08 | 3,41E-02 |
| ENSDARG00000016830  | rimkla            | 389  | 178  | -1,09 | 3,88E-02 |
| ENSDARG00000061378  | smg8              | 166  | 76   | -1,09 | 2,46E-02 |
| ENSDARG00000041702  | rfx6              | 2696 | 1222 | -1,09 | 4,03E-02 |
| ENSDARG00000069208  | stx7l             | 131  | 59   | -1,10 | 4,32E-02 |
| ENSDARG00000036442  | atp11c            | 332  | 151  | -1,11 | 2,21E-02 |
| ENSDARG00000092359  | si:dkeyp-113d7.10 | 94   | 43   | -1,12 | 2,21E-02 |
| ENSDARG00000018296  | rev1              | 196  | 88   | -1,12 | 4,41E-02 |
| ENSDARG00000099449  | atrxl             | 344  | 154  | -1,12 | 2,81E-02 |
| ENSDARG00000037066  | lgals8a           | 77   | 34   | -1,13 | 4,06E-02 |
| ENSDARG00000079104  | mphas1            | 365  | 160  | -1,14 | 4,42E-02 |
| ENSDARG00000062553  | bach1a            | 225  | 99   | -1,15 | 4,62E-02 |
| ENSDARG00000098592  | zgc:92140         | 344  | 151  | -1,15 | 3,49E-02 |
| ENSDARG00000061282  | glg1a             | 1704 | 736  | -1,16 | 4,32E-02 |
| ENSDARG00000004336  | exoc4             | 784  | 338  | -1,16 | 4,29E-02 |
| ENSDARG00000076895  | flrt3             | 1589 | 679  | -1,17 | 4,69E-02 |
| ENSDARG00000103361  | tshz3b            | 851  | 364  | -1,18 | 4,23E-02 |
| ENSDARG00000074169  | gpam              | 260  | 111  | -1,18 | 3,83E-02 |
| ENSDARG00000063007  | apc2              | 666  | 284  | -1,19 | 3,58E-02 |
| ENSDARG00000062258  | armc8             | 151  | 64   | -1,19 | 2,52E-02 |
| ENSDARG00000056165  | si:ch211-215a10.4 | 174  | 72   | -1,20 | 4,62E-02 |
| ENSDARG00000076943  | lhfp14b           | 250  | 104  | -1,20 | 4,50E-02 |
| ENSDARG00000074558  | cntnap2b          | 536  | 223  | -1,21 | 4,99E-02 |
| ENSDARG00000061021  | fam160a1a         | 136  | 56   | -1,21 | 4,32E-02 |
| ENSDARG00000098909  | SHC3              | 194  | 80   | -1,22 | 4,64E-02 |
| ENSDARG00000103390  | cacna2d2a         | 1930 | 779  | -1,22 | 4,89E-02 |
| ENSDARG000000035655 | rad21b            | 162  | 67   | -1,22 | 4,62E-02 |
| ENSDARG00000089357  | miga2             | 155  | 63   | -1,23 | 4,69E-02 |
| ENSDARG00000010023  | CU856539.1        | 616  | 252  | -1,23 | 4,24E-02 |
| ENSDARG00000087921  | plce1             | 1181 | 478  | -1,24 | 4,62E-02 |
| ENSDARG00000104101  | si:ch73-287m6.1   | 643  | 261  | -1,24 | 3,38E-02 |
| ENSDARG00000073905  | zgc:92481         | 175  | 70   | -1,25 | 4,69E-02 |
| ENSDARG00000060257  | zranb1a           | 504  | 206  | -1,27 | 3,44E-03 |
| ENSDARG00000063253  | hecw2b            | 77   | 31   | -1,27 | 2,31E-02 |
| ENSDARG00000069006  | tle3b             | 690  | 271  | -1,28 | 3,54E-02 |
| ENSDARG00000077656  | arfgef3           | 3627 | 1404 | -1,29 | 4,59E-02 |
| ENSDARG00000026784  | robo1             | 1453 | 577  | -1,29 | 2,22E-02 |
| ENSDARG00000061656  | ptpdc1a           | 91   | 36   | -1,29 | 1,83E-02 |
| ENSDARG00000021405  | chd3              | 425  | 168  | -1,29 | 3,06E-02 |
| ENSDARG00000090844  | CABZ01054965.1    | 211  | 81   | -1,30 | 4,98E-02 |
| ENSDARG00000103288  | PDPR              | 201  | 79   | -1,30 | 2,01E-02 |
| ENSDARG00000034893  | rarab             | 172  | 67   | -1,31 | 1,47E-02 |
| ENSDARG00000078924  | tmco4             | 68   | 25   | -1,31 | 4,44E-02 |
| ENSDARG00000059870  | clk2b             | 150  | 57   | -1,31 | 3,26E-02 |
| ENSDARG00000035452  | camkk1a           | 542  | 212  | -1,31 | 1,69E-02 |
| ENSDARG00000105056  | znf45l            | 43   | 16   | -1,32 | 4,64E-02 |
| ENSDARG00000000324  | dcaf8             | 194  | 73   | -1,32 | 4,20E-02 |
| ENSDARG00000088689  | si:ch211-201o1.1  | 276  | 108  | -1,32 | 1,91E-02 |
| ENSDARG00000103746  | mapkbp1           | 129  | 48   | -1,34 | 4,79E-02 |
| ENSDARG00000101270  | klhl8             | 190  | 71   | -1,34 | 2,81E-02 |
| ENSDARG00000059557  | xylt2             | 123  | 46   | -1,35 | 4,41E-02 |

|                     |                    |      |     |       |          |
|---------------------|--------------------|------|-----|-------|----------|
| ENSDARG00000008209  | myt1la             | 89   | 34  | -1,35 | 4,98E-02 |
| ENSDARG00000052658  | pptc7b             | 176  | 66  | -1,36 | 3,45E-02 |
| ENSDARG00000043332  | prkcz              | 340  | 128 | -1,36 | 2,48E-02 |
| ENSDARG00000093093  | adam17b            | 458  | 169 | -1,36 | 3,44E-02 |
| ENSDARG00000054186  | ncs1b              | 158  | 57  | -1,38 | 3,15E-02 |
| ENSDARG00000098405  | map3k1             | 488  | 176 | -1,38 | 4,41E-02 |
| ENSDARG000000062812 | glsa               | 1103 | 396 | -1,39 | 3,69E-02 |
| ENSDARG00000036096  | smad3a             | 255  | 93  | -1,39 | 3,58E-02 |
| ENSDARG00000018179  | acvrl1             | 87   | 32  | -1,40 | 2,36E-02 |
| ENSDARG00000089292  | adgrl1a            | 206  | 72  | -1,40 | 4,72E-02 |
| ENSDARG00000062325  | shank2             | 266  | 96  | -1,41 | 2,36E-02 |
| ENSDARG00000103792  | CABZ01076737.1     | 143  | 51  | -1,41 | 3,06E-02 |
| ENSDARG00000035660  | si:ch211-193k19.1  | 703  | 251 | -1,42 | 2,57E-02 |
| ENSDARG00000052094  | notch1b            | 727  | 250 | -1,43 | 4,32E-02 |
| ENSDARG00000086990  | carmil3            | 731  | 259 | -1,43 | 2,01E-02 |
| ENSDARG00000060018  | si:ch1073-44g3.1   | 61   | 21  | -1,44 | 4,71E-02 |
| ENSDARG00000006272  | mpp5a              | 181  | 62  | -1,44 | 4,23E-02 |
| ENSDARG00000043858  | cdk19              | 58   | 20  | -1,45 | 3,26E-02 |
| ENSDARG00000062177  | dcblid2            | 743  | 259 | -1,46 | 1,91E-02 |
| ENSDARG00000104295  | arhgap21a          | 783  | 277 | -1,46 | 3,68E-03 |
| ENSDARG00000079616  | cramp1             | 309  | 106 | -1,49 | 1,73E-02 |
| ENSDARG00000100456  | ptk2aa             | 162  | 55  | -1,49 | 2,67E-02 |
| ENSDARG000000069014 | nphp4              | 311  | 104 | -1,49 | 2,52E-02 |
| ENSDARG00000100854  | ago4               | 215  | 72  | -1,49 | 2,44E-02 |
| ENSDARG00000113064  | CR392045.1         | 186  | 60  | -1,51 | 4,99E-02 |
| ENSDARG00000100708  | jakmip3            | 85   | 28  | -1,52 | 2,34E-02 |
| ENSDARG00000052978  | mbnl1              | 653  | 212 | -1,52 | 3,58E-02 |
| ENSDARG00000037894  | ezh1               | 105  | 33  | -1,53 | 4,23E-02 |
| ENSDARG00000077839  | dhx30              | 107  | 34  | -1,53 | 4,23E-02 |
| ENSDARG00000079396  | lrfn5b             | 113  | 36  | -1,53 | 3,19E-02 |
| ENSDARG00000018726  | slco3a1            | 80   | 26  | -1,54 | 4,24E-02 |
| ENSDARG00000077364  | mapk9              | 100  | 31  | -1,54 | 2,81E-02 |
| ENSDARG00000067801  | SEMA4D             | 100  | 32  | -1,55 | 4,59E-02 |
| ENSDARG00000011222  | ccdc28b            | 88   | 28  | -1,55 | 2,62E-02 |
| ENSDARG00000004634  | osbp               | 512  | 157 | -1,56 | 4,40E-02 |
| ENSDARG00000099945  | CU467646.4         | 36   | 11  | -1,57 | 3,88E-02 |
| ENSDARG00000002607  | unm_sa1614         | 1123 | 348 | -1,58 | 2,69E-02 |
| ENSDARG000000113111 | DGKD               | 178  | 55  | -1,59 | 4,32E-02 |
| ENSDARG00000102902  | strn4              | 88   | 27  | -1,59 | 3,93E-02 |
| ENSDARG00000042128  | pacsin1b           | 76   | 23  | -1,60 | 3,88E-02 |
| ENSDARG00000063310  | oxr1b              | 638  | 189 | -1,61 | 3,83E-02 |
| ENSDARG00000036826  | ankrd52a           | 157  | 48  | -1,62 | 2,81E-02 |
| ENSDARG00000001014  | myh9b              | 394  | 116 | -1,62 | 4,68E-02 |
| ENSDARG00000059411  | impa2              | 301  | 93  | -1,63 | 7,94E-03 |
| ENSDARG00000011333  | arhgap33           | 135  | 40  | -1,64 | 3,88E-02 |
| ENSDARG00000027159  | fbxo28             | 398  | 114 | -1,64 | 4,32E-02 |
| ENSDARG00000071032  | pnkd               | 42   | 12  | -1,66 | 3,37E-02 |
| ENSDARG00000077162  | nwd2               | 69   | 21  | -1,67 | 2,46E-02 |
| ENSDARG00000018553  | ifih1              | 90   | 26  | -1,67 | 3,45E-02 |
| ENSDARG00000063568  | syt7a              | 571  | 153 | -1,72 | 4,51E-02 |
| ENSDARG00000077022  | fam131a            | 101  | 28  | -1,73 | 1,95E-02 |
| ENSDARG00000075173  | si:ch1073-322p19.1 | 80   | 21  | -1,74 | 4,98E-02 |
| ENSDARG00000058771  | nav1b              | 179  | 47  | -1,76 | 4,72E-02 |
| ENSDARG00000030289  | jag1a              | 128  | 33  | -1,79 | 4,12E-02 |
| ENSDARG00000062220  | plekha7b           | 131  | 36  | -1,81 | 3,62E-03 |
| ENSDARG00000098031  | si:ch73-144d13.8   | 23   | 6   | -1,81 | 4,32E-02 |
| ENSDARG00000102234  | si:ch211-71n6.4    | 216  | 55  | -1,82 | 2,83E-02 |
| ENSDARG00000044436  | rps6ka4            | 83   | 22  | -1,85 | 1,12E-02 |
| ENSDARG00000092067  | atn1               | 66   | 16  | -1,86 | 4,23E-02 |
| ENSDARG00000100587  | si:ch211-235i11.7  | 41   | 9   | -1,89 | 2,01E-02 |
| ENSDARG00000003655  | tmem59l            | 331  | 79  | -1,89 | 4,12E-02 |
| ENSDARG00000053535  | lmo7b              | 41   | 9   | -1,90 | 4,50E-02 |
| ENSDARG00000056181  | ncam1a             | 494  | 119 | -1,92 | 2,46E-02 |

|                    |                   |       |      |       |          |
|--------------------|-------------------|-------|------|-------|----------|
| ENSDARG00000079547 | zbtb47b           | 78    | 17   | -1,94 | 4,64E-02 |
| ENSDARG00000045023 | lhfp15a           | 57    | 13   | -1,97 | 1,51E-02 |
| ENSDARG00000020845 | tns1b             | 1300  | 303  | -1,99 | 4,07E-03 |
| ENSDARG00000063580 | ppp1r9ala         | 70    | 16   | -2,00 | 1,47E-02 |
| ENSDARG00000055752 | npas4a            | 3702  | 814  | -2,01 | 2,52E-02 |
| ENSDARG00000074034 | si:dkey-91i10.2   | 30    | 6    | -2,02 | 2,81E-02 |
| ENSDARG00000079414 | sez6b             | 848   | 162  | -2,02 | 4,32E-02 |
| ENSDARG00000018382 | prkcha            | 44    | 8    | -2,04 | 4,74E-02 |
| ENSDARG00000103903 | LO017650.1        | 60    | 11   | -2,04 | 4,99E-02 |
| ENSDARG00000016749 | slco1c1           | 40    | 8    | -2,05 | 4,94E-02 |
| ENSDARG00000077799 | egr4              | 12118 | 2579 | -2,07 | 1,27E-02 |
| ENSDARG00000079251 | nlgn2b            | 207   | 44   | -2,09 | 1,12E-02 |
| ENSDARG00000089156 | egr3              | 47    | 10   | -2,11 | 4,40E-02 |
| ENSDARG00000056797 | ppp2r2ca          | 101   | 20   | -2,13 | 1,60E-02 |
| ENSDARG00000102277 | lama1             | 30    | 5    | -2,16 | 4,69E-02 |
| ENSDARG00000055459 | dlgap3            | 91    | 15   | -2,17 | 4,32E-02 |
| ENSDARG00000054323 | pparab            | 68    | 14   | -2,20 | 5,64E-03 |
| ENSDARG00000014652 | ankrd13b          | 70    | 13   | -2,21 | 2,22E-02 |
| ENSDARG00000087529 | zgc:85936         | 37    | 7    | -2,22 | 2,35E-02 |
| ENSDARG00000089860 | atxn7l1           | 149   | 28   | -2,22 | 8,98E-03 |
| ENSDARG00000035875 | tmem54b           | 523   | 87   | -2,23 | 2,65E-02 |
| ENSDARG00000059534 | si:ch211-146m13.3 | 72    | 13   | -2,26 | 4,44E-03 |
| ENSDARG00000102111 | zbtb49            | 27    | 4    | -2,27 | 3,47E-02 |
| ENSDARG00000079581 | nyap2a            | 105   | 16   | -2,32 | 2,69E-02 |
| ENSDARG00000051915 | pde5ab            | 82    | 13   | -2,35 | 2,62E-02 |
| ENSDARG00000079519 | CR456624.1        | 69    | 11   | -2,38 | 2,21E-02 |
| ENSDARG00000058558 | lzt3b             | 41    | 5    | -2,50 | 4,30E-02 |
| ENSDARG00000054036 | rnf34b            | 82    | 10   | -2,57 | 2,44E-02 |
| ENSDARG00000032795 | tmem8a            | 175   | 20   | -2,66 | 2,91E-02 |
| ENSDARG00000106564 | CT027676.1        | 216   | 25   | -2,66 | 2,46E-02 |
| ENSDARG00000109783 | igsf11            | 26    | 3    | -2,74 | 1,61E-02 |
| ENSDARG00000105210 | etf1a             | 39    | 3    | -2,82 | 4,32E-02 |
| ENSDARG00000076127 | gabrb1            | 88    | 5    | -2,86 | 4,75E-02 |
| ENSDARG00000044098 | egr2a             | 89    | 8    | -2,94 | 2,18E-02 |
| ENSDARG00000079252 | fam117ab          | 20    | 1    | -3,02 | 2,49E-02 |
| ENSDARG00000004586 | ntrk1             | 60    | 3    | -3,25 | 3,88E-02 |
| ENSDARG00000013838 | sulf2b            | 136   | 8    | -3,47 | 3,68E-03 |
| ENSDARG00000095891 | si:ch73-30l9.1    | 27    | 1    | -3,49 | 1,47E-02 |
| ENSDARG00000070919 | cpne5b            | 55    | 1    | -3,84 | 1,69E-02 |
