# Supplementary material for: A δ-cell subpopulation with a pro-β-cell identity contributes to efficient age-independent recovery in a zebrafish model of diabetes
Source: eLife journal article supplement (doi:10.7554/elife.67576), 2022-01-21
Supplement: supp [file elife-67576-supp-v1.zip › elife_poa_e67576_Figure_6_source_data_3.pdf]

### Figure 6-Source Data 3. GO analysis of genes overexpressed in bihormonal cells

Overrepresented GO in 20 dpt bihormonal cells (versus sst1.1:GFPhigh  $\delta$ -cells) (DESeq FC>2x, Padj<0.05)  
GO identified by WebGestalt (FDR<0.25)

#### Biological Process (non redundant)

| geneSet    | description                          | enrichmentRatio | pValue      | FDR         | userId                                                                                                                        |
|------------|--------------------------------------|-----------------|-------------|-------------|-------------------------------------------------------------------------------------------------------------------------------|
| GO:0006396 | RNA processing                       | 3,635759945     | 2,23E-07    | 6,32E-05    | imp4;srek1ip1;elp6;pop5;lsn4;phf5a;rrs1;tyw3;rp9;rrp15;dus4l;polr3k;arl6ip4;ssb;snrpg;nop10;trmt12;rps28;mettl1;rpl35;fam207a |
| GO:0034660 | ncRNA metabolic process              | 4,725045167     | 5,51E-07    | 7,82E-05    | imp4;elp6;pop5;dtd2;rrs1;tyw3;rrp15;dus4l;polr3k;nop10;trmt12;rps28;mettl1;rpl35;fam207a                                      |
| GO:0022613 | ribonucleoprotein complex biogenesis | 3,6688586       | 1,95E-04    | 0,0185002   | imp4;pop5;lsn4;rrs1;rrp15;snrpg;nop10;eif3ja;rps28;rpl35;fam207a                                                              |
| GO:0009451 | RNA modification                     | 4,58701014      | 0,001917786 | 0,136162841 | elp6;tyw3;dus4l;nop10;trmt12;mettl1                                                                                           |
| GO:0006360 | transcription by RNA polymerase I    | 10,20609756     | 0,002942021 | 0,16710682  | polr1e;cd3eap;polr2k                                                                                                          |

#### KEGG pathways

| geneSet  | description                             | enrichmentRatio | pValue      | FDR         | userId                                                              |
|----------|-----------------------------------------|-----------------|-------------|-------------|---------------------------------------------------------------------|
| dre03050 | Proteasome                              | 8,323033708     | 1,73E-05    | 0,001501437 | psmb4;sem1;psmc1a;psmb1;psmb3;psmb7;psma6b                          |
| dre04115 | p53 signaling pathway                   | 6,742710852     | 2,06E-05    | 0,001501437 | ccnd1;ccng1;igf1;baxa;sesn2;cdk2;gadd45ga;ccnb1                     |
| dre03010 | Ribosome                                | 4,968975348     | 2,78E-05    | 0,001501437 | rps24;mrpl28;mrps14;mrps18a;mrps11;mrps21;rps28;mrpl21;rpl35;mrpl11 |
| dre03020 | RNA polymerase                          | 11,48004649     | 6,10E-05    | 0,002469881 | polr1e;polr3k;polr2j;polr1c;polr2k                                  |
| dre04110 | Cell cycle                              | 4,311211705     | 2,14E-04    | 0,006948751 | ccnd1;cdkn2c;rbx1;e2f5;cdk2;gadd45ga;ccnb1;rb1;mad2l1               |
| dre00240 | Pyrimidine metabolism                   | 4,438951311     | 9,39E-04    | 0,025347892 | polr1e;uck2a;polr3k;polr2j;polr1c;rrm1;polr2k                       |
| dre03440 | Homologous recombination                | 6,658426966     | 0,002875844 | 0,066555238 | rpa2;sem1;rpa3;rad51                                                |
| dre03420 | Nucleotide excision repair              | 6,053115424     | 0,004081581 | 0,073836301 | rpa2;rbx1;rpa3;lig1                                                 |
| dre03430 | Mismatch repair                         | 9,079673136     | 0,004102017 | 0,073836301 | rpa2;rpa3;lig1                                                      |
| dre04114 | Oocyte meiosis                          | 3,353164659     | 0,004666011 | 0,07558938  | ins;igf1;calm3a;rbx1;cdk2;ccnb1;mad2l1                              |
| dre03460 | Fanconi anemia pathway                  | 5,22229566      | 0,006939264 | 0,102196431 | fancg;rpa2;rpa3;rad51                                               |
| dre04068 | FoxO signaling pathway                  | 2,790957411     | 0,012353906 | 0,166777726 | ins;ccnd1;igf1;cdk2;gadd45ga;ccnb1;g6pcb                            |
| dre03030 | DNA replication                         | 5,256652868     | 0,018914894 | 0,235708676 | rpa2;rpa3;lig1                                                      |
| dre04218 | Cellular senescence                     | 2,505859611     | 0,02118965  | 0,245033418 | ccnd1;calm3a;e2f5;cdk2;gadd45ga;ccnb1;rb1                           |
| dre04914 | Progesterone-mediated oocyte maturation | 3,082605077     | 0,022688279 | 0,245033418 | ins;igf1;cdk2;ccnb1;mad2l1                                          |
| dre04623 | Cytosolic DNA-sensing pathway           | 4,756019262     | 0,024662355 | 0,249706349 | polr3k;polr1c;polr2k                                                |
