# Supplementary material for: A δ-cell subpopulation with a pro-β-cell identity contributes to efficient age-independent recovery in a zebrafish model of diabetes
Source: eLife journal article supplement (doi:10.7554/elife.67576), 2022-01-21
Supplement: supp [file elife-67576-supp-v1.zip › elife_poa_e67576_Figure_6_source_data_4.pdf]

**Figure 6-Source Data 4. GO analysis of genes overexpressed in sst1.1:GFPhigh  $\delta$ -cells**

Overrepresented GO in sst1.1:GFPhigh delta-cells (versus 20dpt bihormonal cells) (DESeq FC>2x, Padj<0.05)  
GO identified by WebGestalt (FDR<0.25)

**Biological Process (non redundant)**

no significant BP in the gene set

**KEGG pathways**

| geneSet  | description             | enrichmentRatio | pValue     | FDR        | userId                                        |
|----------|-------------------------|-----------------|------------|------------|-----------------------------------------------|
| dre04330 | Notch signaling pathway | 8,635336976     | 0,00110464 | 0,08990274 | adam17b;jag1a;ncor2;notch1b                   |
| dre04530 | Tight junction          | 4,248028674     | 0,00110991 | 0,08990274 | llgl2;ppp2r2ca;prkcz;mapk9;mpp5a;map3k1;myh9b |
