# Supplementary material for: A δ-cell subpopulation with a pro-β-cell identity contributes to efficient age-independent recovery in a zebrafish model of diabetes
Source: eLife journal article supplement (doi:10.7554/elife.67576), 2022-01-21
Supplement: supp [file elife-67576-supp-v1.zip › elife_poa_e67576_Figure_7_source_data_1.pdf]

Figure 7-Source Data 1

SST+ mCherry+ bihormonal cells in the ductal domain (tail, larvae)

| CTL | NFP |
|-----|-----|
| 1   | 0   |
| 0   | 0   |
| 1   | 1   |
| 0   | 5   |
| 0   | 15  |
| 1   | 2   |
| 0   | 8   |
| 1   | 3   |
| 0   | 0   |
| 2   | 4   |
| 0   | 6   |
| 0   | 23  |
| 0   | 7   |
| 0   | 6   |
| 0   | 9   |
| 0   | 6   |
| 0   | 5   |
| 0   | 19  |
| 0   | 5   |
| 0   | 7   |
|     | 5   |
|     | 2   |
|     | 6   |
|     | 4   |
|     | 7   |
|     | 4   |
