# Supplementary figures and images for: A δ-cell subpopulation with a pro-β-cell identity contributes to efficient age-independent recovery in a zebrafish model of diabetes
Source: eLife journal article supplement (doi:10.7554/elife.67576), 2022-01-21

Figure 6-figure supplement 2

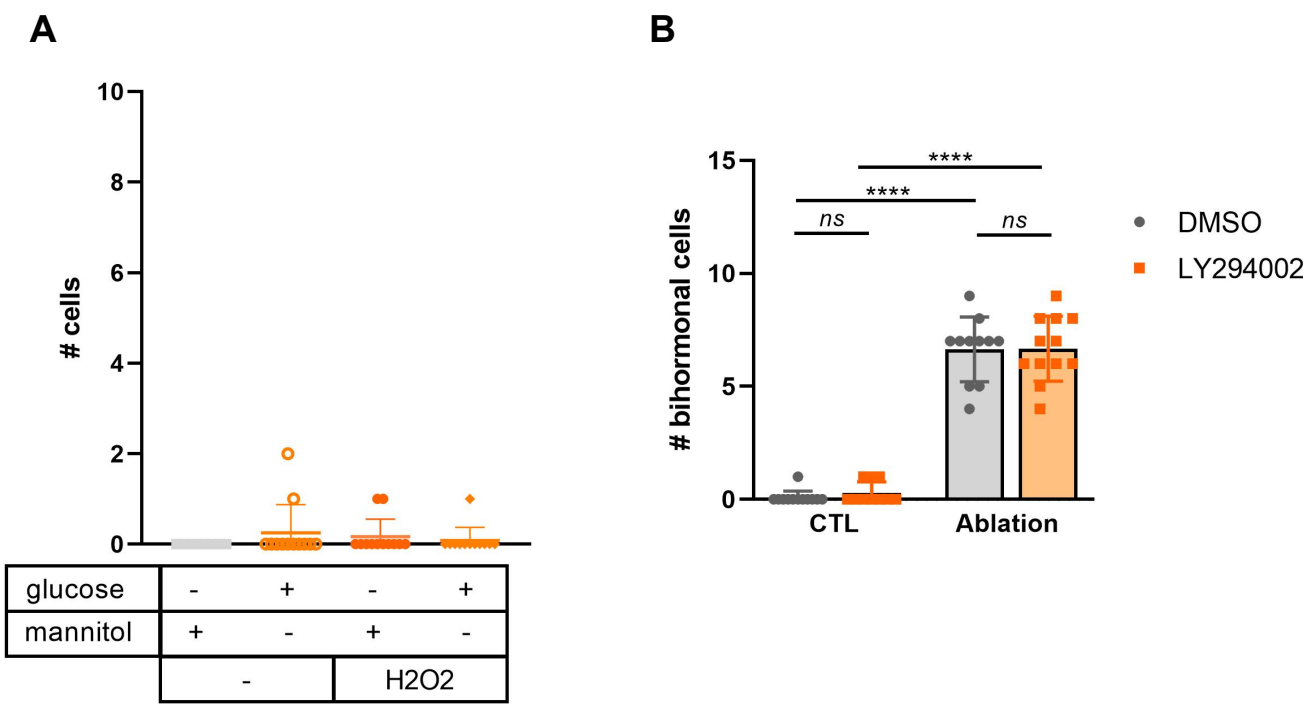

Supplement: supp [file elife-67576-supp-v1.zip]

### Figure 6-figure supplement 1

**A**

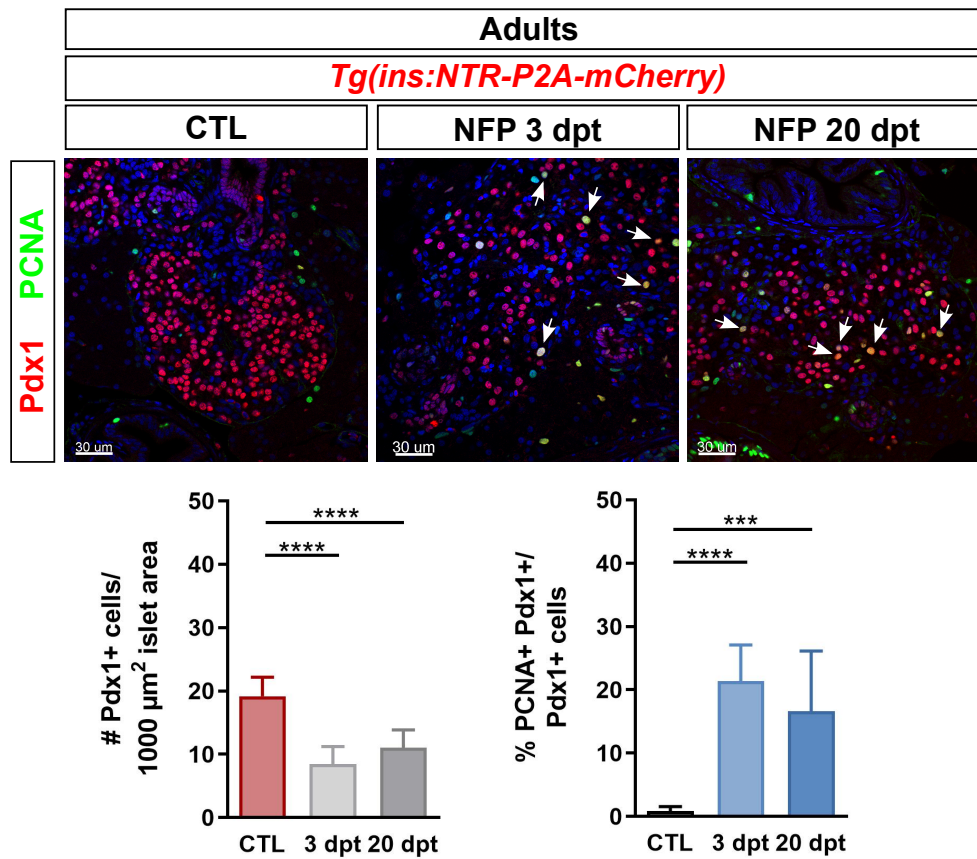

# B

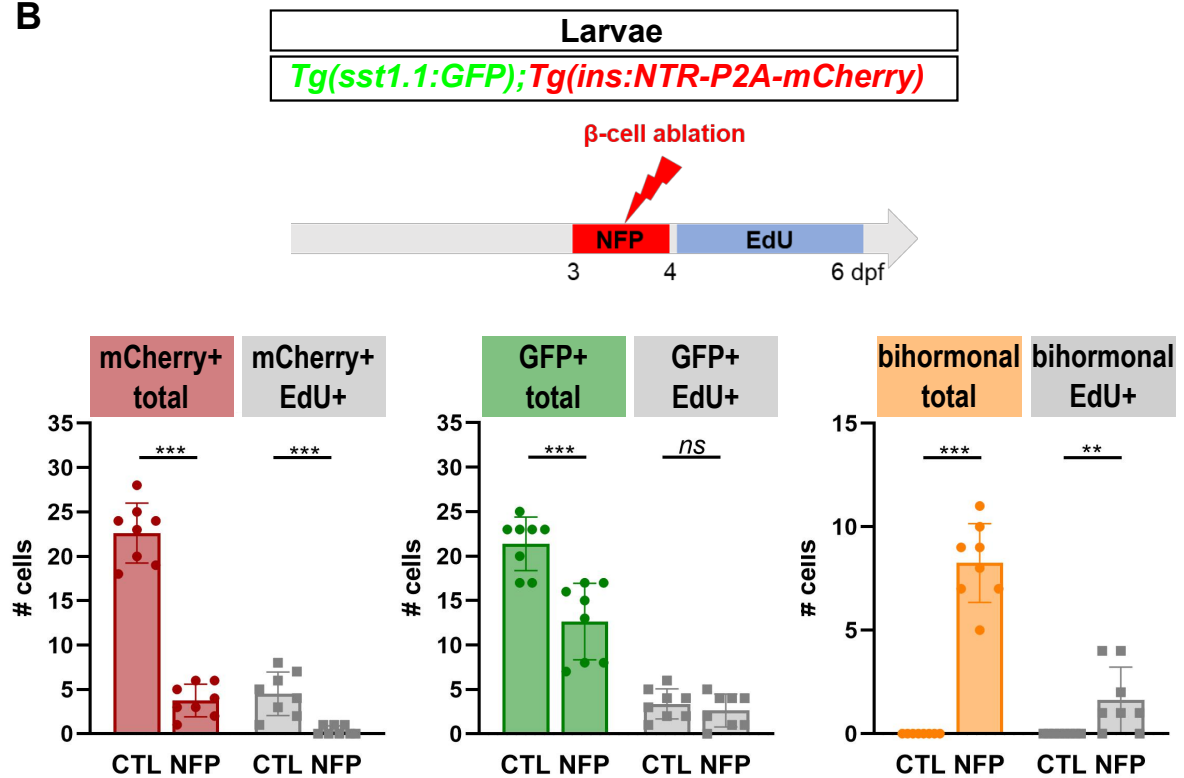

Supplement: supp [file elife-67576-supp-v1.zip]

Figure 1-figure supplement 2

A

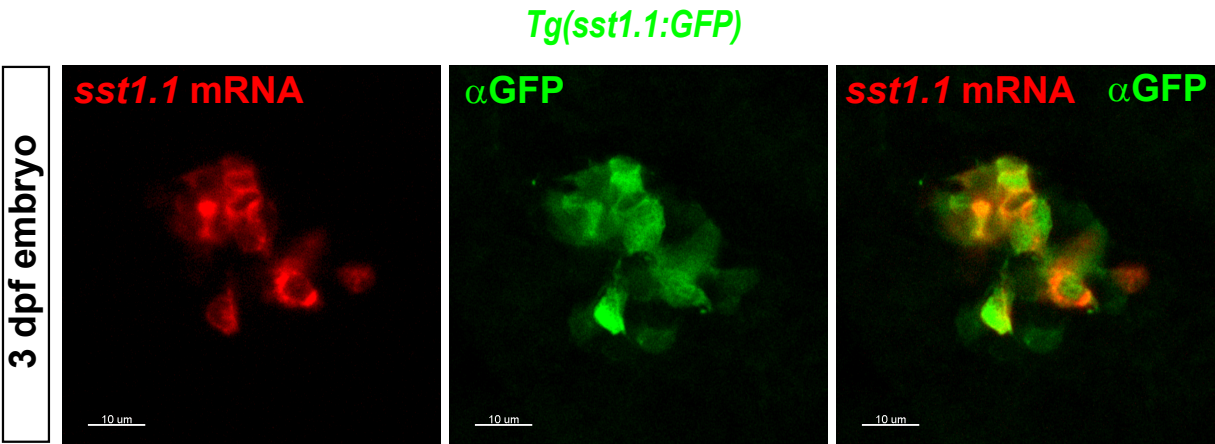

B

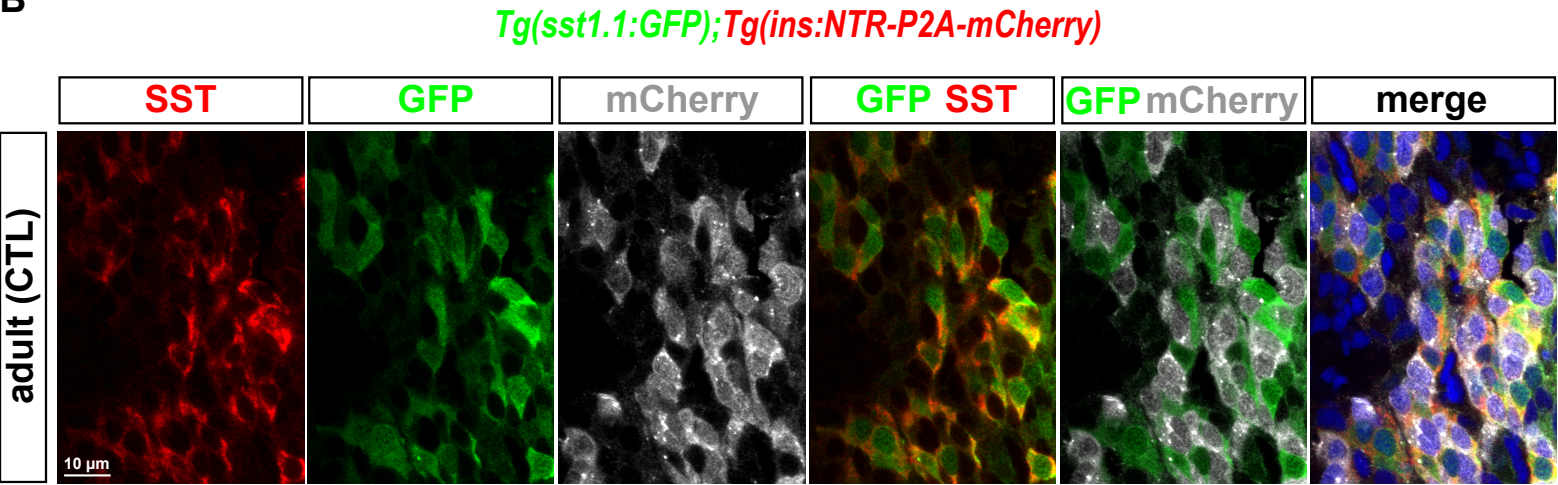

Supplement: supp [file elife-67576-supp-v1.zip › elife_poa_e67576_Figure_1_figure_supplement_2.pdf]

Figure 1-figure supplement 3

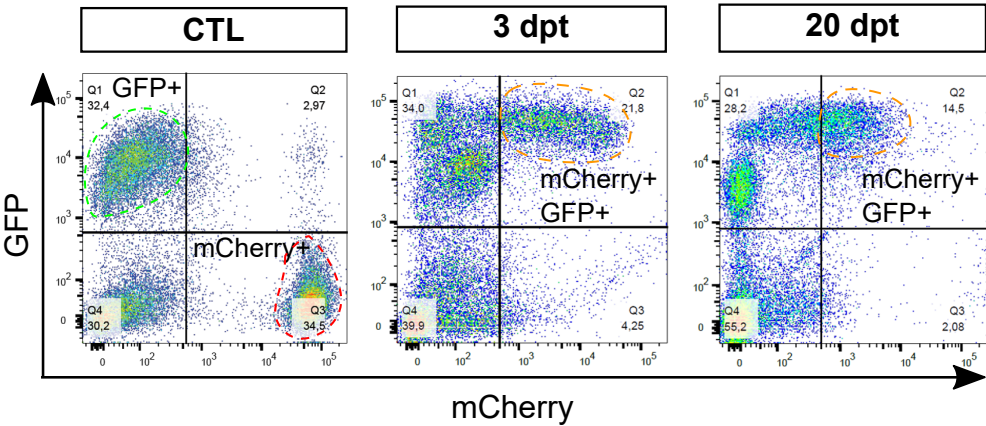

Supplement: supp [file elife-67576-supp-v1.zip › elife_poa_e67576_Figure_1_figure_supplement_3.pdf]

Figure 2-figure supplement 1

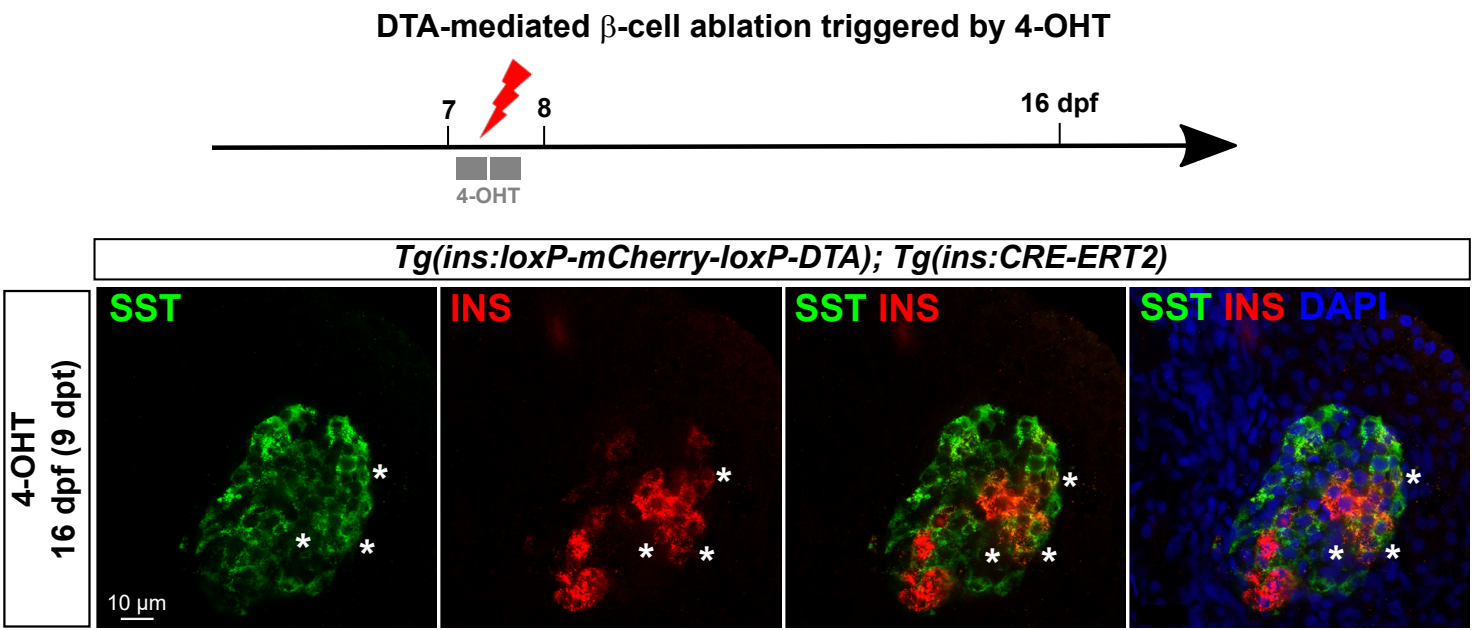

Supplement: supp [file elife-67576-supp-v1.zip › elife_poa_e67576_Figure_2_Figure_supplement_1.pdf]

Figure 3-figure supplement 1

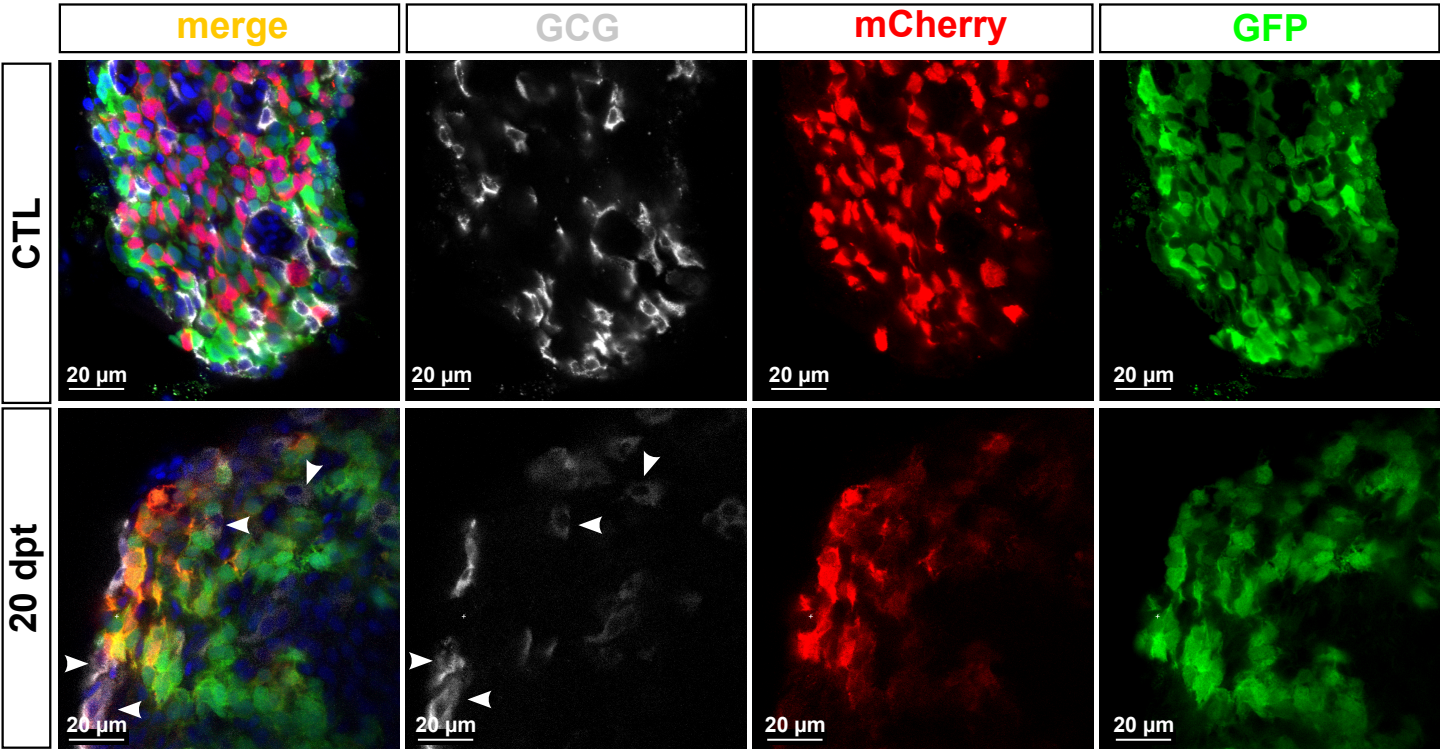

Supplement: supp [file elife-67576-supp-v1.zip › elife_poa_e67576_Figure_3_Figure_supplement_1.pdf]

Figure 5-figure supplement 1

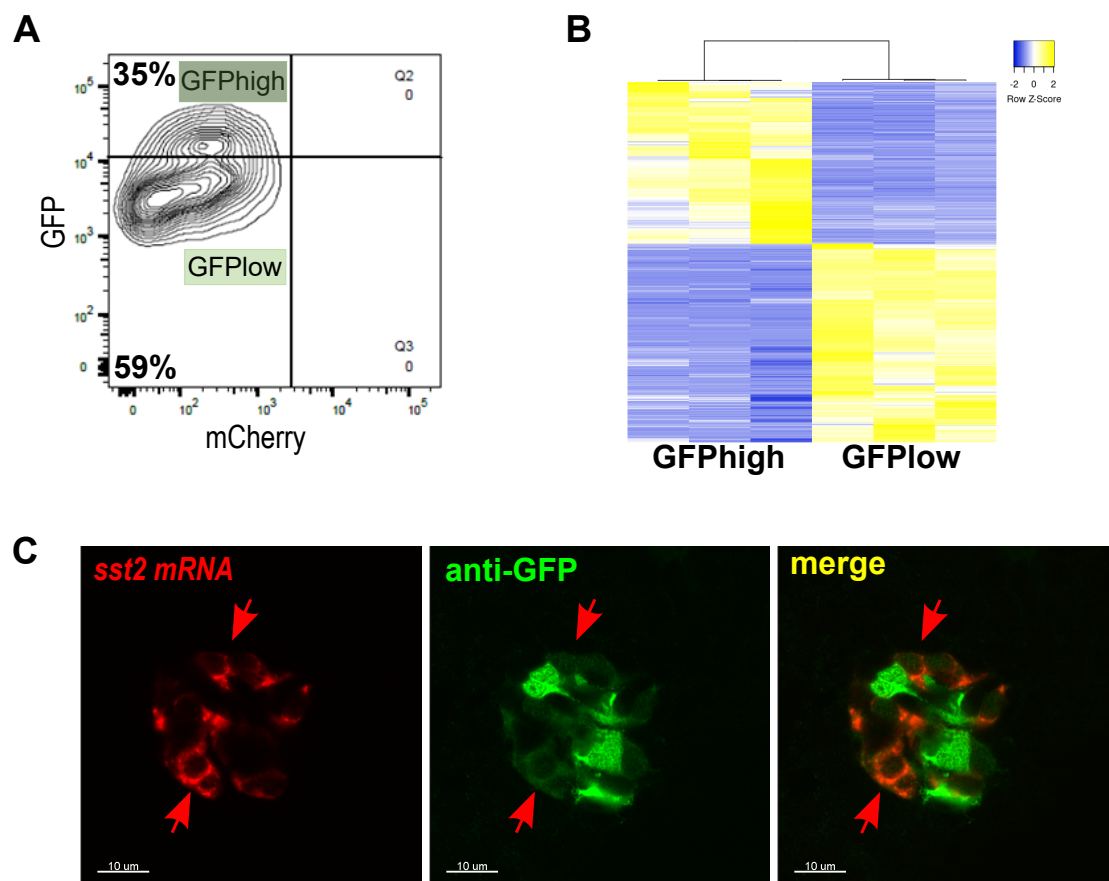

Supplement: supp [file elife-67576-supp-v1.zip › elife_poa_e67576_Figure_5_figure_supplement_1.pdf]

Figure 7-figure supplement 1

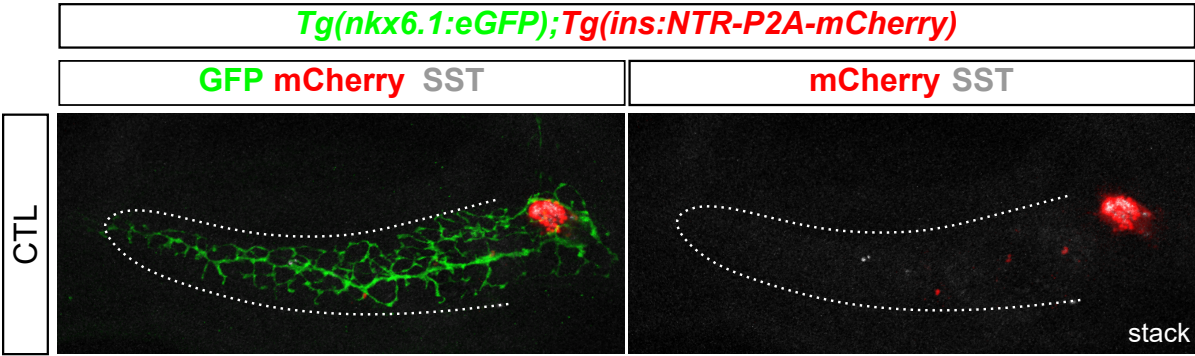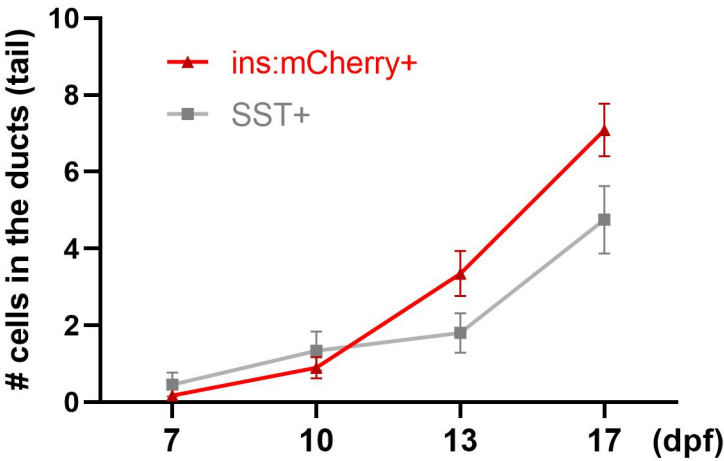

Supplement: supp [file elife-67576-supp-v1.zip › elife_poa_e67576_Figure_7_figure_supplement_1.pdf]
